# Supplementary material
Source: Research Square preprint supplement (doi:10.21203/rs.3.rs-9890117/v1)
Supplement: Supplementary file 1 [file 5592ca45c687f94561919900.xlsx]

## Sheet: raw data
Protein_ID	Protein_Description	Gene_Name	PG_Protein_Groups	PG_Protein_Accessions	PG_Genes	PG_Protein_Descriptions	PG_Protein_Names	Sequence_Number	Ade-1	Ade-2	Ade-3	Ade-4	Ade + E-64-1	Ade + E-64-2	Ade + E-64-3	Ade + E-64-4
A0A075B5J6	Predicted gene, 20730	Gm20730	A0A075B5J6	P01629;A0A075B5J6;A0A2S0DFH6;A0A2S0DFI9	Gm20730	Predicted gene, 20730	A0A075B5J6_MOUSE	1	5841.07	4954.53	4855.96	7996.26			2725.37
A0A075B5J9	Immunoglobulin kappa variable 17-127	Igkv17-121	A0A075B5J9;A0A075B5K3;A0A0G2JDN5;A0A0G2JFA8	A0A075B5J9;A0A075B5K3;A0A0G2JDN5;A0A0G2JFA8	Igkv17-121;Igkv17-127	Immunoglobulin kappa variable 17-127	A0A075B5J9_MOUSE;A0A075B5K3_MOUSE;A0A0G2JDN5_MOUSE;A0A0G2JFA8_MOUSE	1	19633.2	33132.6	22900.5	39119.2	53904.4	41339.2	33381.1	36271.5
A0A075B5K0	Immunoglobulin kappa variable 14-126 (Fragment)	Igkv14-126	A0A075B5K0	A0A075B5K0;I6L9E1	Igkv14-126	Immunoglobulin kappa variable 14-126 (Fragment)	A0A075B5K0_MOUSE	1	3354.69	2827.55	2239.46	3595.97	2972.6	2392.31	2841.87	5361.12
A0A075B5K2	Immunoglobulin kappa chain variable 9-124	Igkv9-124	A0A075B5K2	A0A075B5K2;A0A0G2JDR3	Igkv9-124	Immunoglobulin kappa chain variable 9-124	A0A075B5K2_MOUSE	2	5035.32	9350.21	15674	17794	13672.3	6858.28	13394.7	12729.9
A0A075B5K6	Immunoglobulin kappa variable 2-109 (Fragment)	Igkv2-109	A0A075B5K6	P03976;A0A075B5K6	Igkv2-109	Immunoglobulin kappa variable 2-109 (Fragment)	A0A075B5K6_MOUSE	1	8287.75	7367.55	15464.8	11037.6	9191.88	10692	11302.8	13571
A0A075B5L0	Immunoglobulin kappa variable 10-95	Igkv10-95	A0A075B5L0	P01643;P01644;P01645;P01647;A0A075B5L0;A2NVE9;A2NVF0	Igkv10-95	Immunoglobulin kappa variable 10-95	A0A075B5L0_MOUSE	2	41840.4	22437.5	27494.5	34731	36374	36869	47000.3	41779.5
A0A075B5L7	Immunoglobulin kappa variable 4-80 (Fragment)	Igkv4-80	A0A075B5L7	A0A075B5L7	Igkv4-80	Immunoglobulin kappa variable 4-80 (Fragment)	A0A075B5L7_MOUSE	1	8821.81	3469.07	2528.17	16466.6	6144.6	5980.74	2798.6	3991.49
A0A075B5L8	Immunoglobulin kappa variable 4-79 (Fragment)	Igkv4-57	A0A075B5L8;A0A075B5M4;A0A0A6YYE5;A0A0A6YYE7;A0A0B4J1I3	A0A075B5L8;A0A075B5M4;A0A0A6YYE5;A0A0A6YYE7;A0A0B4J1I3;Q8K1F1;Q8K1F2;U5JE48	Igkv4-57;Igkv4-57-1;Igkv4-74;Igkv4-78;Igkv4-79	Immunoglobulin kappa variable 4-79 (Fragment)	A0A075B5L8_MOUSE;A0A075B5M4_MOUSE;A0A0A6YYE5_MOUSE;A0A0A6YYE7_MOUSE;A0A0B4J1I3_MOUSE	1	17026.6	15248.2	11988	14348	20244.1	22155.2	18423.7	19284.1
A0A075B5M1	Immunoglobulin kappa variable 4-63	Igkv4-63	A0A075B5M1	A0A075B5M1;A0A0G2JFU6	Igkv4-63	Immunoglobulin kappa variable 4-63	A0A075B5M1_MOUSE	3	6731.43	4114.22	4083.71	9207.91	6448.77	6234.93	6974.94	6199.89
A0A075B5M3	Immunoglobulin kappa variable 4-58	Igkv4-58	A0A075B5M3	P01680;A0A075B5L2;A0A075B5M2;A0A075B5M3;A0A0G2JGI6;A0A0G2JH00;A0A679F8Q6	Igkv4-58	Immunoglobulin kappa variable 4-58	A0A075B5M3_MOUSE	3	18114.6	10368.7	14689.4	36248.7	23540.2	25366.5	27160	22490.3
A0A075B5M7	Immunoglobulin kappa variable 5-39	Igkv5-39	A0A075B5M7	A0A075B5M7;A0A0B4J1J1;A0A0B4J1J2;A0A0G2JDV4;A0A0M4KPD8;Q65ZI1	Igkv5-39	Immunoglobulin kappa variable 5-39	A0A075B5M7_MOUSE	3	153517	179042	359510	120001	142604	230460	120336	114729
A0A075B5N3	Immunoglobulin kappa variable 8-28	Igkv8-28	A0A075B5N3	A0A075B5N3;A0A0G2JE47;A0A0G2JFN8;A0A140T8M4;B5UB69	Igkv8-28	Immunoglobulin kappa variable 8-28	A0A075B5N3_MOUSE	4	21295	8576.55	11928.4	14775.3	10693.8	13284.4	12890.1	8215.93
A0A075B5N4	Immunoglobulin kappa chain variable 8-27	Igkv8-27	A0A075B5N4	A0A075B5N4;A0A0G2JF28;A0N262	Igkv8-27	Immunoglobulin kappa chain variable 8-27	A0A075B5N4_MOUSE	6	55546	53402.4	55843.3	93483.1	81713.8	95833.6	98736.4	97467.8
A0A075B5N7	Immunoglobulin kappa variable 6-13	Igkv6-13	A0A075B5N7	A0A075B5N7;A0A0G2JGY3;A0A2S0DFH5	Igkv6-13	Immunoglobulin kappa variable 6-13	A0A075B5N7_MOUSE	2	41288.4	16230.9	40575.2	33450.3	32625.3	39741.1	32942.5	27177.6
A0A075B5N8	Immunoglobulin kappa variable 3-10	Igkv3-10	A0A075B5N8;A0A0G2JGN0;A0A140T8P0	P01661;P01662;P01663;P01670;P01671;P01672;A0A075B5N8;A0A0G2JGN0;A0A140T8P0;Q920E9	Igkv3-10;Igkv3-12	Immunoglobulin kappa variable 3-10	A0A075B5N8_MOUSE;A0A0G2JGN0_MOUSE;A0A140T8P0_MOUSE	1	2699.24	3286.52	2554.4	3344.4	3234.88	2988.69	2608.19	2573.43
A0A075B5N9	Immunoglobulin kappa variable 3-7	Igk	A0A075B5N9;Q5F2I7	P01674;A0A075B5N9;A0A0G2JE31;A0A0M3KL49;Q5F2I7	Igk;Igkv3-7	Immunoglobulin kappa variable 3-7	A0A075B5N9_MOUSE;Q5F2I7_MOUSE	2	24667.2	20280.2	36055.3	40659.5	25927.5	26256.4	26211.9	28198.8
A0A075B5P0	Immunoglobulin kappa variable 3-2 (Fragment)	Igkv3-2	A0A075B5P0	P01654;P01655;P01656;P03977;A0A075B5P0;U5JE80	Igkv3-2	Immunoglobulin kappa variable 3-2 (Fragment)	A0A075B5P0_MOUSE	1	24772.6	9760.99	15491.9	12854.8	8842.99	12497.7	23567.2	19803.5
A0A075B5P3	Immunoglobulin heavy constant gamma 2B (Fragment)	HC	A0A075B5P3;A0A0A6YVP0;A0A0F7QZE4;A0A0F7R1P3;A0A4V6JA63	A0A075B5P3;A0A0A6YVP0;A0A0F7QZE4;A0A0F7R1P3;A0A4V6JA63	HC;Ighg2b	Immunoglobulin heavy constant gamma 2B (Fragment)	A0A075B5P3_MOUSE;A0A0A6YVP0_MOUSE;A0A0F7QZE4_MOUSE;A0A0F7R1P3_MOUSE;A0A4V6JA63_MOUSE	3	53944.6	48226.2	64657.9	73963.3	52803.6	49108.1	46277	30332.5
A0A075B5P5	Immunoglobulin heavy constant gamma 3 (Fragment)	Ighg3	A0A075B5P5;A0A1Y7VJN6;A0A4U9FKB1	P03987;A0A075B5P5;A0A1Y7VJN6;A0A4U9FKB1	Ighg3	Immunoglobulin heavy constant gamma 3 (Fragment)	A0A075B5P5_MOUSE;A0A1Y7VJN6_MOUSE;A0A4U9FKB1_MOUSE	12	94248.7	89470.9	198716	179149	96182.6	101376	137053	99541.7
A0A075B5P8	Immunoglobulin heavy variable 2-2 (Fragment)	Ighv2-2	A0A075B5P8	A0A075B5P8;K7T9V0;K7TDI6;K7TGT1;K7TR13;K7TRB5;K7U6G6;X5J4D3;X5J4D8;X5J4K1;X5J4P4;X5J4S8;X5J536;X5J5K5	Ighv2-2	Immunoglobulin heavy variable 2-2 (Fragment)	A0A075B5P8_MOUSE	1	969.696	1078.74	1163.68	2057.25	1325.17	1066.77	1278.31	1515.85
A0A075B5Q4	Immunoglobulin heavy variable 5-12 (Fragment)	Ighv5-12	A0A075B5Q4	P18525;A0A075B5Q4;A0A0A6YWC7	Ighv5-12	Immunoglobulin heavy variable 5-12 (Fragment)	A0A075B5Q4_MOUSE	1	6687.08	10075.4	12324	12871.3	8730.18	12534.9	10219	6679.62
A0A075B5Q5	Immunoglobulin heavy variable 2-9 (Fragment)	Ighv2-9	A0A075B5Q5	A0A075B5Q5;K7TGP7;X5J4C5;X5J5I1	Ighv2-9	Immunoglobulin heavy variable 2-9 (Fragment)	A0A075B5Q5_MOUSE	1	1014.58	405.056	714.752	1049.59	374.734	687.751
A0A075B5R0	Immunoglobulin heavy variable 5-16	Ighv5-16	A0A075B5R0;A0A0B4J1P4	A0A075B5R0;A0A0B4J1P4;X5J5E3	Ighv5-16	Immunoglobulin heavy variable 5-16	A0A075B5R0_MOUSE;A0A0B4J1P4_MOUSE	3	15792.4	11986.9	10640.4	18387.4	18368.5	31368.1	12017.4	15953.2
A0A075B5R4	Immunoglobulin heavy variable 14-1 (Fragment)	Ighv14-1	A0A075B5R4	A0A075B5R4;X5J522	Ighv14-1	Immunoglobulin heavy variable 14-1 (Fragment)	A0A075B5R4_MOUSE	1	7746.28			8349.01			7202.96
A0A075B5R5	Immunoglobulin heavy variable 4-1 (Fragment)	Ighv4-1	A0A075B5R5	P01812;A0A075B5R5;A0A8D6AR87;A0A978W7D2;K7T9G9;K7TH23;K7TR23;K7U5W1;P01806;P01807;P01808;P01809;Q4V9Z4;X5J4E0;X5J4E4;X5J4E5;X5J4E6;X5J4E7;X5J4K0;X5J4P6;X5J4P7;X5J4P8;X5J4P9;X5J4Q0;X5J4Q1;X5J4U6;X5J4V6;X5J4W8;X5J502;X5J503;X5J504;X5J505;X5J506;X5J507;X5J508;X5J509;X5J570;X5J5A9;X5J5B0;X5J5B2;X5J5B3;X5J5B4;X5J5B5;X5J5L1;X5J5L4;X5J5L5;X5J5L8;X5J5L9;X5J5M0;X5J5S3	Ighv4-1	Immunoglobulin heavy variable 4-1 (Fragment)	A0A075B5R5_MOUSE	4	13967.1	12480.3	15551.4	16140	13240.5	15018.5	18771	15986.5
A0A075B5R7	Immunoglobulin heavy variable 14-2 (Fragment)	Ighv14-2	A0A075B5R7	A0A075B5R7;X5J4F8;X5J4P0;X5J4R5;X5J4T4;X5J520;X5J524;X5J525;X5J540;X5J541;X5J5C9;X5J5K7;X5J5K9	Ighv14-2	Immunoglobulin heavy variable 14-2 (Fragment)	A0A075B5R7_MOUSE	4	20941.8	20480.1	14291.3	19579.4	12548	10941.7	19224.7	10621.2
A0A075B5R9	Immunoglobulin heavy variable V14-3 (Fragment)	Ighv14-3	A0A075B5R9	A0A075B5R4;A0A075B5R9;A0NA69;K7T9J8;K7T9N2;K7TDF9;K7TDJ2;K7TDN5;K7TDQ0;K7TH46;K7TQW9;K7TR29;K7TR49;K7TR86;K7TRF0;K7TRI7;K7TRJ0;K7TRJ3;K7TRM7;K7TRN8;K7TRP3;K7U5S6;K7U5T7;K7U657;K7U681;Q5R3U9;Q5R3X1;Q9JL85;X5J4N6;X5J4S7;X5J4S9;X5J4W7;X5J4Z3;X5J534;X5J535;X5J551;X5J5P6;X5J5P7;X5J5P8;X5J5T4	Ighv14-3	Immunoglobulin heavy variable V14-3 (Fragment)	A0A075B5R9_MOUSE	3	8061.56	6507.97	10816.6	8796.12	10320.1	11184.6	11102.5	9568.79
A0A075B5S1	Immunoglobulin heavy variable 9-1	Ighv9-1	A0A075B5S1;A0A0B4J1P3	A0A075B5S1;A0A0B4J1P3	Ighv9-1	Immunoglobulin heavy variable 9-1	A0A075B5S1_MOUSE;A0A0B4J1P3_MOUSE	4			1996.85		1475.54	7455.72	2655.74
A0A075B5S2	Immunoglobulin heavy variable 7-1 (Fragment)	Ighv7-1	A0A075B5S2	A0A075B5S2;A2NU19	Ighv7-1	Immunoglobulin heavy variable 7-1 (Fragment)	A0A075B5S2_MOUSE	3	2098.57	3517.07	5433.31	3568.45	3048.05	3783.53	3792.78	5409.06
A0A075B5S3	Immunoglobulin heavy variable 14-4	Ighv14-4	A0A075B5S3;A0A0A6YVR1	A0A075B5S3;A0A0A6YVR1;X5J4N6;X5J4Z7	Ighv14-4	Immunoglobulin heavy variable 14-4	A0A075B5S3_MOUSE;A0A0A6YVR1_MOUSE	1	2967.26	5731.77	4413.46		4809.15	1915.55	4394.05	6312.81
A0A075B5S4	Immunoglobulin heavy variable V3-3	Ighv3-3	A0A075B5S4;A0A0A6YWL2	A0A075B5S4;A0A0A6YWL2;X5J4L4	Ighv3-3	Immunoglobulin heavy variable V3-3	A0A075B5S4_MOUSE;A0A0A6YWL2_MOUSE	1		708.762		342.594	957.221	1452.23	2218.5	956.171
A0A075B5S6	Immunoglobulin heavy variable 3-1 (Fragment)	Ighv3-1	A0A075B5S6	P18531;A0A075B5S6;K7TDP3;Q53VR2;Q53VR3;X5J4F0;X5J4F7;X5J4V9;X5J571	Ighv3-1	Immunoglobulin heavy variable 3-1 (Fragment)	A0A075B5S6_MOUSE	2	5410.01	6178.21	7337.97	6706.47	5588.2	5166.82	7512.55	3998.89
A0A075B5T2	Immunoglobulin heavy variable 6-3 (Fragment)	Ighv6-3	A0A075B5T2	P01796;P01797;P01799;P01801;P01803;A0A075B5T2;A0A0A6YWU3;K7THH7;P01804;Q80ZI7	Ighv6-3	Immunoglobulin heavy variable 6-3 (Fragment)	A0A075B5T2_MOUSE	4	19173.8	18102.5	10922.1	24712.2	22111.2	17526.8	21781.7	21438.5
A0A075B5T3	Immunoglobulin heavy variable 6-6 (Fragment)	Ighv6-6	A0A075B5T3	A0A075B5T3;A0A0A6YWS9;J3QK03	Ighv6-6	Immunoglobulin heavy variable 6-6 (Fragment)	A0A075B5T3_MOUSE	6	17488.2	12951.3	18293.3	20314.3	19600.9	18899.1	21071.4	19831.1
A0A075B5T5	Immunoglobulin heavy variable V1-5	Ighv1-5	A0A075B5T5	A0A075B5T5	Ighv1-5	Immunoglobulin heavy variable V1-5	A0A075B5T5_MOUSE	1	16333.3	2464.48	5980.01	8656.1	9832.23	10000.5	8019.92	10214
A0A075B5T6	Immunoglobulin heavy variable V10-3 (Fragment)	Ighv10-3	A0A075B5T6	A0A075B5T6	Ighv10-3	Immunoglobulin heavy variable V10-3 (Fragment)	A0A075B5T6_MOUSE	2	3567.36	2760.01	1775.77	3447.77	3180.42	4214.89	6481.63	2625.22
A0A075B5V0	Immunoglobulin heavy variable 1-26 (Fragment)	Ighv1-19	A0A075B5V0;A0A0A6YWX0	P06330;A0A075B5V0;A0A0A6YWX0;X5J4Y7	Ighv1-19;Ighv1-26	Immunoglobulin heavy variable 1-26 (Fragment)	A0A075B5V0_MOUSE;A0A0A6YWX0_MOUSE	2	8226.41	8000.12	7395.38	6441.07	8981.38	7992.89	8108.41	6624.9
A0A075B5V5	Immunoglobulin heavy variable 1-39 (Fragment)	Ighv1-39	A0A075B5V5	A0A075B5V5;X5J577	Ighv1-39	Immunoglobulin heavy variable 1-39 (Fragment)	A0A075B5V5_MOUSE	1	3847.77	4422.47	4155.61	3799.18	3193.66	2075.15	3422.03	4660.08
A0A075B5V6	Immunoglobulin heavy variable V1-42	Ighv1-42	A0A075B5V6	A0A075B5V6;A0A075B5V7;A0A0A6YXN5;A0A0A6YY38;K7T947;Q920E8;X5J4L2;X5J544	Ighv1-42	Immunoglobulin heavy variable V1-42	A0A075B5V6_MOUSE	8	36358	24421.9	25503.9	32522.6	33281.3	34851	40099.7	37990.1
A0A075B5V8	Immunoglobulin heavy variable 1-47	Ighv1-47	A0A075B5V8;A0A0A6YY41	A0A075B5V8;A0A0A6YY41;X5J4C7;X5J4H4;X5J4N9;X5J4Q4;X5J597;X5J5E2	Ighv1-47	Immunoglobulin heavy variable 1-47	A0A075B5V8_MOUSE;A0A0A6YY41_MOUSE	1	536.731		1117.06			834.932	860.263	1114.41
A0A075B5W5	Immunoglobulin heavy variable V1-54 (Fragment)	Ighv1-54	A0A075B5W5	A0A075B5W5;K7T9B2;K7THE6	Ighv1-54	Immunoglobulin heavy variable V1-54 (Fragment)	A0A075B5W5_MOUSE	1				681.542		1019.89
A0A075B5Y4	Immunoglobulin heavy variable 1-81 (Fragment)	Ighv1-81	A0A075B5Y4	A0A075B5Y4;U5JE79;X5J4I1;X5J4Q6;X5J4V8;X5J5C8;X5J5F0;X5J5S9	Ighv1-81	Immunoglobulin heavy variable 1-81 (Fragment)	A0A075B5Y4_MOUSE	7	57594.2	48995.8	66175.1	72852.5	70744	82298.6	81580.9	88666.1
A0A075B677	Immunoglobulin kappa variable 4-53	Igkv4-53	A0A075B677	A0A075B677	Igkv4-53	Immunoglobulin kappa variable 4-53	A0A075B677_MOUSE	2	2697.07	2237.63	2597.2	2032.76	2033.41	4131	18777.2	3195.96
A0A075B697	Immunoglobulin heavy variable 2-9-1 (Fragment)	Ighv2-9-1	A0A075B697	P01819;P01820;A0A075B697;K7TH54;K7THD7;K7THG4;X5J4N1;X5J5N0	Ighv2-9-1	Immunoglobulin heavy variable 2-9-1 (Fragment)	A0A075B697_MOUSE	1	4878.03	2919.12	7469.01	5559.84	4430.11	9797.3	8783.37
A0A087WNL7	Snf2-related CREBBP activator protein	Gm42715	A0A087WNL7;A0A087WNX7;A0A087WP63;A0A087WQ44;A0A087WQY5	A0A087WNL7;A0A087WNX7;A0A087WP63;A0A087WQ44;Q3U4M6;A0A087WQY5;E9Q9V7	Gm42715;Srcap	Snf2-related CREBBP activator protein	A0A087WNL7_MOUSE;A0A087WNX7_MOUSE;A0A087WP63_MOUSE;A0A087WQ44_MOUSE;A0A087WQY5_MOUSE	2	3877.99	2954.46	3411.99	2660.2	2956.67	2645.66	2663.53	2528.73
A0A087WNW3	Kinectin 1	Ktn1	A0A087WNW3;A0A087WP14;A0A087WP48;A0A087WP85;A0A087WPW5;A0A087WPX0;A0A087WQ25;A0A087WQD0;A0A087WQF8;A0A087WQG4;A0A087WQI3;A0A087WQQ5;A0A087WRS1;A0A087WS04;A0A087WS23;A0A087WS29;F8VQC7	A0A087WNW3;A0A087WP14;A0A087WP48;A0A087WP85;A0A087WPW5;A0A087WPX0;A0A087WQ25;A0A087WQD0;A0A087WQF8;A0A087WQG4;A0A087WQI3;A0A087WQQ5;A0A087WRS1;A0A087WS04;A0A087WS23;A0A087WS29;F8VQC7	Ktn1	Kinectin 1	A0A087WNW3_MOUSE;A0A087WP14_MOUSE;A0A087WP48_MOUSE;A0A087WP85_MOUSE;A0A087WPW5_MOUSE;A0A087WPX0_MOUSE;A0A087WQ25_MOUSE;A0A087WQD0_MOUSE;A0A087WQF8_MOUSE;A0A087WQG4_MOUSE;A0A087WQI3_MOUSE;A0A087WQQ5_MOUSE;A0A087WRS1_MOUSE;A0A087WS04_MOUSE;A0A087WS23_MOUSE;A0A087WS29_MOUSE;F8VQC7_MOUSE	3	8034.25	7049.12	7267.92	6655.9	5238.58	2956.9	3391.59	4527.58
A0A087WP24	Putative protein-lysine deacylase ABHD14B (Fragment)	Abhd14b	A0A087WP24;A0A087WPF8;A0A087WRJ2;A0A087WSR2;E9QN99	A0A087WP24;A0A087WPF8;A0A087WRJ2;A0A087WSR2;E9QN99	Abhd14b	Putative protein-lysine deacylase ABHD14B (Fragment)	A0A087WP24_MOUSE;A0A087WPF8_MOUSE;A0A087WRJ2_MOUSE;A0A087WSR2_MOUSE;E9QN99_MOUSE	1	136330	180396	155645	130172	139733	129006	123494	123716
A0A087WP46	cDNA sequence BC034090	BC034090	A0A087WP46;F6T2X5;Q6ZPL5;Q8K058	A0A087WP46;F6T2X5;Q6ZPL5;Q8K058	BC034090	cDNA sequence BC034090	A0A087WP46_MOUSE;F6T2X5_MOUSE;Q6ZPL5_MOUSE;Q8K058_MOUSE	2	1021.55	1883.32	1106.19	763.351	1431.24	875.09
A0A087WPC9	Dynein, axonemal, heavy chain 7B (Fragment)	Dnah7b	A0A087WPC9	A0A087WPC9	Dnah7b	Dynein, axonemal, heavy chain 7B (Fragment)	A0A087WPC9_MOUSE	1	55494.3	55517.4	54659.6	49185.3	46605.3	44543.8	54910	56314.9
A0A087WPH7	Proteasome (prosome, macropain) 26S subunit, ATPase 3 (Fragment)	Psmc3	A0A087WPH7;Q3U8Y7	Q3U8Y7;A0A087WPH7	Psmc3	Proteasome (prosome, macropain) 26S subunit, ATPase 3 (Fragment)	A0A087WPH7_MOUSE;Q3U8Y7_MOUSE	1	1327.78		816.083	1420.06	1575.63	1849.85	1749.33	1653.05
A0A087WPL5	RNA helicase	Dhx9	A0A087WPL5;E9QNN1	E9QNN1;A0A087WPL5;Q3TF92	Dhx9	RNA helicase	A0A087WPL5_MOUSE;E9QNN1_MOUSE	4	43933.2	46495.8	40432.3	41674.2	41629.4	42529.7	46876	48679.2
A0A087WPN7	Immunoglobulin heavy variable 13-2	Ighv13-2	A0A087WPN7;A0A0A6YWN3	A0A087WPN7;A0A0A6YWN3	Ighv13-2	Immunoglobulin heavy variable 13-2	A0A087WPN7_MOUSE;A0A0A6YWN3_MOUSE	1					3229.05	6005.59	3639.21
A0A087WQ32	GPI ethanolamine phosphate transferase 1	Pign	A0A087WQ32;A0A087WS03;G3X9F1	A0A087WQ32;A0A087WS03;G3X9F1	Pign	GPI ethanolamine phosphate transferase 1	A0A087WQ32_MOUSE;A0A087WS03_MOUSE;G3X9F1_MOUSE	1	883.712	909.489	1687	1053.63	1253.72	1833.71	1636.89	1358.31
A0A087WQ89	MISP family member 3	Misp3	A0A087WQ89	A0A087WQ89;Q9CVC4	Misp3	MISP family member 3	A0A087WQ89_MOUSE	3	4244.68	3152.82	3590.51	4439.33	4746.77	3911.98	3635.37	3229.62
A0A087WQM0	Tensin 1	Tns1	A0A087WQM0;A0A087WQS0;A0A6I8MWZ2;Q3U0Q9;Q7TSV1	A0A6I8MWZ2;Q3U0Q9;A0A087WQM0;A0A087WQS0;Q7TSV1	Tns1	Tensin 1	A0A087WQM0_MOUSE;A0A087WQS0_MOUSE;A0A6I8MWZ2_MOUSE;Q3U0Q9_MOUSE;Q7TSV1_MOUSE	2		13316	9047.79	7936.76	15803.1	11328.2	13179.7	11849.3
A0A087WQN7	5'-3' exoribonuclease 1	Xrn1	A0A087WQN7;F8VQ87	F8VQ87;A0A087WQN7	Xrn1	5'-3' exoribonuclease 1	A0A087WQN7_MOUSE;F8VQ87_MOUSE	1	2802.85	2979.9	2214.46	1644.76	4472.11	3530.7	1736.58	2961.2
A0A087WRT4	FAT atypical cadherin 1	Fat1	A0A087WRT4;A0A1L1SQU7;F2Z4A3;Q9QXA3	A0A087WRT4;A0A1L1SQU7;F2Z4A3;Q9QXA3	Fat1	FAT atypical cadherin 1	A0A087WRT4_MOUSE;A0A1L1SQU7_MOUSE;F2Z4A3_MOUSE;Q9QXA3_MOUSE	23	13835.7	13526	13064.8	14093	15113.3	13699.3	13920.1	13897.2
A0A087WS16	Collagen, type VI, alpha 3	Col6a3	A0A087WS16;J3QQ16	J3QQ16;A0A087WS16	Col6a3	Collagen, type VI, alpha 3	A0A087WS16_MOUSE;J3QQ16_MOUSE	1	181371	190069				183146		179510
A0A087WSK5	UBX domain protein 4 (Fragment)	Ubxn4	A0A087WSK5;A0A0R4J078;Q3ULE5;Q8C0Z0;Q9CRQ1;Q9CT42	A0A0R4J078;A0A087WSK5;Q3ULE5;Q8C0Z0;Q9CRQ1;Q9CT42	Ubxn4	UBX domain protein 4 (Fragment)	A0A087WSK5_MOUSE;A0A0R4J078_MOUSE;Q3ULE5_MOUSE;Q8C0Z0_MOUSE;Q9CRQ1_MOUSE;Q9CT42_MOUSE	1	6800.72	4989.58	5197.47	7415.41	5019.51	5728.84	4635.12	5287.7
A0A087WSP5	Signal transducer and activator of transcription	Stat1	A0A087WSP5;Q3TW11;Q8C3V4;Q8C497;Q8C8M3;Q99K94;Q9D323	A0A087WSP5;Q3TW11;Q8C3V4;Q8C497;Q8C8M3;Q99K94;Q9D323	Stat1	Signal transducer and activator of transcription	A0A087WSP5_MOUSE;Q3TW11_MOUSE;Q8C3V4_MOUSE;Q8C497_MOUSE;Q8C8M3_MOUSE;Q99K94_MOUSE;Q9D323_MOUSE	1	5365.37	5232.02	4288.73	4990.42	6859.1	2931.34	4279.85	2604.84
A0A0A0MQC1	Immunoglobulin heavy variable 3-5	Ighv3-5	A0A0A0MQC1;A0N3V1	A0A0A0MQC1;A0A2S0DFG4;A0N3V1;Q53VQ0;Q53VQ1;Q53VQ4;Q53VQ5;Q53VQ8;Q53VQ9;Q53VR2;Q53VR3	Ighv3-5	Immunoglobulin heavy variable 3-5	A0A0A0MQC1_MOUSE;A0N3V1_MOUSE	1	6119.66	4532.22	6770.55	7401.9	3561.21	6226.16	5908.85	7960.3
A0A0A0MQF7	RIKEN cDNA 1700025G04 gene	1700025G04Rik	A0A0A0MQF7;Q3TJL3	A0A0A0MQF7;Q3TJL3;Q8K207	1700025G04Rik	RIKEN cDNA 1700025G04 gene	A0A0A0MQF7_MOUSE;Q3TJL3_MOUSE	1				599.446		625.437	297.664
A0A0A0MQH5	Microtubule-actin crosslinking factor 1 (Fragment)	Macf1	A0A0A0MQH5	A0A0A0MQH5	Macf1	Microtubule-actin crosslinking factor 1 (Fragment)	A0A0A0MQH5_MOUSE	1	942.621	834.582	1739.66	585.01	601.762		1214.38	899.047
A0A0A6YVW3	Immunoglobulin heavy variable V1-23 (Fragment)	Ighv1-15	A0A0A6YVW3;A0A0A6YXA5	A0A0A6YVW3;A0A0A6YXA5;A0A2S0DFG6;A0A2S0DFG7;A0A2S0DFG8;A0A2S0DFH7;K7TR90;K7TRL3;K7U695;X5J4D2;X5J5A8;X5J5B7	Ighv1-15;Ighv1-23	Immunoglobulin heavy variable V1-23 (Fragment)	A0A0A6YVW3_MOUSE;A0A0A6YXA5_MOUSE	1	6405.1	2221.07	4270.65	3888.95	2840.67	3010.31	3239.71	4133.82
A0A0A6YW80	N(alpha)-acetyltransferase 15, NatA auxiliary subunit	Naa15	A0A0A6YW80;G3X8Y3	G3X8Y3;A0A0A6YW80;A0A0A6YX86	Naa15	N(alpha)-acetyltransferase 15, NatA auxiliary subunit	A0A0A6YW80_MOUSE;G3X8Y3_MOUSE	2	5260.84	4838.35	5684.49	5176.83	5141.8	3742.41	5207.95	4970.6
A0A0A6YWT4	RAB GTPase activating protein 1-like (Fragment)	Rabgap1l	A0A0A6YWT4;A0A0A6YY35	A0A0A6YWT4;A0A0A6YY35;A0A3Q4L343	Rabgap1l	RAB GTPase activating protein 1-like (Fragment)	A0A0A6YWT4_MOUSE;A0A0A6YY35_MOUSE	2	11800.3	19664.6	12605.7	9517.3	12097.3	9179.62	7859.29	14837.3
A0A0A6YX66	Immunoglobulin heavy variable V1-20 (Fragment)	Ighv1-20	A0A0A6YX66	A0A0A6YX66;K7T9J6;X5J4N8;X5J559	Ighv1-20	Immunoglobulin heavy variable V1-20 (Fragment)	A0A0A6YX66_MOUSE	2	9222.54	3447.86	3738.75	4286.94	8597.7	9115.41	6904.74	25359.7
A0A0A6YX73	cAMP-dependent protein kinase type II-alpha regulatory subunit	Prkar2a	A0A0A6YX73;Q8K1M3	Q8K1M3;A0A0A6YX73;Q9CYV3	Prkar2a	cAMP-dependent protein kinase type II-alpha regulatory subunit	A0A0A6YX73_MOUSE;Q8K1M3_MOUSE	2	17288.2	19180.2	12404.9	14683.3	16017.7	14754.2	13153.4	12314.7
A0A0A6YXL5	Immunoglobulin heavy variable 7-4 (Fragment)	Ighv7-4	A0A0A6YXL5	A0A0A6YXL5	Ighv7-4	Immunoglobulin heavy variable 7-4 (Fragment)	A0A0A6YXL5_MOUSE	2	587.062	1954.78	1957.64	1002.98			600.316
A0A0A6YXL6	LPS-responsive beige-like anchor	Lrba	A0A0A6YXL6;A0A0A6YXX3;A0A1D5RM41;E9Q3Y4	A0A0A6YXL6;A0A0A6YXX3;A0A1D5RM41;E9Q3Y4	Lrba	LPS-responsive beige-like anchor	A0A0A6YXL6_MOUSE;A0A0A6YXX3_MOUSE;A0A1D5RM41_MOUSE;E9Q3Y4_MOUSE	4	20909.7	24076.8	18468.2	21833.3	22890.9	22097	23453.2	23410.7
A0A0A6YXN4	Immunoglobulin heavy variable V1-18 (Fragment)	Ighv1-18	A0A0A6YXN4	A0A0A6YXN4	Ighv1-18	Immunoglobulin heavy variable V1-18 (Fragment)	A0A0A6YXN4_MOUSE	3	6691.21	3355.32	4468.27	7175.85	6743.59	7119.58	5217.45	8208.15
A0A0A6YY60	Immunoglobulin heavy variable V8-5 (Fragment)	Ighv8-5	A0A0A6YY60	A0A075B5W4;A0A075B5X1;A0A075B5X4;A0A075B5Y0;A0A075B678;A0A0A6YXA3;A0A0A6YY60;A0A0G2JET1;A0A0M3KL48;Q58E54	Ighv8-5	Immunoglobulin heavy variable V8-5 (Fragment)	A0A0A6YY60_MOUSE	1	2637.19	2023.66		6015.52
A0A0A6YY64	6-phosphofructo-2-kinase/fructose-2,6-biphosphatase 3	Pfkfb3	A0A0A6YY64;A2AUP1;A2AUP3;A2AUP4;A2AUP5;A7UAK4;A7UAK5;A7UAK8;Q3U3S6;Q7TS91;Q8BVM1;Q9ESY2	A0A0A6YY64;A2AUP1;A2AUP3;A2AUP4;A2AUP5;A7UAK4;A7UAK5;A7UAK8;Q3U3S6;Q7TS91;Q8BVM1;Q9ESY2;A0A0A6YW89	Pfkfb3	6-phosphofructo-2-kinase/fructose-2,6-biphosphatase 3	A0A0A6YY64_MOUSE;A2AUP1_MOUSE;A2AUP3_MOUSE;A2AUP4_MOUSE;A2AUP5_MOUSE;A7UAK4_MOUSE;A7UAK5_MOUSE;A7UAK8_MOUSE;Q3U3S6_MOUSE;Q7TS91_MOUSE;Q8BVM1_MOUSE;Q9ESY2_MOUSE	4	4218.47	2968.41	3013.54	4006.27	2595.51	3850.04	3274.07	4941.57
A0A0B4J1G0	Low affinity immunoglobulin gamma Fc region receptor III-A	Fcgr4	A0A0B4J1G0	A0A0B4J1G0	Fcgr4	Low affinity immunoglobulin gamma Fc region receptor III-A	FCG3A_MOUSE	4	11371	8029.47	11968.9	10638.3	19078.2	17437.1	15899.8	12445.4
A0A0B4J1H6	Immunoglobulin kappa chain variable 2-137 (Fragment)	Igkv2-137	A0A0B4J1H6	A0A0B4J1H6;A0A140T8M9;Q6LEM8	Igkv2-137	Immunoglobulin kappa chain variable 2-137 (Fragment)	A0A0B4J1H6_MOUSE	3	24962.5	17148.5	39231.6	30880	21569.7	16598.5	22071.4	20525.1
A0A0B4J1H7	Immunoglobulin kappa variable 1-135 (Fragment)	Igkv1-135	A0A0B4J1H7	A0A0B4J1H7;A2MY50;I6L998	Igkv1-135	Immunoglobulin kappa variable 1-135 (Fragment)	A0A0B4J1H7_MOUSE	5	34598	29629.8	28304.6	46054.2	30575.6	25496.3	30793.9	44276.4
A0A0B4J1I1	Immunoglobulin kappa variable 16-104 (Fragment)	Igkv16-104	A0A0B4J1I1	A0A0B4J1I1;A0A0D4DAH6	Igkv16-104	Immunoglobulin kappa variable 16-104 (Fragment)	A0A0B4J1I1_MOUSE	2	13296.8	8133.21	21227.3	33395.1	38128.4	16548.3	18848.8	13547
A0A0B4J1I5	Immunoglobulin kappa chain variable 4-70 (Fragment)	Igkv4-59	A0A0B4J1I5;A0A0B4J1I8;Q8VDD0	P04940;P04941;P04943;P04944;A0A0B4J1I5;A0A0B4J1I8;A0N275;Q8K1F0;Q8VDD0	Igkv4-59;Igkv4-70	Immunoglobulin kappa chain variable 4-70 (Fragment)	A0A0B4J1I5_MOUSE;A0A0B4J1I8_MOUSE;Q8VDD0_MOUSE	2	40589.4	17109.4	35540	55890.6	42043.2	43242.6	32461.7	33304.8
A0A0B4J1I9	Immunoglobulin kappa variable 4-55 (Fragment)	Igkv4-55	A0A0B4J1I9	P04945;A0A0B4J1I9;Q9U410	Igkv4-55	Immunoglobulin kappa variable 4-55 (Fragment)	A0A0B4J1I9_MOUSE	2	44438.9	23230.3	58868.6	67305.2	31084	30527.2	30804.2	38622.1
A0A0B4J1J0	Immunoglobulin kappa variable 4-50 (Fragment)	Igkv4-50	A0A0B4J1J0	A0A0B4J1J0;I6L9E2	Igkv4-50	Immunoglobulin kappa variable 4-50 (Fragment)	A0A0B4J1J0_MOUSE	2	3774.11	9514.84	3697.23		6902.23	7811.35	3311.52	2794.87
A0A0B4J1J5	Immunoglobulin heavy variable V9-3 (Fragment)	Ighv9-3	A0A0B4J1J5	A0A0B4J1J5	Ighv9-3	Immunoglobulin heavy variable V9-3 (Fragment)	A0A0B4J1J5_MOUSE	4	5721.46	7213.94	8562.44	7030.78	7346.01	10100.9	7885.77	8848.01
A0A0B4J1J6	Immunoglobulin heavy variable 10-1 (Fragment)	Ighv10-1	A0A0B4J1J6	A0A075B5T6;A0A0B4J1J6;K7T952;K7TGZ8;K7U669;Q2VT26;Q2VT28;X5J4K8;X5J5K8	Ighv10-1	Immunoglobulin heavy variable 10-1 (Fragment)	A0A0B4J1J6_MOUSE	2	10410.8	5110.48	7055.66	6730.55	3781.7	6841.2	8143.79	4352.2
A0A0B4J1J7	Immunoglobulin heavy variable 1-82	Igh-VJ558	A0A0B4J1J7;A0A0G2JEU7;Q9D9B8	A0A0B4J1J7;A0A0G2JEU7;Q9D9B8;X5J4G7;X5J4H0;X5J4H8;X5J4I5;X5J4L3;X5J4S3;X5J4S4;X5J4T2;X5J4U0;X5J4Z4;X5J529;X5J530;X5J531;X5J532;X5J5D5;X5J5D6;X5J5E5;X5J5M7;X5J5P2;X5J5P3;X5J5P4;X5J5P5;X5J5T6	Igh-VJ558;Ighv1-82	Immunoglobulin heavy variable 1-82	A0A0B4J1J7_MOUSE;A0A0G2JEU7_MOUSE;Q9D9B8_MOUSE	2	12569.9	3635.14	10738.5	15617.5	16967.3	19649.9	31301.1	25674.3
A0A0B4J1M0	Immunoglobulin heavy variable 1-77	Ighv1-77	A0A0B4J1M0;A0A0G2JGS9	A0A0B4J1M0;A0A0G2JGS9;Q6PJB2;Q9D8L4	Ighv1-77	Immunoglobulin heavy variable 1-77	A0A0B4J1M0_MOUSE;A0A0G2JGS9_MOUSE	2	3806.48	1566.26	17937.8	4571.6	4091.11	5755.07	4336.68	3704.84
A0A0B4J1N0	Immunoglobulin heavy variable 1-76	Ighv1-76	A0A0B4J1N0;A0A0G2JFE9	A0A0B4J1N0;A0A0G2JFE9;Q6PF95	Ighv1-76	Immunoglobulin heavy variable 1-76	A0A0B4J1N0_MOUSE;A0A0G2JFE9_MOUSE	5	49973.8	24693.7	71294.5	55635.8	89523	60806.2	94762.7	86669.9
A0A0B6VQ20	MAb 31C6 light chain	LC	A0A0B6VQ20	A0A0B6VQ20;Q9JL80	LC	MAb 31C6 light chain	A0A0B6VQ20_MOUSE	3	10286	11357	8008.11	13050.7	17709.6	12883.3	22367.8	20850.3
A0A0D3M008	Odorant binding protein 1	5430402E10Rik	A0A0D3M008;A0A0D3M039;B1AVU4;Q9D3N5	B1AVU4;A0A0D3M005;A0A0D3M008;A0A0D3M038;A0A0D3M039;Q9D3N5	5430402E10Rik;Gm14744	Odorant binding protein 1	A0A0D3M008_MOUSE;A0A0D3M039_MOUSE;B1AVU4_MOUSE;Q9D3N5_MOUSE	2	7357.07	6048.41	5158.31	4736.47	6039.58	8176.56		3315.74
A0A0E4B366	MAb 44B1 heavy chain	HC	A0A0E4B366	F6TQW2;P01864;A0A0A6YY53;A0A0E4B366;A0A4U9FGA5;Q58E56;Q9D8L4	HC	MAb 44B1 heavy chain	A0A0E4B366_MOUSE	15	543359	391726	535310	557806	448311	520461	439497	597196
A0A0F7W6M8	Ig Kappa Light chain (Fragment)	IgK	A0A0F7W6M8	P01643;P01644;P01645;P01646;P01647;P01648;P01649;P01670;A0A0F7W6M8;A2N494;A2NHM3;A2NV19;Q58EU8;Q7TQM2;Q7TS98;Q8K1F1;Q9JL74;U5JE80	IgK	Ig Kappa Light chain (Fragment)	A0A0F7W6M8_MOUSE	3	17969.6	12377.9	15563.8	24381.2	19360.9	10045.4	23248.3	14056.6
A0A0G2JDE1	Immunoglobulin heavy variable V8-12 (Fragment)	Ighv8-12	A0A0G2JDE1	A0A0G2JDE1	Ighv8-12	Immunoglobulin heavy variable V8-12 (Fragment)	A0A0G2JDE1_MOUSE	1		31191.5	41311.6	36321.8	61755.9	61490.9	58725.6	73122.6
A0A0G2JDR6	Leucine-rich repeat flightless-interacting protein 2 (Fragment)	Lrrfip2	A0A0G2JDR6;A0A0G2JEF6;A0A0G2JEP4;A0A1L1SSC0;A0A668KLE1;Q8C062	A0A0G2JDR6;A0A0G2JEP4;A0A1L1SSC0;A0A668KLE1;A0A0G2JEF6;Q8C062	Lrrfip2	Leucine-rich repeat flightless-interacting protein 2 (Fragment)	A0A0G2JDR6_MOUSE;A0A0G2JEF6_MOUSE;A0A0G2JEP4_MOUSE;A0A1L1SSC0_MOUSE;A0A668KLE1_MOUSE;Q8C062_MOUSE	1	16776.1	14133.8	14977	14028.1	15772.2	18684.9	17581.2	17145.4
A0A0G2JDV3	Guanylate-binding protein 6	Gbp6	A0A0G2JDV3	A0A0G2JDV3;L7N1X8;Q000W5;Q29RG2;A0A8Q0QEH4;Q05DL4;Q3U8G5	Gbp6	Guanylate-binding protein 6	GBP6_MOUSE	11	17053	14545	25141.4	18956.9	38335.4	28979.8	23515.5	18776.4
A0A0G2JDZ4	Myosin, light chain 10, regulatory	Myl10	A0A0G2JDZ4;E9QNY3	A0A0G2JDZ4;E9QNY3	Myl10	Myosin, light chain 10, regulatory	A0A0G2JDZ4_MOUSE;E9QNY3_MOUSE	2	13401.6	14674.9	16334.8	9523.88	8386.03	11030.1	9874.77	10057.5
A0A0G2JEI7	Immunoglobulin kappa chain variable 12-38 (Fragment)	Igkv12-38	A0A0G2JEI7	A0A0G2JEI7	Igkv12-38	Immunoglobulin kappa chain variable 12-38 (Fragment)	A0A0G2JEI7_MOUSE	3	4007.11	4716	2661.73	6085.41	6126.88	4472.23	3953.73	3450.17
A0A0G2JEI9	Round spermatid basic protein 1-like	Rsbn1l	A0A0G2JEI9;D3Z0K6	D3Z0K6;A0A0G2JEI9	Rsbn1l	Round spermatid basic protein 1-like	A0A0G2JEI9_MOUSE;D3Z0K6_MOUSE	1	2122.34	3025.78	3051.01	2254.18	3637.61	2257.86	2480.15	2049.94
A0A0G2JEP2	Purinergic receptor P2X, ligand-gated ion channel 4	P2rx4	A0A0G2JEP2;D3YYR5;D3Z5U5;J9TN51;Q3TR36;Q3UCX4;Q9Z256;Q9Z257	Q9Z257;D3YYR5;D3Z5U5;Q3TR36;Q3UCX4;Q9Z256;A0A0G2JEP2;J9TN51	P2rx4	Purinergic receptor P2X, ligand-gated ion channel 4	A0A0G2JEP2_MOUSE;D3YYR5_MOUSE;D3Z5U5_MOUSE;J9TN51_MOUSE;Q3TR36_MOUSE;Q3UCX4_MOUSE;Q9Z256_MOUSE;Q9Z257_MOUSE	1	4846.68	2274.18	3507.6	3016.14	5825.77	4186.28	4274.52	3996.47
A0A0G2JES4	Myocyte enhancer factor 2C (Fragment)	Mef2c	A0A0G2JES4;A0A0G2JFI7;A0A0G2JFL7;A0A0G2JFS4;A0A0G2JFX1;A0A0H2UKB6	A0A0G2JES4;A0A0G2JFI7;A0A0G2JFL7;A0A0G2JFS4;A0A0G2JFX1;A0A0H2UKB6	Mef2c	Myocyte enhancer factor 2C (Fragment)	A0A0G2JES4_MOUSE;A0A0G2JFI7_MOUSE;A0A0G2JFL7_MOUSE;A0A0G2JFS4_MOUSE;A0A0G2JFX1_MOUSE;A0A0H2UKB6_MOUSE	1	1636.38	1605.69	1087.03	1286.09	722.633			795.946
A0A0G2JF45	Immunoglobulin kappa variable 14-130 (Fragment)	Igkv14-130	A0A0G2JF45	A0A0G2JF45	Igkv14-130	Immunoglobulin kappa variable 14-130 (Fragment)	A0A0G2JF45_MOUSE	1	1823.82	3299.76	2609.4	2784.42		3222.45	2161	4161.51
A0A0G2JFP4	Ferric-chelate reductase 1	Frrs1	A0A0G2JFP4	Q8K385;A0A0G2JFP4	Frrs1	Ferric-chelate reductase 1	A0A0G2JFP4_MOUSE	9	47258	49522.1	51449	39912.2	56609.8	60033.6	69914	59899.8
A0A0G2JFT8	RUN and FYVE domain containing 3	Rufy3	A0A0G2JFT8	A0A0G2JFT8	Rufy3	RUN and FYVE domain containing 3	A0A0G2JFT8_MOUSE	2	2484.21	3665.26	2842.26	3438.61	6391.02	4525.17	5885.57	5161.68
A0A0G2JFW5	Chloride channel accessory 3A2 (Fragment)	Clca3a2	A0A0G2JFW5;Q3UZ16;Q9EQR4;Q9R070	Q9EQR4;Q9R070;A0A0G2JFW5;Q3UZ16	Clca3a2	Chloride channel accessory 3A2 (Fragment)	A0A0G2JFW5_MOUSE;Q3UZ16_MOUSE;Q9EQR4_MOUSE;Q9R070_MOUSE	2	4102.18	3723.52	6737.42	5998.82	2930.33	6259.78	2844.63	5478.97
A0A0G2JFZ3	Immunoglobulin kappa chain variable 19-93 (Fragment)	Igkv19-93	A0A0G2JFZ3	A0A0G2JFZ3;Q921A6	Igkv19-93	Immunoglobulin kappa chain variable 19-93 (Fragment)	A0A0G2JFZ3_MOUSE	2	17622	10209.7	15066.2	32886.5	15302.8	18393.7	15684.8	20145
A0A0G2JG36	Immunoglobulin kappa chain variable 14-100 (Fragment)	Igkv14-100	A0A0G2JG36	A0A0G2JG36	Igkv14-100	Immunoglobulin kappa chain variable 14-100 (Fragment)	A0A0G2JG36_MOUSE	1	5189.03	2260.2	3193.58	6772.67	3597.21	3413.65	3228.07	5762.23
A0A0G2JG52	Crystallin beta-gamma domain containing 1	Crybg1	A0A0G2JG52;E9PVP1;Q4VC42;Q8C2S1	Q8C2S1;A0A0G2JG52;E9PVP1;Q4VC42	Crybg1	Crystallin beta-gamma domain containing 1	A0A0G2JG52_MOUSE;E9PVP1_MOUSE;Q4VC42_MOUSE;Q8C2S1_MOUSE	3	4365.55	6218.13	5222.13	6223.29	7610.49	6972.84	5929.05	5866.01
A0A0G2JGH6	Zinc finger protein 804B	Zfp804b	A0A0G2JGH6	A0A0G2JGH6;F6QGP8	Zfp804b	Zinc finger protein 804B	A0A0G2JGH6_MOUSE	1	5872.56	5678.08		5156.56	6419.37	5353.46	6370.42
A0A0G2JGK2	Immunoglobulin heavy variable V1-74 (Fragment)	IGHVDJ	A0A0G2JGK2;A2KTK2;A2KTK4	P01750;A0A0G2JGK2;A2KTK2;A2KTK4;X5J4D4;X5J543;X5J5A3;X5J5M6;X5J5Q5;X5J5T7	IGHVDJ;Ighv1-74	Immunoglobulin heavy variable V1-74 (Fragment)	A0A0G2JGK2_MOUSE;A2KTK2_MOUSE;A2KTK4_MOUSE	1	805.785	307.334		313.057
A0A0J9YTR2	Ncbp2 antisense 2 (head to head)	Ncbp2as2	A0A0J9YTR2	A0A0J9YTR2	Ncbp2as2	Ncbp2 antisense 2 (head to head)	A0A0J9YTR2_MOUSE	1	6476.03	3938.2	4991.84	9437.59	7938.21	6471.53	6618.36	6825
A0A0J9YTU1	Ketohexokinase (Fragment)	Khk	A0A0J9YTU1;E9Q1Q9	A0A0J9YTU1;E9Q1Q9	Khk	Ketohexokinase (Fragment)	A0A0J9YTU1_MOUSE;E9Q1Q9_MOUSE	2	157014	159545	156513	132794	145668	131556	112143	118293
A0A0J9YUD5	Nucleoporin 205	Nup205	A0A0J9YUD5;B9EJ54;Q6PDG0;Q6ZQG1	A0A0J9YUD5;B9EJ54;Q6P9L5;Q6P9Y6;Q6PDG0;Q6ZQG1;Q80VE6	Nup205	Nucleoporin 205	A0A0J9YUD5_MOUSE;B9EJ54_MOUSE;Q6PDG0_MOUSE;Q6ZQG1_MOUSE	47	20880.9	19148.6	18599.2	18300	19360.2	19051.3	19770	20346.2
A0A0J9YUG5	Methyltransferase like 27 (Fragment)	Mettl27	A0A0J9YUG5;Q3V1G0;Q8BGM4	A0A0J9YUG5;Q3V1G0;Q8BGM4	Mettl27	Methyltransferase like 27 (Fragment)	A0A0J9YUG5_MOUSE;Q3V1G0_MOUSE;Q8BGM4_MOUSE	6	12164.2	13254.1	12982.3	11985.7	11561.5	13002.4	13437.8	15428.9
A0A0N4SUJ3	N-acetylated alpha-linked acidic dipeptidase-like 2	Naaladl2	A0A0N4SUJ3	A0A0N4SUJ3	Naaladl2	N-acetylated alpha-linked acidic dipeptidase-like 2	A0A0N4SUJ3_MOUSE	6	4355.61	5161.34	4298.15	4966.11	3836.52	5475.39	3985.44	5202.6
A0A0N4SVS6	CCHC-type zinc finger nucleic acid binding protein	Cnbp	A0A0N4SVS6;Q3U935;Q3ULK8	A0A0N4SVS6;Q3U935;Q3ULK8	Cnbp	CCHC-type zinc finger nucleic acid binding protein	A0A0N4SVS6_MOUSE;Q3U935_MOUSE;Q3ULK8_MOUSE	1	4198.3	2848.92	3594.39	3676.03	4040.42	3449.32	3624.41	4239.73
A0A0N4SVX9	Dysferlin	Dysf	A0A0N4SVX9	A0A0N4SUJ2;A0A0N4SUN3;A0A0N4SVX9;E9PXU9	Dysf	Dysferlin	A0A0N4SVX9_MOUSE	2	3292.78	4182.8	4491.91	3418.01	5090.52	3563.82	7343.31	4491.76
A0A0N4SW65	Cytidine monophospho-N-acetylneuraminic acid synthetase	Cmas	A0A0N4SW65;A0A0N4SWC3;A0A0R4J0B4	A0A0R4J0B4;A0A0N4SW65;A0A0N4SWC3	Cmas	Cytidine monophospho-N-acetylneuraminic acid synthetase	A0A0N4SW65_MOUSE;A0A0N4SWC3_MOUSE;A0A0R4J0B4_MOUSE	1	4643.43	5794.19	6650.63	5707.74	8638.23	8080.13		6694.36
A0A0N4SWD7	Pleckstrin homology domain containing, family A member 5 (Fragment)	Plekha5	A0A0N4SWD7;E9Q6H8	A0A0N4SWC0;A0A0N4SWD7;E9Q6H8;Q6ZPK1	Plekha5	Pleckstrin homology domain containing, family A member 5 (Fragment)	A0A0N4SWD7_MOUSE;E9Q6H8_MOUSE	13	8853.96	10301.5	9304.74	9174.9	9764.95	9860.49	10825.2	11425.5
A0A0R4IZY2	Cytochrome P450	Cyp2d26	A0A0R4IZY2	A0A0R4IZY2	Cyp2d26	Cytochrome P450	A0A0R4IZY2_MOUSE	1	2775.4	10057.8	4254.94	2075.9	2455.89	2830.02	5183.58	4164.9
A0A0R4IZY9	tRNA-dihydrouridine(47) synthase [NAD(P)(+)]	Dus3l	A0A0R4IZY9	A0A0R4IZY9	Dus3l	tRNA-dihydrouridine(47) synthase [NAD(P)(+)]	A0A0R4IZY9_MOUSE	1	6519.74	7584.89	7179.43	6171.68	6789	4942.18	7873.11	7121.12
A0A0R4J065	Cysteine protease	Atg4b	A0A0R4J065	A0A0R4J065	Atg4b	Cysteine protease	A0A0R4J065_MOUSE	1	10235.1	9456.97	9409.94	10448	13632.3	9118.49	14203.8	11783.2
A0A0R4J083	Long-chain specific acyl-CoA dehydrogenase, mitochondrial	Acadl	A0A0R4J083	A0A0R4J083	Acadl	Long-chain specific acyl-CoA dehydrogenase, mitochondrial	A0A0R4J083_MOUSE	2	183168	232003	214417	180831	213702	221478	200968	218525
A0A0R4J086	Olfactomedin-like 3	Olfml3	A0A0R4J086	A0A0R4J086	Olfml3	Olfactomedin-like 3	A0A0R4J086_MOUSE	1	3932.9	5953.31	4216.2	4572.85	3316.05	5653.3	4964.42	3320.21
A0A0R4J092	Beta-mannosidase	Manba	A0A0R4J092	A0A0R4J092;D6RGR1	Manba	Beta-mannosidase	A0A0R4J092_MOUSE	3	43354.6	31628.3	40097.3	37126.6	74753.6	81135.9	88980.1	78161.3
A0A0R4J0I1	Serine (or cysteine) peptidase inhibitor, clade A, member 3K	Serpina3k	A0A0R4J0I1	A0A0R4J0I1	Serpina3k	Serine (or cysteine) peptidase inhibitor, clade A, member 3K	A0A0R4J0I1_MOUSE	8	117959	95682.2	106756	125448	121762	114060	90319.2	95204.6
A0A0R4J0L1	Beta-galactosidase	Glb1l2	A0A0R4J0L1;E0CY86;E0CYE1;E0CYW9;Q8BZW3	A0A0R4J0L1;E0CY86;E0CYE1;E0CYW9;Q8BZW3	Glb1l2	Beta-galactosidase	A0A0R4J0L1_MOUSE;E0CY86_MOUSE;E0CYE1_MOUSE;E0CYW9_MOUSE;Q8BZW3_MOUSE	1	3819.22	4387.78	2307.5	2594.79	3119.58	2857.41	2074.03	3955.91
A0A0R4J0L5	Conserved oligomeric Golgi complex subunit 6	Cog6	A0A0R4J0L5;Q8BRB0	A0A0R4J0L5;Q8BRB0	Cog6	Conserved oligomeric Golgi complex subunit 6	A0A0R4J0L5_MOUSE;Q8BRB0_MOUSE	1	2305.67	1953.02	2971.63	1701.35		1211.36		1618.91
A0A0R4J0T0	HscB iron-sulfur cluster co-chaperone	Hscb	A0A0R4J0T0	A0A0R4J0T0	Hscb	HscB iron-sulfur cluster co-chaperone	A0A0R4J0T0_MOUSE	1	2169.18	1912.38	1648.85	2620.55	2560.37	1949.05	2078.83	2058.54
A0A0R4J115	Receptor for retinol uptake STRA6	Stra6	A0A0R4J115	A0A0R4J115	Stra6	Receptor for retinol uptake STRA6	A0A0R4J115_MOUSE	1	920.862	925.462		2506.66		1000.84	357.447	1009.27
A0A0R4J135	Methanethiol oxidase	Selenbp2	A0A0R4J135;G3UWK0;G3UZT2	A0A0R4J135;G3UWK0;G3UZT2	Selenbp2	Methanethiol oxidase	A0A0R4J135_MOUSE;G3UWK0_MOUSE;G3UZT2_MOUSE	1	4306.2	5392.55	5078.33	2520.42	2737.74	2321.17	1314.63	2638.84
A0A0R4J174	Evolutionarily conserved signaling intermediate in Toll pathway, mitochondrial	Ecsit	A0A0R4J174	A0A0R4J174	Ecsit	Evolutionarily conserved signaling intermediate in Toll pathway, mitochondrial	A0A0R4J174_MOUSE	1	1265.45	2795.51	1097.15	2273.11	1651.59	2172.94	1377.98	1217.69
A0A0R4J1B4	Integrin alpha M	Gm49368	A0A0R4J1B4;E9Q5K8;E9Q604;G5E8F1;Q3U1U4	E9Q5K8;A0A0R4J1B4;E9Q604;G5E8F1;Q3TD86;Q3U1U4;Q3U1W4;Q3U3F0;Q3U4I5;D6RJ73	Gm49368;Itgam	Integrin alpha M	A0A0R4J1B4_MOUSE;E9Q5K8_MOUSE;E9Q604_MOUSE;G5E8F1_MOUSE;Q3U1U4_MOUSE	2	4278.29	2365.35	4364.55	5148.95	4278.79	4266	3228.76	4456.16
A0A0R4J1E2	Elongation factor 1-delta	Eef1d	A0A0R4J1E2;A0A0R4J1L2;D3YY68;F6ZFU0;Q80T06;Q91VK2	A0A0R4J1E2;A0A0R4J1L2;D3YY68;F6ZFU0;Q80T06;Q91VK2	Eef1d	Elongation factor 1-delta	A0A0R4J1E2_MOUSE;A0A0R4J1L2_MOUSE;D3YY68_MOUSE;F6ZFU0_MOUSE;Q80T06_MOUSE;Q91VK2_MOUSE	2	2316.13	2172.24	2448.54	2429.6	2654.18	2409.04	3297.39	2545.25
A0A0R4J1H2	Glycerate kinase	Glyctk	A0A0R4J1H2	A0A0R4J1H2	Glyctk	Glycerate kinase	A0A0R4J1H2_MOUSE	2	10747.9	21823.3	17269.5	13698.5	9972.56	10585.4	13500	6139.76
A0A0R4J1H6	Golgin A3	Golga3	A0A0R4J1H6;E9QP99	E9QP99;A0A0R4J1H6;Q3UZV1	Golga3	Golgin A3	A0A0R4J1H6_MOUSE;E9QP99_MOUSE	2	7381.15	5172.47	5430.87	6731.21	3637.66	4325.19	3674.22	4979.9
A0A0R4J1V0	PDZ domain containing 1	Pdzk1	A0A0R4J1V0	A0A0R4J1V0	Pdzk1	PDZ domain containing 1	A0A0R4J1V0_MOUSE	3	4538.92	10924.6	9659.92	9759.23	8844.14	6547.52	8740.85	6514.67
A0A0R4J1Y3	N(6)-L-threonylcarbamoyladenine synthase	Osgep	A0A0R4J1Y3;E9QMF4;Q3UQ67	A0A0R4J1Y3;E9QMF4;Q3UQ67	Osgep	N(6)-L-threonylcarbamoyladenine synthase	A0A0R4J1Y3_MOUSE;E9QMF4_MOUSE;Q3UQ67_MOUSE	2	11248	7205.3	9829.55	9512.99	10589.8	10636.6	12172.6	10463.6
A0A0R4J207	Proteoglycan 4 (megakaryocyte stimulating factor, articular superficial zone protein)	Prg4	A0A0R4J207;A1L3C5;E0CZ58	A0A0R4J207;A1L3C5;E0CZ58	Prg4	Proteoglycan 4 (megakaryocyte stimulating factor, articular superficial zone protein)	A0A0R4J207_MOUSE;A1L3C5_MOUSE;E0CZ58_MOUSE	1			4188.39	4435.75	9489.69	8042.06	7296.92	9642.94
A0A0R4J256	Proteasome subunit beta	Psmb9	A0A0R4J256;Q3TAR7;Q3U7A7	A0A0R4J256;Q3TAR7;Q3U7A7	Psmb9	Proteasome subunit beta	A0A0R4J256_MOUSE;Q3TAR7_MOUSE;Q3U7A7_MOUSE	2	16306.3	13481.3	20882.5	16291.2	23919.4	23137.7	22078.5	20709.3
A0A0R4J288	Decapping nuclease	Dxo	A0A0R4J288;G3UX82;G3UZ39;G3UZP8	A0A0R4J288;G3UX82;G3UZ39;G3UZP8	Dxo	Decapping nuclease	A0A0R4J288_MOUSE;G3UX82_MOUSE;G3UZ39_MOUSE;G3UZP8_MOUSE	1	7100.16	5335.71	9190.35	7492.38	8807.67	11621.9		10340.4
A0A0R4J2D3	MIA SH3 domain ER export factor 3	Mia3	A0A0R4J2D3	A0A0R4J2D3	Mia3	MIA SH3 domain ER export factor 3	A0A0R4J2D3_MOUSE	1	5528.01	3862.77	8018.04	6593.66	6270.48	5007.97	5646.7	6381.98
A0A0U1RNT4	RIKEN cDNA 1600014C10 gene	1600014C10Rik	A0A0U1RNT4;J3QPY0	A0A0U1RNT4;Q8WUR0;J3QPY0	1600014C10Rik	RIKEN cDNA 1600014C10 gene	A0A0U1RNT4_MOUSE;J3QPY0_MOUSE	2	15548.2	12865.9	13854.4	17905.7	14916.9	13950.5	12797	15289.1
A0A0U1RP81	MICOS complex subunit MIC60	Immt	A0A0U1RP81;A0A1B0GX08;E9PVS5;Q3TZK4	A0A0U1RP81;A0A1B0GX08;E9PVS5;Q3TZK4	Immt	MICOS complex subunit MIC60	A0A0U1RP81_MOUSE;A0A1B0GX08_MOUSE;E9PVS5_MOUSE;Q3TZK4_MOUSE	1	22310.7	21975.9	20254.5	24532.4	15615.1	16436.8	16515.2	20647.3
A0A0U1RPA0	Pleckstrin homology domain containing, family A member 7 (Fragment)	Plekha7	A0A0U1RPA0;A0A1L1SU82;A0A1L1SV63	A0A0U1RPA0;A0A1L1SU82;A0A1L1SV63	Plekha7	Pleckstrin homology domain containing, family A member 7 (Fragment)	A0A0U1RPA0_MOUSE;A0A1L1SU82_MOUSE;A0A1L1SV63_MOUSE	1	1277.29	2057.32	3290.99	3379.7	1230.95
A0A140LHD4	Mitochondrial ribosomal protein L48 (Fragment)	Mrpl48	A0A140LHD4;A0A140LHT6;A0A140LI38	A0A140LHD4;A0A140LHT6;A0A140LI38;A0A140LI40;A2VCS1	Mrpl48	Mitochondrial ribosomal protein L48 (Fragment)	A0A140LHD4_MOUSE;A0A140LHT6_MOUSE;A0A140LI38_MOUSE	3	2000.09	1695.5	2373.82	1465.77	1309.58	1881.59	1546.84	1267.85
A0A140LI69	Zinc finger protein 444 (Fragment)	Zfp444	A0A140LI69;D3Z1T3;D3Z688;E9Q3H2;Q3TDV8;Q8BJ97;Q8CGH9;Q9CZA1	A0A140LI69;A0A140LIC1;D3Z1T3;D3Z688;E9Q3H2;Q3TDV8;Q8BJ97;Q8CGH9;Q9CZA1	Zfp444	Zinc finger protein 444 (Fragment)	A0A140LI69_MOUSE;D3Z1T3_MOUSE;D3Z688_MOUSE;E9Q3H2_MOUSE;Q3TDV8_MOUSE;Q8BJ97_MOUSE;Q8CGH9_MOUSE;Q9CZA1_MOUSE	2	8123.29	8263.97	7726.15	5617.73	7614.09	5765.77	8282.91	6663.39
A0A140LI95	RAP1 GTPase activating protein 2 (Fragment)	Rap1gap2	A0A140LI95	A0A140LI95	Rap1gap2	RAP1 GTPase activating protein 2 (Fragment)	A0A140LI95_MOUSE	1	2668.98	3256.2	2715.27	3811.58	1996.29	3172.49	2396.66	3281.5
A0A140LIF8	Immunity-related GTPase family M protein 2	Irgm2	A0A140LIF8	A0A140LIF8;A0A9L6JKG1;Q6ZQL9	Irgm2	Immunity-related GTPase family M protein 2	IRGM2_MOUSE	3	2366.46	1505.29	2277.8	3757.49	4976.82	3033.5	2873.1	2126.16
A0A140LIX9	Cilia and flagella associated protein 99	Cfap99	A0A140LIX9	A0A140LIX9	Cfap99	Cilia and flagella associated protein 99	A0A140LIX9_MOUSE	1	14775.8	11488.6	10525.1					12567.5
A0A140LJF9	aldehyde dehydrogenase (NAD(+)) (Fragment)	Aldh3a2	A0A140LJF9;Q99PH4	Q99PH4;A0A140LJF9	Aldh3a2	aldehyde dehydrogenase (NAD(+)) (Fragment)	A0A140LJF9_MOUSE;Q99PH4_MOUSE	1	5745.71	7604.77	7173.03	8816.57	5859.21	5339.33	4270.56	4642.71
A0A140T8M1	Immunoglobulin kappa variable 10-96 (Fragment)	Igkv10-96	A0A140T8M1;A1A540	P01644;P01645;P01646;P01647;P01648;P04946;A0A140T8M1;A1A540;A2NVE9;A2NVF0	Igkv10-96	Immunoglobulin kappa variable 10-96 (Fragment)	A0A140T8M1_MOUSE;A1A540_MOUSE	2	97550.5	48531.4	77382.6	71546.2	74644.1	53122.8	89987.1	73777.9
A0A140T8M2	Immunoglobulin kappa variable 12-44 (Fragment)	Igkv12-44	A0A140T8M2	A0A140T8M2;A2NMA3	Igkv12-44	Immunoglobulin kappa variable 12-44 (Fragment)	A0A140T8M2_MOUSE	4	47532.7	33119.5	67437.6	114254	76140.6	127037	97034.8	103940
A0A140T8M3	Immunoglobulin kappa chain variable 8-30 (Fragment)	CP1-10VL	A0A140T8M3;B5UB63;B5UB65	A0A140T8M3;A2N494;B5UB61;B5UB63;B5UB65	CP1-10VL;CP3-10VL;Igkv8-30	Immunoglobulin kappa chain variable 8-30 (Fragment)	A0A140T8M3_MOUSE;B5UB63_MOUSE;B5UB65_MOUSE	2	9465.37	6451.96	6911.25	13198.1	10184.8	9576.62	14378.8	13737.7
A0A140T8M4	Immunoglobulin kappa variable 8-19	Igkv8-19	A0A140T8M4	A0A0G2JFN8;A0A140T8M4	Igkv8-19	Immunoglobulin kappa variable 8-19	A0A140T8M4_MOUSE	3	4813.65	3105.74	5725.37	6453.46	6323.99	11482.5	18508	6843.17
A0A140T8M5	Immunoglobulin kappa variable 6-15 (Fragment)	Igkv6-15	A0A140T8M5	P84750;A0A0G2JDG9;A0A0G2JGT0;A0A140T8M5	Igkv6-15	Immunoglobulin kappa variable 6-15 (Fragment)	A0A140T8M5_MOUSE	6	74010.4	44783.8	59598.8	83165.6	77839	87644	80928.5	88269.5
A0A140T8M6	Immunoglobulin kappa chain variable 3-5 (Fragment)	Igkv3-5	A0A140T8M6	P01660;A0A140T8M6	Igkv3-5	Immunoglobulin kappa chain variable 3-5 (Fragment)	A0A140T8M6_MOUSE	1	24813.1	11446.6	46588.7	24327.9	10692.3	21987.7	12509.9	13206.8
A0A140T8N3	Immunoglobulin kappa chain variable 13-84 (Fragment)	Igkv13-84	A0A140T8N3;Q7TQM2	A0A075B666;A0A0M5KS39;A0A140T8N3;Q7TQM2	Igkv13-84;scFv	Immunoglobulin kappa chain variable 13-84 (Fragment)	A0A140T8N3_MOUSE;Q7TQM2_MOUSE	2	55366.6	41678.1	50071.2	46005.8	59166.4	86854.1	32750.5	59105.2
A0A140T8N5	Immunoglobulin kappa variable 6-23 (Fragment)	Igkv6-23	A0A140T8N5	A0A140T8N5	Igkv6-23	Immunoglobulin kappa variable 6-23 (Fragment)	A0A140T8N5_MOUSE	2	3618.17	2283.22	3481.49	4894.15	5637.5	5785.58	5411.65	5301.07
A0A140T8N7	Immunoglobulin kappa chain variable 6-25 (Fragment)	Igkv6-17	A0A140T8N7;A0A140T8Q3	A0A140T8N7;A0A140T8Q3	Igkv6-17;Igkv6-25	Immunoglobulin kappa chain variable 6-25 (Fragment)	A0A140T8N7_MOUSE;A0A140T8Q3_MOUSE	3	2002.75	427.887	2206.22	3478.17	2721.39	2608.07	3416.57	3363.4
A0A140T8N8	Immunoglobulin kappa variable 9-123 (Fragment)	Igkv9-123	A0A140T8N8	A0A140T8N8	Igkv9-123	Immunoglobulin kappa variable 9-123 (Fragment)	A0A140T8N8_MOUSE	2	4247.1	19388.4	20049.3	5345.58	6579.36	3585.6	3049.99	1949.41
A0A140T8N9	Immunoglobulin kappa variable 6-32 (Fragment)	Igkv6-32	A0A140T8N9	P01633;P01634;A0A075B5N7;A0A0G2JGY3;A0A140T8N9;A0A140T8P2;A0A140T8Q3;A0A2S0DFH5;A2IXM7;Q9JL74	Igkv6-32	Immunoglobulin kappa variable 6-32 (Fragment)	A0A140T8N9_MOUSE	5	43010.3	31222.1	50404	65722.3	105721	94150	74747.1	121212
A0A140T8P1	Immunoglobulin kappa variable 6-14 (Fragment)	Igkv6-14	A0A140T8P1	A0A140T8P1	Igkv6-14	Immunoglobulin kappa variable 6-14 (Fragment)	A0A140T8P1_MOUSE	2	3076.13	4877.8	3399.16	8974.36	5748.17	7969.19	5072.49	6687.71
A0A140T8P3	Immunoglobulin kappa chain variable 15-103 (Fragment)	Igkv15-103	A0A140T8P3	A0A140T8P3	Igkv15-103	Immunoglobulin kappa chain variable 15-103 (Fragment)	A0A140T8P3_MOUSE	2	6435.76	4011.23	6845.94	11125.6	13519.2	10490.5	7367.6	27318.7
A0A140T8P4	Immunoglobulin kappa variable 3-9 (Fragment)	Igkv3-9	A0A140T8P4	A0A140T8P4	Igkv3-9	Immunoglobulin kappa variable 3-9 (Fragment)	A0A140T8P4_MOUSE	1						6209.96	10047.1	13586.2
A0A140T8P5	Immunoglobulin kappa chain variable 8-24 (Fragment)	Igkv8-24	A0A140T8P5	A0A140T8P5;A2N1N1	Igkv8-24	Immunoglobulin kappa chain variable 8-24 (Fragment)	A0A140T8P5_MOUSE	2	12082.4	8571.59	16965.2	38824.2	20250.6	14024.1	23988.2	15710.7
A0A140T8P6	Immunoglobulin kappa variable 12-46 (Fragment)	G8(anti-MRBC)	A0A140T8P6;I6L958;Q5R3T5	A0A140T8P6;I6L958;Q5R3T5	G8(anti-MRBC);Igk;Igkv12-46	Immunoglobulin kappa variable 12-46 (Fragment)	A0A140T8P6_MOUSE;I6L958_MOUSE;Q5R3T5_MOUSE	2	37577.5	16479	35173.7	33848.1	15483.8	27116.4	20401.4	20849.4
A0A140T8P9	Immunoglobulin kappa variable 14-111 (Fragment)	Igkv14-111	A0A140T8P9	P01637;P01638;A0A075B5K0;A0A140T8P9;I6L9E1;Q7TS98	Igkv14-111	Immunoglobulin kappa variable 14-111 (Fragment)	A0A140T8P9_MOUSE	5	28879.8	28649.5	36606.2	46714.4	48125	43990.4	66270.8	42620.9
A0A140T8Q0	Immunoglobulin kappa variable 3-3 (Fragment)	Igkv3-3	A0A140T8Q0;A0A140T8Q4	P01664;P01665;P01666;P01668;A0A097PUG4;A0A140T8Q0;A0A140T8Q4	Igkv3-3;Igkv3-4	Immunoglobulin kappa variable 3-3 (Fragment)	A0A140T8Q0_MOUSE;A0A140T8Q4_MOUSE	1	16175.1	7892.39	13388.7	13703.3	10123.5	6436.65	7678.77	10113.4
A0A1B0GR60	Ferritin	Ftl1	A0A1B0GR60;Q9CPX4	A0A1B0GR60;Q3UCL5;Q3UL79;Q9CPX4;Q9CZE7	Ftl1	Ferritin	A0A1B0GR60_MOUSE;Q9CPX4_MOUSE	1	479552	512264	421736	490866	522357	556130	570503	469530
A0A1B0GRV0	3'(2'),5'-bisphosphate nucleotidase 1	Bpnt1	A0A1B0GRV0	A0A1B0GRV0	Bpnt1	3'(2'),5'-bisphosphate nucleotidase 1	A0A1B0GRV0_MOUSE	1	1378.73	2228.76	671.482	1266.05	935.667	1469.25	1304.87	1216.7
A0A1B0GS75	Interferon induced transmembrane protein 6	Ifitm6	A0A1B0GS75;Q3SXF0	A0A1B0GS75;Q3SXF0	Ifitm6	Interferon induced transmembrane protein 6	A0A1B0GS75_MOUSE;Q3SXF0_MOUSE	3	2537.76	1623.72	2026.53	2955.91	2373.26	2201.82	2584.05	5567.18
A0A1B0GSX7	Nuclear pore complex protein Nup98-Nup96	Nup98	A0A1B0GSX7	A0A1B0GSX7	Nup98	Nuclear pore complex protein Nup98-Nup96	A0A1B0GSX7_MOUSE	1	5929.68	5031.13	3743.99	3682.94	4703.76	6859.49	6134.12	5994.42
A0A1B0GXL1	Nebulette (Fragment)	Nebl	A0A1B0GXL1;B7ZCI2;B7ZCI3;Q8BWC6	B7ZCI2;A0A1B0GXL1;B7ZCI3;Q8BWC6	Nebl	Nebulette (Fragment)	A0A1B0GXL1_MOUSE;B7ZCI2_MOUSE;B7ZCI3_MOUSE;Q8BWC6_MOUSE	1	8769.42		11940.7	10558.7	9605.5
A0A1D5RLL4	Transformation/transcription domain-associated protein	Trrap	A0A1D5RLL4;E9PWT1;E9PZA7;E9QLK7	A0A1D5RLL4;E9PWT1;E9PZA7;E9QLK7;F7CGG2	Trrap	Transformation/transcription domain-associated protein	A0A1D5RLL4_MOUSE;E9PWT1_MOUSE;E9PZA7_MOUSE;E9QLK7_MOUSE	15	13052.8	13943	13856	15447.8	14470.4	14686.7	15832.9	13040.6
A0A1D5RLZ3	Dystonin (Fragment)	Dst	A0A1D5RLZ3	S4R1P5;A0A087WSP0;A0A1D5RLZ3;Q6ZQ59	Dst	Dystonin (Fragment)	A0A1D5RLZ3_MOUSE	3	6934.4	7082.89	7386.54	4452.23	7525.6	6824.93	8383.6	7084.91
A0A1D5RMI9	Methenyltetrahydrofolate synthetase domain containing	Mthfsd	A0A1D5RMI9;D3Z0Q4;D3Z1R2;D3Z4L1	A0A1D5RMI9;D3Z0Q4;D3Z1R2;D3Z4L1	Mthfsd	Methenyltetrahydrofolate synthetase domain containing	A0A1D5RMI9_MOUSE;D3Z0Q4_MOUSE;D3Z1R2_MOUSE;D3Z4L1_MOUSE	1	4889.25	7838.33	6700.93	9419.59	7710.38	5615.43	2366.67	10021.7
A0A1D5RMM1	Dedicator of cytokinesis 9	Dock9	A0A1D5RMM1;B2RXS7;F8VPN7;Q7TN11	A0A1D5RMM1;B2RXS7;B2RY79;E9QMR2;F8VPN7;Q6PF84;Q7TN11	Dock9	Dedicator of cytokinesis 9	A0A1D5RMM1_MOUSE;B2RXS7_MOUSE;F8VPN7_MOUSE;Q7TN11_MOUSE	2	5149.62	6017.05	6050.49	3887.81	4531.54	3235.12	4591.61	4603.11
A0A1G5SJ81	Irgb6 homologue	OTTMUSPWKG00059381	A0A1G5SJ81;Q4FK68;Q566I8	Q8K242;A0A1G5SJ81;Q3TLR6;Q4FK68;Q566I8	OTTMUSPWKG00059381;Tgtp	Irgb6 homologue	A0A1G5SJ81_MOUSE;Q4FK68_MOUSE;Q566I8_MOUSE	1	4221.96	3922.1			3034.83	4426.4	5439.35	3967.42
A0A1G5SK64	Immunity related GTPase family D	Ifi47	A0A1G5SK64;Q61635	Q3U0K0;Q61635;Q99M59;A0A1G5SK64;U5NG85	Ifi47;OTTMUSWSBG00059284	Immunity related GTPase family D	A0A1G5SK64_MOUSE;Q61635_MOUSE	19	53589	48489.6	69697.8	69643.9	90783.2	69487.3	71174.7	60854.7
A0A1L1SQ41	Arginyl-tRNA--protein transferase 1	Ate1	A0A1L1SQ41;J3QNU1;Q80YP1	A0A1L1SQ41;J3QNU1;Q80YP1	Ate1	Arginyl-tRNA--protein transferase 1	A0A1L1SQ41_MOUSE;J3QNU1_MOUSE;Q80YP1_MOUSE	1	1815.42	2450.03	2644.62	2684.71	1703.09	2081.49	1770.7	1357.37
A0A1L1SQ51	Talin 2	Tln2	A0A1L1SQ51;A0A1L1SRI1;E9PUM4;Q68FD6;Q8CDM9;Q8CHG4	A0A1L1SQ51;B2RY15;E9PUM4;Q68FD6;Q9CS79;A0A1L1SQP9;A0A1L1SRI1;Q6PB69;Q8CDM9;Q8CHG4	Tln2	Talin 2	A0A1L1SQ51_MOUSE;A0A1L1SRI1_MOUSE;E9PUM4_MOUSE;Q68FD6_MOUSE;Q8CDM9_MOUSE;Q8CHG4_MOUSE	6	14316.9	12433.3	12814.3	15122.4	11896.3	13940.5	15366.6	12261.6
A0A1L1SQP8	FXYD domain-containing ion transport regulator	Fxyd2	A0A1L1SQP8;A0A1L1SR73;A0A1L1SUA9;Q6ITT1	A0A1L1SQP8;A0A1L1SUA9;Q6ITT1;A0A1L1SR73	Fxyd2	FXYD domain-containing ion transport regulator	A0A1L1SQP8_MOUSE;A0A1L1SR73_MOUSE;A0A1L1SUA9_MOUSE;Q6ITT1_MOUSE	1	54509.7	68609.5	56237.2	84643.2	49310.7	42227.8	40467.3	49964.9
A0A1L1SS44	Amyloid beta precursor-like protein 2 (Fragment)	Aplp2	A0A1L1SS44;Q3TPZ7;Q3UDL6;Q60709;Q61482	Q3UDL6;Q60709;A0A1L1SS44;Q3TPZ7;Q61482	Aplp2;Cdebp	Amyloid beta precursor-like protein 2 (Fragment)	A0A1L1SS44_MOUSE;Q3TPZ7_MOUSE;Q3UDL6_MOUSE;Q60709_MOUSE;Q61482_MOUSE	3	4669.66	5253.94	4413.04	4682.67	9793.88	10505	8820.57	9641.13
A0A1L1SSC7	Tetratricopeptide repeat domain 13	Ttc13	A0A1L1SSC7	A0A1L1SSC7;A0A338P6N2;D3YVV0;E9Q723;Q3UMK4;Q68FG8	Ttc13	Tetratricopeptide repeat domain 13	A0A1L1SSC7_MOUSE	2	3266.02		1819.22	2537.98	3027.53	2665.3	2556.63	1788.45
A0A1L1SSF8	RIKEN cDNA 4931406C07 gene	4931406C07Rik	A0A1L1SSF8	Q91V76;A0A1L1SSF8	4931406C07Rik	RIKEN cDNA 4931406C07 gene	A0A1L1SSF8_MOUSE	19	228946	335049	324596	316846	277018	261414	240898	238470
A0A1L1SSV8	non-specific serine/threonine protein kinase (Fragment)	Taok2	A0A1L1SSV8	A0A1L1SSV8	Taok2	non-specific serine/threonine protein kinase (Fragment)	A0A1L1SSV8_MOUSE	2	879.47	1520.79	1371.91	1348.27	1205.17	1319.87	2272.03	1730.76
A0A1L1ST86	RIKEN cDNA 4931406C07 gene	4931406C07Rik	A0A1L1ST86	Q91V76;A0A1L1ST86	4931406C07Rik	RIKEN cDNA 4931406C07 gene	A0A1L1ST86_MOUSE	2	93532.7	90663.8	82977.7	63109.3	78316	74067.9	55652.1	60258.8
A0A1L1SUI3	Solute carrier family 37 (glucose-6-phosphate transporter), member 4	Slc37a4	A0A1L1SUI3;Q9D1F9	A0A1L1SUI3;Q9D1F9;Q9Z295;Q6WG34	Slc37a4	Solute carrier family 37 (glucose-6-phosphate transporter), member 4	A0A1L1SUI3_MOUSE;Q9D1F9_MOUSE	5	24642	35648.6	30634.6	30841.4	28273.5	32554.1	36235.4	28655.5
A0A1L1SUR6	RIKEN cDNA 1700017B05 gene	1700017B05Rik	A0A1L1SUR6;B9EKK8	Q3TEI4;A0A1L1SUR6;A0PJL0;B9EKK8;Q8BNT0	1700017B05Rik	RIKEN cDNA 1700017B05 gene	A0A1L1SUR6_MOUSE;B9EKK8_MOUSE	1	2567.93				3990.72	1361.35	3278.7	2467.16
A0A1L1SUS1	Olfactory receptor	Or7e165	A0A1L1SUS1;Q7TRF5;Q7TRF6;Q7TRF7;Q8VFJ1;Q9Z1U1	A0A1L1SUS1;Q7TRF5;Q7TRF6;Q7TRF7;Q8VFJ1;Q9Z1U1;Q8K532;Q8VFF5	Or7e165;Or7e166;Or7e168;Or7e170	Olfactory receptor	A0A1L1SUS1_MOUSE;Q7TRF5_MOUSE;Q7TRF6_MOUSE;Q7TRF7_MOUSE;Q8VFJ1_MOUSE;Q9Z1U1_MOUSE	1		1959.26		2923.11	2444.51			2638.93
A0A1L7NR63	C-Cbl associated protein	Sorbs1	A0A1L7NR63;A0A286YCQ0;A0A286YDN0;A0A5F8MPJ2;A0A668KL65;D3Z5J3;E9Q6A3;E9QNA7	A0A1L7NR63;A0A286YCI8;A0A286YCQ0;A0A286YDN0;A0A5F8MPJ2;A0A668KL65;D3Z5J3;E9PYX6;E9Q6A3;E9QNA7	Sorbs1	C-Cbl associated protein	A0A1L7NR63_MOUSE;A0A286YCQ0_MOUSE;A0A286YDN0_MOUSE;A0A5F8MPJ2_MOUSE;A0A668KL65_MOUSE;D3Z5J3_MOUSE;E9Q6A3_MOUSE;E9QNA7_MOUSE	2	12974.1	16078.8	14714.6	13273	10037.3	11100	12270.8	9842.38
A0A1W2P6X0	RIKEN cDNA 1500009L16 gene (Fragment)	1500009L16Rik	A0A1W2P6X0	A0A1W2P6X0;P0C913	1500009L16Rik	RIKEN cDNA 1500009L16 gene (Fragment)	A0A1W2P6X0_MOUSE	1	799.402	548.187	1120.47	1542.34	1278.54	1670.67	1399.42	1299.44
A0A1W2P7G5	Coenzyme Q10A	Coq10a	A0A1W2P7G5;A0A1W2P7J1;E9Q3H6	A0A1W2P7G5;A0A1W2P7J1;E9Q3H6	Coq10a	Coenzyme Q10A	A0A1W2P7G5_MOUSE;A0A1W2P7J1_MOUSE;E9Q3H6_MOUSE	4	9088.12	13182.7	11622.2	8924.87	8537.2	7751.18	9166.33	9655.82
A0A1W2P7J4	ATPase family, AAA domain containing 2B (Fragment)	Atad2b	A0A1W2P7J4	A0A1W2P7J4	Atad2b	ATPase family, AAA domain containing 2B (Fragment)	A0A1W2P7J4_MOUSE	2	5596.48	4907.43	4374.63	5455.97	3293.2	4535.38	5925.88	4999.89
A0A1W2P7K6	RAB3A interacting protein	Rab3ip	A0A1W2P7K6	A0A1W2P7K6	Rab3ip	RAB3A interacting protein	A0A1W2P7K6_MOUSE	1			1516.68	3592.48	3653.29	1585.97	1974.52
A0A1W2P7W7	Tight junction protein 3 (Fragment)	Tjp3	A0A1W2P7W7;Q3UZ47;Q921G9	Q3UZ47;Q921G9;A0A1W2P7W7	Tjp3	Tight junction protein 3 (Fragment)	A0A1W2P7W7_MOUSE;Q3UZ47_MOUSE;Q921G9_MOUSE	1	5253.52	5559.09	6414.55	5884.05	4910.2	5763.88	5173.98	4838.78
A0A1W2P870	Glutamine amidotransferase like class 1 domain containing 3A (Fragment)	Gatd3a	A0A1W2P870	A0A1W2P870	Gatd3a	Glutamine amidotransferase like class 1 domain containing 3A (Fragment)	A0A1W2P870_MOUSE	1	4120.07	7927.42	5450.85	4672.94	4667.98	4092.67	3883.62	3904.24
A0A1W2P872	RNA-binding protein Nova-2	Nova2	A0A1W2P872	A0A1W2P872	Nova2	RNA-binding protein Nova-2	NOVA2_MOUSE	1	871.66	1155.75	1761.39	2850.1	1551.1	1067.79	1085.37	1008.99
A0A1W2P8C0	Erythrocyte membrane protein band 4.1 like 2 (Fragment)	Epb41l2	A0A1W2P8C0;B6ZHC5;B6ZHC7;Q80UE4;Q80UE5;Q811C0;Q9EPM7;Q9EPM8	A0A1W2P8C0;B6ZHC5;B6ZHC7;Q80UE4;Q80UE5;Q811C0;Q9EPM7;Q9EPM8	Epb41l2	Erythrocyte membrane protein band 4.1 like 2 (Fragment)	A0A1W2P8C0_MOUSE;B6ZHC5_MOUSE;B6ZHC7_MOUSE;Q80UE4_MOUSE;Q80UE5_MOUSE;Q811C0_MOUSE;Q9EPM7_MOUSE;Q9EPM8_MOUSE	1	5999.03	4564.25	4982.92	8131.67	5524.39	3975.81	4786.99	5360.7
A0A1Y7VM45	Pre-mRNA processing factor 39 (Fragment)	Prpf39	A0A1Y7VM45;A0PJ46;E9QJV4	A0A1Y7VM45;A0PJ46;E9QJV4	Prpf39	Pre-mRNA processing factor 39 (Fragment)	A0A1Y7VM45_MOUSE;A0PJ46_MOUSE;E9QJV4_MOUSE	1	9622.57	6256.41	7838.72	5183.49	3729.44	8271.84	6564.64	4763.32
A0A1Y7VME9	Kinase D-interacting substrate 220	Kidins220	A0A1Y7VME9;A0A1Y7VMH7;B2RXL7;E9Q9B7	A0A1Y7VME9;A0A1Y7VMH7;A0A1Y7VNF8;B2RXL7;E9Q9B7;Q3V2X2;Q80SX9;Q80TG7	Kidins220	Kinase D-interacting substrate 220	A0A1Y7VME9_MOUSE;A0A1Y7VMH7_MOUSE;B2RXL7_MOUSE;E9Q9B7_MOUSE	14	8064	7988.19	9812.19	7181.6	7517.13	7694.13	7946.09	7590.67
A0A1Y7VMP7	MutL homolog 3	Mlh3	A0A1Y7VMP7;Q3TRU3;Q3V1X3;Q68FG1;Q8BZC3	A0A1Y7VMP7;Q3TRU3;Q3V1X3;Q68FG1;Q8BZC3	Mlh3	MutL homolog 3	A0A1Y7VMP7_MOUSE;Q3TRU3_MOUSE;Q3V1X3_MOUSE;Q68FG1_MOUSE;Q8BZC3_MOUSE	1	13253.2	14411.2	13125.8	17231.1	15881.2	16277.7	14936.2	19331.2
A0A1Y7VNG3	Myosin XVB	Myo15b	A0A1Y7VNG3;I7HPW8	I7HPW8;A0A0J9YV02;A0A1Y7VNG3;F6V1P1;Q69ZA4	Myo15b	Myosin XVB	A0A1Y7VNG3_MOUSE;I7HPW8_MOUSE	16	12188.3	12641.7	14284.5	12784.1	12525.7	11550.9	11882.1	10669.5
A0A1Z3MI45	Ifi204	Ifi204	A0A1Z3MI45	P0DOV1;A0A1Z3MI45	Ifi204	Ifi204	A0A1Z3MI45_MOUSE	1	12813.4	11408.5	16001.3	15908.7	16180.3	18801.2	14072.7	11048.2
A0A286YCF2	LIM and senescent cell antigen like domains 2 (Fragment)	Lims2	A0A286YCF2;A0A3Q4EC95	A0A286YCF2;A0A3Q4EC95	Lims2	LIM and senescent cell antigen like domains 2 (Fragment)	A0A286YCF2_MOUSE;A0A3Q4EC95_MOUSE	2	1929.04	3116.19	2041.7	3486.89	7863.76	6132.01	6055.42	5622.72
A0A286YCG7	Sodium-dependent phosphate transport protein 2A (Fragment)	Slc34a1	A0A286YCG7;Q8C012;Q9D2V6	Q9D2V6;A0A286YCG7;Q8C012	Slc34a1	Sodium-dependent phosphate transport protein 2A (Fragment)	A0A286YCG7_MOUSE;Q8C012_MOUSE;Q9D2V6_MOUSE	1	7156.96	13913.2	10578	8937.9	7907.48	7627.83	6755.04	9017.58
A0A286YCV9	Kinesin family member 13B	Kif13b	A0A286YCV9;E9Q4K7	A0A286YCV9;E9Q4K7;Q6A029	Kif13b	Kinesin family member 13B	A0A286YCV9_MOUSE;E9Q4K7_MOUSE	33	25025.9	24701	24414.1	26263.7	24114.3	22509	23477	24508.6
A0A286YCX6	Trafficking protein particle complex 8	Trappc8	A0A286YCX6	A0A286YCX6;E9PY51;Q8BJI6	Trappc8	Trafficking protein particle complex 8	A0A286YCX6_MOUSE	28	14910.5	14762.7	15213.6	15803.7	14357.1	15087.6	14368.2	15036.9
A0A286YDI8	SEC24 homolog C, COPII coat complex component	Sec24c	A0A286YDI8;G3X972;Q3V222;Q80U83	A0A286YDI8;G3X972;Q3V222;Q80U83;Q8CGF4;Q8R2V9	Sec24c	SEC24 homolog C, COPII coat complex component	A0A286YDI8_MOUSE;G3X972_MOUSE;Q3V222_MOUSE;Q80U83_MOUSE	29	41477.8	40558.8	43953.8	37870.4	39456.2	44171.9	42520.6	41007.9
A0A2I3BPN6	TATA-box binding protein associated factor 4	Taf4	A0A2I3BPN6;E9QAP7;Q91WW6	E9QAP7;A0A2I3BPN6;Q91WW6	Taf4	TATA-box binding protein associated factor 4	A0A2I3BPN6_MOUSE;E9QAP7_MOUSE;Q91WW6_MOUSE	3	3425.35	2883.94	3049.18	2930.24	3406.92	2867.57	3078.5	3854.01
A0A2I3BQE1	Expressed sequence AI182371	AI182371	A0A2I3BQE1;A0A2I3BRQ1;A2AS37;Q505K6;Q8BWN9;Q8BWS8	A0A2I3BRQ1;A2AS37;Q14BD9;Q8BWN9;Q8BWS8;A0A2I3BQE1;Q505K6	AI182371	Expressed sequence AI182371	A0A2I3BQE1_MOUSE;A0A2I3BRQ1_MOUSE;A2AS37_MOUSE;Q505K6_MOUSE;Q8BWN9_MOUSE;Q8BWS8_MOUSE	5	5474.47	4774.02	4833.36	7911.55	6856.15	6044.01	5588.79	6201.19
A0A2I3BQG3	Signal peptidase complex subunit 1	Spcs1	A0A2I3BQG3;A0A2I3BRW0	A0A2I3BQG3;A0A2I3BRW0	Spcs1	Signal peptidase complex subunit 1	A0A2I3BQG3_MOUSE;A0A2I3BRW0_MOUSE	4	7794.99	6849.24	9287.72	9301.88	8576.74	8022.94	8527.07	8701.24
A0A2I3BQS8	Predicted gene, 55359	Gm55359	A0A2I3BQS8	A0A2I3BQS8	Gm55359	Predicted gene, 55359	A0A2I3BQS8_MOUSE	2	5752.12	7711.93	4502.52	6410.19	6025.75	6168.32	7303.74	6254.75
A0A2I3BQU5	SR-related CTD-associated factor 11	Scaf11	A0A2I3BQU5;E9PZM7;Q6ZPE9;Q9CSS1	A0A2I3BQU5;E9PZM7;Q6ZPE9;Q9CSS1	Scaf11	SR-related CTD-associated factor 11	A0A2I3BQU5_MOUSE;E9PZM7_MOUSE;Q6ZPE9_MOUSE;Q9CSS1_MOUSE	2	5396.04	5634.36	7105.29	6630.94	5893.35	5713.01	7347.57	6925.12
A0A2I3BR81	5'-nucleotidase domain containing 2	Nt5dc2	A0A2I3BR81;A0A2I3BRL0	A0A2I3BR81;A0A2I3BQR1;A0A2I3BRL0;Q91X76;Q9CY30	Nt5dc2	5'-nucleotidase domain containing 2	A0A2I3BR81_MOUSE;A0A2I3BRL0_MOUSE	9	12819.9	11376.1	10956.4	11613.6	12306.5	10768.5	11268.8	11296.5
A0A2I3BRM6	Heterogeneous nuclear ribonucleoprotein C (Fragment)	Hnrnpc	A0A2I3BRM6	A0A2I3BRM6	Hnrnpc	Heterogeneous nuclear ribonucleoprotein C (Fragment)	A0A2I3BRM6_MOUSE	1		911.128	749.924	2051.52	1653.95		1241.09	1147.24
A0A2P9DUN6	Serpina1 DOM-7	Serpina1d	A0A2P9DUN6	A0A2P9DUN6	Serpina1d	Serpina1 DOM-7	A0A2P9DUN6_MOUSE	1	12119.8		13201.6	12139.8	7147.42	12482.8	9025.02	10309
A0A2R8VHC0	Alpha-galactosidase (Fragment)	Naga	A0A2R8VHC0;A0A2R8VHU7	A0A2R8VHC0;A0A2R8VHU7	Naga	Alpha-galactosidase (Fragment)	A0A2R8VHC0_MOUSE;A0A2R8VHU7_MOUSE	1	29613.9	30254.6	36374.3	32976.6	68205	76049.1	84593.3	89401.5
A0A2R8VHF9	Myosin-11	Myh11	A0A2R8VHF9	A0A2R8VHF9	Myh11	Myosin-11	A0A2R8VHF9_MOUSE	1	4396.64	5308.84	4291.16	4428.79	5055.14	5903.89	3338.56	6896.96
A0A2R8VHH6	Receptor-type tyrosine-protein phosphatase F (Fragment)	Ptpra	A0A2R8VHH6;Q91V35	Q91V35;A0A2R8VHH6	Ptpra	Receptor-type tyrosine-protein phosphatase F (Fragment)	A0A2R8VHH6_MOUSE;Q91V35_MOUSE	1	41363.4	52029	45500	38614.5	31808.1	29087.1	36779.3	38534.3
A0A2R8VHM0	Potassium channel tetramerisation domain containing 17 (Fragment)	Kctd17	A0A2R8VHM0;A0A2R8VKL1;A6H697;E0CYD2;E0CYQ0;E0CZ97;F7B6A4;F7C1U0	E0CYQ0;A0A2R8VHM0;A0A2R8VKL1;A6H697;E0CYD2;E0CZ97;F7B6A4;F7C1U0	Kctd17	Potassium channel tetramerisation domain containing 17 (Fragment)	A0A2R8VHM0_MOUSE;A0A2R8VKL1_MOUSE;A6H697_MOUSE;E0CYD2_MOUSE;E0CYQ0_MOUSE;E0CZ97_MOUSE;F7B6A4_MOUSE;F7C1U0_MOUSE	1	2041.47	1427.13	904.139	1595.28	1188.49	1391.13	1397.62	1692.67
A0A2R8VHX1	NADH:ubiquinone oxidoreductase subunit A6 (Fragment)	Ndufa6	A0A2R8VHX1	A0A2R8VHX1	Ndufa6	NADH:ubiquinone oxidoreductase subunit A6 (Fragment)	A0A2R8VHX1_MOUSE	1	2036.2	3375.93	1911.25	3082.32	1248.21	1488.07	1205.26	1405.6
A0A2R8VI94	CD47 antigen (Rh-related antigen, integrin-associated signal transducer)	Cd47	A0A2R8VI94	A0A2R8VI94	Cd47	CD47 antigen (Rh-related antigen, integrin-associated signal transducer)	A0A2R8VI94_MOUSE	1	3564.36	5304.77	8106.83	5867.61	4277.37	3112.27	3488.62	5152.66
A0A2R8VJW0	Aconitase 2, mitochondrial (Fragment)	Aco2	A0A2R8VJW0	A0A2R8VJW0	Aco2	Aconitase 2, mitochondrial (Fragment)	A0A2R8VJW0_MOUSE	3	34022.1	44870.7	45697.1	34917.6	25749.3	34258.6	27586.8	43032.1
A0A2S0DFF8	Anti-HIV fusion peptide monocolonal anitbody heavy chain vFP1.01 (Fragment)		A0A2S0DFF8;K7U695;U5LP42	A0A2S0DFF8;K7U695;U5LP42		Anti-HIV fusion peptide monocolonal anitbody heavy chain vFP1.01 (Fragment)	A0A2S0DFF8_MOUSE;K7U695_MOUSE;U5LP42_MOUSE	1	5377.94	3372.76	2844.46	2447.17
A0A2Z4SY15	MHC class II antigen K (Fragment)	H2-K1	A0A2Z4SY15	P01897;P01899;A0A286R3P2;A0A482D1Q0;G3UZP7;O78206;O78207;Q31145;Q31151;Q31167;Q31168;Q3KQJ3;Q61641;Q61643;Q792Z7;Q8R3Y0;W5XQG0;A0A2Z4SXR4;A0A2Z4SXR9;A0A2Z4SXW8;A0A2Z4SY15;A0A2Z4SYR2;K7X379	H2-K1	MHC class II antigen K (Fragment)	A0A2Z4SY15_MOUSE	3	52095.1	41563.9	58433.1	50605.4	108889	74854.3	80725.7	63971.7
A0A338P695	Sphingomyelin phosphodiesterase 4	Smpd4	A0A338P695;A0A338P6S3;A0A338P7L1	A0A338P695;A0A338P6S3;A0A338P7L1	Smpd4	Sphingomyelin phosphodiesterase 4	A0A338P695_MOUSE;A0A338P6S3_MOUSE;A0A338P7L1_MOUSE	1	3838.46	2596.13	3307.01	2889.86	4354.07	4556.19	3142.44	3791.42
A0A338P6G6	High mobility group protein HMG-I/HMG-Y	Hmga1	A0A338P6G6;A0A384DV79	A0A338P6G6;A0A384DV79;Q3TVP0	Hmga1	High mobility group protein HMG-I/HMG-Y	A0A338P6G6_MOUSE;A0A384DV79_MOUSE	1	2929.75	2908.92	2988.56	2970.52	2260.96	3921.63	2340.27	2628.5
A0A338P6K2	Myosin-11	Myh11	A0A338P6K2	A0A338P6K2;A0A2R8VHF9;E9QPE7;Q69ZX3	Myh11	Myosin-11	A0A338P6K2_MOUSE	5	37787.2	49755.2	33549.6	39175.9	39153.4	44298.1	40095.8	48357.6
A0A338P6S8	ABI family member 3 binding protein	Abi3bp	A0A338P6S8;Q59IW6	A0A338P6S8;Q59IW6;Q8BUA2	Abi3bp	ABI family member 3 binding protein	A0A338P6S8_MOUSE;Q59IW6_MOUSE	6	7274.26	4130.17	9678.28	9860.58	11132.9	11429.6	8092.76	9848.07
A0A338P7C9	Transmembrane protein 181A	Tmem181a	A0A338P7C9;B2RVR2;Q3TM85;Q3U3W2	A0A338P7C9;B2RVR2;Q3TM85;Q3U3W2	Tmem181a;Tmem181b-ps	Transmembrane protein 181A	A0A338P7C9_MOUSE;B2RVR2_MOUSE;Q3TM85_MOUSE;Q3U3W2_MOUSE	1	1233.63	2004.11	1685.26	1190.61	1331.21	3264.95	3204.67	2403.69
A0A345IT93	Envelope polyprotein (Fragment)	env	A0A345IT93	A0A0A0U6W1;A0A345IT91;A0A345IT93	env	Envelope polyprotein (Fragment)	A0A345IT93_MOUSE	9	13426.3	20286.5	15840.8	13947.3	16126.1	12254.8	19059.7	17335.7
A0A3B2W820	Ribosomal protein L10A	Rpl10a	A0A3B2W820;A0A3B2W824;A0A3B2WBL1;A0A3B2WDD2;Q3U561;Q5XJF6	A0A3B2WBL1;A0A3B2WDD2;Q3U561;Q5XJF6;A0A3B2W820;A0A3B2W824	Rpl10a	Ribosomal protein L10A	A0A3B2W820_MOUSE;A0A3B2W824_MOUSE;A0A3B2WBL1_MOUSE;A0A3B2WDD2_MOUSE;Q3U561_MOUSE;Q5XJF6_MOUSE	1	28532.9	30761.3	32374	27327.9	31379.8	36864.5	32254.4	33555.6
A0A3B2WBE1	Erythrocyte membrane protein band 4.1 like 3 (Fragment)	Epb41l3	A0A3B2WBE1	A7YY80;A0A286YD84;A0A3B2WBE1;V6BQR3	Epb41l3	Erythrocyte membrane protein band 4.1 like 3 (Fragment)	A0A3B2WBE1_MOUSE	3	4486.01	4708.27	3443.22	3009.44	5011.89	4770.88	6070.76	5038.41
A0A3Q4L309	cDNA sequence BC004004	BC004004	A0A3Q4L309	Q99KU6;A0A3Q4L309;A0A3Q4L387;Q3UAK7	BC004004	cDNA sequence BC004004	A0A3Q4L309_MOUSE	2	3372.18	5490.81	4980.9	4275.73	4888.01	4241.32	2773.25	4378.32
A0A411P8U6	Myelin basic protein (Fragment)	Mbp	A0A411P8U6	A0A411P8U6	Mbp	Myelin basic protein (Fragment)	A0A411P8U6_MOUSE	1					1957.19			8333.98
A0A494B9V8	Protein prenyltransferase alpha subunit repeat containing 1	Ptar1	A0A494B9V8	A0A494B9V8	Ptar1	Protein prenyltransferase alpha subunit repeat containing 1	A0A494B9V8_MOUSE	5	7219.54	8085.52	7375.08	7752.66	8121.58	7538.19	7101.01	7136.3
A0A494BB10	Asnsd1 upstream reading frame	Asdurf	A0A494BB10	A0A494BB10	Asdurf	Asnsd1 upstream reading frame	A0A494BB10_MOUSE	5	5474.25	5713.04	6664.96	6332.65	5739.37	8736.17	6447.54	6817.51
A0A494BBE3	Receptor accessory protein 5 (Fragment)	Reep5	A0A494BBE3;G3X8R0;Q5QGU0;Q921E4;Q9CQG4	G3X8R0;Q5QGU0;Q921E4;Q9CQG4;A0A494BBE3	Reep5	Receptor accessory protein 5 (Fragment)	A0A494BBE3_MOUSE;G3X8R0_MOUSE;Q5QGU0_MOUSE;Q921E4_MOUSE;Q9CQG4_MOUSE	3	18105.8	9532.58	16178.3	15785.7	16881.5	13112	15229.8	12436.2
A0A494BBK2	Ras homolog family member T1 (Fragment)	Rhot1	A0A494BBK2;Q7TPW0	A0A494BBK2;Q7TPW0	Rhot1	Ras homolog family member T1 (Fragment)	A0A494BBK2_MOUSE;Q7TPW0_MOUSE	1	3612.11	2760.33	2772.26	2588.25	2141.76	2636.65	2109.78	4158.99
A0A571BEI2	AP2 associated kinase 1 (Fragment)	Aak1	A0A571BEI2	Q6PIU9;A0A571BEI2	Aak1	AP2 associated kinase 1 (Fragment)	A0A571BEI2_MOUSE	6	8635.49	6791.86	6664.79	7908.63	8210.49	9297.9	9177.71	8992.8
A0A571BF69	Maltase-glucoamylase	Mgam	A0A571BF69	A0A0J9YVE6;A0A0J9YVJ0;A0A571BDS5;A0A571BF69;B5THE2	Mgam	Maltase-glucoamylase	A0A571BF69_MOUSE	34	16910.2	22033.5	19401.7	14049.8	22873.5	24483.4	24506.2	20489.9
A0A571BG95	Active breakpoint cluster region-related protein	Abr	A0A571BG95	A0A571BG95	Abr	Active breakpoint cluster region-related protein	A0A571BG95_MOUSE	2	1503.72	1406.96	1621.95	1241.87	2155.91	1963.94	1835.79	1830.89
A0A5F8MP88	Kielin/chordin-like protein (Fragment)	Kcp	A0A5F8MP88;Q6PB40	A0A5F8MP88;Q6PB40	Kcp	Kielin/chordin-like protein (Fragment)	A0A5F8MP88_MOUSE;Q6PB40_MOUSE	1			10387.9			10440.9
A0A5F8MPB8	CCR4-NOT transcription complex subunit 10 (Fragment)	Cnot10	A0A5F8MPB8	A0A5F8MPB8	Cnot10	CCR4-NOT transcription complex subunit 10 (Fragment)	A0A5F8MPB8_MOUSE	1	35426.3	62739.3	46012.6	52011.2	43220.9	41413.9	45357.3	38601.2
A0A5F8MPH8	Tenascin XB	Tnxb	A0A5F8MPH8	A0A5F8MPH8;E9Q2T3;O35452;Q3V5L4;A0A571BG59;O54796	Tnxb	Tenascin XB	A0A5F8MPH8_MOUSE	40	24907.1	42339.5	30232	26365.3	33591	37945.7	35232.1	33801.2
A0A5F8MPI9	Rap guanine nucleotide exchange factor (GEF) 1	Rapgef1	A0A5F8MPI9;A1L338;Q3UGX8;Q3UHC1;Q91ZZ2	Q3UHC1;Q8C5V7;Q91ZZ2;A0A5F8MPI9;A1L338;F6ZDE5;Q3UGX8	Rapgef1	Rap guanine nucleotide exchange factor (GEF) 1	A0A5F8MPI9_MOUSE;A1L338_MOUSE;Q3UGX8_MOUSE;Q3UHC1_MOUSE;Q91ZZ2_MOUSE	2	2981.22	2970.69	2526.84	3611.38	2316.44	4597.88	2979.01	3929.05
A0A5F8MPM4	Myelin protein P0	Mpz	A0A5F8MPM4;E9QK82	A0A5F8MPM4;E9QK82	Mpz	Myelin protein P0	A0A5F8MPM4_MOUSE;E9QK82_MOUSE	1	2681.19
A0A5F8MPP0	Pleckstrin homology domain containing, family G (with RhoGef domain) member 1	Plekhg1	A0A5F8MPP0;F6S200;F7C583;Q148U4;Q148U5;Q3UX37;Q80TH7	A0A5F8MPP0;F6S200;F7C583;Q148U4;Q148U5;Q3UX37;Q6DFV4;Q80TH7	Plekhg1	Pleckstrin homology domain containing, family G (with RhoGef domain) member 1	A0A5F8MPP0_MOUSE;F6S200_MOUSE;F7C583_MOUSE;Q148U4_MOUSE;Q148U5_MOUSE;Q3UX37_MOUSE;Q80TH7_MOUSE	3	2409.18	3116.03	3266.87	3574.54	2359.57	2781.55	3709.2	2410.75
A0A5F8MPT3	Rap guanine nucleotide exchange factor (GEF) 6	Rapgef6	A0A5F8MPT3;B2RUJ6;Q5NCJ0;Q5NCJ1;Q5NCJ4;Q5NCJ5	Q5NCJ1;A0A5F8MPT3;B2RUJ6;Q3TKC6;Q5NCJ0;Q5NCJ4;Q5NCJ5;Q8BLC8;Q8BX14;A0A1W2P734;Q3TPI6;Q5NCJ2	Rapgef6	Rap guanine nucleotide exchange factor (GEF) 6	A0A5F8MPT3_MOUSE;B2RUJ6_MOUSE;Q5NCJ0_MOUSE;Q5NCJ1_MOUSE;Q5NCJ4_MOUSE;Q5NCJ5_MOUSE	1	1441.37			1517.25	1051.05	1326.82	2113.53	1068.77
A0A5F8MPT6	Cingulin	Cgn	A0A5F8MPT6;D3YUW7;E9QMC1	A0A5F8MPT6;D3YUW7;E9QMC1	Cgn	Cingulin	A0A5F8MPT6_MOUSE;D3YUW7_MOUSE;E9QMC1_MOUSE	1	9304.75	8250.49	9279.39	7609.62	6181.18	8594.09	7587.16	8280.43
A0A668KL97	HECT, UBA and WWE domain containing 1 (Fragment)	Huwe1	A0A668KL97;Q3TMX4;Q3TNP1	A0A668KL97;Q3TMX4;Q3TNP1	Huwe1	HECT, UBA and WWE domain containing 1 (Fragment)	A0A668KL97_MOUSE;Q3TMX4_MOUSE;Q3TNP1_MOUSE	1	3292.13	7138.03	4742.84	4071.69	3551.34	3772.82	5669.84	3406.07
A0A6I8MWZ8	Metaxin-1	Mtx1	A0A6I8MWZ8;D3YVW0;D3Z3F4;G3UXX9;G3XA66;Q8R5C0	A0A6I8MWZ8;D3YVW0;D3Z3F4;G3XA66;Q8R5C0;G3UXX9	Mtx1	Metaxin-1	A0A6I8MWZ8_MOUSE;D3YVW0_MOUSE;D3Z3F4_MOUSE;G3UXX9_MOUSE;G3XA66_MOUSE;Q8R5C0_MOUSE	1	64985.5	97312.3	89864.8	71859.9	68438.3	58621.1	64921.8	81897.7
A0A7H1MFL8	ABPA2	Abpa2	A0A7H1MFL8;A0A7S8ZXD3;O35176	O35176;A0A7H1MFL8;A0A7S8ZXD3;A0A7T3UXR9	Abpa2;Scgb1b2	ABPA2	A0A7H1MFL8_MUSMC;A0A7S8ZXD3_MOUSE;O35176_MOUSE	1	1160.72	899.027		2147.06	1633.13	4080.92	3190.45	3150.72
A0A7H1MFM4	ABPA7	Abpa7	A0A7H1MFM4;A0A7S8WJU1;A0A7T3QYU4;D2XZ31;E9PWZ2	D2XZ31;E9PWZ2;A0A087WQJ0;A0A7H1MFM1;A0A7H1MFM2;A0A7H1MFM4;A0A7S8WJT9;A0A7S8WJU1;A0A7T3QYS8;A0A7T3QYU4;A0A7T3QYV0	Abpa7;Apbp7;Scgb1b20;Scgb1b29	ABPA7	A0A7H1MFM4_MUSMC;A0A7S8WJU1_MOUSE;A0A7T3QYU4_MOUSE;D2XZ31_MOUSE;E9PWZ2_MOUSE	3	4002.1	7076.46	7310.61	14923.3	13289.9	10050.7	15464.6	10247.8
A0A7N9VR94	AHNAK nucleoprotein 2	Ahnak2	A0A7N9VR94	A0A7N9VR94	Ahnak2	AHNAK nucleoprotein 2	A0A7N9VR94_MOUSE	9	37741.3	20045	27100.5	39715.3	80936.4	79882.2	74173.9	64783.5
A0A7N9VSG0	ATPase family gene 2 protein homolog B	Afg2b	A0A7N9VSG0	A0A7N9VSG0;Q3TER3	Afg2b	ATPase family gene 2 protein homolog B	AFG2B_MOUSE	1	9775.35	13169.8	9774.88	11872.6	10400.4	10513.3	11782.9	11569
A0A978W7D6	Anti-V3 immunglobulin heavy chain (Fragment)		A0A978W7D6	A0A978W7D6		Anti-V3 immunglobulin heavy chain (Fragment)	A0A978W7D6_MOUSE	1	33896	24873.4	28040.8	35377.9		31138.6	33286.7
A0A991EKZ2	FMR1 autosomal homolog 2	Fxr2	A0A991EKZ2;Q3TA75	A0A991EKZ2;Q3TA75	Fxr2	FMR1 autosomal homolog 2	A0A991EKZ2_MOUSE;Q3TA75_MOUSE	3	15009.5	8815.93	9055.09	10598.9	16185.3	13141.2	14476.9	14236.9
A0A991ENW0	H1.10 linker histone	H1f10	A0A991ENW0;Q80ZM5	A0A991ENW0;Q80ZM5	H1f10	H1.10 linker histone	A0A991ENW0_MOUSE;Q80ZM5_MOUSE	2	6823.46	4835.32	4518.3	6593.06	4870.74	4900.72	4329.04	4948.28
A0A9L6KDR8	Acyl-Coenzyme A binding domain containing 4 (Fragment)	Acbd4	A0A9L6KDR8;A0A9L6KE81;A2AHR2;Q80X94;Q8BV75;Q8C1P3	A0A9L6KDR8;A0A9L6KE81;A2AHR2;Q80X94;Q8BV75;Q8C1P3	Acbd4	Acyl-Coenzyme A binding domain containing 4 (Fragment)	A0A9L6KDR8_MOUSE;A0A9L6KE81_MOUSE;A2AHR2_MOUSE;Q80X94_MOUSE;Q8BV75_MOUSE;Q8C1P3_MOUSE	1	583.376	1007.18	620.355	1479.25	329.151	865.785	1451.63
A0AA50Q9H5	Ig Kappa light chain (Fragment)	25E2	A0AA50Q9H5	P01654;P01656;A0AA50Q9H5	25E2	Ig Kappa light chain (Fragment)	A0AA50Q9H5_MOUSE	1	34839.5	6081.23	15993.1	6896.27	8620.66	10332.7	27690.4	17249
A0AA74KT89	Predicted gene 8220	Gm17078	A0AA74KT89;F7D8Y4;K7N6U8;M0QW51;M0QWQ9	A0AA74KT89;F7D8Y4;K7N6U8;M0QW51;M0QWQ9	Gm17078;Gm17079;Gm17174;Gm8094;Gm8220	Predicted gene 8220	A0AA74KT89_MOUSE;F7D8Y4_MOUSE;K7N6U8_MOUSE;M0QW51_MOUSE;M0QWQ9_MOUSE	1	7809.67	9074.71	8331.06	10418.7	7479.24	11247.1	8499.73	11233.8
A0AA74KTG5	Zinc finger protein 384	Zfp384	A0AA74KTG5;D3YX49;E9Q1A5;E9QAR1;E9QAR4;E9QAR6;Q3U1E7;Q6P3F1	A0AA74KTG5;D3YX49;E9Q1A5;E9QAR1;E9QAR4;E9QAR6;Q3U1E7;Q6P3F1	Zfp384	Zinc finger protein 384	A0AA74KTG5_MOUSE;D3YX49_MOUSE;E9Q1A5_MOUSE;E9QAR1_MOUSE;E9QAR4_MOUSE;E9QAR6_MOUSE;Q3U1E7_MOUSE;Q6P3F1_MOUSE	2	6348.88	2616.5	3836.91	3530.57	5347.8	3540.58	2802.95	3863.8
A0AAA9WW07	A-kinase anchor protein 17A	Akap17a	A0AAA9WW07	A0AAA9WW07	Akap17a	A-kinase anchor protein 17A	A0AAA9WW07_MOUSE	1	3846.79		4869.66	5026.5	3750.58	3539.39	3919.77	4271.3
A0AAQ4VMU7	Smoothelin	Smtn	A0AAQ4VMU7;D3Z3Q3;Q9D7A0	A0AAQ4VMU7;D3Z3Q3;Q9D7A0	Smtn	Smoothelin	A0AAQ4VMU7_MOUSE;D3Z3Q3_MOUSE;Q9D7A0_MOUSE	1	9953.66	7458.56	9721.39	9535.89	8125.92	11331	8386.9	8791.22
A0AAQ4VMW3	LIM domain only 7	Lmo7	A0AAQ4VMW3;A0T1J8;E9PYF4	E9PYF4;A0AAQ4VMV9;A0AAQ4VMW3;A0AAQ4VMW6;A0T1J8;B7ZN52;E9PYI7;F6TFN2;F6VG99;Q6ZQ32	Lmo7	LIM domain only 7	A0AAQ4VMW3_MOUSE;A0T1J8_MOUSE;E9PYF4_MOUSE	14	18510.8	20813.7	17892.2	17468.7	21355.8	18619.6	19890.5	19519.6
A0AAQ4VMW9	Solute carrier family 35 member A4		A0AAQ4VMW9	A0AAQ4VMW9		Solute carrier family 35 member A4	A0AAQ4VMW9_MOUSE	2	1862.9	2675.44	1498.73	2100.32		834.675	1093.47	1420.31
A0AAQ4VMX2	Complement C4A (Rodgers blood group)	C4a	A0AAQ4VMX2;B9EIU2;V9GZK9;V9GZQ6	A0AAQ4VMX2;B9EIU2;V9GZG9;V9GZJ5;V9GZQ6;Q62237;V9GZK9	C4a;Slp	Complement C4A (Rodgers blood group)	A0AAQ4VMX2_MOUSE;B9EIU2_MOUSE;V9GZK9_MOUSE;V9GZQ6_MOUSE	1			3987.07	3199.87	6569.78	4012.58	5958.25
A0AUM9	Translation initiation factor eIF2B subunit gamma	Eif2b3	A0AUM9;A4FUS0;B1AUN2	A0AUM9;A4FUS0;B1AUN2;B1AUN3;Q3UKV0	Eif2b3	Translation initiation factor eIF2B subunit gamma	A0AUM9_MOUSE;A4FUS0_MOUSE;B1AUN2_MOUSE	12	14299.3	15479.7	15015.2	16640.1	15804.4	14611.3	14400	14746.9
A0AUN0	Sec23ip protein (Fragment)	Sec23ip	A0AUN0;G3X928;Q3UY74;Q4G0C0	A0AUN0;G3X928;Q3UY74;Q4G0C0	Sec23ip	Sec23ip protein (Fragment)	A0AUN0_MOUSE;G3X928_MOUSE;Q3UY74_MOUSE;Q4G0C0_MOUSE	1	844.121		801.702		1215.53
A0JNU3	60 kDa lysophospholipase	Aspg	A0JNU3	A0JNU3	Aspg	60 kDa lysophospholipase	LPP60_MOUSE	3	3022.22	4304.08	3998.74	2956.28	2735.28	2638.11	2974.09	1998.88
A0PJK9	Protein Njmu-R1	5730455P16Rik	A0PJK9	Q9CYI0;A0PJK9;B1AQG3;Q3TUY5	5730455P16Rik	Protein Njmu-R1	A0PJK9_MOUSE	7	6015.65	4844.36	4890.01	4376.45	4553.1	5463.38	4665.16	5414.66
A0PJN6	2310061I04Rik protein (Fragment)	2310061I04Rik	A0PJN6;B8JJ66;B8JJ69;Q3TA61;Q3UM69;Q497V8	A0PJN6;B8JJ66;B8JJ67;B8JJ69;F6X1P1;Q3TA61;Q3UM69;Q497V8	2310061I04Rik	2310061I04Rik protein (Fragment)	A0PJN6_MOUSE;B8JJ66_MOUSE;B8JJ69_MOUSE;Q3TA61_MOUSE;Q3UM69_MOUSE;Q497V8_MOUSE	2	3647.14	5337.98	3206.1	3607.48	2726.53	3060.22	4144.21	2023.18
A0ZVB6	TBP-associated factor 170	Btaf1	A0ZVB6;E9QAE3	A0ZVB6;E9QAE3;Q52KH4;Q8BTS9	Btaf1	TBP-associated factor 170	A0ZVB6_MOUSE;E9QAE3_MOUSE	11	7703.73	8568.9	9650.07	10033.2	8505.72	9195.55	7761.17	8552.03
A1A4T2	Alpha glucosidase 2 alpha neutral subunit	Ganab	A1A4T2;Q3UE86	A1A4T2;Q3UE86;Q9R1N7	Ganab	Alpha glucosidase 2 alpha neutral subunit	A1A4T2_MOUSE;Q3UE86_MOUSE	1	7197.55	10369.6	8395.43	9087.34	10170.2	11681.4	8541.62	13411.9
A1A535	Ventricular zone-expressed PH domain-containing protein 1	Veph1	A1A535	A1A535	Veph1	Ventricular zone-expressed PH domain-containing protein 1	MELT_MOUSE	1	3257.97	4615.66	3396.32	1823.47		1792.43		2510.63
A1A5B6	TBC1 domain family member 25	Tbc1d25	A1A5B6	A1A5B6;A0A6I8MX15;A2BD48;A2VCT6;E9PWX7;S4R2S6	Tbc1d25	TBC1 domain family member 25	TBC25_MOUSE	3	6470.44	7268.14	6167.4	6872.86	6456.51	6741.26	5487.91	5051.47
A1BN54	Alpha-actinin-1	Actn1	A1BN54	A1BN54	Actn1	Alpha-actinin-1	A1BN54_MOUSE	5	50227.9	35565.7	45055.8	48352.9	38667.5	42067.6	43041.5	35034.9
A1E5L0	Cytokine-like 1	Cytl1	A1E5L0;Q0VG51;Q6P536	A1E5L0;Q0VG51;Q6P536	Cytl1	Cytokine-like 1	A1E5L0_MOUSE;Q0VG51_MOUSE;Q6P536_MOUSE	4	3308.05	3601.89	5445.19	2751.53	13932.3	15128.5	12786.8	15231.1
A1L0X5	Krt78 protein (Fragment)	Krt78	A1L0X5;E9Q0F0;Q0VDM9;Q0VDN0;Q6IFT3	A1L0X5;E9Q0F0;Q0VDM9;Q0VDN0;Q6IFT3	Krt78	Krt78 protein (Fragment)	A1L0X5_MOUSE;E9Q0F0_MOUSE;Q0VDM9_MOUSE;Q0VDN0_MOUSE;Q6IFT3_MOUSE	3	37137.6	18509.5	14671.3	28565.3	128872	9382.11	24275.3	57061.9
A1L314	Macrophage-expressed gene 1 protein	Mpeg1	A1L314	A1L314;A0AAQ4VMR7;E9QN37	Mpeg1	Macrophage-expressed gene 1 protein	MPEG1_MOUSE	18	33040	22618.7	25079.3	23922.9	90228.1	121399	109980	97721.5
A1L3P4	Sodium/hydrogen exchanger 6	Slc9a6	A1L3P4	A1L3P4;B0QZV3;Q80U52;A0A140LJ55	Slc9a6	Sodium/hydrogen exchanger 6	SL9A6_MOUSE	1	2270.97		2860.43	3489.04	2240.62	3593.36	1578.97	2754.93
A1L3S9	Phosphatase and actin regulator	Phactr2	A1L3S9;B1AVN9;B1AVP0;F7D4H5;Q3UQ19;Q91VK6	A1L3S9;B1AVN9;B1AVP0;F7D4H5;Q3UQ19;Q3UTF8;Q91VK6	Phactr2	Phosphatase and actin regulator	A1L3S9_MOUSE;B1AVN9_MOUSE;B1AVP0_MOUSE;F7D4H5_MOUSE;Q3UQ19_MOUSE;Q91VK6_MOUSE	3	4205.75	3391.4	3993.71	5719.06	6326.88	7273.34	7264.48	6096.36
A2A432	Cullin-4B	Cul4b	A2A432	A2A432;Q3TCH7;E9PXY1;E9PXT5;J3QJX0;Q3TLY0;Q3UD60	Cul4b	Cullin-4B	CUL4B_MOUSE	31	19204.4	19725.3	17646.2	16952.3	18952.1	18420.9	20427	19846.7
A2A485	Zinc finger, MYND-type containing 8	Zmynd8	A2A485;Q3U1M7;Q80Y82	A2A484;Q3V1I9;Q80Y82;A2A480;A2A481;A2A482;A2A483;A2A485;E9Q8D1;Q3U1M7;Q3UH28;Q6P4S7;Q80XT8;Q8CHB3	Zmynd8	Zinc finger, MYND-type containing 8	A2A485_MOUSE;Q3U1M7_MOUSE;Q80Y82_MOUSE	8	5860.51	5887.37	5694.66	6213.22	5116.6	6299.64	5899.86	5303.95
A2A4P0	ATP-dependent RNA helicase DHX8	Dhx8	A2A4P0	A2A4P0;A2A4N9;Q3UQQ4;Q5DTN5;Q3TUC8;Q8R214	Dhx8	ATP-dependent RNA helicase DHX8	DHX8_MOUSE	2	3323.79	2932.58	2521.25	3167.74	2710.24	3785.51	3289.13	3842.48
A2A5R2	Brefeldin A-inhibited guanine nucleotide-exchange protein 2	Arfgef2	A2A5R2	A2A5R2;Q3U5C3	Arfgef2	Brefeldin A-inhibited guanine nucleotide-exchange protein 2	BIG2_MOUSE	24	25161.9	23468.2	24407	25408	27560.3	24874.7	25647.2	25826.2
A2A5R8	Staufen double-stranded RNA binding protein 1	Stau1	A2A5R8;A2A5S3;Q3TJ07;Q3TU43;Q3TWA1;Q3TWP5;Q3U7A6;Q3U8D3;Q3UKX3;Q3UTC8;Q641P2;Q6TNG5;Q9DBE7;V9GX87	A2A5S3;Q3TWA1;A2A5R8;Q3TJ07;Q3TU43;Q3TWP5;Q3U7A6;Q3U8D3;Q3UKX3;Q3UTC8;Q641P2;Q6TNG5;Q9DBE7;V9GX87	Stau1	Staufen double-stranded RNA binding protein 1	A2A5R8_MOUSE;A2A5S3_MOUSE;Q3TJ07_MOUSE;Q3TU43_MOUSE;Q3TWA1_MOUSE;Q3TWP5_MOUSE;Q3U7A6_MOUSE;Q3U8D3_MOUSE;Q3UKX3_MOUSE;Q3UTC8_MOUSE;Q641P2_MOUSE;Q6TNG5_MOUSE;Q9DBE7_MOUSE;V9GX87_MOUSE	2	6307	4872.17	5099.58	6111.52	6681.84	4685.82	5482.03	6940.05
A2A5Z6	E3 ubiquitin-protein ligase SMURF2	Smurf2	A2A5Z6	A2A5Z6	Smurf2	E3 ubiquitin-protein ligase SMURF2	SMUF2_MOUSE	7	6614.81	6487.56	6238.95	5544.76	6776.19	7496.8	6015.16	6840.25
A2A654	Bromodomain PHD finger transcription factor	Bptf	A2A654;A2A655;E5D6T0;E9Q6A7	A2A654;A2A655;E5D6T0;E9Q6A7;Q8CFX5	Bptf	Bromodomain PHD finger transcription factor	A2A654_MOUSE;A2A655_MOUSE;E5D6T0_MOUSE;E9Q6A7_MOUSE	2	3161.55	2116.82	3180.25	3193.1	4047.67	2846.96	4589.47	3514
A2A690	Protein TANC2	Tanc2	A2A690	A2A690;F6VCI2;F6VP19	Tanc2	Protein TANC2	TANC2_MOUSE	5		19839.4	12981.2	13999.5	13070	9172.33	10539	12141.5
A2A6H1	LIM and SH3 protein 1 (Fragment)	Lasp1	A2A6H1	A2A6H1	Lasp1	LIM and SH3 protein 1 (Fragment)	A2A6H1_MOUSE	1	11854.7	16087.4	12331.7	12303.3	4247.87	6621.52	5850.89	6720.96
A2A6Q5	Cell division cycle protein 27 homolog	Cdc27	A2A6Q5	A2A6Q5;Q3UYS3;Q8BYJ1;Q8R568	Cdc27	Cell division cycle protein 27 homolog	CDC27_MOUSE	2	3328.82	3608.29	3369.43	4099.24	3695.04	1898.98	2289.97	3563.06
A2A6T1	Cerebellar degeneration-related protein 2-like	Cdr2l	A2A6T1	A2A6T1;B2RWR4;B7ZMV4	Cdr2l	Cerebellar degeneration-related protein 2-like	CDR2L_MOUSE	1	8688.12	6064.87	8341.52	7244.86	7196.63	5450.74	6930.35	3791.98
A2A716	Oxysterol-binding protein	Osbpl7	A2A716;Q3TAX1	A2A716;Q3TAX1;Q5U471	Osbpl7	Oxysterol-binding protein	A2A716_MOUSE;Q3TAX1_MOUSE	2	5802.17	6076.07	6448.87	6240.35	8269.09	5881.45	5378.21	4860.31
A2A7Q9	E3 ubiquitin-protein ligase RNF19B	Rnf19b	A2A7Q9	A2A7Q9;A4VCJ1;E9Q2L7	Rnf19b	E3 ubiquitin-protein ligase RNF19B	RN19B_MOUSE	1			1488.67		1046.37
A2A7S8	NHS-like protein 3	Nhsl3	A2A7S8	A2A7S8	Nhsl3	NHS-like protein 3	NHSL3_MOUSE	4	3650.76	4138.71	4310.96	3462.74	5143.48	5215.43	5128.84	4870.42
A2A848	Peroxisomal acyl-coenzyme A oxidase 1 (Fragment)	Acox1	A2A848	A2A848;Q8C168;Q8BW35	Acox1	Peroxisomal acyl-coenzyme A oxidase 1 (Fragment)	A2A848_MOUSE	1	343.627	1058.66	805.759	1006.77	599.672	1442.78	729.057
A2A863	Integrin beta-4	Itgb4	A2A863	A2A863;A2A864;Q3ULT5;Q3UNP2	Itgb4	Integrin beta-4	ITB4_MOUSE	38	22321.6	16254.6	20334.6	23744	19535.6	22000.2	19295.5	20727
A2A8L5	Receptor-type tyrosine-protein phosphatase F	Ptprf	A2A8L5	A2A8L5;Q64487;B9EJA3;E9PVW8;E9Q7I7;G3UWK6;G3UX60;G3UY75;G3UYU6;A0A1Y7VNR5	Ptprf	Receptor-type tyrosine-protein phosphatase F	PTPRF_MOUSE	39	31227.7	38950.7	34603.4	32680.8	33828.2	36921.3	38000.4	39711.6
A2A8R0	Zinc finger FYVE domain-containing protein	Zfyve9	A2A8R0;A8Y5G5	A2A8R0;A8Y5G5;A0S860;Q6PDX5;Q80XL0	Zfyve9	Zinc finger FYVE domain-containing protein	A2A8R0_MOUSE;A8Y5G5_MOUSE	1	3772.28	2340.35	3199.17	2307.17	2099.56	2873.99	3671.67	3800.33
A2A8U2	Transmembrane protein 201	Tmem201	A2A8U2	A2A8U2;Q3TXY3;Q8C397	Tmem201	Transmembrane protein 201	TM201_MOUSE	6	12886.7	9808.12	11744.5	11838.3	13191	13377.1	14173.5	12761.3
A2A8Z1	Oxysterol-binding protein-related protein 9	Osbpl9	A2A8Z1	A2A8Z1;A0A0A6YXH3;A0A1S6GWJ0;E9PXZ2;E9Q6C1;F6UHR6;Q5FWX7;Q8R0G3;Q99LZ2	Osbpl9	Oxysterol-binding protein-related protein 9	OSBL9_MOUSE	15	19492.9	20460	19486.9	21118	19164.4	19782	16670.3	17018.7
A2A935	Histone-lysine N-methyltransferase PRDM16	Prdm16	A2A935	A2A935;A2A933;Q8BNF5;A2A929;A2A930;A2A931;A2A934	Prdm16	Histone-lysine N-methyltransferase PRDM16	PRD16_MOUSE	1	2887.63	5067.21	1802.62	3834.2	3127.57	3315.53	3442.22	2667.38
A2A9C3	KICSTOR complex protein SZT2	Szt2	A2A9C3	A2A9C3;Q6ZQA5	Szt2	KICSTOR complex protein SZT2	SZT2_MOUSE	4	3247.25	3352.36	3277.79	3064.76	3574.66	3472.34	2359.05	3923.36
A2AAE1	Bridge-like lipid transfer protein family member 1	Bltp1	A2AAE1	A2AAE1;A0A1D5RMC4;Q8CDG7	Bltp1	Bridge-like lipid transfer protein family member 1	BLTP1_MOUSE	4	8078.34	7448.7	7673.45	6764.19	6406.98	6721.98	7858.57	7368.34
A2AAJ9	Obscurin	Obscn	A2AAJ9	A2AAJ9;H7BX05;F6TJX7;Q80UP9	Obscn	Obscurin	OBSCN_MOUSE	1				1069.85
A2AAY5	SH3 and PX domain-containing protein 2B	Sh3pxd2b	A2AAY5	A2AAY5;A0A5F8MPP7;B9EJ37	Sh3pxd2b	SH3 and PX domain-containing protein 2B	SPD2B_MOUSE	9	10649.8	9266.6	10684.2	11929.4	10417.6	10971.8	9493.16	11052.5
A2AB59	Rho GTPase-activating protein 27	Arhgap27	A2AB59	A2AB59;Q3UNZ6	Arhgap27	Rho GTPase-activating protein 27	RHG27_MOUSE	14	26400.6	27618.5	27343.1	25428.5	30524.9	30955.6	31241.6	26895.8
A2ABV5	Mediator of RNA polymerase II transcription subunit 14	Med14	A2ABV5	A2ABV5;A2BDP0	Med14	Mediator of RNA polymerase II transcription subunit 14	MED14_MOUSE	9	8763.44	9372.17	9298.38	9847.5	9671.98	9861.44	8973.03	9244.48
A2ACC6	Ral GTPase activating protein, beta subunit (non-catalytic)	Ralgapb	A2ACC6;B2RRF1;E9Q0J2;F8WHN4	A2ACC6;B2RRF1;E9Q0J2;F8WHN4	Ralgapb	Ral GTPase activating protein, beta subunit (non-catalytic)	A2ACC6_MOUSE;B2RRF1_MOUSE;E9Q0J2_MOUSE;F8WHN4_MOUSE	1	7248.02	5581.72	5975.25	5276.24	5757.61	6364.02	6579.76	6576.41
A2ACQ1	RNA helicase	Dhx35	A2ACQ1;Q8K1G9	A2ACQ1;Q8K1G9	Dhx35	RNA helicase	A2ACQ1_MOUSE;Q8K1G9_MOUSE	1	900.276	883.038	1699.67	2250.18	1692.26	1442.18	1362.85	2140.84
A2ADY9	Protein DDI1 homolog 2	Ddi2	A2ADY9	A2ADY9	Ddi2	Protein DDI1 homolog 2	DDI2_MOUSE	9	17770.2	18841.6	17497	19783.7	20853.8	22991.1	21040	21780.4
A2AEP0	Odorant-binding protein 1b	Obp1b	A2AEP0	A2AEP0;A0A0D3M033;A0A0D3M034;A2BHD2	Obp1b	Odorant-binding protein 1b	OBP1B_MOUSE	3	3315.01	4566.22	5127.91	4027.57	3309.35	4375.94	2819.01	2251.82
A2AF47	Dedicator of cytokinesis protein 11	Dock11	A2AF47	A2AF47;A0A2X0U2I4	Dock11	Dedicator of cytokinesis protein 11	DOC11_MOUSE	8	4432.56	3937.5	4713.55	4514.33	4426.06	3917.44	4637.64	5418.45
A2AFG7	L1 cell adhesion molecule	L1cam	A2AFG7;A2AFG8;Q6PGJ3	A2AFG7;A2AFG8;Q6PGJ3	L1cam	L1 cell adhesion molecule	A2AFG7_MOUSE;A2AFG8_MOUSE;Q6PGJ3_MOUSE	1	5433.29	4704.1	5163.67	4624.86	5067.28	6242.62	4681.12	5823.7
A2AFQ2	Hydroxysteroid (17-beta) dehydrogenase 10	Hsd17b10	A2AFQ2;Q99N15;Q9CYT3	A2AFQ2;Q99N15;Q9CYT3	Hsd17b10	Hydroxysteroid (17-beta) dehydrogenase 10	A2AFQ2_MOUSE;Q99N15_MOUSE;Q9CYT3_MOUSE	4	27388.3	38680.3	30581.3	27342.9	24291.4	26849.7	29221	27511.5
A2AGH6	Mediator of RNA polymerase II transcription subunit 12	Med12	A2AGH6	A2AGH6;A2AGH8;A2AGH9;Q2NLB9	Med12	Mediator of RNA polymerase II transcription subunit 12	MED12_MOUSE	4	4495.67	2191.5	3807.85	4030.74	3787.47	2272.87	3320.24	3680.36
A2AGT5	Cytoskeleton-associated protein 5	Ckap5	A2AGT5	A2AGT5;K3W4R5;A0A0R4J0K2;Q4V782;Q6PB55;Q80U79;Q8K250;Z4YL78	Ckap5	Cytoskeleton-associated protein 5	CKAP5_MOUSE	49	25377.8	22210.8	23903.4	24973.1	24583.3	24337.1	22659	21300.4
A2AHC3	Calmodulin-regulated spectrin-associated protein 1	Camsap1	A2AHC3	A2AHC3;A0A0A0MQE5;A2AHC4	Camsap1	Calmodulin-regulated spectrin-associated protein 1	CAMP1_MOUSE	1		383.092		613.061	2091.32	706.073	1167.3	876.133
A2AHG0	Leucine zipper putative tumor suppressor 3	Lzts3	A2AHG0	A2AHG0	Lzts3	Leucine zipper putative tumor suppressor 3	LZTS3_MOUSE	5	5086.7	7215.48	7179.94	6640.48	6602.35	7241.81	6851.82	8309.61
A2AI05	NADPH-dependent diflavin oxidoreductase 1	Ndor1	A2AI05	A2AI05;A0A2I3BQN1;F6XCS1	Ndor1	NADPH-dependent diflavin oxidoreductase 1	NDOR1_MOUSE	2	3683.08	4123.49	5782.4	3223.96	3909.75	3492.75	6053.49	3296.67
A2AI08	Taperin	Tprn	A2AI08	A2AI08	Tprn	Taperin	TPRN_MOUSE	1	3378.53	3287.38	3367.77	3529.21	7169.79	3815.61	5700.54	4070.98
A2AIG8	1-aminocyclopropane-1-carboxylate synthase-like protein 1	Accs	A2AIG8	A2AIG8	Accs	1-aminocyclopropane-1-carboxylate synthase-like protein 1	1A1L1_MOUSE	1	5788.08	7853.09	5156.11	6264.07	4466.24	6319.13	4823.4	4119.3
A2AIL4	NADH dehydrogenase (ubiquinone) complex I, assembly factor 6	Ndufaf6	A2AIL4	A2AIL4	Ndufaf6	NADH dehydrogenase (ubiquinone) complex I, assembly factor 6	NDUF6_MOUSE	3	6449.57	12210.7	10578.3	9680.57	6678.41	7235.29	5811.95	7640.32
A2AIV2	Protein virilizer homolog	Virma	A2AIV2	A2AIV2;E9PZY8	Virma	Protein virilizer homolog	VIR_MOUSE	15	5611.24	6033.05	5303.39	5704.7	5147.95	5846.88	5884.2	5613.67
A2AIV8	Caspase recruitment domain-containing protein 9	Card9	A2AIV8	A2AIV8	Card9	Caspase recruitment domain-containing protein 9	CARD9_MOUSE	3	2465.85	3154.24	2530.63	1933.92	2603.86	2179.2	1738.3	2541.46
A2AJ15	Endoplasmic reticulum mannosyl-oligosaccharide 1,2-alpha-mannosidase	Man1b1	A2AJ15	A2AJ15;Q8BIL8;A2AJ14	Man1b1	Endoplasmic reticulum mannosyl-oligosaccharide 1,2-alpha-mannosidase	MA1B1_MOUSE	19	17650.1	17912.2	19132.5	17644.5	20684.6	19673.3	17915.7	19483.5
A2AJ72	Far upstream element (FUSE) binding protein 3	Fubp3	A2AJ72;Q3TIX6	Q3TIX6;A0A0A6YVV5;A2AJ72;F7AM43;Q3ULP9	Fubp3	Far upstream element (FUSE) binding protein 3	A2AJ72_MOUSE;Q3TIX6_MOUSE	12	10165.9	12639.1	12064	10674.8	13554.9	12549.6	13549	11585.9
A2AJ88	Patatin-like phospholipase domain-containing protein 7	Pnpla7	A2AJ88	A2AJ88	Pnpla7	Patatin-like phospholipase domain-containing protein 7	PLPL7_MOUSE	8	5178.01	7730.1	6984.11	7525.21	7230.27	8183.08	8503.43	7029.25
A2AJI0	MAP7 domain-containing protein 1	Map7d1	A2AJI0	A2AJI0;F6WF36	Map7d1	MAP7 domain-containing protein 1	MA7D1_MOUSE	5	8802.23	6756.87	9583.01	9555.7	12611.9	10248.1	14691.4	14566.6
A2AJL3	FGGY carbohydrate kinase domain-containing protein	Fggy	A2AJL3	A2AJL3;A0A8X8M4B3;A0A8X8RHI6;A2AJL4;B1AY71;D6RHR3;H3BJ80	Fggy	FGGY carbohydrate kinase domain-containing protein	FGGY_MOUSE	22	45188.7	52633.6	57458.5	45458.7	52976.7	43813.8	46818.7	47115.8
A2AKB9	DDB1- and CUL4-associated factor 10	Dcaf10	A2AKB9	A2AKB9;Z4YN28	Dcaf10	DDB1- and CUL4-associated factor 10	DCA10_MOUSE	3	2618.48	2771.65	3229.57	2856.69	3522.79	2675.53	2745.85	3515.32
A2AKG8	Focadhesin	Focad	A2AKG8	A2AKG8;E9PYJ6;Q80T90	Focad	Focadhesin	FOCAD_MOUSE	10	4882.49	4894.19	4217.4	4081.82	4760.99	4965.14	4415.17	4870.75
A2AKK5	Acyl-coenzyme A amino acid N-acyltransferase 1	Acnat1	A2AKK5	A2AKK5	Acnat1	Acyl-coenzyme A amino acid N-acyltransferase 1	ACNT1_MOUSE	4	12637.5	12814	13074.2	9838.09	10688.2	11092	8584.12	9043.86
A2AL36	Centriolin	Cntrl	A2AL36	A2AL36;A0A0G2JFA2;B2RXX1;E9Q9E7;R4GML3;R4GML4	Cntrl	Centriolin	CNTRL_MOUSE	1	780.222	1349.34	745.84		496.109	1253.45	222.389	1201.15
A2ALK8	Tyrosine-protein phosphatase non-receptor type 3	Ptpn3	A2ALK8	A2ALK8;A2ALK9;Q14BS5;Q8BWC1	Ptpn3	Tyrosine-protein phosphatase non-receptor type 3	PTN3_MOUSE	3	3153.44	3125.87	2302.6	2919.68	2190.7	2376.27	1574.72	3061.18
A2ALS5	Rap1 GTPase-activating protein 1	Rap1gap	A2ALS5	A2ALS5;A2ALS4;A2ALS3	Rap1gap	Rap1 GTPase-activating protein 1	RPGP1_MOUSE	5	10901.6	11257	10745.1	9624.19	10147.3	9539.8	10615.4	9492.85
A2ALU4	Protein Shroom2	Shroom2	A2ALU4	A2ALU4;Q1W617;Q9QXN0;A7TU71;E9QMY5;Q8C7N5;A0A0R4J1H8;A0A286YDQ8;B7ZNA0;E9Q6I3	Shroom2	Protein Shroom2	SHRM2_MOUSE	8	11401.2	11377.2	11109	11171.5	13065.9	12689.5	10284.4	11493.1
A2ALW5	DnaJ homolog subfamily C member 25	Dnajc25	A2ALW5	A2ALW5	Dnajc25	DnaJ homolog subfamily C member 25	DJC25_MOUSE	2	2995.3	2284.88	3029.05	2932.3	2985.71	2739.2	3273.32	3217.78
A2AM29	Protein AF-9	Mllt3	A2AM29	A2AM29;Q3UIA3	Mllt3	Protein AF-9	AF9_MOUSE	1	3108.98		1964.94	3568.02	2891.62	1445.01	2691.54	1863.64
A2AMW0	F-actin-capping protein subunit beta	Capzb	A2AMW0;Q3TVK4;Q923G3	A2AMW0;Q3TRH8;Q3TVK4;Q923G3	Capzb	F-actin-capping protein subunit beta	A2AMW0_MOUSE;Q3TVK4_MOUSE;Q923G3_MOUSE	3	94226.3	114131	105648	125184	114640	131755	139784	168844
A2AN08	E3 ubiquitin-protein ligase UBR4	Ubr4	A2AN08	A2AN08;Z4YMA7	Ubr4	E3 ubiquitin-protein ligase UBR4	UBR4_MOUSE	93	47179.3	43537.6	46746.1	47175.6	49432.7	46025.4	47006.4	45231.7
A2ANC6	Adaptor-related protein 5 complex, sigma 1 subunit	Ap5s1	A2ANC6	A2ANC6	Ap5s1	Adaptor-related protein 5 complex, sigma 1 subunit	A2ANC6_MOUSE	2	2400.89		2681.86		2365.56	3795.92	2285.84	2725.45
A2ANY6	Midasin	Mdn1	A2ANY6;J3QMC5	A2ANY6;J3QMC5	Mdn1	Midasin	A2ANY6_MOUSE;J3QMC5_MOUSE	16	10038	10226.6	8891.02	8723.58	8335.01	9083.47	8377.45	8227.51
A2APC3	Probable tubulin polyglutamylase TTLL9	Ttll9	A2APC3	A2APC3;E9PUG4;Z4YLM0	Ttll9	Probable tubulin polyglutamylase TTLL9	TTLL9_MOUSE	1			7783.92
A2APT9	Kelch domain-containing protein 7A	Klhdc7a	A2APT9	A2APT9;Q8C7K3	Klhdc7a	Kelch domain-containing protein 7A	KLD7A_MOUSE	8	15959.4	19792.8	18056.1	18874.6	16474	18805.3	20433.5	18527.4
A2APV2	Formin-like protein 2	Fmnl2	A2APV2	Q6ZPF4;A2APV2;A2AQW2;D3Z7A7;F8VPR2	Fmnl2	Formin-like protein 2	FMNL2_MOUSE	21	15021.1	14357.3	13559.6	15680.4	13831.8	13279.8	14447.8	15011.5
A2APY7	Arginine-hydroxylase NDUFAF5, mitochondrial	Ndufaf5	A2APY7	A2APY7	Ndufaf5	Arginine-hydroxylase NDUFAF5, mitochondrial	NDUF5_MOUSE	5	6583.69	6432.07	5448.93	6403.66	5506.68	4525.88	7497.48	5433.62
A2AQ07	Tubulin beta-1 chain	Tubb1	A2AQ07	A2AQ07	Tubb1	Tubulin beta-1 chain	TBB1_MOUSE	3	3362.31	8416.23	7555.07	7500.34	3837.16	5189.82	4009.42	6792.51
A2AQ19	RNA polymerase-associated protein RTF1 homolog	Rtf1	A2AQ19	A2AQ19;Q3UXG8	Rtf1	RNA polymerase-associated protein RTF1 homolog	RTF1_MOUSE	9	13191.7	13799.8	16034.5	15598.5	13246.7	13055.2	14711.8	12930.3
A2AQ25	Sickle tail protein	Skt	A2AQ25	A2AQ25;B2RY09;D3Z781;E9QAU4;Q3UFL8	Skt	Sickle tail protein	SKT_MOUSE	25	20037	18622.3	20649.5	22477	21246	20744.5	20901.5	19662
A2AQJ8	Glucosidase, alpha	Ganc	A2AQJ8;Q3UXV0;Q5DU67	A2AQJ8;Q3UXV0;Q5DU67	Ganc	Glucosidase, alpha; neutral C	A2AQJ8_MOUSE;Q3UXV0_MOUSE;Q5DU67_MOUSE	1	9162.49	8057.08	9093.12	10974.3	10917.2	9202.06	10242.3	11045.2
A2AQW0	Mitogen-activated protein kinase kinase kinase 15	Map3k15	A2AQW0	A2AQW0	Map3k15	Mitogen-activated protein kinase kinase kinase 15	M3K15_MOUSE	6	6669.19	8488.77	6824.58	5523.8	6555.14	5732.08	5418.92	4944.7
A2AQX6	Predicted gene 14147	Gm14151	A2AQX6	Q8C0X8;A2AQX6	Gm14151	Predicted gene 14147	A2AQX6_MOUSE	2		2873.61	4634.16	3210.62		4649.63	4398.7
A2AR02	Peptidyl-prolyl cis-trans isomerase G	Ppig	A2AR02	A2AR02;B2RWT5;Q05CC5;Q05DE4;Q80VC1;Q3UZ38	Ppig	Peptidyl-prolyl cis-trans isomerase G	PPIG_MOUSE	4	19436.4	14006.6	17747.1	22549.7	21117.4	16678.9	20069.1	21304.4
A2ARA8	Integrin alpha-8	Itga8	A2ARA8	A2ARA8;G3UYN5	Itga8	Integrin alpha-8	ITA8_MOUSE	7	29705.1	35858	29495.3	27365	28692.7	31480.1	32554.7	33688.6
A2ARP1	Inositol hexakisphosphate and diphosphoinositol-pentakisphosphate kinase 1	Ppip5k1	A2ARP1	A2ARP1;B9EHS3	Ppip5k1	Inositol hexakisphosphate and diphosphoinositol-pentakisphosphate kinase 1	VIP1_MOUSE	8	7627.21	8023.11	6712.62	7069.78	9983.01	9195.36	8705.73	9561.88
A2ART0	Predicted gene 14391	Gm14391	A2ART0;A2ARX1	A2ART4;A0A087WRL6;A2ARL5;A2ART0;A2ARW1;A2ARW8;A2ARX1;A2AW67;A2BE23;A2BFG5;A2BG91;F7CEW8;Q569M0	Gm14391;Gm6710	Predicted gene 14391	A2ART0_MOUSE;A2ARX1_MOUSE	1	2369.67		3254.95	1837.22	1991.44	907.671	1594.45	2126.63
A2ARV4	Low-density lipoprotein receptor-related protein 2	Lrp2	A2ARV4	A2ARV4;A2ARV5	Lrp2	Low-density lipoprotein receptor-related protein 2	LRP2_MOUSE	171	272948	442888	373778	285189	270997	246843	257269	269530
A2ASQ1	Agrin	Agrn	A2ASQ1	A2ASQ1;M0QWP1;Q5EBX5;Q6PCM6;Z4YK85;Q8K326	Agrn	Agrin	AGRIN_MOUSE	59	266036	250091	269076	270909	226136	232506	234346	241075
A2ASS6	Titin	Ttn	A2ASS6	A2ASS6;A0A5K1VVQ9;E9Q8N1;A0A5K1VVQ1	Ttn	Titin	TITIN_MOUSE	4	13255.6	13541.8	15053.4	17355.4	14794.6	11572	15914.4	14149.5
A2ASZ8	Mitochondrial adenyl nucleotide antiporter SLC25A25	Slc25a25	A2ASZ8	A2ASZ8;Z4YLR9	Slc25a25	Mitochondrial adenyl nucleotide antiporter SLC25A25	SCMC2_MOUSE	8	11334.8	16823.6	15752.7	14265	13137.9	13342.1	14085.3	13438
A2AT37	Regulator of nonsense transcripts 2	Upf2	A2AT37	A2AT37	Upf2	Regulator of nonsense transcripts 2	RENT2_MOUSE	8	5599.15	6689.72	6574.07	7510.97	7581.19	5738.28	6453.73	5094.25
A2ATK8	Family with sequence similarity 171, member A1	Fam171a1	A2ATK8;A2ATK9	A2ATK9;A2ATK8;A2ATL0	Fam171a1	Family with sequence similarity 171, member A1	A2ATK8_MOUSE;A2ATK9_MOUSE	2	2906.98	3949.55	2208.21	3672.86	2983.47	4037.85	3552.12	3252.19
A2ATU0	2-oxoadipate dehydrogenase complex component E1	Dhtkd1	A2ATU0	A2ATU0	Dhtkd1	2-oxoadipate dehydrogenase complex component E1	DHTK1_MOUSE	10	13119.9	20120.3	10499.6	12827.7	6935.98	8177.76	6170.98	9121.99
A2AUA2	Olfactory receptor	Or4a78	A2AUA2;Q7TQZ3	A2AUA2;Q7TQZ3	Or4a78;Or4a80	Olfactory receptor	A2AUA2_MOUSE;Q7TQZ3_MOUSE	1				1875.53
A2AUK7	Erythrocyte membrane protein band 4.1 like 1	Epb41l1	A2AUK7;A2AUK8	A2AUK7;A2AUK8;A0A2R8VHB6	Epb41l1	Erythrocyte membrane protein band 4.1 like 1	A2AUK7_MOUSE;A2AUK8_MOUSE	3	8237.79	10390.8	8064.03	6591.21	12240.7	14057.6	13018.3	15038.5
A2AUY4	Bromodomain adjacent to zinc finger domain protein 2B	Baz2b	A2AUY4	A2AUY4;A2AUY3;Q69ZI8	Baz2b	Bromodomain adjacent to zinc finger domain protein 2B	BAZ2B_MOUSE	2	3160.87	2521.26	2108.07	2137.52	3782.23	2801.2	3189.99	2125.74
A2AVA0	Sushi, von Willebrand factor type A, EGF and pentraxin domain-containing protein 1	Svep1	A2AVA0	A2AVA0	Svep1	Sushi, von Willebrand factor type A, EGF and pentraxin domain-containing protein 1	SVEP1_MOUSE	17	9127.32	7575.37	8079.97	8756.75	11494.2	9332.03	9677.07	9620.33
A2AWA9	Rab GTPase-activating protein 1	Rabgap1	A2AWA9	A6H6A9;A2AWA9;B2RRC5	Rabgap1	Rab GTPase-activating protein 1	RBGP1_MOUSE	26	21238.9	20576.4	20602.6	18855.9	21156.4	21020.6	20805.7	20723.8
A2AWL7	MAX gene-associated protein	Mga	A2AWL7	A2AWL7;E9QLG3;H7BX50;Q3ULI0	Mga	MAX gene-associated protein	MGAP_MOUSE	3	2489.02	1800.79	2736.6	2340.54	1926.14	1704.59	1680.36	2467.5
A2AWP8	Rho guanine nucleotide exchange factor 10-like protein	Arhgef10l	A2AWP8	A2AWP8;A2AWP6	Arhgef10l	Rho guanine nucleotide exchange factor 10-like protein	ARGAL_MOUSE	13	25218.5	22196.8	23259.1	23737.8	23098.3	21738	15410.6	21271.1
A2AWT3	Ataxin-7-like protein 3	Atxn7l3	A2AWT3	A2AWT3;Z4YN62	Atxn7l3	Ataxin-7-like protein 3	AT7L3_MOUSE	1					545.271			606.803
A2AWT5	Upstream binding transcription factor, RNA polymerase I	Ubtf	A2AWT5;A2AWT6;A2AWT7;Q9DBH1	A2AWT5;Q9DBH1;A2AWT6;A2AWT7	Ubtf	Upstream binding transcription factor, RNA polymerase I	A2AWT5_MOUSE;A2AWT6_MOUSE;A2AWT7_MOUSE;Q9DBH1_MOUSE	2	15226.7	25217.5	15999.7	14912.6	11518.2	8774.89	12850	13457.5
A2BDN9	Uncharacterized protein	1810030O07Rik	A2BDN9	Q8C5K5;A2BDN9	1810030O07Rik	Uncharacterized protein	A2BDN9_MOUSE	3	1408.36	1535.64	839.369	1390.99	1687.46	1238.14	983.241	1034.75
A2BDX3	Adenylyltransferase and sulfurtransferase MOCS3	Mocs3	A2BDX3	A2BDX3	Mocs3	Adenylyltransferase and sulfurtransferase MOCS3	MOCS3_MOUSE	11	42743.4	46094.1	49151.4	47963.1	51135.6	42526.3	41796	38617.3
A2BE28	Ribosomal biogenesis protein LAS1L	Las1l	A2BE28	A2BE28	Las1l	Ribosomal biogenesis protein LAS1L	LAS1L_MOUSE	10	8657.36	8005.94	8475.35	8451.34	8325.11	8787.48	8306.07	8992.09
A2BG95	PWWP domain containing 4D	Pwwp4a	A2BG95;A3KG49;Q52KH6	Q52KH6;A2BG95;A3KG49;Q9DAY0	Pwwp4a;Pwwp4c;Pwwp4d	PWWP domain containing 4D	A2BG95_MOUSE;A3KG49_MOUSE;Q52KH6_MOUSE	1		56728.9	43657.7		56343.3	53592		63856.3
A2BGI8	Peptidyl-prolyl cis-trans isomerase (Fragment)	Ppih	A2BGI8;Q4G0C5	A2BGI8;Q3UWH9;Q3UY37;Q4G0C5	Ppih	Peptidyl-prolyl cis-trans isomerase (Fragment)	A2BGI8_MOUSE;Q4G0C5_MOUSE	1	5259.5	6433.54	6220.04	5137.97	6632.63	7084.61	7384.85	8759.89
A2BH40	AT-rich interactive domain-containing protein 1A	Arid1a	A2BH40	A2BH40;E9QAQ7	Arid1a	AT-rich interactive domain-containing protein 1A	ARI1A_MOUSE	18	10997.2	10437.2	9424.4	9787.89	10527.9	10275.9	10837.4	10081.6
A2CEK7	Major urinary protein 12	Mup14	A2CEK7	A2AKN8;A2CEK7;E9PVW0;B8JI96	Mup14	Major urinary protein 12	A2CEK7_MOUSE	25	1113730	590268	1063920	1414550	1713530	992565	936856	808721
A2CG49	Kalirin	Kalrn	A2CG49	A2CG49;D3Z4R2;D3Z532;D3Z534;D3Z535;F6QYT9	Kalrn	Kalirin	KALRN_MOUSE	1		1421.75
A2NN81	B9-scFv	Igh-V7183	A2NN81	A0A075B5Q4;A2NN81;X5J4L1;X5J4W6	Igh-V7183	B9-scFv	A2NN81_MOUSE	3	200564	133673	174476	262912	179781	183017	215387	242918
A2NW55	E8 variable heavy chain (Fragment)		A2NW55	A2NW55		E8 variable heavy chain (Fragment)	A2NW55_MOUSE	1	4339.64	2807.86	2934.94	4509.02	2447.34	1655.31	2959.85	1957.48
A2RSJ4	Bridge-like lipid transfer protein family member 3B	Bltp3b	A2RSJ4	A2RSJ4;Q8C318	Bltp3b	Bridge-like lipid transfer protein family member 3B	BLT3B_MOUSE	13	8780.56	10255.8	8566.94	9181.19	10101.2	9621.01	10974.9	9400.34
A2RSQ0	DENN domain-containing protein 5B	Dennd5b	A2RSQ0	A2RSQ0	Dennd5b	DENN domain-containing protein 5B	DEN5B_MOUSE	3	6574.17	7682.52	8441.97	8159.87	8048.94	5459.08	5603.21	5384.05
A2RSX7	tRNA wybutosine-synthesizing protein 5	Tyw5	A2RSX7	A2RSX7	Tyw5	tRNA wybutosine-synthesizing protein 5	TYW5_MOUSE	5	7855.26	10109.4	9039.46	10368.8	10209.8	8310.93	10026	9402.52
A2RSY6	TRMT1-like protein	Trmt1l	A2RSY6	A2RSY6;A0A0R4J0U8	Trmt1l	TRMT1-like protein	TRM1L_MOUSE	3	13935.2	11766	13949.6	15224	12380.3	10826.7	12159.3	11230.3
A2RT67	DENN domain-containing protein 3	Dennd3	A2RT67	A2RT67;G3UYA1	Dennd3	DENN domain-containing protein 3	DEND3_MOUSE	13	13732.8	14978.1	14664.3	11981.4	12254.4	12898.7	13608.5	14300.8
A2RTH5	Leucine carboxyl methyltransferase 1	Lcmt1	A2RTH5	A0A0U1RNF2;A2RTH5	Lcmt1	Leucine carboxyl methyltransferase 1	A2RTH5_MOUSE	11	49105.4	54588.5	52491.4	50752.4	52728	56128	52591	51037.4
A2TJV2	Paralemmin-3	Palm3	A2TJV2	A2TJV2	Palm3	Paralemmin-3	PALM3_MOUSE	5	3754.46	3934.74	2985.96	2455.05	3381.23	2610.87	2066.64	2469.34
A2VCP8	Clathrin light chain (Fragment)	Cltb	A2VCP8;Q3TJ95;Q3TWZ9	A2VCP8;Q3TJ95;Q3TWZ9	Cltb	Clathrin light chain (Fragment)	A2VCP8_MOUSE;Q3TJ95_MOUSE;Q3TWZ9_MOUSE	1	8941.93	10534.8	12912.3	11672	13477.9	14657.7	19986.1	25979.2
A3KFU5	Polyadenylate-binding protein	Pabpc4	A3KFU5;A3KFU8;Q6PHQ9;Q91YZ8;Q99LF8	A3KFU5;A3KFU8;Q3UX16;Q6PHQ9;Q91YZ8;Q99LF8	Pabpc4	Polyadenylate-binding protein	A3KFU5_MOUSE;A3KFU8_MOUSE;Q6PHQ9_MOUSE;Q91YZ8_MOUSE;Q99LF8_MOUSE	14	23888.4	22186	24000.2	24391.1	22448.9	23380.1	23035.3	23016.5
A3KFX0	Cytosolic 5'-nucleotidase 1A	Nt5c1a	A3KFX0	A3KFX0	Nt5c1a	Cytosolic 5'-nucleotidase 1A	5NT1A_MOUSE	2	5544.74	7314.85	9439.54	8021.44	5986.08	8606.4	8214.67	8609.46
A3KGB4	TBC1 domain family member 8B	Tbc1d8b	A3KGB4	A3KGB4;B9EKQ1	Tbc1d8b	TBC1 domain family member 8B	TBC8B_MOUSE	3	3626.8	4552.6	4518.57	3773.12	2641.69	3720.64	4723.84	3324.91
A3KGF7	1-phosphatidylinositol 4,5-bisphosphate phosphodiesterase beta-2	Plcb2	A3KGF7	A3KGF7;B7ZNI1;E9PYI3	Plcb2	1-phosphatidylinositol 4,5-bisphosphate phosphodiesterase beta-2	PLCB2_MOUSE	2	2090.7	1519.35	3143.7	2464.21	2314.79	2394.3	1080.76	2132.8
A3KGS3	Ral GTPase-activating protein subunit alpha-2	Ralgapa2	A3KGS3	A3KGS3;A0A2I3BPN8;A0A0A0MQD7;F7AI67;F7CGP0	Ralgapa2	Ral GTPase-activating protein subunit alpha-2	RGPA2_MOUSE	10	4730.86	5125.07	4341.36	4763.57	5232.32	4542.05	4545.56	4366.02
A3KGU5	Spectrin alpha, non-erythrocytic 1	Sptan1	A3KGU5;E9Q447	A3KGU5;E9Q447	Sptan1	Spectrin alpha, non-erythrocytic 1	A3KGU5_MOUSE;E9Q447_MOUSE	1	9611.07	8218.19	8126.77	9779.12	7475.83	7743.54	11493.8	8869.02
A3KGV1	Outer dense fiber protein 2	Odf2	A3KGV1	A3KGV1;A3KGV9;A3KGW0;Q3UFG2;V9GXZ0	Odf2	Outer dense fiber protein 2	ODFP2_MOUSE	4	1853.56	2059.36	1752.45	2033.71	1112.19	1626.6	1387.46	2361.07
A3KMN0	Zbtb16 protein (Fragment)	Zbtb16	A3KMN0;Q3UQ17	Q3UQ17;A3KMN0	Zbtb16	Zbtb16 protein (Fragment)	A3KMN0_MOUSE;Q3UQ17_MOUSE	1		1961.21	1551		1657.33	3096.79	2723.3	3029.59
A3KMP2	Tetratricopeptide repeat protein 38	Ttc38	A3KMP2	A3KMP2	Ttc38	Tetratricopeptide repeat protein 38	TTC38_MOUSE	23	99945.8	123991	107155	100920	101446	108407	108281	109007
A4FU62	LOC207685 protein (Fragment)	Iglv2	A4FU62	P01843;A0A0G2JE99;A4FU62;G0YP42;Q9D8W4	Iglv2	LOC207685 protein (Fragment)	A4FU62_MOUSE	8	50652.4	37889.9	47814.3	72641.5	60857.8	40418.2	55411.3	47008.7
A4VCH8	Fbxl18 protein (Fragment)	Fbxl18	A4VCH8;E9PYR1;F8VQK6;Q14BU8;Q3U4A0	A4VCH8;E9PYR1;F8VQK6;Q14BU8;Q3U4A0	Fbxl18	Fbxl18 protein (Fragment)	A4VCH8_MOUSE;E9PYR1_MOUSE;F8VQK6_MOUSE;Q14BU8_MOUSE;Q3U4A0_MOUSE	4	7679.22	6349.68	8269.06	7752.13	7005.06	5129.22	5688.54	5732.75
A6H584	Collagen alpha-5(VI) chain	Col6a5	A6H584	A6H584;Q8C6K9;A0A140T8W1;E9Q6A6;B9EK79	Col6a5	Collagen alpha-5(VI) chain	CO6A5_MOUSE	2	5036.16	4398.39	2387.03	4090.78	4074.07	2494.99		3259.3
A6H5X4	PHD finger protein 11	Phf11	A6H5X4	A6H5X4	Phf11	PHD finger protein 11	PHF11_MOUSE	5	4194.31	3758.73	4535.12	5690.6	9468.84	6318.98	3968.86	3632.74
A6H5Y3	Methionine synthase	Mtr	A6H5Y3	A6H5Y3;Q8BUC4	Mtr	Methionine synthase	METH_MOUSE	21	16077.9	14724.9	13697.1	15456.4	15512.6	15464.4	15035.4	15440.9
A6H5Z3	Exocyst complex component 6B	Exoc6b	A6H5Z3	A6H5Z3;Q8C203	Exoc6b	Exocyst complex component 6B	EXC6B_MOUSE	6	6128.71	4384.04	5194.3	5376.83	6014.86	5539.84	5999.9	5556.56
A6H611	Mitochondrial intermediate peptidase	Mipep	A6H611	A6H611;Q8BLL4;A0A286YDC5	Mipep	Mitochondrial intermediate peptidase	MIPEP_MOUSE	15	30270.8	36259.5	34046.6	35022.8	33855.6	29124.4	29761.7	32160.5
A6H630	Damage-control phosphatase ARMT1	Armt1	A6H630	A6H630;D6RG65	Armt1	Damage-control phosphatase ARMT1	ARMT1_MOUSE	9	20190.6	20531.9	19236.6	17022.2	21451.4	23300.3	18638.1	18712.3
A6H6A9	Rab GTPase-activating protein 1-like	Rabgap1l	A6H6A9	A6H6A9	Rabgap1l	Rab GTPase-activating protein 1-like	RBG1L_MOUSE	8	34867	36879.1	36814.1	34479.4	36577.9	37348.4	35401.5	36662.6
A6H6E2	Multimerin-2	Mmrn2	A6H6E2	A6H6E2	Mmrn2	Multimerin-2	MMRN2_MOUSE	13	16251.7	19797.9	15884.6	16534.4	15275.8	14821.7	15805.6	15248.9
A6H6S0	Hect domain and RLD 3	Herc3	A6H6S0;Q80U90;Q8CFQ0	A6H6S0;G5E876;Q80U90;Q8CFQ0;Q9CYM1	Herc3;mKIAA0032	Hect domain and RLD 3	A6H6S0_MOUSE;Q80U90_MOUSE;Q8CFQ0_MOUSE	3	2493.33	2705.71	1212.15	1600.55	1881.64	1739.5	1871.4	1884.38
A6H8H2	DENN domain-containing protein 4C	Dennd4c	A6H8H2	A6H8H2;E9Q449	Dennd4c	DENN domain-containing protein 4C	DEN4C_MOUSE	17	16786.9	17762.5	18669.9	20367.8	24374.4	18807.8	19736.1	18030.2
A6PWS5	Gelsolin (Fragment)	Gsn	A6PWS5;Q3TGJ9;Q3U9Q8;Q3UCW8;Q6PAC1	Q6PAC1;A6PWS5;Q3TGJ9;Q3U9Q8;Q3UCW8	Gsn	Gelsolin (Fragment)	A6PWS5_MOUSE;Q3TGJ9_MOUSE;Q3U9Q8_MOUSE;Q3UCW8_MOUSE;Q6PAC1_MOUSE	2	239205	234412	208592	265398	312820	297788	331028	408668
A6PWY4	WD repeat-containing protein 76	Wdr76	A6PWY4	A6PWY4	Wdr76	WD repeat-containing protein 76	WDR76_MOUSE	2	5085.91	4117.46	3629.97	4207.69	5002.87	4423.44	1990.8	4285.1
A6X8Z5	Rho GTPase-activating protein 31	Arhgap31	A6X8Z5	A6X8Z5;B2RSI0	Arhgap31	Rho GTPase-activating protein 31	RHG31_MOUSE	2	4095.41	6279.87	3539.5	2531.83	5200.15	5025.48	3376.37	4368.07
A6X919	Protein C-mannosyl-transferase DPY19L1	Dpy19l1	A6X919	A6X919	Dpy19l1	Protein C-mannosyl-transferase DPY19L1	D19L1_MOUSE	1	4306.15	5375.8	3988.66	5134.21	3734.28	4711.62	4272.78	4057.36
A6X935	Inter alpha-trypsin inhibitor, heavy chain 4	Itih4	A6X935	A6X935;A0A2K6EDJ7;E9PVD2;E9Q5L2	Itih4	Inter alpha-trypsin inhibitor, heavy chain 4	ITIH4_MOUSE	36	105418	78245.1	125186	132854	108475	97255.8	92753.9	162043
A7MCU9	Pyruvate kinase	Pklr	A7MCU9;E9Q509;G3X925;Q3UEH4;Q3UEI4	G3X925;A7MCU9;E9Q509;Q3UEH4;Q3UEI4	Pklr	Pyruvate kinase	A7MCU9_MOUSE;E9Q509_MOUSE;G3X925_MOUSE;Q3UEH4_MOUSE;Q3UEI4_MOUSE	2	4944	4834.23	4273.86	3748.37	5202.82	6567.78	7560.49	6269.96
A8C756	tRNA (32-2'-O)-methyltransferase regulator THADA	Thada	A8C756	A8C756	Thada	tRNA (32-2'-O)-methyltransferase regulator THADA	THADA_MOUSE	8	5960.54	5030.68	5856.12	6464.52	5898.64	5712.09	5026.9	5835.08
A8DUL0	Beta-globin	Hbbt1	A8DUL0	A8DUL0	Hbbt1	Beta-globin	A8DUL0_MOUSE	1	3249.27		3322.75	4217.14	2296.49	2310.17	3312.15	3210.33
A8DUP7	Beta-globin	Hbbt1	A8DUP7	A8DUP7	Hbbt1	Beta-globin	A8DUP7_MOUSE	3	7026.89	9058.76	5301.82	8299.43	3048.32	6343.59	5974.3	8074.19
A8DUQ1	Beta-globin	Hbbt1	A8DUQ1	P02088;A8DUK4;D0U269;D0U270;D4N6R6;D4N6V9;A8DUK0;A8DUK2;A8DUK7;A8DUL0;A8DUL2;A8DUL5;A8DUL7;A8DUM2;A8DUN2;A8DUP0;A8DUP3;A8DUP5;A8DUP7;A8DUQ1;B1Q450;E9Q223	Hbbt1	Beta-globin	A8DUQ1_MOUSE	24	2371360	4589230	3773450	4602890	2373210	3320220	3501750	4638760
A8Y5H7	SEC14-like protein 1	Sec14l1	A8Y5H7	A8Y5H7;Q8BXE6	Sec14l1	SEC14-like protein 1	S14L1_MOUSE	2	3330.27	3939.43	5845.03	3997.08	3951.6	3186.48	3488.96	2860
A9XX86	Macrophage galactose N-acetyl-galactosamine specific lectin 2	Mgl2	A9XX86	A9XX86;F6QSC4;Q8JZN1;Q8BUD5	Mgl2	Macrophage galactose N-acetyl-galactosamine specific lectin 2	A9XX86_MOUSE	15	48452.1	30354.2	33410.1	36723	17716.1	12030	13564.8	17498.6
B0V2N1	Receptor-type tyrosine-protein phosphatase S	Ptprs	B0V2N1	B0V2N1;Q3UNN3;A0A286YEA4	Ptprs	Receptor-type tyrosine-protein phosphatase S	PTPRS_MOUSE	1	2712.07			2956.36	3292.02	3228.88	3663.83	3253.71
B1AQD3	RAB34, member RAS oncogene family	Rab34	B1AQD3;B1AQD4;Q0PD20	B1AQD4;B1AQD3;Q0PD20;Q3TV85	Rab34	RAB34, member RAS oncogene family	B1AQD3_MOUSE;B1AQD4_MOUSE;Q0PD20_MOUSE	1	565.924	1213.04	1415.56
B1AR13	CDGSH iron-sulfur domain-containing protein 3, mitochondrial	Cisd3	B1AR13	B1AR13;B2RWE3;B3DFI8;Z4YKM2	Cisd3	CDGSH iron-sulfur domain-containing protein 3, mitochondrial	CISD3_MOUSE	8	24092.9	29156.7	27354.5	34463.1	25510.1	24549.7	23583.4	24222
B1AR17	DNA helicase	Chd3	B1AR17;E9Q614;F7C528	B1AR17;E9Q614;F7C528;A0A5F8MQ82;Q8K0T3	Chd3	DNA helicase	B1AR17_MOUSE;E9Q614_MOUSE;F7C528_MOUSE	7	8325.89	8743.53	8291.15	7873.65	8473.32	7493.56	8372.96	8630.08
B1ART1	Vacuolar protein sorting 13D	Vps13d	B1ART1;B1ART2	B1ART2;B1ART1	Vps13d	Vacuolar protein sorting 13D	B1ART1_MOUSE;B1ART2_MOUSE	30	7769.05	8250.94	8265.97	7508.46	8054.86	8332.73	7382.93	7553.85
B1ASA5	Zinc finger protein 362	Zfp362	B1ASA5;E9QA68	B1ASA5;E9QA68	Zfp362	Zinc finger protein 362	B1ASA5_MOUSE;E9QA68_MOUSE	4	6211.59	6228.77	6875.52	8903.59	5833.58	5400.12	7668.97	5746.58
B1ASN7	EF-hand calcium binding domain 3 (Fragment)	Efcab3	B1ASN7	B1ASN7	Efcab3	EF-hand calcium binding domain 3 (Fragment)	B1ASN7_MOUSE	1	3887.75		3477.19	4065.81	7319.72	5404.98	6570.2	7289.52
B1ASP2	Tyrosine-protein kinase	Jak1	B1ASP2;Q3U8P8;Q3URU8;Q3UZ30;Q8CFX4	B1ASP2;Q3U8P8;Q3URU8;Q3UZ30;Q8CFX4	Jak1	Tyrosine-protein kinase	B1ASP2_MOUSE;Q3U8P8_MOUSE;Q3URU8_MOUSE;Q3UZ30_MOUSE;Q8CFX4_MOUSE	2	6692.95	3935.04	5495.64	3929.96	5097.77	5610.47	6043.48	5002.41
B1ATS5	Calcium-transporting ATPase	Atp2a3	B1ATS5;Q91YM6	B1ATS5;E9Q559;Q91YM6	Atp2a3	Calcium-transporting ATPase	B1ATS5_MOUSE;Q91YM6_MOUSE	1	2646.2			3404.16				1276.04
B1AUC7	Rho GTPase-activating protein 36	Arhgap36	B1AUC7	B1AUC7;Z4YJK0;Z4YMR3	Arhgap36	Rho GTPase-activating protein 36	RHG36_MOUSE	1	266.953	1197.19	1198.18	1043.62	1372.97	1514.39	623.693	1330.32
B1AUE5	Peroxisome biogenesis factor 10	Pex10	B1AUE5	B1AUE5	Pex10	Peroxisome biogenesis factor 10	PEX10_MOUSE	3	6920.7	7765.61	6853.91	7727.22	6639.33	6622.42	5211.78	4746.09
B1AUH1	Receptor-type tyrosine-protein phosphatase U	Ptpru	B1AUH1	B1AUH1;Q3V360	Ptpru	Receptor-type tyrosine-protein phosphatase U	PTPRU_MOUSE	1			2079.16		2166.85	1429.59	2090.41	2987.65
B1AUX5	Rho GTPase activating protein 4	Arhgap4	B1AUX5;B1AUY2;B1AUY3;E9PYS6;Q32MS4;Q3TE27;Q80Z68;Q8VHL8	B1AUY3;B1AUX5;B1AUY2;E9PYS6;F6SL55;Q32MS4;Q3TE27;Q6ZQI7;Q80Z68;Q8BM00;Q8VHL8	Arhgap4	Rho GTPase activating protein 4	B1AUX5_MOUSE;B1AUY2_MOUSE;B1AUY3_MOUSE;E9PYS6_MOUSE;Q32MS4_MOUSE;Q3TE27_MOUSE;Q80Z68_MOUSE;Q8VHL8_MOUSE	7	17399.1	14243.9	18210.8	17453.1	17365.2	17389.9	14924.4	15985.7
B1AVD1	Xaa-Pro aminopeptidase 2	Xpnpep2	B1AVD1	B1AVD1;B1AVD2;Q8BU59	Xpnpep2	Xaa-Pro aminopeptidase 2	XPP2_MOUSE	6	8783.97	10393.8	7210.89	8321.58	11587.4	10041.9	11183.9	10867.2
B1AVH7	TBC1 domain family member 2A	Tbc1d2	B1AVH7	B1AVH7	Tbc1d2	TBC1 domain family member 2A	TBD2A_MOUSE	3	4290.66	2596.69	3481.16	3041.94	2534	2698.79	2165.05	3709.66
B1AVY7	Kinesin-like protein KIF16B	Kif16b	B1AVY7	B1AVY7;A0A1D5RMD4;E7FLY0	Kif16b	Kinesin-like protein KIF16B	KI16B_MOUSE	7	7666.94	7083.39	10603.6	9119.17	11292.6	10117.2	8766.42	8541.64
B1AVZ0	Uracil phosphoribosyltransferase homolog	Uprt	B1AVZ0	B1AVZ0	Uprt	Uracil phosphoribosyltransferase homolog	UPP_MOUSE	8	21211.7	16731.9	19278.6	20482	21159.3	22560.9	21486.4	20634.3
B1AXH1	NHS-like protein 2	Nhsl2	B1AXH1	B1AXH1	Nhsl2	NHS-like protein 2	NHSL2_MOUSE	5	6777.75	6100.86	6786.19	4850.74	6165.78	6264.8	5382.76	6156.42
B1AXP6	Mitochondrial import receptor subunit TOM5 homolog	Tomm5	B1AXP6	B1AXP6	Tomm5	Mitochondrial import receptor subunit TOM5 homolog	TOM5_MOUSE	3	49746.9	35175	51232.9	48329.2	48546.6	53398.2	56744	46388.4
B1AXW5	Peroxiredoxin-1 (Fragment)	Prdx1	B1AXW5	B1AXW5	Prdx1	Peroxiredoxin-1 (Fragment)	B1AXW5_MOUSE	1		2054.99	3133.19	1823.34	1281.58		1447.35
B1AY10	Transcriptional repressor NF-X1	Nfx1	B1AY10	B1AY10	Nfx1	Transcriptional repressor NF-X1	NFX1_MOUSE	4	7794.75	11024.1	8906.75	8289.02	7044.83	9185.12	6836.1	9149.18
B1AY13	Ubiquitin carboxyl-terminal hydrolase 24	Usp24	B1AY13	B1AY13;A0AAG1F6P4	Usp24	Ubiquitin carboxyl-terminal hydrolase 24	UBP24_MOUSE	48	18273.2	18561.2	20133.4	19195.7	21312.4	20426.8	20548.1	18983.2
B1AZ26	Cobl-like 1 (Fragment)	Cobll1	B1AZ26	B1AZ14;B1AZ15;B1AZ26	Cobll1	Cobl-like 1 (Fragment)	B1AZ26_MOUSE	2	4860.43	3918.84	4295.69	4369.97	6811.29	4357.36	4487.33	3253.87
B1AZA5	Transmembrane protein 245	Tmem245	B1AZA5	B1AZA5;D3YWD3;Q8C3N3	Tmem245	Transmembrane protein 245	TM245_MOUSE	5	9566.82	8674.81	9323.47	8232.66	7683.63	7038.27	7939.97	8947.12
B1AZI6	THO complex subunit 2	Thoc2	B1AZI6	B1AZI6;E9Q5E2;Q3US09;Q3UYT9	Thoc2	THO complex subunit 2	THOC2_MOUSE	23	19674.4	17133.1	17935.4	17202	18541.6	19175.2	17918.9	18802.4
B1AZP2	Disks large-associated protein 4	Dlgap4	B1AZP2	B1AZP2;B7ZNS2;E9PUF2;F6YMR0;H3BJD4;I1E4X0;Q3UCF7	Dlgap4	Disks large-associated protein 4	DLGP4_MOUSE	10	32774.5	26457.5	30889.9	30022.1	32949.5	35403.5	33498.6	30096.7
B2KF05	Bromodomain and PHD finger-containing protein 3	Brpf3	B2KF05	B2KF05;A0A3B2W3T2;A0A3B2WCP8;A0A3B2WCX7;A0A3B2WD05;A0A3B2WD38;A0A3B2WD39;Q6ZPU7	Brpf3	Bromodomain and PHD finger-containing protein 3	BRPF3_MOUSE	1			2863.43			1975.34
B2KF50	Bridge-like lipid transfer protein family member 3A	Bltp3a	B2KF50;Q570Z6	B2KF50;Q570Z6	Bltp3a	Bridge-like lipid transfer protein family member 3A	B2KF50_MOUSE;Q570Z6_MOUSE	8	4654.88	4926.8	5014.15	3756.55	4554.64	5433.36	4324.4	5318.04
B2LVG5	Cleavage and polyadenylation specificity factor subunit 4	Cpsf4	B2LVG5;B2LVG6;E0CXT7;F7B6Z5	B2LVG5;B2LVG6;E0CXT7;F7B6Z5	Cpsf4	Cleavage and polyadenylation specificity factor subunit 4	B2LVG5_MOUSE;B2LVG6_MOUSE;E0CXT7_MOUSE;F7B6Z5_MOUSE	3	11103.6	10044.8	10527.9	9705.87	10206.7	10766	10202.3	9948.43
B2M1R6	Heterogeneous nuclear ribonucleoprotein K	Hnrnpk	B2M1R6;H3BJS9;H3BKD0;H3BKI8;Q3U6X2;Q3U9Q3	B2M1R6;H3BKD0;H3BKI8;Q3U6X2;Q3U9Q3;H3BJS9	Hnrnpk	Heterogeneous nuclear ribonucleoprotein K	B2M1R6_MOUSE;H3BJS9_MOUSE;H3BKD0_MOUSE;H3BKI8_MOUSE;Q3U6X2_MOUSE;Q3U9Q3_MOUSE	4	16206	12519	6096.72	9742	9504.53	8761.97	9385.74	11768.3
B2RQ71	Dip2c protein	Dip2c	B2RQ71;E9PWR4	B2RQ71;B7ZMZ7;E9PWR4;Q5EBR0;Q69ZV2;Q6NY04;Q6PGL8	Dip2c	Dip2c protein	B2RQ71_MOUSE;E9PWR4_MOUSE	5	7693.91	7866.99	7487.36	6368.77	6865.27	6430.02	6623.58	7967.25
B2RQC6	Multifunctional protein CAD	Cad	B2RQC6	B2RQC6;E9QAI5;Q80VF8;G3UWN2;Q9CWQ9	Cad	Multifunctional protein CAD	PYR1_MOUSE	52	29537.7	25992.1	31489.2	30125.5	28876.4	27756.9	29330.6	29622.5
B2RQE8	Rho GTPase-activating protein 42	Arhgap42	B2RQE8	B2RQE8	Arhgap42	Rho GTPase-activating protein 42	RHG42_MOUSE	5	112199	118909	102206	143285	117763	104681	115057	94157.1
B2RQG2	PHD finger protein 3	Phf3	B2RQG2	A0A087WS81;A0PJJ1;B2RQG2	Phf3	PHD finger protein 3	B2RQG2_MOUSE	4	5701.68	5926.21	4753.7	6793.9	9105.21	7084.77	8966.22	6899.04
B2RR83	3'-5' RNA helicase YTHDC2	Ythdc2	B2RR83	B2RR83	Ythdc2	3'-5' RNA helicase YTHDC2	YTDC2_MOUSE	6	3506.74	3694.86	2993.57	3167.87	3403.12	3078.11	3416.25	2887.26
B2RRE7	OTU domain-containing protein 4	Otud4	B2RRE7	B2RRE7;A0A0R4J260	Otud4	OTU domain-containing protein 4	OTUD4_MOUSE	4	13522.6	12554.9	11336.6	16305.9	13507.9	13633	13548.3	13758.9
B2RSH2	Guanine nucleotide-binding protein G(i) subunit alpha-1	Gnai1	B2RSH2	B2RSH2	Gnai1	Guanine nucleotide-binding protein G(i) subunit alpha-1	GNAI1_MOUSE	6	16725.7	24088.4	20912.5	18056.2	18266.2	18202.5	17107.8	18395.4
B2RT89	Predicted gene, EG434674	Slc22a28	B2RT89;E9PVA5;Q3V3G0;Q7TNX9;Q810T7;Q8BWE8;Q96LX3	Q8BWE8;B2RT89;E9PVA5;Q3V3G0;Q7TNX9;Q810T7;Q96LX3	Slc22a28;Slc22a30	Predicted gene, EG434674	B2RT89_MOUSE;E9PVA5_MOUSE;Q3V3G0_MOUSE;Q7TNX9_MOUSE;Q810T7_MOUSE;Q8BWE8_MOUSE;Q96LX3_MOUSE	1	2584.4	6322.3	6277.83	4976.95	2754.01	2291.08		904.44
B2RU80	Receptor-type tyrosine-protein phosphatase beta	Ptprb	B2RU80	B2RU80;A0A1W2P7W3;Q80VN7;Q3TS01;Q9JJ07	Ptprb	Receptor-type tyrosine-protein phosphatase beta	PTPRB_MOUSE	4	16736.2	14148.6	14081.7	19500.7	16254	13701.9	13637.4	14346.5
B2RUD9	Predicted gene 4787	Gm4787	B2RUD9	Q8CGQ2;B2RUD9;Q6IMH8	Gm4787	Predicted gene 4787	B2RUD9_MOUSE	1				1667.93
B2RUG5	EG214403 protein	Cfhr4	B2RUG5;E9Q8B5;Q0KHD3	B2RUG5;E9Q8B5;E9Q8B6;Q0KHD2;Q0KHD3	Cfhr4	EG214403 protein	B2RUG5_MOUSE;E9Q8B5_MOUSE;Q0KHD3_MOUSE	11	41669	43164.4	43585.7	39689.7	31671.7	29943.5	31523.7	35679.8
B2RUP2	Protein unc-13 homolog D	Unc13d	B2RUP2	B2RUP2;A0A0R4J257;A2A855;A2A858;Q80UG7	Unc13d	Protein unc-13 homolog D	UN13D_MOUSE	5	6539.53	5509.9	6593.92	7547.83	5808.3	5772.23	5371.5	6972.06
B2RUR8	OTU domain-containing protein 7B	Otud7b	B2RUR8	B2RUR8	Otud7b	OTU domain-containing protein 7B	OTU7B_MOUSE	4	8508.22	8139.66	6856.66	6308.05	7889.66	5188.66	7248.55	5574.31
B2RV77	Cystatin domain containing 4	Cstdc4	B2RV77	B2RV77;Q9D8D6	Cstdc4	Cystatin domain containing 4	B2RV77_MOUSE	4	17804.7	10572.5	14846.2	16119.5	11579.9	16354.6	17373.5	22996.1
B2RWR2	Lpcat2 protein	Lpcat2	B2RWR2	B2RWR2	Lpcat2	Lpcat2 protein	B2RWR2_MOUSE	1	6553.12					7267.76		5676.7
B2RWS6	Histone acetyltransferase p300	Ep300	B2RWS6	B2RWS6;P45481;F8VPR5;A0A0U1RQB6;Q8QZV8;A0A0U1RPL2;Q6GQV9;A0A0U1RP46	Ep300	Histone acetyltransferase p300	EP300_MOUSE	13	13806.7	12544	12009	13031.9	12296	12150	12364.4	13671.5
B2RWW2	Golgb1 protein	Golgb1	B2RWW2;E9PVZ8;E9QAH1	B2RWW2;E9PVZ8;E9QAH1	Golgb1	Golgb1 protein	B2RWW2_MOUSE;E9PVZ8_MOUSE;E9QAH1_MOUSE	98	23901.7	24679.5	24338.6	25541.7	26929.9	26418.7	27346.3	26495
B2RX08	Spectrin beta chain	Sptb	B2RX08;E9Q397;Q149M1;Q3UGX2;Q3UGY4;Q5DTG9	Q3UGX2;B2RX08;E9Q397;Q149M1;Q3UGY4;Q5DTG9	Sptb	Spectrin beta chain	B2RX08_MOUSE;E9Q397_MOUSE;Q149M1_MOUSE;Q3UGX2_MOUSE;Q3UGY4_MOUSE;Q5DTG9_MOUSE	1		8975.9	6407.74	5772.1	4179.75	6077.58	4855.22	7346.05
B2RX12	ATP-binding cassette sub-family C member 3	Abcc3	B2RX12	B2RX12;A0A0R4J015;Q9CVX4	Abcc3	ATP-binding cassette sub-family C member 3	MRP3_MOUSE	3	4950.98	2912.75	3850.15	3533.72	4187.92	4015.12	4082.15	3577.05
B2RXC1	Trafficking protein particle complex subunit 11	Trappc11	B2RXC1	B2RXC1	Trappc11	Trafficking protein particle complex subunit 11	TPC11_MOUSE	17	20263.8	20818.8	19672.9	19271.4	21147.1	20824.5	23886.2	21070.5
B2RXC6	DNA-directed RNA polymerase subunit	Polr3a	B2RXC6	B2RXC6	Polr3a	DNA-directed RNA polymerase subunit	B2RXC6_MOUSE	15	10321.5	9285.57	10141.5	10842.7	9948.68	9529.75	9703.42	8480.59
B2RXC8	3222402P14Rik protein	Ppp2r3a	B2RXC8	B2RXC8;Q8BXX8	Ppp2r3a	3222402P14Rik protein	B2RXC8_MOUSE	2	7775.75	6083.2	8571.11	9808.97	8216.49	7377.26	5597.38	6115.27
B2RXQ2	Ppfia1 protein	Ppfia1	B2RXQ2;B2RXW8;B8QI33	B2RXQ2;B2RXW8;B8QI33;S4R1D4	Ppfia1	Ppfia1 protein	B2RXQ2_MOUSE;B2RXW8_MOUSE;B8QI33_MOUSE	19	21978.1	22001.6	20994.7	22794.8	24334.3	25687.7	23045.2	23599.5
B2RXR6	Serine/threonine-protein phosphatase 6 regulatory ankyrin repeat subunit B	Ankrd44	B2RXR6	B2RXR6;E9QNQ2;J3QK13	Ankrd44	Serine/threonine-protein phosphatase 6 regulatory ankyrin repeat subunit B	ANR44_MOUSE	17	55827.1	57728.3	54252.5	64332.4	56858.4	49535.3	52025.7	55404.7
B2RXS4	Plexin-B2	Plxnb2	B2RXS4	B2RXS4;Q8CHG6;Q99LF0	Plxnb2	Plexin-B2	PLXB2_MOUSE	49	173257	175363	171406	174817	190179	188431	198625	189086
B2RXT3	oxoglutarate dehydrogenase (succinyl-transferring)	Ogdhl	B2RXT3	B2RXT3;E9Q7L0	Ogdhl	oxoglutarate dehydrogenase (succinyl-transferring)	B2RXT3_MOUSE	11	13343.2	12214.7	13599.2	11912.9	9784.45	12326	11639.8	12131.2
B2RY04	Dedicator of cytokinesis protein 5	Dock5	B2RY04	B2RY04	Dock5	Dedicator of cytokinesis protein 5	DOCK5_MOUSE	22	13067	10625.6	11555.5	10303.4	10459.5	10708.8	10738.7	10127.5
B2RY51	Thyroid hormone receptor interactor 11	Trip11	B2RY51;E9Q512	B2RY51;E9Q512;H3BJG4;Q3UTR9	Trip11	Thyroid hormone receptor interactor 11	B2RY51_MOUSE;E9Q512_MOUSE	31	16190.5	15091.6	15796.3	16199.1	16221.3	15396.5	15480.8	14051.7
B2RY56	RNA-binding protein 25	Rbm25	B2RY56	B2RY56;S4R2A4;S4R2B0;S4R2J1	Rbm25	RNA-binding protein 25	RBM25_MOUSE	7	34663.1	30613	34893	39689.6	35803.5	35262.7	29519.1	30387.7
B4XVQ1	PHD finger protein 11B	Phf11b	B4XVQ1	B4XVQ1	Phf11b	PHD finger protein 11B	B4XVQ1_MOUSE	1		1670.75			2121.17	2177.35
B5X0G2	Major urinary protein 17	Mup17	B5X0G2	B5X0G2;A2AKN8;A2CEK6;E9PVW0;Q58EV3;B0V388;E9QA79;L7N222	Mup17	Major urinary protein 17	MUP17_MOUSE	3	5890.46		4432.55	8678.6	9042.99	2989.82	4156.24	3063.27
B7ZMP1	Xaa-Pro aminopeptidase 3	Xpnpep3	B7ZMP1	B7ZMP1	Xpnpep3	Xaa-Pro aminopeptidase 3	XPP3_MOUSE	12	15715.3	16337.1	13642.8	13566.6	15018.7	15367.5	15642.2	14730.5
B7ZMY4	Adap1 protein (Fragment)	Adap1	B7ZMY4;E9PY16;Q6PGM4;Q8BVR8;Q8BVS1	E9PY16;B7ZMY4;Q6PGM4;Q8BVR8;Q8BVS1	Adap1	Adap1 protein (Fragment)	B7ZMY4_MOUSE;E9PY16_MOUSE;Q6PGM4_MOUSE;Q8BVR8_MOUSE;Q8BVS1_MOUSE	9	11671	13618.1	12301.8	13314.5	11132.9	13249.1	15834.8	14374.2
B7ZP03	UDP-glucuronosyltransferase	Ugt2b36	B7ZP03;B9EIY3;D3YWN0;Q3UEC9;Q3UEP4;Q91WH2	B7ZP03;B9EIY3;D3YWN0;Q3UEC9;Q3UEP4;D3YUP6;Q91WH2	Ugt2b36;Ugt2b38	UDP-glucuronosyltransferase	B7ZP03_MOUSE;B9EIY3_MOUSE;D3YWN0_MOUSE;Q3UEC9_MOUSE;Q3UEP4_MOUSE;Q91WH2_MOUSE	1	1496.65	2713.23	2992.27	2350.9	963.627	1700.23	1295.51	1248.11
B8JI96	Major urinary protein 14 (Fragment)	Mup14	B8JI96	B8JI96	Mup14	Major urinary protein 14 (Fragment)	B8JI96_MOUSE	2	8206.38	6770.11	11758.7	12471.4	14314.1	8480.46	7003.35	5159.78
B8JK07	Cytochrome P450, family 4, subfamily f, polypeptide 13	Cyp4f13	B8JK07;Q99N19	B8JK07;Q99KY6;Q99N19	Cyp4f13	Cytochrome P450, family 4, subfamily f, polypeptide 13	B8JK07_MOUSE;Q99N19_MOUSE	2	9214.79	14458.5	11795.4	11285.6	9089.24	11230.3	11097.4	9150.04
B8JK39	Integrin alpha-9	Itga9	B8JK39	B8JK39;Q91YD5;E9QAP0;Q3UT74;Q80V97;Q8BJG9	Itga9	Integrin alpha-9	ITA9_MOUSE	10	13119.9	8940.1	12307.9	11779.9	11686.9	11622.6	10583.1	13111.2
B8ZXI1	Queuine tRNA-ribosyltransferase accessory subunit 2	Qtrt2	B8ZXI1	B8ZXI1;A0A5F8MPN7;Z4YJE9;A0A5F8MPK7;A0A5F8MPV7	Qtrt2	Queuine tRNA-ribosyltransferase accessory subunit 2	QTRT2_MOUSE	6	4298.63	6364.59	4974.61	5650.46	6522.73	5705.57	5187.04	5830.79
B9EHG2	Olfactory receptor	Or1s2	B9EHG2;Q7TQQ4	B9EHG2;Q7TQQ4;Q8VGP7	Or1s2	Olfactory receptor	B9EHG2_MOUSE;Q7TQQ4_MOUSE	1	5557.78	5142.15	4915.79	4487.55	6335.93	4248.84	8025.79	3867.64
B9EHK4	Cyp2ab1 protein	Cyp2ab1	B9EHK4;E9PZ31;Q8BTM0;S4R196	B9EHK4;E9PZ31;Q8BTM0;S4R196	Cyp2ab1	Cyp2ab1 protein	B9EHK4_MOUSE;E9PZ31_MOUSE;Q8BTM0_MOUSE;S4R196_MOUSE	1	5846.52	11588.8	9032.25	6187.55	6153.39	6054.63	4993.51	4203.67
B9EHZ5	Membrane protein, palmitoylated 6 (MAGUK p55 subfamily member 6)	Pals2	B9EHZ5;Q6NSS8;Q811G2	B9EHZ5;Q6NSS8;Q811G2	Pals2	Membrane protein, palmitoylated 6 (MAGUK p55 subfamily member 6)	B9EHZ5_MOUSE;Q6NSS8_MOUSE;Q811G2_MOUSE	1	13820.2	16779.5	14745.9	17480.4	13388.6	12245.3	9821.49	14176.3
B9EJ23	Cask protein	Cask	B9EJ23;F6Y9I5	B9EJ23;F6Y9I5	Cask	Cask protein	B9EJ23_MOUSE;F6Y9I5_MOUSE	1	5903.12	7037.77	4437.71	3339.16	3532.54	3877.42	3405.57	4066.51
B9EJ80	PDZ domain-containing protein 8	Pdzd8	B9EJ80	B9EJ80	Pdzd8	PDZ domain-containing protein 8	PDZD8_MOUSE	6	6838.55	6102.41	7513.06	7365.33	7352.1	6686.93	7417.84	7341.4
B9EJ86	Oxysterol-binding protein-related protein 8	Osbpl8	B9EJ86	B9EJ86;A0A0R4J150;A0A5F8MPC5	Osbpl8	Oxysterol-binding protein-related protein 8	OSBL8_MOUSE	19	23121.3	23818.3	24321.3	23201.5	20915.4	21493.7	23980.8	20074
B9EJI9	Transmembrane protein 229A	Tmem229a	B9EJI9	B9EJI9;Q8BN70	Tmem229a	Transmembrane protein 229A	T229A_MOUSE	2	8327.59	4311.98	3995.91	5331.03	4034.36	4042.54	2739.38
B9EJR8	Dynein axonemal assembly factor 5	Dnaaf5	B9EJR8	B9EJR8	Dnaaf5	Dynein axonemal assembly factor 5	DAAF5_MOUSE	5	4516.5	5516.06	4554.24	4139.01	4212.31	3809.81	4564.77	4079.19
B9EKC5	Calcineurin binding protein 1	Cabin1	B9EKC5;G3X8Q1;Q3TDW4;Q6PH97	B9EKC5;G3X8Q1;Q3TDW4;Q6PH97;Q8BIF4	Cabin1	Calcineurin binding protein 1	B9EKC5_MOUSE;G3X8Q1_MOUSE;Q3TDW4_MOUSE;Q6PH97_MOUSE	1		9949.06		4735.28		3972.35
B9EKI3	TATA element modulatory factor	Tmf1	B9EKI3	B9EKI3	Tmf1	TATA element modulatory factor	TMF1_MOUSE	12	7974.09	7728.33	7660.69	7279.5	8543.64	7943.34	8391.6	7706.78
C0HK79	Adipocyte-related X-chromosome expressed sequence 1	Arxes1	C0HK79;C0HK80	C0HK79;C0HK80	Arxes1;Arxes2	Adipocyte-related X-chromosome expressed sequence 1	ARXS1_MOUSE;ARXS2_MOUSE	2	14804.2	10233.4	11908.3	15027.5	12689.9	11742.5	9089.4	11185
C0HKC8	Sperm motility kinase 3A	Smok3a	C0HKC8;C0HKC9	C0HKC8;C0HKC9;B9EKK5	Smok3a;Smok3b	Sperm motility kinase 3A	SMK3A_MOUSE;SMK3B_MOUSE	1			4174.3		4443.97	3753.13	5109.46	5415.65
C0HKD8	Microfibrillar-associated protein 1A	Mfap1a	C0HKD8;C0HKD9	C0HKD8;C0HKD9	Mfap1a;Mfap1b	Microfibrillar-associated protein 1A	MFA1A_MOUSE;MFA1B_MOUSE	3	4921.21	6548.96	8567.85	7710.38	7257.53	5937.74	6305.86	5490.64
C0HKE1	Histone H2A type 1-B	H2ac11	C0HKE1;C0HKE2;C0HKE3;C0HKE4;C0HKE5;C0HKE6;C0HKE7;C0HKE8;C0HKE9;Q8BFU2;Q8CGP5;Q8CGP6;Q8CGP7;Q8R1M2	C0HKE1;C0HKE2;C0HKE3;C0HKE4;C0HKE5;C0HKE6;C0HKE7;C0HKE8;C0HKE9;Q64523;Q6GSS7;Q8BFU2;Q8CGP5;Q8CGP6;Q8CGP7;Q8R1M2;Q8CGP4;A0A0N4SV66;A0AUV1;A2AB79;A3KPD0;B2RVF0;B2RWH3;Q149V4;Q64426;Q61668	H2ac11;H2ac12;H2ac13;H2ac15;H2ac25;H2ac4;H2ac6;H2ac7;H2ac8;H2aj;Hist1h2af;Hist1h2an;Hist1h2ao;Hist1h2ap	Histone H2A type 1-B	H2A1B_MOUSE;H2A1C_MOUSE;H2A1D_MOUSE;H2A1E_MOUSE;H2A1F_MOUSE;H2A1G_MOUSE;H2A1H_MOUSE;H2A1I_MOUSE;H2A1K_MOUSE;H2A1N_MOUSE;H2A1O_MOUSE;H2A1P_MOUSE;H2A3_MOUSE;H2AJ_MOUSE	4	9025.4	9337.93	10386.8	10558.4	7870.36	12191.6	6425.21	6359.04
C0HKG5	Ribonuclease T2-A	Rnaset2a	C0HKG5;C0HKG6	C0HKG5;C0HKG6;Q5FWA0;A0A338P711;A0A338P7E3	Rnaset2a;Rnaset2b	Ribonuclease T2-A	RNT2A_MOUSE;RNT2B_MOUSE	11	455921	418310	414106	410124	698670	676520	655093	635987
D0QMC3	Myeloid cell nuclear differentiation antigen-like protein	Mndal	D0QMC3	D0QMC3;P0DOV1;Q8CGE8;A0A1Z3MI21;A0A087WRA4	Mndal	Myeloid cell nuclear differentiation antigen-like protein	MNDAL_MOUSE	10	16439.5	14544.2	16872.4	17390.6	18195.2	17351.9	15508.9	14647.9
D3YTL5	Capping actin protein, gelsolin like (Fragment)	Capg	D3YTL5;Q3TNN6;Q3UJ44;Q99LB4	Q99LB4;D3YTL5;D3YU77;D3YZN3;Q3TNN6;Q3UJ44	Capg	Capping actin protein, gelsolin like (Fragment)	D3YTL5_MOUSE;Q3TNN6_MOUSE;Q3UJ44_MOUSE;Q99LB4_MOUSE	4	243170	152944	139449	210421	199765	220429	194807	219342
D3YTP3	Metaxin	Mtx3	D3YTP3	D3YTP3;A0A286YDW3	Mtx3	Metaxin	D3YTP3_MOUSE	2	5708.03	8962.72	5508.08	4482.17	4788.5	4509.19	3487.51	7017.52
D3YU39	Cholinephosphotransferase 1	Chpt1	D3YU39	D3YU39	Chpt1	Cholinephosphotransferase 1	D3YU39_MOUSE	1	1005.8	469.602	516.958		2892.64	1338.97	1525.68	1521.04
D3YUE4	Protein FAM151B	Fam151b	D3YUE4	D3YUE4	Fam151b	Protein FAM151B	F151B_MOUSE	5	3395.47	4097.36	4095.21	4182.01	3591.83	4708.79	4386.23	4617.67
D3YUP5	Exocyst complex component 3-like 2	Exoc3l2	D3YUP5	D3YUP5	Exoc3l2	Exocyst complex component 3-like 2	D3YUP5_MOUSE	14	11319	13647	13081.3	13570.1	9147.67	8337.87	9365.55	8981.26
D3YUS5	RAS protein activator like 2	Rasal2	D3YUS5;E9PW37;Q0VAV5	D3YUS5;E9PW37;Q0VAV5	Rasal2	RAS protein activator like 2	D3YUS5_MOUSE;E9PW37_MOUSE;Q0VAV5_MOUSE	4	15231	15518.1	13917.9	16617.6	20245.6	13883.6	12893.3	15428.4
D3YV69	RAB6A, member RAS oncogene family	Rab6a	D3YV69;Q3U4W5	D3YV69;Q3U4W5	Rab6a	RAB6A, member RAS oncogene family	D3YV69_MOUSE;Q3U4W5_MOUSE	1	4903.02	2463.56	4287.79	3604.58	2371.42	1917.51	3321.82	3042.18
D3YVW2	Golgi integral membrane protein 4	Golim4	D3YVW2;F6RUD1	D3YVW2;F6RUD1	Golim4	Golgi integral membrane protein 4	D3YVW2_MOUSE;F6RUD1_MOUSE	1	5463.23	4102.73	3316.89	4300.59	5546.44	4118.03	3689.76	4555.89
D3YW26	Transcriptional adaptor 2B	Tada2b	D3YW26;D3Z4Z0	D3Z4Z0;D3YW26	Tada2b	Transcriptional adaptor 2B	D3YW26_MOUSE;D3Z4Z0_MOUSE	1	2483.9	1587.55	3554.22	2381.94	3038.29	2565.26	3330.67	2395.78
D3YWI1	Fructose-bisphosphate aldolase (Fragment)	Aldoa	D3YWI1	D3YWI1	Aldoa	Fructose-bisphosphate aldolase (Fragment)	D3YWI1_MOUSE	1		26698.6	58265.1	73230	65233.5	36399.3	59521.8	60488.4
D3YWJ4	Protein farnesyltransferase subunit beta	Fntb	D3YWJ4	D3YWJ4;Q6DG52	Fntb	Protein farnesyltransferase subunit beta	D3YWJ4_MOUSE	3	5182.18	3186.56	4852.93	5141.23	4225.93	5133	4337.58	4263.48
D3YWT1	Heterogeneous nuclear ribonucleoprotein H3	Hnrnph3	D3YWT1;D3Z3N4	D3YWT1;D3Z3N4	Hnrnph3	Heterogeneous nuclear ribonucleoprotein H3	D3YWT1_MOUSE;D3Z3N4_MOUSE	2	55797.6	42759.1	40280.3	24562.2	42208.3	43328	41372.4	35754.3
D3YWZ2	Villin-like (Fragment)	Vill	D3YWZ2;G5E8C6;G5E8H0	D3YWZ2;G5E8C6;G5E8H0	Vill	Villin-like (Fragment)	D3YWZ2_MOUSE;G5E8C6_MOUSE;G5E8H0_MOUSE	1	10710.4	10118.1	9672.48	8608.89	9820.41	6588.48	8340.51	6127.38
D3YX43	V-set and immunoglobulin domain-containing protein 10	Vsig10	D3YX43	D3YX43;E9PVW4	Vsig10	V-set and immunoglobulin domain-containing protein 10	VSI10_MOUSE	3	10690.7	10497.6	9585.45	10447.1	13235.7	12644.9	11548.6	11415
D3YXF5	Complement component 7	C7	D3YXF5	D3YXF5	C7	Complement component 7	D3YXF5_MOUSE	18	11202.8	12096.8	12793.3	13106.2	6719.38	6959.05	7647.2	7875.7
D3YXJ0	Diacylglycerol kinase eta	Dgkh	D3YXJ0	D3YXJ0;A0A2I3BQ43;A0A2I3BQ48;A0JP53	Dgkh	Diacylglycerol kinase eta	DGKH_MOUSE	2	2839.49	2872.63	3373.8	3309.94	3270.88	3205.58	2696.52	3928.92
D3YXJ5	LRAT domain containing 1	Lratd2	D3YXJ5	D3YXJ5	Lratd2	LRAT domain containing 1	D3YXJ5_MOUSE	8	21163.9	20998.6	17842.7	16192.4	18550	18414.2	16860.6	17881.2
D3YXK2	Scaffold attachment factor B1	Safb	D3YXK2	D3YXK2;S4R1M2	Safb	Scaffold attachment factor B1	SAFB1_MOUSE	10	44816.2	43068.3	46440.5	43889	47095.3	44251	43999.4	39934.1
D3YY94	Syntaxin 2 (Fragment)	Stx2	D3YY94;Q3TJ55;Q80W45	Q3TJ55;Q80W45;D3YY94	Stx2	Syntaxin 2 (Fragment)	D3YY94_MOUSE;Q3TJ55_MOUSE;Q80W45_MOUSE	1	11353.4	16702.3	15942.7	14383.8	12362.5	11559.9	14213.6	12314.8
D3YYM4	WD repeat-containing protein 72	Wdr72	D3YYM4	D3YYM4;A0A1L1SR77	Wdr72	WD repeat-containing protein 72	WDR72_MOUSE	5	6859.83	8395.08	6838.99	6552.34	5611.46	5856.26	5789.18	6348
D3YYT1	Cytokine-like nuclear factor N-PAC	Glyr1	D3YYT1	D3YYT1	Glyr1	Cytokine-like nuclear factor N-PAC	D3YYT1_MOUSE	1	10221.5	7875.03	9683.78	12547.5	11030.3	8409.72	7577.38	7729.58
D3YYU8	Obscurin-like protein 1	Obsl1	D3YYU8	D3YYU8;A0A803ZIZ6;A0A0A0MQG1;A0A0B4J1L4	Obsl1	Obscurin-like protein 1	OBSL1_MOUSE	4	5209.6	4245.07	4851.8	4999.88	6986.42	5599.26	6096.81	5553.32
D3YZP9	Coiled-coil domain-containing protein 6	Ccdc6	D3YZP9	D3YZP9	Ccdc6	Coiled-coil domain-containing protein 6	CCDC6_MOUSE	13	17938.7	16306.7	17559.8	18299	19733.4	16286.5	18346.7	16823.4
D3YZY2	Zinc finger CCCH type containing 7 A (Fragment)	Zc3h7a	D3YZY2;D6RI42;E9PWW6;E9Q8M5;Q3TIQ4;Q3UBH9;Q8C6Z3;Q8C7N4;Q8CEE5;Q8R2Q7	D3YZY2;D6RI42;E9PWW6;E9Q8M5;Q3TIQ4;Q3UBH9;Q8C6Z3;Q8C7N4;Q8CEE5;Q8R2Q7	Zc3h7a	Zinc finger CCCH type containing 7 A (Fragment)	D3YZY2_MOUSE;D6RI42_MOUSE;E9PWW6_MOUSE;E9Q8M5_MOUSE;Q3TIQ4_MOUSE;Q3UBH9_MOUSE;Q8C6Z3_MOUSE;Q8C7N4_MOUSE;Q8CEE5_MOUSE;Q8R2Q7_MOUSE	2	10897.6	7542.58	8404.17	9185.62	8430.13	9207.2	8404.37	8359.48
D3YZZ5	Transmembrane p24 trafficking protein 7	Tmed7	D3YZZ5;E9Q7G1	D3YZZ5;E9Q7G1	Tmed7	Transmembrane p24 trafficking protein 7	D3YZZ5_MOUSE;E9Q7G1_MOUSE	10	178116	172162	197031	163120	180856	203373	224246	179733
D3Z030	Capping protein regulator and myosin 1 linker 1	Carmil1	D3Z030	D3Z030	Carmil1	Capping protein regulator and myosin 1 linker 1	D3Z030_MOUSE	1	4243.41	4525.89	3596.77	4234.46	5172.66	3865.97	2984.31	5716.96
D3Z0M9	RNA helicase	Ddx23	D3Z0M9	D3Z0M9	Ddx23	RNA helicase	D3Z0M9_MOUSE	28	38090.1	35293.1	35494.5	36265.5	38854.7	35658.3	39560.3	37446.2
D3Z0Y2	Peroxiredoxin-6	Prdx6	D3Z0Y2;Q6A0D0;Q6GT24;Q8BPD3	Q6A0D0;D3Z0Y2;Q6GT24;Q8BPD3	Prdx6	Peroxiredoxin-6	D3Z0Y2_MOUSE;Q6A0D0_MOUSE;Q6GT24_MOUSE;Q8BPD3_MOUSE	2	220343	284945	232034	244999	227354	238528	229945	246330
D3Z286	Transmembrane protein with metallophosphoesterase domain	Tmppe	D3Z286	D3Z286	Tmppe	Transmembrane protein with metallophosphoesterase domain	D3Z286_MOUSE	3	28452.4	32400.6	35167.8	32175.6	26225.8	38187.2	32115	35756.1
D3Z2E7	Interferon activated gene 207	Ifi207	D3Z2E7;E9Q3L4	E9Q3L4;Q8BW36;D3Z2E7	Ifi207	Interferon activated gene 207	D3Z2E7_MOUSE;E9Q3L4_MOUSE	3	5719.47	6644.15	8743.62	7491.38	17789.1	16993.5	16202	11855
D3Z2N7	Major vault protein	Mvp	D3Z2N7;E9Q3X0;Q3THX5;Q3U7S9;Q8C2S9	E9Q3X0;Q3THX5;Q8C2S9;D3Z2N7;Q3U7S9	Mvp	Major vault protein	D3Z2N7_MOUSE;E9Q3X0_MOUSE;Q3THX5_MOUSE;Q3U7S9_MOUSE;Q8C2S9_MOUSE	2	15499.8	10449.6	11068	14580.8	10543.3	12643.5	13177.6	13947.6
D3Z2R5	Selenoprotein N	Selenon	D3Z2R5	D3Z2R5	Selenon	Selenoprotein N	SELN_MOUSE	4	7060.13	4637.83	5791.5	6757.03	5604.47	5000.48	5078.26	5789.58
D3Z3L3	Tripartite motif-containing protein 5	Trim12c	D3Z3L3;Q8CHU6	D3Z3L3;E9PV98;Q8CC73;Q8CHU6;Q99PQ1;A0A0R4J1B5	Trim12c	Tripartite motif-containing protein 5	D3Z3L3_MOUSE;Q8CHU6_MOUSE	10	7147.51	5950.96	6492.01	7957.3	10067.7	7386.21	7272.96	6914.43
D3Z3Y1	GPI ethanolamine phosphate transferase 2	Pigg	D3Z3Y1;D3Z4I0	D3Z3Y1;D3Z4I0;D3YTQ6	Pigg	GPI ethanolamine phosphate transferase 2	D3Z3Y1_MOUSE;D3Z4I0_MOUSE	6	5352.94	6259.36	5848.45	5997.59	6207.04	5475.3	5573.52	6635.12
D3Z423	E3 ubiquitin-protein ligase RNF212B	Rnf212b	D3Z423	D3Z423;A0A1W2P6W2;A0A1W2P7V7;A0A1W2P826	Rnf212b	E3 ubiquitin-protein ligase RNF212B	R212B_MOUSE	2	4099.11		5546.64	7313.22	6558.64			6576.2
D3Z4I3	RNA-binding protein 24	Rbm24	D3Z4I3;Q62176	D3Z4I3;Q62176;G3UWQ8;G3UXN1;Q3TLA1	Rbm24;Rbm38	RNA-binding protein 24	RBM24_MOUSE;RBM38_MOUSE	2	3119.75	4067.19	2568.49	3499.59	3775.8	3643.57	2954.29	2960.97
D3Z4K7	Ubiquitin specific peptidase 5 (isopeptidase T) (Fragment)	Usp5	D3Z4K7	D3Z4K7	Usp5	Ubiquitin specific peptidase 5 (isopeptidase T) (Fragment)	D3Z4K7_MOUSE	1				1639.95	2141.49	648.312	5246.05	4848.2
D3Z4S3	Putative peptidyl-tRNA hydrolase PTRHD1	Ptrhd1	D3Z4S3	D3Z4S3	Ptrhd1	Putative peptidyl-tRNA hydrolase PTRHD1	PTRD1_MOUSE	6	18639.2	16140.7	13602.7	19764.8	19577.9	19580.6	18498.7	17274.7
D3Z598	Latent transforming growth factor beta binding protein 4	Ltbp4	D3Z598	D3Z598	Ltbp4	Latent transforming growth factor beta binding protein 4	D3Z598_MOUSE	2	15027	9460.62	10920.5	16649.2	15493.1	16484.3	12871.9	16562.7
D3Z5G7	Carboxylic ester hydrolase	Ces1b	D3Z5G7	D3Z5G7	Ces1b	Carboxylic ester hydrolase	D3Z5G7_MOUSE	5	9093.21	8655.12	7079.43	8523.85	6174.15	7490.48	9951.84	8848.12
D3Z5I1	Zinc finger CCCH type, antiviral 1	Zc3hav1	D3Z5I1	D3Z5I1	Zc3hav1	Zinc finger CCCH type, antiviral 1	D3Z5I1_MOUSE	1	1444.88	370.034	1334.14	669.698	1841.06	1477.01	1194.19	1152.77
D3Z5S8	Terminal nucleotidyltransferase 5A	Tent5a	D3Z5S8	D3Z5S8;A0A087WS27	Tent5a	Terminal nucleotidyltransferase 5A	TET5A_MOUSE	2	4565.36	4195.35	5313.26	4662.91	2638.34	4848.59	3345.82	3102.08
D3Z689	ADAMTS-like 5	Adamtsl5	D3Z689	D3Z689	Adamtsl5	ADAMTS-like 5	D3Z689_MOUSE	5	7591.72	9559	8631.17	11505.1	9933.1	10823	11624.7	9169.57
D3Z6F0	Interferon induced protein with tetratricpeptide repeats 1B like 1	Ifit1bl1	D3Z6F0	D3Z6F0;E9PXF7;Q3U687	Ifit1bl1	Interferon induced protein with tetratricpeptide repeats 1B like 1	D3Z6F0_MOUSE	2				1306.26	2075.73	1657.16	1555.88	898.504
D3Z6F5	ATP synthase subunit alpha	Atp5f1a	D3Z6F5	D3Z6F5	Atp5f1a	ATP synthase subunit alpha	D3Z6F5_MOUSE	1	10446.5	14712.8	15229.2	12802.1	4187.81	7305.09	6785.49	8545.43
D3Z6Q9	Bridging integrator 2	Bin2	D3Z6Q9	D3Z6Q9;A0A5F8MQ05;S4R171;S4R1B8;S4R270	Bin2	Bridging integrator 2	BIN2_MOUSE	11	23478.2	20565.8	23739.4	25953.5	23669.3	26058.5	24227	27742.4
D3Z7A9	Leukocyte immunoglobulin-like receptor, subfamily A (with TM domain), member 5	Lilra5	D3Z7A9	D3Z7A9	Lilra5	Leukocyte immunoglobulin-like receptor, subfamily A (with TM domain), member 5	D3Z7A9_MOUSE	1	3624.5	3409.23	6464.29	6089.68	5065.12	6430.47	4525.27	5301.91
D3Z7F6	Cytochrome P450, family 2, subfamily t, polypeptide 4	Cyp2t4	D3Z7F6;E9PWV0	D3Z7F6;E9PWV0	Cyp2t4	Cytochrome P450, family 2, subfamily t, polypeptide 4	D3Z7F6_MOUSE;E9PWV0_MOUSE	2	7159.79	5709.27	13880.3	2720.86	6710	4975.02	5277.92	4167.9
D3Z7G8	Solute carrier family 4 (anion exchanger), member 4 (Fragment)	Slc4a4	D3Z7G8;E3VWA1	E1AWU4;E3VWA1;D3Z7G8	Slc4a4	Solute carrier family 4 (anion exchanger), member 4 (Fragment)	D3Z7G8_MOUSE;E3VWA1_MOUSE	2	1792.25	4187.89	2772.96	4167.02	2308.31	1967.84	2433.61	2164.18
D3Z7P3	Glutaminase kidney isoform, mitochondrial	Gls	D3Z7P3	D3Z7P3;D3Z7P4	Gls	Glutaminase kidney isoform, mitochondrial	GLSK_MOUSE	30	171275	146713	145311	177331	159919	155781	153899	148391
D3Z7Q2	Small integral membrane protein 20	Smim20	D3Z7Q2	D3Z7Q2	Smim20	Small integral membrane protein 20	SIM20_MOUSE	2	4013.91	3415.23	1835.44	4412.7	3890.92	3192.69	5441.12	4780.38
D3Z7X0	Acyl-Coenzyme A dehydrogenase family, member 12	Acad12	D3Z7X0	D3Z2B3;D3Z7X0	Acad12	Acyl-Coenzyme A dehydrogenase family, member 12	D3Z7X0_MOUSE	8	52755.8	89895.4	67931.8	62303.5	56344.7	54272.6	49064.5	61228
D6REG4	Glyoxylate reductase/hydroxypyruvate reductase	Grhpr	D6REG4	D6REG4	Grhpr	Glyoxylate reductase/hydroxypyruvate reductase	D6REG4_MOUSE	1	3365.46	3233.92	4060.09	5207.89	4296.43	2415.54
D6REH1	Peroxisomal membrane protein 2	Pxmp2	D6REH1;Q5D073	D6REH1;Q5D073	Pxmp2	Peroxisomal membrane protein 2	D6REH1_MOUSE;Q5D073_MOUSE	1	3645.73	4363.04	4297.52	2769.91	2498.67	4017.5	2613.98
D6RH62	DDHD domain containing 1	Ddhd1	D6RH62;E9QQ38;F8WHP5;F8WIJ5	D6RH62;E9QQ38;F8WHP5;F8WIJ5;Q2XP44;Q2XP45	Ddhd1	DDHD domain containing 1	D6RH62_MOUSE;E9QQ38_MOUSE;F8WHP5_MOUSE;F8WIJ5_MOUSE	1		4599.39	4563.22	5708.76	6562.75	3871.47	5612.8	4428.66
E0CZ22	Maestro heat-like repeat family member 1	Mroh1	E0CZ22	D3Z624;E0CZ22;Q80T84	Mroh1	Maestro heat-like repeat family member 1	E0CZ22_MOUSE	16	6507.36	6485.57	7278.43	7362.29	7036.96	7011.73	5386.77	6338.14
E2JF22	Piezo-type mechanosensitive ion channel component 1	Piezo1	E2JF22	E2JF22;E9PUQ9;F7AC58;Q3UM62;Q6ZQF9;Q80XT7;F6PYU5;Q811I7	Piezo1	Piezo-type mechanosensitive ion channel component 1	PIEZ1_MOUSE	12	8716.49	9241.8	11423.4	9801.8	11999.7	12801.4	12287.7	10273.1
E5RKB6	FELE-1	Stab1	E5RKB6;E5RKB7;G3X973;Q3UEV6;Q6PDN4	E5RKB6;G3X973;E5RKB7;Q3UEV6;Q6PDN4	Stab1	FELE-1	E5RKB6_MOUSE;E5RKB7_MOUSE;G3X973_MOUSE;Q3UEV6_MOUSE;Q6PDN4_MOUSE	1	8689.2	5122.15	6535.96	8568.73	7739.08	8559.76	9127.71	10397.2
E9PUL7	N-acetyltransferase 8 (GCN5-related) family member 1	Nat8f1	E9PUL7	Q9JIZ0;E9PUL7;G3UWY7	Nat8f1	N-acetyltransferase 8 (GCN5-related) family member 1	E9PUL7_MOUSE	7	36685.3	50158.1	51693.1	46545.8	26157.3	25954.7	27138.2	24039.9
E9PUN6	ADAM metallopeptidase with thrombospondin type 1 motif 9	Adamts9	E9PUN6	E9PUN6;E9PYV8;Q69ZM2;Q8CDB8	Adamts9	ADAM metallopeptidase with thrombospondin type 1 motif 9	E9PUN6_MOUSE	3	6842.96	6349.74	7058.45	6087.13	5396.78	5496.02	5842.83	8090.63
E9PUQ8	Diacylglycerol kinase delta	Dgkd	E9PUQ8	D3YXJ0;E9PUQ8;A0A2I3BQ43;A0A2I3BQ48;A0JP53;Q6A0B7;A0A2I3BQA6	Dgkd	Diacylglycerol kinase delta	DGKD_MOUSE	2	2951.67	4090.96	3302.78	3317.76	3798.17	3704.84	4601.2	2493.46
E9PV24	Fibrinogen alpha chain	Fga	E9PV24	E9PV24	Fga	Fibrinogen alpha chain	FIBA_MOUSE	26	433803	341050	454368	441336	328027	333034	314369	383487
E9PV38	Carboxylic ester hydrolase	Ces2g	E9PV38;Q8R097	E9PV38;Q6PDB7;Q8R097	Ces2g	Carboxylic ester hydrolase	E9PV38_MOUSE;Q8R097_MOUSE	3	5381.57	4533.37	4363.55	4772.38	5294.25	7245.13	3338.02	3824.77
E9PV44	ATPase inhibitor, mitochondrial	Atp5if1	E9PV44	E9PV44	Atp5if1	ATPase inhibitor, mitochondrial	E9PV44_MOUSE	2	26921.9	31042.5	23405.7	27123.5	22474.6	26901.2	29996.7	21234.6
E9PVA6	GIT ArfGAP 2	Git2	E9PVA6	E9PVA6;F6U8T2	Git2	GIT ArfGAP 2	E9PVA6_MOUSE	2	7276.9	5268.8	5533.98	6518.9	4605.6	6470.53	5363	6139.07
E9PVA8	Stalled ribosome sensor GCN1	Gcn1	E9PVA8	E9PVA8;Q3UHQ5;Q6PGM5;Q8BIX2;Q8CHH7	Gcn1	Stalled ribosome sensor GCN1	GCN1_MOUSE	77	61414.5	56697.5	60978	65207.2	60904.8	53808.6	48793.8	52751.5
E9PVD3	Protocadherin-16	Dchs1	E9PVD3	E9PVD3	Dchs1	Protocadherin-16	PCD16_MOUSE	2	1624.64	1971.74	1947.28	1214.78	2485.46	1207.04	1364.9	1710
E9PW83	Family with sequence similarity 184, member A	Fam184a	E9PW83;F6TU77;Q9D5H9	E9PW83;F6TU77;Q9D5H9	Fam184a	Family with sequence similarity 184, member A	E9PW83_MOUSE;F6TU77_MOUSE;Q9D5H9_MOUSE	1				931.088		1643.57	1024.26
E9PWE8	Dihydropyrimidinase-like 3	Dpysl3	E9PWE8;Q71H74	E9PWE8;Q71H74	Dpysl3	Dihydropyrimidinase-like 3	E9PWE8_MOUSE;Q71H74_MOUSE	1	6357.59	5448.58	8358.39	8707.54	5046.14	4418.07	3088.02	4290.01
E9PWQ3	Collagen, type VI, alpha 3	Col6a3	E9PWQ3	E9PWQ3;J3QQ16;A0A087WS16;O88493;Q05504	Col6a3	Collagen, type VI, alpha 3	E9PWQ3_MOUSE	129	404378	384727	322002	313840	395006	401776	367863	381054
E9PWW5	ADAMTS-like 1	Adamtsl1	E9PWW5	E9PWW5	Adamtsl1	ADAMTS-like 1	E9PWW5_MOUSE	1	10305.4	4775.95	8905.47	8943.09	11985	15132.7	8342.23	9219.89
E9PWW9	Remodeling and spacing factor 1	Rsf1	E9PWW9;Q3UJ04;Q3V3T8	E9PWW9;Q3UJ04;Q3V3T8;Q3UK64	Rsf1	Remodeling and spacing factor 1	E9PWW9_MOUSE;Q3UJ04_MOUSE;Q3V3T8_MOUSE	7	72305.8	51711.4	56636.6	72364.6	68675.8	60501.5	74368.8	61979.4
E9PX43	Pleckstrin homology domain containing, family A member 6	Plekha6	E9PX43;Q69ZU4	E9PX43;Q69ZU4	Plekha6	Pleckstrin homology domain containing, family A member 6	E9PX43_MOUSE;Q69ZU4_MOUSE	1	1556.92	1104.21	2171.03		1751.54	1577.14	941.47	1241.15
E9PX68	Solute carrier family 4 (anion exchanger), member 1, adaptor protein	Slc4a1ap	E9PX68;E9Q1Q0;E9Q585;Q3UUI2;Q6GQW1	E9PX68;E9Q1Q0;E9Q585;Q3UUI2;Q6GQW1	Slc4a1ap	Solute carrier family 4 (anion exchanger), member 1, adaptor protein	E9PX68_MOUSE;E9Q1Q0_MOUSE;E9Q585_MOUSE;Q3UUI2_MOUSE;Q6GQW1_MOUSE	9	6608.38	5949.82	5801.03	7480.58	7976.94	6853.86	6679.47	6528.37
E9PX95	ATP-binding cassette sub-family A member 17	Abca17	E9PX95	E9PX95	Abca17	ATP-binding cassette sub-family A member 17	ABCAH_MOUSE	1		8541.19			13670.6	13485.3
E9PXF8	Myotubularin-related protein 13	Sbf2	E9PXF8	E9PXF8;E9Q0D4;E9Q372;F6QZ02;Q6NX80;Q80ZM6;Q8BX53	Sbf2	Myotubularin-related protein 13	MTMRD_MOUSE	5	7112.26	9014.1	7321	7804.88	6370.96	6588.44	6341.93	7327.97
E9PXN7	UDP-glucuronosyltransferase	Ugt1a10	E9PXN7;Q5FW80	Q62452;E9PXN7;Q5FW80;Q6XL43	Ugt1a10	UDP-glucuronosyltransferase	E9PXN7_MOUSE;Q5FW80_MOUSE	9	11164.8	7587.75	6765.15	8374.55	17502.1	30530	27757.2	22625.2
E9PXY8	Ubiquitin carboxyl-terminal hydrolase 7	Usp7	E9PXY8;F8VPX1	E9PXY8;F8VPX1	Usp7	Ubiquitin carboxyl-terminal hydrolase 7	E9PXY8_MOUSE;F8VPX1_MOUSE	1	11557.8	11418.1	9889.28	10230.2	7484.04	9785.89	11329.2	10152.7
E9PY03	Thiosulfate sulfurtransferase (rhodanese)-like domain containing 1	Tstd1	E9PY03	E9PY03	Tstd1	Thiosulfate sulfurtransferase (rhodanese)-like domain containing 1	E9PY03_MOUSE	2	4895.73	9017.18	6655.14	8031.62	3296.28	3810.04	2962.41	3142.85
E9PY46	Intraflagellar transport protein 140 homolog	Ift140	E9PY46	E9PY46;A0A3B2W3F6;E9Q682;Q3TQ94;Q6ZQ91	Ift140	Intraflagellar transport protein 140 homolog	IF140_MOUSE	3	9163.65	9029.07	8290.26	8818.85	9291.76	9636.73	7310.61	7364.94
E9PY62	Contactin associated protein-like 3	Cntnap3	E9PY62	E9PY62;Q3URC6	Cntnap3	Contactin associated protein-like 3	E9PY62_MOUSE	2	2324.59	3345.67	2731.95	3237.28	3151.11	2226.6	3317.41	3924.57
E9PYD1	Family with sequence similarity 98, member C	Fam98c	E9PYD1	D3Z100;E9PYD1;F6S0H0	Fam98c	Family with sequence similarity 98, member C	E9PYD1_MOUSE	6	7268.82	7386.49	6718.37	7623.8	8579.64	8181.18	8170.47	7756.64
E9PYG6	RAS p21 protein activator 1	Rasa1	E9PYG6;Q91YX7	E9PYG6;Q3V090;Q91YX7	Rasa1	RAS p21 protein activator 1	E9PYG6_MOUSE;Q91YX7_MOUSE	14	16107.7	14680.5	16284.7	13756.9	13642.9	14687.8	14404.3	13559.2
E9PYH6	Histone-lysine N-methyltransferase SETD1A	Setd1a	E9PYH6	E9PYH6;D3YUD4;D3YX07;D3YXL2	Setd1a	Histone-lysine N-methyltransferase SETD1A	SET1A_MOUSE	1			2920.19	2289.47	2314.71	1875.15
E9PYK3	Protein mono-ADP-ribosyltransferase PARP4	Parp4	E9PYK3	E9PYK3	Parp4	Protein mono-ADP-ribosyltransferase PARP4	PARP4_MOUSE	29	17464	18184.1	17611.8	17238.6	17056.6	17487.3	17739.1	18943.1
E9PYL2	Proline-rich protein 12	Prr12	E9PYL2	E9PYL2;Q6PDJ2	Prr12	Proline-rich protein 12	PRR12_MOUSE	2	3221.3		1479.56	2644.72	3547.03	2451.02	3197.22	2797.85
E9PYP2	Neurobeachin like 1	Nbeal1	E9PYP2	E9PV03;E9PYP2;F7BJ98	Nbeal1	Neurobeachin like 1	E9PYP2_MOUSE	22	14224.1	11766	12527.9	11796.5	13955.7	13848.2	13951.6	13536
E9PZ00	Prosaposin	Psap	E9PZ00;Q3TID4;Q3TIT5;Q3TKB2;Q3TKK3;Q3TWF9;Q3TWL8;Q3TWM9;Q3TXJ0;Q3TXP9;Q3U5W2;Q3U825;Q3U897;Q3U8C4;Q3UE29;Q8BFQ1	E9PZ00;Q8BFQ1;Q3TID4;Q3TIT5;Q3TKB2;Q3TKK3;Q3TWF9;Q3TWL8;Q3TWM9;Q3TXJ0;Q3TXP9;Q3U5W2;Q3U825;Q3U897;Q3U8C4;Q3UE29	Psap	Prosaposin	E9PZ00_MOUSE;Q3TID4_MOUSE;Q3TIT5_MOUSE;Q3TKB2_MOUSE;Q3TKK3_MOUSE;Q3TWF9_MOUSE;Q3TWL8_MOUSE;Q3TWM9_MOUSE;Q3TXJ0_MOUSE;Q3TXP9_MOUSE;Q3U5W2_MOUSE;Q3U825_MOUSE;Q3U897_MOUSE;Q3U8C4_MOUSE;Q3UE29_MOUSE;Q8BFQ1_MOUSE	2	7433.3	11694.7	11628.8	14401.3	37748.5	44419.4	43894.8	35583.2
E9PZ16	Perlecan (heparan sulfate proteoglycan 2)	Hspg2	E9PZ16	E9PZ16;B1B0C7;Q3UHH3	Hspg2	Perlecan (heparan sulfate proteoglycan 2)	E9PZ16_MOUSE	27	378368	400143	349399	368671	330908	345459	345680	348439
E9PZ36	Fibrocystin	Pkhd1	E9PZ36	E9PZ36;Q6T3A5;Q8CIS7	Pkhd1	Fibrocystin	PKHD1_MOUSE	15	7087.26	5273.24	5932.56	6031.37	6320.84	6269.69	5459.4	5747.96
E9PZJ8	Activating signal cointegrator 1 complex subunit 3	Ascc3	E9PZJ8	E9PZJ8	Ascc3	Activating signal cointegrator 1 complex subunit 3	ASCC3_MOUSE	27	11370.5	10831.1	11305.5	8872.8	12961.6	11231.2	10228.8	11869.1
E9PZM4	Chromodomain-helicase-DNA-binding protein 2	Chd2	E9PZM4	E9PZM4	Chd2	Chromodomain-helicase-DNA-binding protein 2	CHD2_MOUSE	3	5926.75	6646.28	8530.04	7349.54	7621.31	7823.61	8731.14	7101.8
E9PZP8	HECT and RLD domain containing E3 ubiquitin protein ligase family member 1	Herc1	E9PZP8	E9PZP8;Q8BNF7	Herc1	HECT and RLD domain containing E3 ubiquitin protein ligase family member 1	E9PZP8_MOUSE	14	22503	19639.2	22137.6	19499.8	18884.8	19694.6	21347.9	19537.6
E9PZQ1	DExD/H box helicase 60	Ddx60	E9PZQ1;G3X9F7	E9PZQ1;G3X9F7;Q91VI2	Ddx60	DExD/H box helicase 60	E9PZQ1_MOUSE;G3X9F7_MOUSE	4	3383.06	6263.94	3781.71	4870.62	3952.72	4937.73	4901.37	6067.41
E9Q0A3	Rho guanine nucleotide exchange factor 11 (Fragment)	Arhgef11	E9Q0A3;Q3U048;Q68FM7	E9Q0A3;Q3U048;Q5DU33;Q68FM7	Arhgef11	Rho guanine nucleotide exchange factor 11 (Fragment)	E9Q0A3_MOUSE;Q3U048_MOUSE;Q68FM7_MOUSE	5	4381.33	4094.54	4741.68	4313.47	4757.32	4370.31	4565.04	4248.54
E9Q0S6	Tensin-1	Tns1	E9Q0S6	E9Q0S6;A0A6I8MWZ2;Q3U0Q9;A0A087WQ94;A0A087WQM0;A0A087WQS0;A0A087WRU0;A0A1D5RM59;Q7TPM8;Q7TSV1;Q9DBT6	Tns1	Tensin-1	TENS1_MOUSE	45	166821	204285	160035	169892	208354	216201	212797	194796
E9Q0Y4	Signal-induced proliferation associated gene 1	Sipa1	E9Q0Y4;Q3UE96;Q3UV58	E9Q0Y4;Q3U146;Q3UE96;Q3UV58;Q5DTP8;Q7TMS2	Sipa1	Signal-induced proliferation associated gene 1	E9Q0Y4_MOUSE;Q3UE96_MOUSE;Q3UV58_MOUSE	3	10056.7	7800.14	10907.3	12722.7	10298.8	10211.2	8937.73	8795.92
E9Q137	Testis-expressed protein 264 homolog	Tex264	E9Q137	E9Q137	Tex264	Testis-expressed protein 264 homolog	TX264_MOUSE	7	29843.5	29495	28999.9	31850.4	29155.4	28452.5	27819.5	24871.5
E9Q166	ATPase family, AAA domain containing 2B	Atad2b	E9Q166	E9Q166;Q8C3P6	Atad2b	ATPase family, AAA domain containing 2B	E9Q166_MOUSE	17	9066.44	7189.85	7210.29	7487.71	8103.69	8755.98	8254.51	8273.07
E9Q174	Unconventional myosin-VI	Myo6	E9Q174;Q6A077;V9GX76	V9GX76;E9Q174;Q6A077	Myo6	Unconventional myosin-VI	E9Q174_MOUSE;Q6A077_MOUSE;V9GX76_MOUSE	2	21559.6	23944.1	23914.7	19916.5	33117.1	33744	29413.7	25912.3
E9Q1L2	Kelch-like 5	Klhl5	E9Q1L2;E9QA66;Q571J4;Q6PFE1	E9Q1L2;E9QA66;Q571J4;Q6PFE1;Q8BTI0	Klhl5	Kelch-like 5	E9Q1L2_MOUSE;E9QA66_MOUSE;Q571J4_MOUSE;Q6PFE1_MOUSE	3	3716.9	3919.64	4547.39	4474.58	3968.61	4284.42	4185.84	4740.71
E9Q1P8	Interferon regulatory factor 2-binding protein 2	Irf2bp2	E9Q1P8	E9Q1P8	Irf2bp2	Interferon regulatory factor 2-binding protein 2	I2BP2_MOUSE	2	4311	2770.41	2646.96	3253.67	5666.47	2736.05	4759.94	3402.72
E9Q236	ATP-binding cassette sub-family C member 4	Abcc4	E9Q236	E9Q236;B9EKC2;E9Q467	Abcc4	ATP-binding cassette sub-family C member 4	MRP4_MOUSE	19	14028.7	14982.9	14864.5	13580.6	11398.4	11986.7	12770	11914.9
E9Q238	KN motif and ankyrin repeat domains 1	Kank1	E9Q238	E9Q238;A7MCX9;E9Q944;Q6AXG6;Q80U69	Kank1	KN motif and ankyrin repeat domains 1	KANK1_MOUSE	8	8512.99	6250.34	7566.22	6360.25	8618.12	7275.1	9074.83	8939.24
E9Q2E4	HECT domain E3 ubiquitin protein ligase 4	Hectd4	E9Q2E4	E9Q2E4	Hectd4	HECT domain E3 ubiquitin protein ligase 4	E9Q2E4_MOUSE	16	7191.86	6819.79	6515.65	7137.69	6433.98	7791.47	6225.27	6242.32
E9Q2M9	WD repeat- and FYVE domain-containing protein 4	Wdfy4	E9Q2M9	E9Q2M9;E9PV60;Q3U2N8;Q69ZF2	Wdfy4	WD repeat- and FYVE domain-containing protein 4	WDFY4_MOUSE	27	13309	11303.3	13247.5	12883.9	11550.1	10046.1	10186.2	10556.7
E9Q394	A-kinase anchor protein 13	Akap13	E9Q394	E9Q394;A0A140LJJ5;Q3UZK5;A0A140LHG3	Akap13	A-kinase anchor protein 13	AKP13_MOUSE	19	9675.23	8294.85	8759.76	8704.96	9516.77	9911.71	9797.84	9573.87
E9Q3C1	C2 domain-containing protein 2	C2cd2	E9Q3C1	E9Q3C1;A0A338P7E6	C2cd2	C2 domain-containing protein 2	C2CD2_MOUSE	3	5894.36	7118.56	5820.99	6187.53	7606.16	8504.72	8481.57	8065.08
E9Q3G8	Nucleoporin 153	Nup153	E9Q3G8;Q80WR0	E9Q3G8;Q80WR0	Nup153	Nucleoporin 153	E9Q3G8_MOUSE;Q80WR0_MOUSE	4	8245.63	10878.4	10164.5	9254.24	11514	12153.9	9979.97	8368.35
E9Q3L2	Phosphatidylinositol 4-kinase alpha	Pi4ka	E9Q3L2	E9Q3L2;A0A140T8I9;A0A1S6GWJ7	Pi4ka	Phosphatidylinositol 4-kinase alpha	PI4KA_MOUSE	51	19370.1	20512	19319.7	19811	17788.9	16813.3	17147	17935.3
E9Q3M9	Capping protein inhibiting regulator of actin like	Cracdl	E9Q3M9;Q6GQT3	E9Q3M9;Q6GQT3	Cracdl	Capping protein inhibiting regulator of actin like	E9Q3M9_MOUSE;Q6GQT3_MOUSE	1	6671.96	5332.05	6335.36	8159.71	5916.01	6823.02	8781.48	6729.73
E9Q3V2	UDP-N-acetylglucosamine transporter (Fragment)	Slc35a3	E9Q3V2	E9Q3V2	Slc35a3	UDP-N-acetylglucosamine transporter (Fragment)	E9Q3V2_MOUSE	4	18097.3	11989.3	16222.1	14117.8	16472.9	18652.8	12646	12825.4
E9Q411	Neuroblastoma amplified sequence	Nbas	E9Q411	E9Q411;Q3UJX6;Q6GQV6;Q6PGH6;Q80XK8	Nbas	Neuroblastoma amplified sequence	E9Q411_MOUSE	17	8469.33	5870.81	6890.49	6829.29	7513.38	7143.89	6192	6265.01
E9Q414	Apolipoprotein B-100	Apob	E9Q414	E9Q414;E9Q1Y3	Apob	Apolipoprotein B-100	APOB_MOUSE	41	10513.6	9075.5	12482	12927	7501.54	8690.18	7374.88	10072.1
E9Q448	Tropomyosin 1, alpha	Tpm1	E9Q448	A0A2R2Y2P8;F8WID5;B7ZNL3;E9Q448	Tpm1	Tropomyosin 1, alpha	E9Q448_MOUSE	12	118336	127426	108364	129742	130883	139374	140201	138460
E9Q481	SMEK homolog 1	Ppp4r3a	E9Q481	E9Q481	Ppp4r3a	SMEK homolog 1	E9Q481_MOUSE	1	923.534	1913.24	1458.92	1305.65	1409.83	1154.83	1537.82	1212.99
E9Q4N7	AT-rich interactive domain-containing protein 1B	Arid1b	E9Q4N7	E9Q4N7;E9Q6R4;A0A338P6U8;A0A8Q0PK87;E9Q4N6	Arid1b	AT-rich interactive domain-containing protein 1B	ARI1B_MOUSE	10	18776.8	16904.2	19287	17566.7	18089.8	19038.5	19231.5	19157.9
E9Q4P1	WD repeat and FYVE domain-containing protein 1	Wdfy1	E9Q4P1	E9Q4P1;Q8R3I5	Wdfy1	WD repeat and FYVE domain-containing protein 1	WDFY1_MOUSE	13	8137	39300.8	36675.4	22737.7		3029.65
E9Q4X2	UDP-glucose glycoprotein glucosyltransferase 2	Uggt2	E9Q4X2	E9Q4X2;F6YNY8;Q8BI80	Uggt2	UDP-glucose glycoprotein glucosyltransferase 2	E9Q4X2_MOUSE	3	3031.95	1651.05	2129.31	1606.48	2264.8	3850.98	3211.8	2990.78
E9Q4Y4	Centrosomal protein 192	Cep192	E9Q4Y4;Q80TB9	E9Q4Y4;Q9D694;Q6P2K8;Q7TMP0;Q80TB9	Cep192;mKIAA1569	Centrosomal protein 192	E9Q4Y4_MOUSE;Q80TB9_MOUSE	1	1516.12	873.982	1478.63		1132.23	1244.06		601.628
E9Q4Z2	Acetyl-CoA carboxylase 2	Acacb	E9Q4Z2	E9Q4Z2;Q3UHC8;Q8R5C9	Acacb	Acetyl-CoA carboxylase 2	ACACB_MOUSE	3	4496.27	5060.36	4754.77	5540.83	3234.13	4010.26	3668.69	5340.63
E9Q555	E3 ubiquitin-protein ligase RNF213	Rnf213	E9Q555	E9Q555;A0A171EBL2;A0A8I4P9C4	Rnf213	E3 ubiquitin-protein ligase RNF213	RN213_MOUSE	135	28935.8	23987.5	31465.1	31055.5	54212.8	37252.4	27127.7	27246.7
E9Q557	Desmoplakin	Dsp	E9Q557	E9Q557;E9PZW0	Dsp	Desmoplakin	DESP_MOUSE	62	13672.2	13498.5	12714.4	12986.6	14198.9	14541.4	13188.9	14892.1
E9Q5C9	Nucleolar and coiled-body phosphoprotein 1	Nolc1	E9Q5C9	E9Q5C9;A0A286YCD1;A0A286YDA2;A0A286YDT3;A0A286YDV7;A0A286YDZ1	Nolc1	Nucleolar and coiled-body phosphoprotein 1	NOLC1_MOUSE	5	2847.05	2464.58		1948.27	6327.53	4107.23	4140.72	4859.04
E9Q5D9	Insulin-like growth factor binding protein 7	Igfbp7	E9Q5D9	E9Q5D9	Igfbp7	Insulin-like growth factor binding protein 7	E9Q5D9_MOUSE	1	36365.6	31049.8	38216.9	36224.8	85371.7	97095.9	99101.5	86190.3
E9Q5F9	Histone-lysine N-methyltransferase SETD2	Setd2	E9Q5F9	E9Q5F9;A0A0G2JDY1;A0A0G2JH06	Setd2	Histone-lysine N-methyltransferase SETD2	SETD2_MOUSE	2	4112.15	3421.69	3091.98	3454.44	3500.64	4566.73	3163.93	3159.49
E9Q5K4	Cytochrome P450 2C44	Cyp2c23	E9Q5K4	E9Q5K4;Q3UEM4;Q8CIE7	Cyp2c23	Cytochrome P450 2C44	CP2CN_MOUSE	1		2767.46
E9Q5K9	YTH domain-containing protein 1	Ythdc1	E9Q5K9	E9Q5K9;Q8C4W4	Ythdc1	YTH domain-containing protein 1	YTDC1_MOUSE	6	7425.27	6263.51	8450.11	8735.94	7876.24	6193.52	6660.39	7152.11
E9Q612	Receptor-type tyrosine-protein phosphatase O	Ptpro	E9Q612	E9Q612;E9Q4I1;Q68FL5;Q6P4T4;Q80W11;Q9ERM5;Q9JLU0;A0A0N4SUY2;E9PVJ6;Q4U213;Q4U214;Q60998	Ptpro	Receptor-type tyrosine-protein phosphatase O	PTPRO_MOUSE	3	3037.36	4018.55	2635.02	4459.77	4750.23	3174.97	3468.73	4156.36
E9Q616	AHNAK nucleoprotein	Ahnak	E9Q616	E9Q616;A0A494BBD5;Q8BRB8	Ahnak	AHNAK nucleoprotein	E9Q616_MOUSE	145	259768	199173	215312	265933	324745	330996	309515	302153
E9Q634	Unconventional myosin-Ie	Myo1e	E9Q634	E9Q634;Q8C123;A0A1L1STM1	Myo1e	Unconventional myosin-Ie	MYO1E_MOUSE	19	23286	20964.8	24037.2	25563.5	24929.6	25063.8	24440.5	24096.6
E9Q6B2	Coiled-coil domain-containing protein 85C	Ccdc85c	E9Q6B2	E9Q6B2;A0A217FL83	Ccdc85c	Coiled-coil domain-containing protein 85C	CC85C_MOUSE	3	3997.92	4576.55	4491.26	3880.85	3848.7	3015.49	3537.92	2682.61
E9Q6D8	Complement component C6	C6	E9Q6D8;Q91X70;Q9QXT7	E9Q6D8;Q91X70;Q9QXT7	C6	Complement component C6	E9Q6D8_MOUSE;Q91X70_MOUSE;Q9QXT7_MOUSE	11	6301.42	5499.55	9130.43	9807.57	6530.59	5909.26	3896.2	4903.73
E9Q6E5	Serine and arginine-rich splicing factor 11	Srsf11	E9Q6E5;F6RDI8;Q3UIX4	D3Z4B0;D6RE22;E9Q6E5;F6RDI8;F6TN80;Q3TR16;Q3UIX4;Q5XJE4;Q6NSR2;Q8BYD3;Q8C0Z3;Q8CFF2;Q8CGI3;Q9CT17	Srsf11	Serine and arginine-rich splicing factor 11	E9Q6E5_MOUSE;F6RDI8_MOUSE;Q3UIX4_MOUSE	4	27430.6	27725	25215.2	37087.7	40867.9	36219.7	37286.7	38085.3
E9Q6J5	Biorientation of chromosomes in cell division protein 1-like 1	Bod1l	E9Q6J5	E9Q6J5	Bod1l	Biorientation of chromosomes in cell division protein 1-like 1	BD1L1_MOUSE	2	5336.81		3893.17	4776.32	6279.23	4687.69	6493.62	5613.63
E9Q6L7	Glutathione S-transferase	Gsta5	E9Q6L7	P10648;P13745;D3YZV3;D3Z6A6;E9Q6L7;Q6P8Q0;Q8K0V9;Q7M0B9	Gsta5	Glutathione S-transferase	E9Q6L7_MOUSE	18	784425	935382	737724	570378	841374	924640	876259	837684
E9Q6M5	Solute carrier family 22 (organic cation transporter), member 26	Slc22a26	E9Q6M5;Q8VDE6;Q91WJ2	Q76M72;Q8BWE8;B2RT89;E9PVA5;E9Q6M5;Q3V3G0;Q7TNX9;Q810T7;Q8VDE6;Q91WJ2;Q96LX3	Slc22a26	Solute carrier family 22 (organic cation transporter), member 26	E9Q6M5_MOUSE;Q8VDE6_MOUSE;Q91WJ2_MOUSE	4	5366.13	7077.23	6986.36	4866.69	3323.27	2670.5	3337.72	2345.21
E9Q6P5	Tetratricopeptide repeat protein 7B	Ttc7b	E9Q6P5	E9Q6P5;A0A1Y7VL44;A0A1Y7VLT4	Ttc7b	Tetratricopeptide repeat protein 7B	TTC7B_MOUSE	4	10818.6	17443.4	13248.2	11420.8	9261.49	9103.88	12564.9	12804.6
E9Q6R7	Utrophin	Utrn	E9Q6R7	E9Q6R7;O08614	Utrn	Utrophin	E9Q6R7_MOUSE	110	52503.6	52273.7	48935.4	54078.8	51869.6	53619.8	52821.1	53984.4
E9Q6U4	Prefoldin subunit 4	Pfdn4	E9Q6U4;Q3UWL8	E9Q6U4;Q3UWL8;E9Q4Q8;E9Q8R1;Q6P0X1	Pfdn4	Prefoldin subunit 4	E9Q6U4_MOUSE;Q3UWL8_MOUSE	2	16309.2	16953	16870.2	16254.1	18474.6	17659.8	17797.4	14327.9
E9Q735	Ubiquitin conjugation factor E4 A	Ube4a	E9Q735	E9Q735;G3X9Y5;Q6A0C5;I6L960	Ube4a	Ubiquitin conjugation factor E4 A	UBE4A_MOUSE	13	20975.5	20020.4	20447.9	24618.9	18976.1	18881.1	18250.6	18336
E9Q777	A kinase anchor protein 11	Akap11	E9Q777	E9Q777;Q8BSJ2	Akap11	A kinase anchor protein 11	E9Q777_MOUSE	3	11269	19136.9	21977.2	17229.2	17775.9	20273.1	18603.9	15211.7
E9Q784	Zinc finger CCCH domain-containing protein 13	Zc3h13	E9Q784	E9Q784;A0A2I3BPQ5	Zc3h13	Zinc finger CCCH domain-containing protein 13	ZC3HD_MOUSE	6	3073.39	3859.01	2876.45	4623.37	4070.93	4174.7	5242.93	4087.7
E9Q7C0	RIKEN cDNA 1700030K09 gene	1700030K09Rik	E9Q7C0	E9Q7C0;Q922C1	1700030K09Rik	RIKEN cDNA 1700030K09 gene	E9Q7C0_MOUSE	1	18862.3	19876	12452.8	16917.3	16114.8	13676.2	20172.4	14590.2
E9Q7D5	Rho guanine nucleotide exchange factor 5	Arhgef5	E9Q7D5	E9Q7D5;S4R1F1	Arhgef5	Rho guanine nucleotide exchange factor 5	ARHG5_MOUSE	5	3387.58	3622.2	3911.67	4232.84	2745.96	2961.07	2357.31	3222.91
E9Q7E2	AT-rich interactive domain-containing protein 2	Arid2	E9Q7E2	E9Q7E2	Arid2	AT-rich interactive domain-containing protein 2	ARID2_MOUSE	7	5559.99	5369.65	5748.13	5342.56	6758.03	5424.9	6159.7	6581.04
E9Q7G0	Nuclear mitotic apparatus protein 1	Numa1	E9Q7G0	E9Q7G0;F6ZQA3;Q3UNM2	Numa1	Nuclear mitotic apparatus protein 1	NUMA1_MOUSE	68	45712.2	46810.6	41942.3	47182.4	47073	45304.1	48803	45821.4
E9Q7L1	URB2 ribosome biogenesis 2 homolog (S. cerevisiae)	Urb2	E9Q7L1	B9EKU4;E9Q7L1;Q80U74	Urb2	URB2 ribosome biogenesis 2 homolog (S. cerevisiae)	E9Q7L1_MOUSE	2	5240.14	5850.06	5475.42	6358.42	4262.36	5523.58	8449.33	5379.77
E9Q7M2	TSC22 domain family protein 2	Tsc22d2	E9Q7M2	E9Q7M2	Tsc22d2	TSC22 domain family protein 2	T22D2_MOUSE	3	3341.28	4175.13	4105.85	2879.83	5596.67	4107.21	3712.27	4257.1
E9Q7P9	Cadherin-related family member 2	Cdhr2	E9Q7P9	E9Q7P9	Cdhr2	Cadherin-related family member 2	CDHR2_MOUSE	9	11409.4	12727.3	16074.7	9848.47	8883.64	11186.4	10141.4	8137.49
E9Q7Q7	Rhophilin, Rho GTPase binding protein 1	Rhpn1	E9Q7Q7;Q5DTT9	E9Q7Q7;Q5DTT9	Rhpn1	Rhophilin, Rho GTPase binding protein 1	E9Q7Q7_MOUSE;Q5DTT9_MOUSE	1	3434.51	4817.61	5859.43	13708.2	3318.36	2676.03
E9Q7X6	Protein HEG homolog 1	Heg1	E9Q7X6	E9Q7X6;A0A338P6D4;E9Q440;Q6DFX1	Heg1	Protein HEG homolog 1	HEG1_MOUSE	1	4012.03	3882.44	2130.5	4427.03	3272.23	2782.94	4582.75	5610.29
E9Q852	Afadin, adherens junction formation factor	Afdn	E9Q852	E9Q852	Afdn	Afadin, adherens junction formation factor	E9Q852_MOUSE	1	2636.94	3630.89	2962.35	3916.27	2861.28	1569.38	3853.34	2351.19
E9Q8D0	DnaJ homolog subfamily C member 21	Dnajc21	E9Q8D0	E9Q8D0;Q3URP7	Dnajc21	DnaJ homolog subfamily C member 21	DJC21_MOUSE	1	2915.9	2547.09	1461.89	3259.65	3057.83	3717.64	2152.47	3157.91
E9Q8I7	Nuclear transcription factor, X-box binding-like 1	Nfxl1	E9Q8I7	A2AEI4;A2AEI5;E9Q8I7;F7AR15;Q80SZ6;Q99JG5;Q99JG6	Nfxl1	Nuclear transcription factor, X-box binding-like 1	E9Q8I7_MOUSE	9	18509.9	14954.4	15851.3	15638.6	21450	19092.3	20206.5	17839.4
E9Q8M1	Zinc finger protein 358	Zfp358	E9Q8M1;Q6PI88;Q923T4	Q923T4;E9Q8M1;Q6PI88	Zfp358	Zinc finger protein 358	E9Q8M1_MOUSE;Q6PI88_MOUSE;Q923T4_MOUSE	2	1241.08	1230.59	1541.17	2899.1	1628.9	2229.54	2259.35	1629.3
E9Q8Q6	Coiled-coil domain-containing protein 141	Ccdc141	E9Q8Q6	E9Q8Q6;Q8BLD3;Q8BLW1;Q9D003	Ccdc141	Coiled-coil domain-containing protein 141	CC141_MOUSE	5	7105.7	6631.69	6043.39	6984.2	5809.44	8138.1	7108.47	6538.19
E9Q8T1	Transforming, acidic coiled-coil containing protein 2	Tacc2	E9Q8T1	E9Q8T1;A0A140LHH8;A0A1L1SS37;Q2VPC8	Tacc2	Transforming, acidic coiled-coil containing protein 2	E9Q8T1_MOUSE	5	4668.78	4825.91	5202.85	5228.27	6764.32	5264.26	6138.66	4323.24
E9Q912	Rap1 GTPase-GDP dissociation stimulator 1	Rap1gds1	E9Q912	E9Q912;A0A0G2JGC8;Q8BKH0	Rap1gds1	Rap1 GTPase-GDP dissociation stimulator 1	GDS1_MOUSE	21	17435.6	13407.3	19201.4	19552.5	20178.3	17719	16948.4	16660.1
E9Q9A9	2'-5'-oligoadenylate synthase 2	Oas2	E9Q9A9	E9Q9A9	Oas2	2'-5'-oligoadenylate synthase 2	OAS2_MOUSE	2	687.323		667.612	568.417	2064	1285.88	631.177	720.241
E9Q9B3	SPRY domain containing 3	Spryd3	E9Q9B3;Q922G6	E9Q9B3;Q3UIZ3;Q922G6	Spryd3	SPRY domain containing 3	E9Q9B3_MOUSE;Q922G6_MOUSE	6	13186.4	17021.9	21585.8	17584.4	19128.2	19767.8	19938.8	19869.6
E9Q9D5	Rab-like protein 2A	Rabl2	E9Q9D5	E9Q9D5;E9PZU3	Rabl2	Rab-like protein 2A	RBL2A_MOUSE	1	1094.47	1443.21	1315.21	1591.64	1092.3	1216.07	1482.06	871.068
E9Q9R9	Disks large homolog 5	Dlg5	E9Q9R9	E9Q9R9;F6YZU5;Q6NXJ3;E9Q9I2;Q3UH41	Dlg5	Disks large homolog 5	DLG5_MOUSE	2	2493.68	4114.57	4503.26	5285.18	6443.03	5007.41	5808.44	3846.31
E9QA15	Caldesmon 1	Cald1	E9QA15	D3Z6I7;E9Q0M9;E9Q9F3;E9QA15;E9QA16;Q3TUS1;Q3UGC3;Q7TMN5;Q8VCQ8;S4R1T7	Cald1	Caldesmon 1	E9QA15_MOUSE	31	99390.2	90867	85180.4	100453	96782	97768.5	96639.8	91665
E9QAM5	3'-5' exoribonuclease HELZ2	Helz2	E9QAM5	E9QAM5;A2AS03;Q3TZD5;A2AS05;Q69ZA7	Helz2	3'-5' exoribonuclease HELZ2	HELZ2_MOUSE	11	5817.02	6698.7	6095.73	7264.24	8098.64	6524.36	5715.19	5213.49
E9QAT4	Protein transport protein Sec16A	Sec16a	E9QAT4	E9QAT4;F7BPW6	Sec16a	Protein transport protein Sec16A	SC16A_MOUSE	11	30897.5	32357.3	36529.1	34933	32427.5	32082.1	31001.1	32815.5
E9QB01	Neural cell adhesion molecule 1	Ncam1	E9QB01;O88682	E9QB01;O88682	Ncam1	Neural cell adhesion molecule 1	E9QB01_MOUSE;O88682_MOUSE	1	10147.4	6802.77	11930.2	12528.6	9009.52	9983.53	9775.72	14519.5
E9QMH7	IKBKB interacting protein	Ikbip	E9QMH7	E9QMH7	Ikbip	IKBKB interacting protein	E9QMH7_MOUSE	1			9994.66	10732.3	9924.84	10581.8	6819.51	7751.74
E9QN31	NOP2 nucleolar protein	Nop2	E9QN31	E9QN31	Nop2	NOP2 nucleolar protein	E9QN31_MOUSE	1	5127.39	8375.32	9417.01	8651	10589.5	8794.23	11548.6	7672.01
F2Z3U3	Ras association (RalGDS/AF-6) and pleckstrin homology domains 1	Raph1	F2Z3U3;F2Z4B7;G5E867	F2Z3U3;F2Z4B7;G5E867;S4R2K5	Raph1	Ras association (RalGDS/AF-6) and pleckstrin homology domains 1	F2Z3U3_MOUSE;F2Z4B7_MOUSE;G5E867_MOUSE	6	5315.74	4338.54	4532.08	4439.48	5257.02	4088.02	3804.05	4837.29
F2Z461	E3 ISG15--protein ligase Herc6	Herc6	F2Z461	F2Z461;Q9CRZ4;Q9D9A3	Herc6	E3 ISG15--protein ligase Herc6	HERC6_MOUSE	2	3711.28		4722.97	3495.27	8992.47		3505.56	5435.26
F6QCI0	TATA-box binding protein associated factor 15 (Fragment)	Taf15	F6QCI0;Q3TLE4;Q8BQ46	F6QCI0;Q3TLE4;Q8BQ46	Taf15	TATA-box binding protein associated factor 15 (Fragment)	F6QCI0_MOUSE;Q3TLE4_MOUSE;Q8BQ46_MOUSE	3	56144.1	46643.7	51269.4	47563.6	47446.1	40980.7	48514	43049.3
F6QNN0	Coiled-coil domain containing 180	Ccdc180	F6QNN0;J3QNE4	F6QNN0;J3QNE4;Q8C6R9	Ccdc180	Coiled-coil domain containing 180	F6QNN0_MOUSE;J3QNE4_MOUSE	1			21151.6				14089.4
F6RDM4	glutaminase (Fragment)	Gls	F6RDM4	F6RDM4	Gls	glutaminase (Fragment)	F6RDM4_MOUSE	1				1186.24	1467.54	1175.22	2084.22	1338.33
F6SEU4	Ras/Rap GTPase-activating protein SynGAP	Syngap1	F6SEU4	F6SEU4;A0A0A6YVS6;A0A0J9YUM2;A0A0J9YVH8;A0A140T8K9;A0A2R8VH83;A0A2R8VHH2;A0A2S1B6B8;A0A2S1B6F9;A0A338P799;J3QQ18	Syngap1	Ras/Rap GTPase-activating protein SynGAP	SYGP1_MOUSE	2								2258.11
F6SRV1	Splicing factor 1 (Fragment)	Sf1	F6SRV1	D3YZC9;F6SRV1	Sf1	Splicing factor 1 (Fragment)	F6SRV1_MOUSE	2	4514.29	5685.73	4850.86	5099.69	6285.67	6577.9	5034.98	6010.96
F6T8X6	SEC16 homolog A, endoplasmic reticulum export factor (Fragment)	Sec16a	F6T8X6	F6T8X6	Sec16a	SEC16 homolog A, endoplasmic reticulum export factor (Fragment)	F6T8X6_MOUSE	1	2556.45	3102.66	2916.37	2190.89	4014.77	3983.94	2798.42	3216.97
F6U529	glutaminase (Fragment)	Gls	F6U529	F6U529	Gls	glutaminase (Fragment)	F6U529_MOUSE	1	5558.43	3225.83	4400.96	5447.41	6176.55	4156.53	5814.83	4966.68
F6U775	OPA1, mitochondrial dynamin like GTPase (Fragment)	Opa1	F6U775;Q8BK99	F6U775;Q8BK99	Opa1	OPA1, mitochondrial dynamin like GTPase (Fragment)	F6U775_MOUSE;Q8BK99_MOUSE	1	782.941	2851.47	2231.82	1532.98	1968.83	958.145	1750.06	2852.72
F6UT58	Importin 9 (Fragment)	Ipo9	F6UT58	F6UT58	Ipo9	Importin 9 (Fragment)	F6UT58_MOUSE	1	3361.82	2775.99	2322.88	4974.88	4886.51	3603.7	6789.91	5811.31
F6VQ81	Tumor protein D52-like 2 (Fragment)	Tpd52l2	F6VQ81;Q3TUJ9;Q8BKP1	F6VQ81;Q3TUJ9;Q8BKP1	Tpd52l2	Tumor protein D52-like 2 (Fragment)	F6VQ81_MOUSE;Q3TUJ9_MOUSE;Q8BKP1_MOUSE	1	2606.66	2583.48	2558.23	1799.91	4599.24	3545.56	6444.9	3180.34
F6VRP8	Lectin, galactoside-binding, soluble, 3 binding protein (Fragment)	Lgals3bp	F6VRP8	F6VRP8	Lgals3bp	Lectin, galactoside-binding, soluble, 3 binding protein (Fragment)	F6VRP8_MOUSE	1	11505.4	10442	16959.8	15255.2	60229.6	67036.2	41103.4	30398.2
F6VSK8	Integrin alpha 6 (Fragment)	Itga6	F6VSK8;Q8CC06	F6VSK8;Q8CC06;Q8BR82	Itga6	Integrin alpha 6 (Fragment)	F6VSK8_MOUSE;Q8CC06_MOUSE	2	6594.29	4957.1	4207.33	5746.27	6763.56			5261.38
F6WHQ7	glutathione transferase (Fragment)	Gstm1	F6WHQ7	F6WHQ7	Gstm1	glutathione transferase (Fragment)	F6WHQ7_MOUSE	2	18319.2	20302.1	19148.1	19003.8	17434.7	19237.6	16229.9	13296.8
F6WL90	Nuclear antigen Sp100 (Fragment)	Sp100	F6WL90	F6Q968;F6WL90	Sp100	Nuclear antigen Sp100 (Fragment)	F6WL90_MOUSE	5	8774.48	7904.65	12248.5	13068.5	16936.1	15851.7	11073.4	9909.99
F6XCT0	Microtubule-actin crosslinking factor 1 (Fragment)	Macf1	F6XCT0	A0A0A0MQA6;A0A571BF93;A0A571BGC6;B1ARU4;F6Q750;F6SHS0;F6XCT0;F7ACR9;Q5DTZ2	Macf1	Microtubule-actin crosslinking factor 1 (Fragment)	F6XCT0_MOUSE	2	9797.54	9063.14	9412.97	9241.48	10981.2	10835.2	8960.44	10011.9
F6ZBR8	Widely-interspaced zinc finger motifs	Wiz	F6ZBR8	F6ZBR8	Wiz	Widely-interspaced zinc finger motifs	F6ZBR8_MOUSE	2	3294.14	4566.85	2664.35	4445.31	3399.26	2069.65	3991.05	3111.01
F6ZDS4	Nucleoprotein TPR	Tpr	F6ZDS4	F6ZDS4;Q3V1L5;Q7M739;Q32P08;Q3TZB5	Tpr	Nucleoprotein TPR	TPR_MOUSE	96	60391.3	57510.2	55988.1	59484.1	58257.4	57235.4	60347.1	57405.6
F6ZGI7	Molybdopterin synthase sulfur carrier subunit	Mocs2	F6ZGI7	F6ZGI7	Mocs2	Molybdopterin synthase sulfur carrier subunit	F6ZGI7_MOUSE	1	17960.7	28847.8	25318.3	26643.9	22704.8	23284.1	22907.5	21437
F6ZQA3	Nuclear mitotic apparatus protein 1 (Fragment)	Numa1	F6ZQA3;Q3UNM2	F6ZQA3;Q3UNM2	Numa1	Nuclear mitotic apparatus protein 1 (Fragment)	F6ZQA3_MOUSE;Q3UNM2_MOUSE	1	13967.1	14888.3	16215.3	16125.4	14277.4	15093.3	15377.3	14977.8
F7AI87	Proteasome (prosome, macropain) 26S subunit, non-ATPase, 4 (Fragment)	Psmd4	F7AI87;Q3ULG4	Q3ULG4;F7AI87	Psmd4	Proteasome (prosome, macropain) 26S subunit, non-ATPase, 4 (Fragment)	F7AI87_MOUSE;Q3ULG4_MOUSE	1				2072.69	3537.85	1135.72	2760.41	3452.64
F7ASU3	Ras homolog family member T1 (Fragment)	Rhot1	F7ASU3	F7ASU3	Rhot1	Ras homolog family member T1 (Fragment)	F7ASU3_MOUSE	1	5126.99	5197.64	2306.35	4108.48	3375.06		3140.84	3648.96
F7BE84	Ankyrin repeat domain 50 (Fragment)	Ankrd50	F7BE84	F7BE84	Ankrd50	Ankyrin repeat domain 50 (Fragment)	F7BE84_MOUSE	3	4095.12	3904.86	4550.33	5376.33	4667.51	3738.26	3780.53	3520.22
F7BJB9	MORC family CW-type zinc finger protein 3	Morc3	F7BJB9	F7BJB9	Morc3	MORC family CW-type zinc finger protein 3	MORC3_MOUSE	6	8263.13	6311.98	7408.02	6669.72	7449.53	6548.8	6480.89	6504.48
F7BWT7	Tetraspanin-15	Tspan15	F7BWT7	F7BWT7	Tspan15	Tetraspanin-15	TSN15_MOUSE	2	7449.21	6868.52	6313.5	3444.77	6239.07	6683.35	7458.11	8471.24
F7CK55	Collagen, type IV, alpha 5 (Fragment)	Col4a5	F7CK55;Q63ZW6;Q8BNS7;Q9ESQ2	F7CK55;Q3TP61;Q63ZW6;Q80V57;Q8BNS7;Q9ESQ2;Q61436	Col4a5	Collagen, type IV, alpha 5 (Fragment)	F7CK55_MOUSE;Q63ZW6_MOUSE;Q8BNS7_MOUSE;Q9ESQ2_MOUSE	3	44584.5	55330.4	44269.1	33349.3	26573.2	27027.3	17952.9	15161.7
F8TZM2	Polyprotein (Fragment)		F8TZM2;F8TZM4;F8TZM6	F8TZM2;F8TZM4;F8TZM6		Polyprotein (Fragment)	F8TZM2_MOUSE;F8TZM4_MOUSE;F8TZM6_MOUSE	1	91911.7	67712.9	80088.4	35869	42628.2	37583.9	64744.9	54358.5
F8VPK0	Superkiller complex protein 3	Skic3	F8VPK0	F8VPK0;Q6ZQC8	Skic3	Superkiller complex protein 3	SKI3_MOUSE	27	11063.4	9185.84	9738.76	9995.49	9837.77	9842.52	9659.12	9171.61
F8VPN4	Glycogen debranching enzyme	Agl	F8VPN4	A0A0G2JGI9;F8VPN4;E0CYU6	Agl	Glycogen debranching enzyme	F8VPN4_MOUSE	43	26481.6	25464.8	27756.7	27753.7	30221.1	28328.8	26404.3	28787.9
F8VPP8	Zinc finger CCCH type containing 7B	Zc3h7b	F8VPP8	F8VPP8	Zc3h7b	Zinc finger CCCH type containing 7B	F8VPP8_MOUSE	5	6650.9	5506.46	7406.22	6039.77	6293.54	5900.11	4858.08	5450.44
F8VPU2	FERM, ARHGEF and pleckstrin domain-containing protein 1	Farp1	F8VPU2	F8VPU2;E9Q805	Farp1	FERM, ARHGEF and pleckstrin domain-containing protein 1	FARP1_MOUSE	18	17480.9	19958.5	18067.8	20948.7	12668.4	15316.6	13508.3	16699.2
F8VPX2	F-box and WD-40 domain protein 9	Fbxw9	F8VPX2;Q80XN6	F8VPX2;Q6PAS7;Q80XN6;Q8C4I7;Q9D1B0	Fbxw9	F-box and WD-40 domain protein 9	F8VPX2_MOUSE;Q80XN6_MOUSE	4	13100.3	13705.5	12559.9	12654.3	12814	14572.7	13816.1	12472.9
F8VPZ3	Ubiquitin carboxyl-terminal hydrolase 32	Usp32	F8VPZ3	F8VPZ3;G3UZF4	Usp32	Ubiquitin carboxyl-terminal hydrolase 32	UBP32_MOUSE	5	2682.21	2773.81	2818.98	2398.71	2708.15	3120.15	3023.03	2171.03
F8VPZ9	BRD4-interacting chromatin-remodeling complex-associated protein	Bicra	F8VPZ9	F8VPZ9;Q571B1	Bicra	BRD4-interacting chromatin-remodeling complex-associated protein	BICRA_MOUSE	2	4275.15	4382.12	3796.5	3402.01	4152.61	3384.16	4367.93	2976.84
F8VQ05	FRY like transcription coactivator	Fryl	F8VQ05	A0A0J9YUH4;F8VQ05	Fryl	FRY like transcription coactivator	F8VQ05_MOUSE	13	7382.2	6132.93	6958.58	7468.23	6558.44	6239.58	6244.95	6326.03
F8VQ07	Albumin superfamily member 1	Albfm1	F8VQ07	F8VQ07	Albfm1	Albumin superfamily member 1	F8VQ07_MOUSE	1		872.516		588.368	326.782	413.968	596.961
F8VQB6	Unconventional myosin-X	Myo10	F8VQB6	F8VQB6;E9Q5G1;Q80TR9	Myo10	Unconventional myosin-X	MYO10_MOUSE	10	7839.86	9098.85	8045.98	8744.99	11572.5	10209.8	9546.72	9342.86
F8VQC1	Signal recognition particle subunit SRP72	Srp72	F8VQC1	F8VQC1;E9Q740;Q3UZL8;A0JLN1;A0PJ97;Q3UU23	Srp72	Signal recognition particle subunit SRP72	F8VQC1_MOUSE	15	14677.3	14225.6	12667.3	17445.7	12548.1	9622.36	10490.9	10006.4
F8VQJ3	Laminin, gamma 1	Lamc1	F8VQJ3	F8VQJ3;Q3UNG0	Lamc1	Laminin, gamma 1	F8VQJ3_MOUSE	3	89136.9	83305.9	72834.9	75261.2	68146.9	63271.1	65768.4	63197.3
F8VQK3	guanylate cyclase	Gucy1a2	F8VQK3	F8VQK3;Q3TNN8	Gucy1a2	guanylate cyclase	F8VQK3_MOUSE	13	7066.85	7170.62	7600.4	8107.34	8771.52	7700.9	8135.87	8252
G3UVU2	Splicing factor 3a, subunit 2	Sf3a2	G3UVU2;Q7TN25	G3UVU2;Q7TN25	Sf3a2	Splicing factor 3a, subunit 2	G3UVU2_MOUSE;Q7TN25_MOUSE	2	12711.6	11793.5	15308.7	14148.4	8191.29	11675.6	15488	11160.7
G3UW36	Uncharacterized protein CFAP97D2	Cfap97d2	G3UW36	A0A286YE38;G3UW36	Cfap97d2	Uncharacterized protein CFAP97D2	C97D2_MOUSE	1		2385.74				2085.26		1535.57
G3UWD9	Solute carrier family 17 (sodium phosphate), member 3	Slc17a3	G3UWD9;Q5SZ93;Q8VCY5	Q5SZ93;G3UWD9;Q5SZ92;Q8VCY5	Slc17a3	Solute carrier family 17 (sodium phosphate), member 3	G3UWD9_MOUSE;Q5SZ93_MOUSE;Q8VCY5_MOUSE	3	17415.8	20107.5	31554.5	19088.5	12268.6	7108.61	12262.5	5268.95
G3UX26	Voltage-dependent anion-selective channel protein 2	Vdac2	G3UX26	G3UX26	Vdac2	Voltage-dependent anion-selective channel protein 2	G3UX26_MOUSE	1	69777.5	78251	71793.6	74045.5	82579.9	68098.3	81303.3	83376.3
G3UXJ8	Acyl-CoA thioesterase 8	Acot8	G3UXJ8	G3UXJ8	Acot8	Acyl-CoA thioesterase 8	G3UXJ8_MOUSE	1	12048.9	16472.4	19520.7	18239.4	34190.4	33690.2	38318.2	39494.1
G3UXX2	Dynamin 2 (Fragment)	Dnm2	G3UXX2;G3X9G4;Q3TBU6;Q3TCR7;Q9CUM4	G3X9G4;Q3TBU6;Q3TCR7;G3UXX2;Q91Z39;Q9CUM4	Dnm2	Dynamin 2 (Fragment)	G3UXX2_MOUSE;G3X9G4_MOUSE;Q3TBU6_MOUSE;Q3TCR7_MOUSE;Q9CUM4_MOUSE	1	23672.6	22908.3	23950.7	20828.2	23854.2	23923	23625.5	23547.8
G3UY52	Ubiquitin specific peptidase 9, X chromosome (Fragment)	Usp9x	G3UY52	G3UY52	Usp9x	Ubiquitin specific peptidase 9, X chromosome (Fragment)	G3UY52_MOUSE	1	7552.02	6254.6	7700.95	6961.41	5730.95	7410.51	5554.03	8404.42
G3UZ63	Kelch domain containing 4	Klhdc4	G3UZ63;G3UZG5;G3X961;Q6PE06	G3UZ63;G3UZG5;G3X961;Q6PE06	Klhdc4	Kelch domain containing 4	G3UZ63_MOUSE;G3UZG5_MOUSE;G3X961_MOUSE;Q6PE06_MOUSE	1	3747.62	2977.11	2588.95	2039.21	2305.86	2459.49	2333.96	4564.85
G3UZR1	Tubulin, beta 5 class I (Fragment)	Tubb5	G3UZR1	G3UZR1	Tubb5	Tubulin, beta 5 class I (Fragment)	G3UZR1_MOUSE	1	2661.52	2728.14	3674.09	2084.91	3743.07	3068.25	4026.16	3173.83
G3X8Q5	ferroxidase	Cp	G3X8Q5;G3X9T8	G3X8Q5;G3X9T8	Cp	ferroxidase	G3X8Q5_MOUSE;G3X9T8_MOUSE	1	4199.71		6380.66	4274.78	2600.64	2124.43	3095.47	2639.44
G3X8T9	Serine (or cysteine) peptidase inhibitor, clade A, member 3N	Serpina3n	G3X8T9	Q80X76;G3X8T9;Q3UDB3;Q3UE77;Q3UTZ5	Serpina3n	Serine (or cysteine) peptidase inhibitor, clade A, member 3N	G3X8T9_MOUSE	4	9747.04	6258.36	6797.66	9280.29	24462.5	23102.3	19076.1	18536.2
G3X8U3	Queuosine 5'-phosphate N-glycosylase/hydrolase	QNG1	G3X8U3	G3X8U3;Q9D7X2	QNG1	Queuosine 5'-phosphate N-glycosylase/hydrolase	QNG1_MOUSE	19	82200.5	80707.5	81244.9	77509.9	80606.6	90029.3	92544.4	89071.3
G3X8X0	RNA helicase	Dhx16	G3X8X0;Q921Y1	G3X8X0;Q80TX4;Q921Y1;Q05BH3	Dhx16	RNA helicase	G3X8X0_MOUSE;Q921Y1_MOUSE	9	7106.08	6951.07	7602.87	8667.3	7792.16	7657.6	8339.25	8006.54
G3X922	DnaJ heat shock protein family (Hsp40) member C13	Dnajc13	G3X922	D4AFX7;G3X922;Q3TNE7;Q8BNL1	Dnajc13	DnaJ heat shock protein family (Hsp40) member C13	G3X922_MOUSE	90	55331.7	61344	63577.4	58823.8	61565.5	59702.3	59435.4	57690
G3X924	Plasmalemma vesicle associated protein	Plvap	G3X924	G3X924	Plvap	Plasmalemma vesicle associated protein	G3X924_MOUSE	2	10826	15750.4	11653.2	12396	8401.21	12296.6	14625.1	14406.5
G3X939	Sodium/hydrogen exchanger 3	Slc9a3	G3X939	G3X939;A0A286YD40;Q9WUJ5	Slc9a3	Sodium/hydrogen exchanger 3	SL9A3_MOUSE	4	11214.5	9437.35	10798.4	10506.5	6590.48	8117.42	7437.53	7020.06
G3X987	GTPase IMAP family member 9	Gimap9	G3X987	G3X987	Gimap9	GTPase IMAP family member 9	GIMA9_MOUSE	1		6077.52	2776.46	4643.98	4800.96	4091.83	3900.54	2550.55
G3X9B1	HEAT repeat-containing protein 1	Heatr1	G3X9B1	G3X9B1;Q3TMK0;Q3TNE1;Q3UNW7	Heatr1	HEAT repeat-containing protein 1	G3X9B1_MOUSE	15	19618	17150.6	19497.9	20767.9	20443.5	18924.4	17307.5	18663.1
G3X9C2	F-box only protein 50	Nccrp1	G3X9C2	G3X9C2;A0A0A0MQ97	Nccrp1	F-box only protein 50	FBX50_MOUSE	7	4979.93	27764.4	6162.93	5123.25	5835.76	4646.98	4919.67	7858.94
G3X9D6	Apolipoprotein N	Apon	G3X9D6;Q8BUM4	G3X9D6;Q8BUM4	Apon	Apolipoprotein N	G3X9D6_MOUSE;Q8BUM4_MOUSE	5	9852.33	7849.1	10576.5	10593.1	7013.08	7158.54	8420.83	8818.71
G3X9F6	SH3 domain and tetratricopeptide repeats 1	Sh3tc1	G3X9F6;Q3TXV8;Q3UDI4	F6U4F1;G3X9F6;Q3TBH5;Q3TD36;Q3TXV8;Q3UDI4;Q6KAR4;Q8R1A5	Sh3tc1	SH3 domain and tetratricopeptide repeats 1	G3X9F6_MOUSE;Q3TXV8_MOUSE;Q3UDI4_MOUSE	13	11887.2	14659.2	12547	12294	11985.9	10594.1	11038.2	12295.2
G3X9G9	Thiol methyltransferase 1A3	Tmt1a2	G3X9G9;Q5I0W6	Q5I0W6;G3X9G9	Tmt1a2;Tmt1a3	Thiol methyltransferase 1A3	G3X9G9_MOUSE;Q5I0W6_MOUSE	3	9059.35	13747.8	8793.45	7952.77	6106.07	7249.67	9616.59	9613.13
G3X9J0	Signal-induced proliferation-associated 1-like protein 3	Sipa1l3	G3X9J0	G3X9J0	Sipa1l3	Signal-induced proliferation-associated 1-like protein 3	SI1L3_MOUSE	4	5157.9	4546.8	4607.67	3486.81	4163.38	4369.04	4698.43	4446.81
G3X9K3	Brefeldin A-inhibited guanine nucleotide-exchange protein 1	Arfgef1	G3X9K3	G3X9K3	Arfgef1	Brefeldin A-inhibited guanine nucleotide-exchange protein 1	BIG1_MOUSE	39	28500.1	25942.9	27036.2	27516.9	27913.9	25570.1	26059	26689.7
G3X9X1	Kelch repeat and BTB domain-containing protein 2	Kbtbd2	G3X9X1	G3X9X1;Q6ZPP6;Q8R1W9	Kbtbd2	Kelch repeat and BTB domain-containing protein 2	KBTB2_MOUSE	3	8186.23	7934.4	8467.92	7550.9	8063.66	9413.61	9843.82	9130.97
G3X9Y5	Ubiquitin conjugation factor E4	Ube4a	G3X9Y5;I6L960	G3X9Y5;I6L960	Ube4a	Ubiquitin conjugation factor E4	G3X9Y5_MOUSE;I6L960_MOUSE	2	5280.8	5824.88	5106.54	4897.42	4944.74	3484.52	4888.39	3968.74
G3X9Y6	Aldo-keto reductase family 1, member C19	Akr1c19	G3X9Y6;Q5I0T6	A0A1Y7VK17;G3X9Y6;Q5I0T6	Akr1c19	Aldo-keto reductase family 1, member C19	G3X9Y6_MOUSE;Q5I0T6_MOUSE	11	28498.9	44873	34939.9	28758.6	30581.6	36183.5	31030.4	37402
G3X9Z4	Pre-mRNA cleavage complex 2 protein Pcf11	Pcf11	G3X9Z4	G3X9Z4	Pcf11	Pre-mRNA cleavage complex 2 protein Pcf11	PCF11_MOUSE	2	1598.84	1789.94	1545.23	1878.92	2237.75	1537.89	1757.24	2007.86
G3XA57	Rab11 family-interacting protein 2	Rab11fip2	G3XA57	G3XA57;Q3U366	Rab11fip2	Rab11 family-interacting protein 2	RFIP2_MOUSE	1	2079.78	1878.23	1648.52	1728.72	2119.27	2211.82	1284.86	1951.64
G3XA59	Transforming growth factor beta activator LRRC32	Lrrc32	G3XA59	G3XA59	Lrrc32	Transforming growth factor beta activator LRRC32	LRC32_MOUSE	1	1892	1684.58	2910.42	2862.77	2427.57	3494.02	2829.13	2947.32
G4V4Z2	Gag protein	gag	G4V4Z2	A0A068ETZ5;A0A240FAT1;A0A7S8ZXC7;G4V4Z1;P70355;Q1KYL9;Q1KYM2;Q8BFR9;Q8C1W7;A0A068EWW2;A0A068F126;A0A140DKP8;A0A7S8ZXA0;G4V4Z2;Q1KYL8;Q1KYM1;Q60588;Q6YIY0	gag	Gag protein	G4V4Z2_MOUSE	9	149532	119110	153762	85108.3	62878.8	63719.9	110438	85786.7
G5E829	Plasma membrane calcium-transporting ATPase 1	Atp2b1	G5E829	G5E829;Q6Q477;F7AAP4;D1FNM8;D1FNM9;E9Q828;H2BL43;A0A1W2P7C7;Q05CJ5;Q3TC38;Q3TDJ2;Q3UPA8	Atp2b1	Plasma membrane calcium-transporting ATPase 1	AT2B1_MOUSE	35	51560	49738.3	52979.4	50269.8	47186.8	48394.2	51380.3	52313.9
G5E870	E3 ubiquitin-protein ligase TRIP12	Trip12	G5E870	G5E870;A0A087WNZ7;A0A087WRV6	Trip12	E3 ubiquitin-protein ligase TRIP12	TRIPC_MOUSE	35	22939.4	18497.5	20774.3	20966.4	23082.7	21039.9	22176.7	20477.7
G5E872	Aminopeptidase RNPEPL1	Rnpepl1	G5E872	G5E872;J3QJW7	Rnpepl1	Aminopeptidase RNPEPL1	RNPL1_MOUSE	1	2987.12	3387.03	3470.5	2784.68	3139.78	2127.2	2696.34	3760.98
G5E895	Aldo-keto reductase family 1, member B10	Akr1b10	G5E895;Q8BIV6	G5E895;Q8BIV6;D3Z494	Akr1b10	Aldo-keto reductase family 1, member B10	G5E895_MOUSE;Q8BIV6_MOUSE	5	39665.9	36629.6	38454.6	35885.5	36069	40623	42463.9	43311.9
G5E897	Protein O-glucosyltransferase 3	Poglut3	G5E897	G5E897	Poglut3	Protein O-glucosyltransferase 3	PLGT3_MOUSE	16	26757.2	20652.4	25707.4	31739.2	27665.4	29400.5	27672.6	25150.3
G5E898	Periplakin	Ppl	G5E898;Q6PG96	G5E898;Q6PG96	Ppl	Periplakin	G5E898_MOUSE;Q6PG96_MOUSE	1	1836.95		1054.47	1316.86	2058	2036.52	1895.43	1790.28
G5E8K5	Ankyrin-3	Ank3	G5E8K5	G5E8K5;A0A1W2P812;G5E8K2;G5E8K3;S4R236;G3X971;Q9QXH1;S4R278;S4R2F5	Ank3	Ankyrin-3	ANK3_MOUSE	49	63806.8	73536.3	66079.2	69398.9	61607.5	57698.6	60651.1	68603.6
G5E8P1	Bromodomain-containing protein 1	Brd1	G5E8P1	G5E8P1;Q3UE68	Brd1	Bromodomain-containing protein 1	BRD1_MOUSE	4	6979.07	7481.63	8961.58	6973.97	8493.52	8345.1	8000.67	6939.87
G5E8Q8	Adhesion G protein-coupled receptor F5	Adgrf5	G5E8Q8	G5E8Q8;A0A286YDT5	Adgrf5	Adhesion G protein-coupled receptor F5	AGRF5_MOUSE	6	10528.1	11420.6	11971.7	9567.5	12398.3	13193.6	15440.6	13763.3
G5E8R1	Tropomyosin 1, alpha	Tpm1	G5E8R1	E9Q453;E9Q455;E9Q456;G5E8R0;G5E8R2;G5E8R1;S4R261	Tpm1	Tropomyosin 1, alpha	G5E8R1_MOUSE	3	141135	144286	139736	141754	151297	147888	142883	145152
G5E8S8	MAGUK p55 subfamily member 7	Mpp7	G5E8S8	G5E8S8	Mpp7	MAGUK p55 subfamily member 7	G5E8S8_MOUSE	1	3370.02	2621.28	4827.65	3760.79	3175.81	2170.11	2012.12	2600.38
G5E8T3	Signal recognition particle 19 kDa protein	Srp19	G5E8T3;Q9D104	G5E8T3;Q8BZ07;Q9D104	Srp19	Signal recognition particle 19 kDa protein	G5E8T3_MOUSE;Q9D104_MOUSE	2	13248.8	10416	13059.1	12704.1	15326.8	12620.5	13822	11749.1
G5E8V9	Arfaptin-1	Arfip1	G5E8V9	G5E8V9;E9QAY5;Q3TVE1	Arfip1	Arfaptin-1	ARFP1_MOUSE	9	21409.4	21347.8	21565.7	21707.1	23727.3	22091	23696.7	22457.9
G5E924	Heterogeneous nuclear ribonucleoprotein L (Fragment)	Hnrnpl	G5E924;Q3UMT7	G5E924;Q3UMT7	Hnrnpl	Heterogeneous nuclear ribonucleoprotein L (Fragment)	G5E924_MOUSE;Q3UMT7_MOUSE	3	10054	10975.1	8491.04	7536.7	10887.3	12806.8	10801.8	11092
H3BJ38	Phosphodiesterase 4D interacting protein (myomegalin)	Pde4dip	H3BJ38	H3BJ38	Pde4dip	Phosphodiesterase 4D interacting protein (myomegalin)	H3BJ38_MOUSE	1		3112.25	4520.42	5133.03		2281.28
H3BJ67	Ecotropic viral integration site 5 like	Evi5l	H3BJ67;H3BKQ3;H3BL92;Q3U1G0	H3BKQ3;H3BJ67;H3BL92;Q3U1G0	Evi5l	Ecotropic viral integration site 5 like	H3BJ67_MOUSE;H3BKQ3_MOUSE;H3BL92_MOUSE;Q3U1G0_MOUSE	2	3108.11	3072.27	3036.14	3647.07	2130.9	2344.95	2881.26	2801.77
H3BJD6	Protein phosphatase 1, regulatory subunit 9A	Ppp1r9a	H3BJD6;H3BL28;Q3UUK5;Q7TN74	H3BJD0;H3BJD6;H3BKQ7;H3BL28;Q3UUK5;Q7TN74;Q7TSA7;Q80TH3;Q80ZL7	Ppp1r9a	Protein phosphatase 1, regulatory subunit 9A	H3BJD6_MOUSE;H3BL28_MOUSE;Q3UUK5_MOUSE;Q7TN74_MOUSE	2	3593.05	5591.79	3677.26	2943.37	5992.52	4096.93	4610.14	4961.61
H3BKC5	LSM5 homolog, U6 small nuclear RNA and mRNA degradation associated (Fragment)	Lsm5	H3BKC5	H3BKC5	Lsm5	LSM5 homolog, U6 small nuclear RNA and mRNA degradation associated (Fragment)	H3BKC5_MOUSE	1		3664.6	1979.03	2084.75	17332.8	14478.2	19051.4	21450.9
I6L985	Igh protein	Igh	I6L985	A0A075B5P4;A0A0A6YWR2;A0A0B6VMB2;A0A0C6E3V3;A0A0M4KM70;A0A4U9FFL2;I6L985;U5LP42	Igh	Igh protein	I6L985_MOUSE	6	14569.5	15935.9	13227.2	10946.6	10401.7	13371.9	21719.6	14594.2
J3QK52	NOC2 like nucleolar associated transcriptional repressor	Noc2l	J3QK52;Q3UZI6;Q8BHX6	J3QK52;Q3UZI6;Q8BHX6	Noc2l	NOC2 like nucleolar associated transcriptional repressor	J3QK52_MOUSE;Q3UZI6_MOUSE;Q8BHX6_MOUSE	1	4138.74	4583.96	4523.5	2889.88	4532.63	5477.42	2124.87	5824.66
J3QN89	Angio-associated migratory protein	Aamp	J3QN89;Q3TJ22;Q3U9F0;Q8K2C1	J3QN89;A0A087WNM5;Q3TJ22;Q3U9F0;Q3UJF9;Q8K2C1	Aamp	Angio-associated migratory protein	J3QN89_MOUSE;Q3TJ22_MOUSE;Q3U9F0_MOUSE;Q8K2C1_MOUSE	6	28679.9	31674.1	27180.3	29728.5	26779.9	28935.1	28322.4	25579.4
J3QPC5	Zinc finger protein 850	Zfp850	J3QPC5	J3QPC5	Zfp850	Zinc finger protein 850	J3QPC5_MOUSE	1	16762.2	55250.4	46055.7	59953.6	21621	34006.1	30110.8	99800.9
J9JI90	TRIO and F-actin binding protein (Fragment)	Triobp	J9JI90	J9JI90	Triobp	TRIO and F-actin binding protein (Fragment)	J9JI90_MOUSE	1	5048.94	4519.69	5152.8	3959.57
K0BWC3	Palladin isoform	Palld	K0BWC3	K0BWC3	Palld	Palladin isoform	K0BWC3_MOUSE	1	3890.66	3848.43	2927.36	1753.82	6389.38	7261.64	5598.87	6325.66
L0N7N1	Kinesin-like protein KIF14	Kif14	L0N7N1	L0N7N1;B2RY84	Kif14	Kinesin-like protein KIF14	KIF14_MOUSE	1				1951.22			2677.24	2496.76
L7MUC7	Major urinary protein 7 (Fragment)	Mup7	L7MUC7	L7MUC7	Mup7	Major urinary protein 7 (Fragment)	L7MUC7_MOUSE	4	133501	49365.3	86949.2	166870	242411	78723.7	54463.9	68961
L7N451	GTPase, very large interferon inducible 1	Gvin1	L7N451	L7N451;Q3TBC0;Q3U0G9	Gvin1	GTPase, very large interferon inducible 1	L7N451_MOUSE	1	4610	5393.66	6428.33	5402.46	11862.9	6690.47	6521.88	4229.83
L7N466	5-formyltetrahydrofolate cyclo-ligase	Mthfs	L7N466;Q3TYX5;Q8R1G5	L7N466;Q3TYX5;Q8R1G5	Mthfs;Mthfsl	5-formyltetrahydrofolate cyclo-ligase	L7N466_MOUSE;Q3TYX5_MOUSE;Q8R1G5_MOUSE	1	3956.24	4349.45	3658.64	2500.04	2520.57	3961.61	3827.99	3249.69
M0QWE9	Achaete-scute family bHLH transcription factor 4 (Fragment)	Ascl4	M0QWE9	M0QWE9	Ascl4	Achaete-scute family bHLH transcription factor 4 (Fragment)	M0QWE9_MOUSE	1	7445.22	9586.24	7243.75	12157.7	9796.57	12123.3	8517.35	14708.7
M0QWP1	Agrin	Agrn	M0QWP1;Q5EBX5	M0QWP1;Q5EBX5;O08860;Q91XS3	Agrn	Agrin	M0QWP1_MOUSE;Q5EBX5_MOUSE	10	26443.8	34791.1	31112	29939.6	27789	25195.3	25694.8	27550.4
N0E634	Casein kinase II subunit beta (Fragment)	Csnk2b	N0E634	N0E634	Csnk2b	Casein kinase II subunit beta (Fragment)	N0E634_MOUSE	1			7296.15		8651.49		9564.84	8941.29
O08528	Hexokinase-2	Hk2	O08528	O08528;Q91W97;E9Q5B5	Hk2	Hexokinase-2	HXK2_MOUSE	31	30464.6	24047.5	26756.3	30763.6	29646	29478.7	28294.2	30321.6
O08529	Calpain-2 catalytic subunit	Capn2	O08529	O08529;Q3U3A8;Q3U8S5;Q8BPV9	Capn2	Calpain-2 catalytic subunit	CAN2_MOUSE	40	66456.5	60655.4	62886.8	66323.6	69307.3	72165	65753.7	68082.1
O08530	Sphingosine 1-phosphate receptor 1	S1pr1	O08530	O08530;K7XUH1;Q3UUK3	S1pr1	Sphingosine 1-phosphate receptor 1	S1PR1_MOUSE	1	2148.47	1990.94	1602.7	2756.36	3317.69	2568.11	2131.86	2985.26
O08532	Voltage-dependent calcium channel subunit alpha-2/delta-1	Cacna2d1	O08532	O08532;A0A411ACY8;Q14BH8	Cacna2d1	Voltage-dependent calcium channel subunit alpha-2/delta-1	CA2D1_MOUSE	30	32477.4	32063.5	31969.7	35579	32522.9	32377	35259.4	34631.3
O08539	Myc box-dependent-interacting protein 1	Bin1	O08539	O08539;A0A3Q4EBK4;A0AAQ4VMS1;Q6P1B9	Bin1	Myc box-dependent-interacting protein 1	BIN1_MOUSE	9	34279.3	33023.5	34837.6	31928.2	33415.7	34718.9	35733.3	34149.7
O08543	Ephrin-A5	Efna5	O08543	O08543	Efna5	Ephrin-A5	EFNA5_MOUSE	2		796.304	560.63	631.406	279.185			521.504
O08547	Vesicle-trafficking protein SEC22b	Sec22b	O08547	O08547;A0A0G2JF08;E9Q6R3;Q3UZ06;D6RES2	Sec22b	Vesicle-trafficking protein SEC22b	SC22B_MOUSE	10	20222.7	17317.1	15086.4	20605.2	19241.6	15347.4	18396.7	16535.7
O08550	Histone-lysine N-methyltransferase 2B	Kmt2b	O08550	O08550;F8WJ40;F6W623;Q6PHU4;Q8CHH1;Q6P6H8;Q9CT28	Kmt2b	Histone-lysine N-methyltransferase 2B	KMT2B_MOUSE	2	4978.76	7043.11	4081.85	7118.47	6417.68	4255.44	4395.47	5042.82
O08553	Dihydropyrimidinase-related protein 2	Dpysl2	O08553	O08553;A0AAQ4VMY7	Dpysl2	Dihydropyrimidinase-related protein 2	DPYL2_MOUSE	30	596230	543117	557224	608680	605129	644874	644831	669499
O08573	Galectin-9	Lgals9	O08573	O08573;B1AQR8;G3X9T7	Lgals9	Galectin-9	LEG9_MOUSE	12	74012.6	69291.8	75304.1	81498.7	96829.6	85138	70523.9	66246.6
O08579	Emerin	Emd	O08579	O08579;A2AM95;B7FAU5;Q3THM8	Emd	Emerin	EMD_MOUSE	9	38998.6	32260.9	36338.1	33833.3	36596.3	35924.7	37303.8	38109
O08580	Steroid hormone receptor ERR1	Esrra	O08580	O08580;A0A668KLU7;G3UY24	Esrra	Steroid hormone receptor ERR1	ERR1_MOUSE	1	2917.05				3026.44	1748.19	1908.88	3226.44
O08582	GTP-binding protein 1	Gtpbp1	O08582	O08582;A0A2R8VHC2;A0A2R8W725	Gtpbp1	GTP-binding protein 1	GTPB1_MOUSE	13	18166.9	18175.4	19108.8	19048.6	17798.3	16276.1	18414.5	17489.9
O08583	THO complex subunit 4	Alyref	O08583	O08583;Q9JJW6;D9J342;G3X9I4;Q4KL64	Alyref	THO complex subunit 4	THOC4_MOUSE	7	165715	189907	194229	150604	198065	223926	274157	261130
O08585	Clathrin light chain A	Clta	O08585	O08585;B1AWD9;B1AWD8;B1AWE0;B1AWE1;Q3THU7;Q6PFA2	Clta	Clathrin light chain A	CLCA_MOUSE	9	231607	232111	235807	259881	298887	284926	257063	292218
O08586	Phosphatidylinositol 3,4,5-trisphosphate 3-phosphatase and dual-specificity protein phosphatase PTEN	Pten	O08586	A0A6G6A824;A0A6G7SEK5;A0A6G7SF19;O08586;A0A024QYR9;A0A1V0DNR6	Pten	Phosphatidylinositol 3,4,5-trisphosphate 3-phosphatase and dual-specificity protein phosphatase PTEN	PTEN_MOUSE	3	6747.38	4775.46	4983.25	6780.37	6233.3	4409.99	5329.63	5672.19
O08599	Syntaxin-binding protein 1	Stxbp1	O08599	O08599	Stxbp1	Syntaxin-binding protein 1	STXB1_MOUSE	15	19119.8	19194.9	18798.3	21434.9	21341.1	18978.8	19207.8	29427.8
O08600	Endonuclease G, mitochondrial	Endog	O08600	O08600;Q3UN47	Endog	Endonuclease G, mitochondrial	NUCG_MOUSE	10	18205.5	23879.7	21326.8	20776.3	22161.6	21694.7	23581.2	22105.7
O08601	Microsomal triglyceride transfer protein large subunit	Mttp	O08601	O08601	Mttp	Microsomal triglyceride transfer protein large subunit	MTP_MOUSE	15	14028.2	19313.4	17267	13045.5	9850.8	11086.9	9135.59	10996.4
O08605	MAP kinase-interacting serine/threonine-protein kinase 1	Mknk1	O08605	O08605;A2A8W8;Q3U1I8;F6VT22;Q3TDV2;Q3V457	Mknk1	MAP kinase-interacting serine/threonine-protein kinase 1	MKNK1_MOUSE	3	4788.22	3115.23	3730.98	4539.86	4888.36	4310.01	3236.85	3275.47
O08609	Max-like protein X	Mlx	O08609	O08609;A2BFB0;A2BFB1;A2BFB2;Q3UQB4;Q8K0H8	Mlx	Max-like protein X	MLX_MOUSE	4	5468.69	5252.35	3950.51	5544.14	5963.6	5012.43	4911.55	5155.61
O08638	Myosin-11	Myh11	O08638	O08638;A0A338P6K2;A0A2R8VHF9;E9QPE7;Q69ZX3	Myh11	Myosin-11	MYH11_MOUSE	100	43047.6	51590.5	40236.6	48229.5	43197.1	50476.4	42150.5	45328.5
O08644	Ephrin type-B receptor 6	Ephb6	O08644	O08644;A2JY28	Ephb6	Ephrin type-B receptor 6	EPHB6_MOUSE	1	563171	821598	647234	533080	534963	547047	548711	595108
O08648	Mitogen-activated protein kinase kinase kinase 4	Map3k4	O08648	O08648;Q80U64;Q8K4X6	Map3k4	Mitogen-activated protein kinase kinase kinase 4	M3K4_MOUSE	10	12327.8	10172.8	10382.7	10431.7	12278.4	11854.7	12472.7	10950
O08663	Methionine aminopeptidase 2	Metap2	O08663	O08663;Q3TMN1;Q3UI33;Q58E65;M0QW69	Metap2	Methionine aminopeptidase 2	MAP2_MOUSE	23	102915	103082	108208	107570	109793	109993	108675	101866
O08677	Kininogen-1	Kng1	O08677	O08677;A0A0R4J038;D3YTY9	Kng1	Kininogen-1	KNG1_MOUSE	24	248676	202117	244958	292702	177979	174194	163408	206906
O08688	Calpain-5	Capn5	O08688	O08688;Q3TDS7;Q3TPL4;Q3U2P3;Q3UTF3	Capn5	Calpain-5	CAN5_MOUSE	12	18235.1	18522.7	17022	16634.8	15889.7	18898.1	17927.9	18842.7
O08691	Arginase-2, mitochondrial	Arg2	O08691	O08691;Q8R1Q7	Arg2	Arginase-2, mitochondrial	ARGI2_MOUSE	16	156698	100205	104865	109063	186648	201263	182842	173564
O08692	Neutrophilic granule protein	Ngp	O08692	O08692	Ngp	Neutrophilic granule protein	NGP_MOUSE	14	280061	191663	268076	303917	170801	207473	180441	346875
O08709	Peroxiredoxin-6	Prdx6	O08709	O08709;Q53ZU7;Q6A0D0;D3Z0Y2;Q6GT24;Q8BPD3	Prdx6	Peroxiredoxin-6	PRDX6_MOUSE	27	725743	761201	722200	676305	727274	758161	744277	690173
O08715	A-kinase anchor protein 1, mitochondrial	Akap1	O08715	O08715	Akap1	A-kinase anchor protein 1, mitochondrial	AKAP1_MOUSE	6	15197.2	12065.6	13020.5	15176.7	21983.4	17724.4	16842.6	19309.1
O08734	Bcl-2 homologous antagonist/killer	Bak1	O08734	O08734	Bak1	Bcl-2 homologous antagonist/killer	BAK_MOUSE	5	29666.8	30343.6	32844.7	35937.2	37778.7	36269.8	48605.2	46772
O08736	Caspase-12	Casp12	O08736	O08736;E9Q575;Q6B836;Q8BSX6;Q6B837	Casp12	Caspase-12	CASPC_MOUSE	1	2685.28		5029.24	2934.04	3309.05	3167.67	3795.44
O08738	Caspase-6	Casp6	O08738	O08738;Q3TPJ9;Q99M47;Q9D089	Casp6	Caspase-6	CASP6_MOUSE	14	22134.3	21168.3	20716.3	19562.9	23645.2	23653.1	23068.6	22379.1
O08739	AMP deaminase 3	Ampd3	O08739	O08739;A0A1L1SRX2;Q922J7	Ampd3	AMP deaminase 3	AMPD3_MOUSE	24	20126.1	17573.9	18812.5	20801.4	24450.5	24263.2	24191.3	26165.2
O08740	DNA-directed RNA polymerase II subunit RPB11	Polr2j	O08740	O08740;Q3TYI2;D3YZ20;Q6PI63	Polr2j	DNA-directed RNA polymerase II subunit RPB11	RPB11_MOUSE	4	32795.9	30828.5	30019.2	24671.3	29087.9	31033.3	26096.7	20908
O08746	Matrilin-2	Matn2	O08746	O08746;A0A2I3BRF3;Q3TQ80;Q569V0;Q8C435;Q99K64	Matn2	Matrilin-2	MATN2_MOUSE	14	17553.4	14723.9	15511.5	17635.9	20082.4	20056.8	18406.2	19197.9
O08749	Dihydrolipoyl dehydrogenase, mitochondrial	Dld	O08749	O08749;Q3TIE8	Dld	Dihydrolipoyl dehydrogenase, mitochondrial	DLDH_MOUSE	28	242338	360656	307052	302789	249443	236872	257473	279680
O08756	3-hydroxyacyl-CoA dehydrogenase type-2	Hsd17b10	O08756	O08756;A2AFQ2;Q99N15;Q9CYT3	Hsd17b10	3-hydroxyacyl-CoA dehydrogenase type-2	HCD2_MOUSE	10	126346	173894	152562	146385	125400	144942	132081	126979
O08759	Ubiquitin-protein ligase E3A	Ube3a	O08759	O08759;Q5DTH1;A0A0J9YUK0	Ube3a	Ubiquitin-protein ligase E3A	UBE3A_MOUSE	20	18802.6	17682.4	18103.9	19543.7	18785	18178.6	16263.7	16930
O08760	N-glycosylase/DNA lyase	Ogg1	O08760	O08760;Q3UIL3	Ogg1	N-glycosylase/DNA lyase	OGG1_MOUSE	3	8450.31	10067	9107.64	8111.84	7771.99	6069.31	7863.8	8092.88
O08784	Treacle protein	Tcof1	O08784	O08784;H3BL37;F6R3V4;H3BIX0;H3BK88;Q05BH6;Q6PFZ6;Q7TPZ2	Tcof1	Treacle protein	TCOF_MOUSE	4	26571.9	19356.1	23507.9	21033.2	28954.6	28496.9	26549.5	26675.4
O08785	Circadian locomoter output cycles protein kaput	Clock	O08785	O08785;P97460;A0A0J9YU61;Q6ZQD6;G3X9B7;Q32ME6	Clock	Circadian locomoter output cycles protein kaput	CLOCK_MOUSE	2	3482.98	4370.89	4380.98	3972.59	3076.2	3043.54	3397.83	3881.95
O08788	Dynactin subunit 1	Dctn1	O08788	O08788;E9Q3M3;E9Q586;Q3T9V8;Q3TB96;Q6NZM3;D3YX34	Dctn1	Dynactin subunit 1	DCTN1_MOUSE	52	88162.6	80626.6	83928.3	84926.9	90951.8	91205	94811.6	94560.6
O08795	Glucosidase 2 subunit beta	Prkcsh	O08795	O08795;Q3TWG2;Q3U518	Prkcsh	Glucosidase 2 subunit beta	GLU2B_MOUSE	16	72633	56030.5	71215.8	77962	74324.7	68346.7	64069.4	65912.8
O08796	Eukaryotic elongation factor 2 kinase	Eef2k	O08796	O08796;Q3UWZ1;Q7TPC7;Q8BNP6;Q8CEC8;F6ZEU2;F7A9F2	Eef2k	Eukaryotic elongation factor 2 kinase	EF2K_MOUSE	1	4579.31	3050.27	5604.56	3733.97	3980.53	3948.82	2325.45	3900.12
O08797	SPI6	Serpinb9	O08797	O08797	Serpinb9	SPI6	O08797_MOUSE	27	76146	71456.8	79903.7	75741.2	89990.3	89214.1	98018.9	91977
O08800	Serpin B8	Serpinb8	O08800	O08800;O08799;Q3UFM1	Serpinb8	Serpin B8	SPB8_MOUSE	10	31940.4	28480.5	30926	31891.5	42067.6	43057.7	48657.4	45980.4
O08804	NK13	Serpinb6b	O08804	O08804;A0A1Y7VLD5;Q3TAM4	Serpinb6b	NK13	O08804_MOUSE	22	43255.5	33939.9	41712.6	39781.9	45222.1	52607	44172.5	35030.6
O08807	Peroxiredoxin-4	Prdx4	O08807	O08807;Q9D634	Prdx4	Peroxiredoxin-4	PRDX4_MOUSE	9	893580	755278	871207	965358	1057840	1046740	928596	900298
O08808	Protein diaphanous homolog 1	Diaph1	O08808	O08808;E9PV41;F6XC54;Q5DTQ4;Q3U104	Diaph1	Protein diaphanous homolog 1	DIAP1_MOUSE	34	36119	30164.4	30808.1	35652.7	39736.4	35480.7	35644.1	35616.5
O08810	116 kDa U5 small nuclear ribonucleoprotein component	Eftud2	O08810	O08810;A2AH85;G3UZ34;Q3TMY8;Q3U5Q3;Q543F1;Q6A0E3;Q7TMX4	Eftud2	116 kDa U5 small nuclear ribonucleoprotein component	U5S1_MOUSE	43	64098.7	69017.6	67422.5	67056.8	69452.8	76878.1	76274.4	78379.1
O08811	General transcription and DNA repair factor IIH helicase subunit XPD	Ercc2	O08811	O08811;F6YA33;Q8K223;D3Z700;E9Q6K1;Q3UKK7	Ercc2	General transcription and DNA repair factor IIH helicase subunit XPD	ERCC2_MOUSE	8	10400.3	11659.9	10231.1	10844	9700.34	10732	11779.2	10507.1
O08832	Polypeptide N-acetylgalactosaminyltransferase 4	Galnt4	O08832	O08832	Galnt4	Polypeptide N-acetylgalactosaminyltransferase 4	GALT4_MOUSE	2	5286.44	4393.38	5168.51	4295	2961.96	4202.32	4340	4796.73
O08848	RNA-binding protein Ro60	RO60	O08848	O08848;Q3TJ75;Q8R562;Q80W12	RO60	RNA-binding protein Ro60	RO60_MOUSE	11	13774.3	12856	12619	13293.9	11288.8	13313.4	13826.6	13831.5
O08856	RNA polymerase II elongation factor ELL	Ell	O08856	O08856	Ell	RNA polymerase II elongation factor ELL	ELL_MOUSE	2	1743.21	1791.96	1371.79	1804.33	1107.6	1595.38	1699.46	1756.34
O08900	Zinc finger protein Aiolos	Ikzf3	O08900	O08900;G3UVV3;Q3UG26;Q3V1S4;Q62518;Q69ZC9;Q8BTD0;Q923D1	Ikzf3	Zinc finger protein Aiolos	IKZF3_MOUSE	3	19415.1	24604.1	20311.8	21873.6	19968.6	21841.3	23635	21109.5
O08911	Mitogen-activated protein kinase 12	Mapk12	O08911	O08911	Mapk12	Mitogen-activated protein kinase 12	MK12_MOUSE	9	9459.12	9685.33	9012.62	9380.18	7953.09	10321.3	8412.28	9634.77
O08912	Polypeptide N-acetylgalactosaminyltransferase 1	Galnt1	O08912	O08912;Q8CF93;A2RRI8;Q3UFE4	Galnt1	Polypeptide N-acetylgalactosaminyltransferase 1	GALT1_MOUSE	20	40298.7	40504.9	43106	41393.7	40313.1	43283.4	45209.7	43873
O08914	Fatty-acid amide hydrolase 1	Faah	O08914	O08914;Q3UUF0;Q8BRM1;Q8C541	Faah	Fatty-acid amide hydrolase 1	FAAH1_MOUSE	9	13478.3	18333.2	16184.5	12914.6	12229.1	11851.2	13912	12031
O08915	AH receptor-interacting protein	Aip	O08915	O08915	Aip	AH receptor-interacting protein	AIP_MOUSE	13	45827.7	36787.7	38809.1	44448.9	49022.9	40121.7	44108.1	41668.8
O08917	Flotillin-1	Flot1	O08917	O08917;Q540I4;G3UYU4;Q3TJS0	Flot1	Flotillin-1	FLOT1_MOUSE	31	32010.5	33937	33206.2	29047.5	33706.4	34454.2	38944.1	39161.3
O08918	Cyclin-G2	Ccng2	O08918	O08918;Q3TCL9;Q3TG40;Q5HZK4;Q8C9K5	Ccng2	Cyclin-G2	CCNG2_MOUSE	1	48628	58662.1	45118.8	46503.8	44031.4	38837.4	39054.4	43932
O08919	Numb-like protein	Numbl	O08919	O08919;Q3UH86	Numbl	Numb-like protein	NUMBL_MOUSE	2	5485.63	2494.05	3793.89	4879.5	3994.7	4686.87	3414.7	3866.83
O08966	Solute carrier family 22 member 1	Slc22a1	O08966	O08966	Slc22a1	Solute carrier family 22 member 1	S22A1_MOUSE	7	43420.8	61196.7	59159.8	41298.7	32199.2	35195.9	33225.8	32370.8
O08967	Cytohesin-3	Cyth3	O08967	O08967;Q3TXK1;Q5DTF5;G5E8Q4;Q3TGW1;Q8CBE4;Q922J4	Cyth3	Cytohesin-3	CYH3_MOUSE	4	16444.5	14747.4	15815.9	10366.3	14559.1	11568.3	13136.9	10493.4
O08970	Tuftelin	Tuft1	O08970	O08970;A0A0G2JDW8;Q3TAP8;Q3V1F5	Tuft1	Tuftelin	TUFT1_MOUSE	1	1156.83	826.77		916.289	521.915	937.905	1105.14	1207.59
O08983	BLOC-3 complex member HPS1	Hps1	O08983	O08983;Q3U309;A0A0R4J062;E9PYL0;E9Q045;Q3TBI2;Q5FWJ4;Q80VD7;Q8CD56	Hps1	BLOC-3 complex member HPS1	HPS1_MOUSE	4	4869.26	4485.34	4658.46	4373.22	5642.98	5867.73	6102.75	4294.05
O08989	Ras-related protein M-Ras	Mras	O08989	O08989;Q3TPX5	Mras	Ras-related protein M-Ras	RASM_MOUSE	4	8699.02	8996.12	8433.11	7897.42	7863.71	7655.72	7853.85	6956.3
O08992	Syntenin-1	Sdcbp	O08992	O08992;O88601;Q3TET7;Q3TMX0;Q3TWV1;Q3TXC7;Q3U6J5;Q3U6Q3;Q3U902;Q3UB97;Q3UBE4;Q3UC68	Sdcbp	Syntenin-1	SDCB1_MOUSE	5	32694	28879	28063.9	31255.8	36003.1	31822.4	31341	32554.5
O08997	Copper transport protein ATOX1	Atox1	O08997	O08997	Atox1	Copper transport protein ATOX1	ATOX1_MOUSE	6	197333	152315	128655	157016	197949	202843	195157	201246
O08999	Latent-transforming growth factor beta-binding protein 2	Ltbp2	O08999	O08999;E9Q1D6;E9QNQ3;Q0VD84	Ltbp2	Latent-transforming growth factor beta-binding protein 2	LTBP2_MOUSE	12	27851.5	11506.3	22189.3	28654.1	27204.3	23675.3	20979.9	21257.1
O09005	Sphingolipid delta(4)-desaturase DES1	Degs1	O09005	O09005	Degs1	Sphingolipid delta(4)-desaturase DES1	DEGS1_MOUSE	4	11744.5	15365.4	12410.6	13100.2	18629	17267.1	16022.3	14926.4
O09012	Peroxisomal targeting signal 1 receptor	Pex5	O09012	O09012;D3Z600	Pex5	Peroxisomal targeting signal 1 receptor	PEX5_MOUSE	12	15641.6	17412.2	16891.6	16931.8	17280.3	16320	16107.6	15052.3
O09030	Interleukin-13 receptor subunit alpha-1	Il13ra1	O09030	O09030;Q3UPQ9;Q8BNM4;Q8C1Z3	Il13ra1	Interleukin-13 receptor subunit alpha-1	I13R1_MOUSE	1		1624.15	1020.7	1107.67	577.229	1091.04		378.345
O09043	Napsin-A	Napsa	O09043	O09043;Q3TDT8;Q3U7H1;Q9DCS8;Q9JM79	Napsa	Napsin-A	NAPSA_MOUSE	6	510325	473704	394364	346996	1256420	1559390	1642130	1388810
O09044	Synaptosomal-associated protein 23	Snap23	O09044	O09044;Q9D3L3;A2AKH4;B0R030;B0R029;E9Q8A1	Snap23	Synaptosomal-associated protein 23	SNP23_MOUSE	11	37351.7	45217	49497.2	45639.9	42838.1	50785.9	45070.5	48480.4
O09046	L-amino-acid oxidase	Il4i1	O09046	O09046;D3Z4E0;A0A0R4J0C2	Il4i1	L-amino-acid oxidase	OXLA_MOUSE	1	4637.34		726.528				1553.05	2132.4
O09047	C3a anaphylatoxin chemotactic receptor	C3ar1	O09047	O09047;Q3U4N3;Q5U7A4;Q8C6R2	C3ar1	C3a anaphylatoxin chemotactic receptor	C3AR_MOUSE	1	960.832		2825.67	2542.62	1845.13	3345.89	2834.7	2793.89
O09049	Regenerating islet-derived protein 3-gamma	Reg3g	O09049	O09049;Q545I1	Reg3g	Regenerating islet-derived protein 3-gamma	REG3G_MOUSE	6	17188.8	8033.45	12592.7	131815	104172	105426	365645	261935
O09051	Guanylate cyclase activator 2B	Guca2b	O09051	O09051;Q9QUQ3	Guca2b	Guanylate cyclase activator 2B	GUC2B_MOUSE	3	4285.16	5928.06	6856.4	6568.06	13863.9	13760.1	10903.5	12812.7
O09061	Proteasome subunit beta type-1	Psmb1	O09061	O09061;Q6RI64;A0A338P7C0	Psmb1	Proteasome subunit beta type-1	PSB1_MOUSE	14	401838	414141	424551	401457	453898	499092	512301	523585
O09106	Histone deacetylase 1	Hdac1	O09106	O09106;Q58E49	Hdac1	Histone deacetylase 1	HDAC1_MOUSE	18	95777.8	92158.5	97258.4	91113	95708.8	95675.1	94860	95756.8
O09107	Insulin-like 3	Insl3	O09107	O09107;Q5RL10	Insl3	Insulin-like 3	INSL3_MOUSE	2	1696.73	1528.29	1970.97	1936	7506.32	5125.91	4288.85	4124.16
O09110	Dual specificity mitogen-activated protein kinase kinase 3	Map2k3	O09110	O09110;Q5SWN9;Q3TJG7;Q3TLX7;Q3TX82;Q3UDI2;A0A0R4J1Q6	Map2k3	Dual specificity mitogen-activated protein kinase kinase 3	MP2K3_MOUSE	4	9189.22	8816.61	10914.6	8057.48	6825.09	5907.26	4253.84	7001.27
O09111	NADH dehydrogenase [ubiquinone] 1 beta subcomplex subunit 11, mitochondrial	Ndufb11	O09111	O09111;Q4VBC9	Ndufb11	NADH dehydrogenase [ubiquinone] 1 beta subcomplex subunit 11, mitochondrial	NDUBB_MOUSE	3	169888	205468	188134	163677	148440	170233	171075	180215
O09114	Prostaglandin-H2 D-isomerase	Ptgds	O09114	O09114	Ptgds	Prostaglandin-H2 D-isomerase	PTGDS_MOUSE	8	36209.4	34984.2	27625.6	31044.7	67239.4	80306.3	97473.9	91793.6
O09117	Synaptophysin-like protein 1	Sypl1	O09117	O09117;Q3TVX7;Q3U4T9;D6RFU9	Sypl1	Synaptophysin-like protein 1	SYPL1_MOUSE	2	165220	159048	146291	148321	145795	147268	153382	163761
O09118	Netrin-1	Ntn1	O09118	O09118	Ntn1	Netrin-1	NET1_MOUSE	3	3918.89	4434.57	5308.29	4411.78	3759.1	3425.41	2914.44	3231.84
O09126	Semaphorin-4D	Sema4d	O09126	O09126;Q8BJC1	Sema4d	Semaphorin-4D	SEM4D_MOUSE	10	6437.65	7226.28	7311.26	7476.19	7244.73	7136.65	7622.42	6396.3
O09130	NFATC2-interacting protein	Nfatc2ip	O09130	O09130;A0A0U1RNY9	Nfatc2ip	NFATC2-interacting protein	NF2IP_MOUSE	1	2827.03	3919.86		5527.56	3183.78	2621.85	2837.43	4736.38
O09131	Glutathione S-transferase omega-1	Gsto1	O09131	O09131;A0A494BAB1	Gsto1	Glutathione S-transferase omega-1	GSTO1_MOUSE	21	419370	389613	404631	449489	480644	539006	500707	538325
O09159	Lysosomal alpha-mannosidase	Man2b1	O09159	O09159;Q3TB95;Q3TBM1	Man2b1	Lysosomal alpha-mannosidase	MA2B1_MOUSE	40	65407.8	60991.1	64388.2	69822.3	137492	140785	133747	126964
O09164	Extracellular superoxide dismutase [Cu-Zn]	Sod3	O09164	O09164;O88592;Q3UM12;Q542X9;Q64466	Sod3	Extracellular superoxide dismutase [Cu-Zn]	SODE_MOUSE	13	90585.2	102685	90549.4	95181.7	90364.5	78868.3	75940.5	76808.3
O09167	Large ribosomal subunit protein eL21	Rpl21	O09167	O09167;Q4VA28	Rpl21	Large ribosomal subunit protein eL21	RL21_MOUSE	11	160573	121462	132815	137612	133059	136093	125438	129331
O09172	Glutamate--cysteine ligase regulatory subunit	Gclm	O09172	O09172;Q4FJZ6;H3BJA3;Q3T9P2;A0A0G2JDI4	Gclm	Glutamate--cysteine ligase regulatory subunit	GSH0_MOUSE	15	83087.4	88338	99473.2	97655.4	93214.7	91093.8	76584.9	82573.3
O09173	Homogentisate 1,2-dioxygenase	Hgd	O09173	O09173;Q8CI38	Hgd	Homogentisate 1,2-dioxygenase	HGD_MOUSE	24	161063	241041	229813	156487	181992	163314	172255	160351
O09174	Alpha-methylacyl-CoA racemase	Amacr	O09174	O09174;Q3TUS8;Q91YQ8	Amacr	Alpha-methylacyl-CoA racemase	AMACR_MOUSE	25	80349.2	135116	116227	90984.6	75434.1	62243.6	59396.5	61495.8
O35054	Claudin-4	Cldn4	O35054	O35054;Q3UM35	Cldn4	Claudin-4	CLD4_MOUSE	3	27592.8	29490.3	21453	25180.6	22147.6	24846.5	27525.5	25969.7
O35071	Kinesin-like protein KIF1C	Kif1c	O35071	O35071;E9Q9B0;Q3V3Y9;Q6A011;Q8VI89	Kif1c	Kinesin-like protein KIF1C	KIF1C_MOUSE	2	3681.91	5033.65	4014.02	3431.52	5314.29	3316.17	3832.06	2644.32
O35074	Prostacyclin synthase	Ptgis	O35074	O35074	Ptgis	Prostacyclin synthase	PTGIS_MOUSE	17	28494.2	23195.6	21871.5	30684.2	28354.4	27389.8	27026.4	29599.6
O35075	Vacuolar protein sorting-associated protein 26C	Vps26c	O35075	O35075	Vps26c	Vacuolar protein sorting-associated protein 26C	VP26C_MOUSE	8	8427.9	6470.15	8113.09	6934.24	9098.23	9976.93	9557.72	8658.3
O35083	1-acyl-sn-glycerol-3-phosphate acyltransferase alpha	Agpat1	O35083	O35083;A0A0R4J263;G3UWV6;Q8BUB3;Q91VJ9	Agpat1	1-acyl-sn-glycerol-3-phosphate acyltransferase alpha	PLCA_MOUSE	5	23469.7	23823.7	25202.7	23139	20108.8	22808.4	23041.4	21596.1
O35098	Dihydropyrimidinase-related protein 4	Dpysl4	O35098	O35098;A0A0R4J1N0;Q3TMU8	Dpysl4	Dihydropyrimidinase-related protein 4	DPYL4_MOUSE	1	3998.68
O35099	Mitogen-activated protein kinase kinase kinase 5	Map3k5	O35099	O35099;E9PWG9;Q14AY4;A0A1L1ST18	Map3k5	Mitogen-activated protein kinase kinase kinase 5	M3K5_MOUSE	21	7215.84	8274.76	8722.94	8422.27	9976.9	8804.33	8263.91	8083.1
O35114	Lysosome membrane protein 2	Scarb2	O35114	O35114	Scarb2	Lysosome membrane protein 2	SCRB2_MOUSE	16	77465.2	68375.5	72357.9	78897.3	148080	147142	151113	129302
O35127	Protein C10	Grcc10	O35127	O35127	Grcc10	Protein C10	C10_MOUSE	2	9114.66	7769.46	8718.87	7487.83	8137.55	8673.81	8656.2	9306.39
O35129	Prohibitin-2	Phb2	O35129	O35129;Q3V235;F6Q8V7;F6QPR1;Q3V2V2	Phb2	Prohibitin-2	PHB2_MOUSE	27	216820	293180	251900	241051	220687	239907	258595	264469
O35130	Ribosomal RNA small subunit methyltransferase NEP1	Emg1	O35130	O35130;Q542P8;A0A0N4SUL6	Emg1	Ribosomal RNA small subunit methyltransferase NEP1	NEP1_MOUSE	4	6301.8	5983.26	7076.71	6129.3	6716.24	8294.16	7625.76	6838.07
O35134	DNA-directed RNA polymerase I subunit RPA1	Polr1a	O35134	O35134;A0A0U1RPX8;Q05BP7;Q05DK4;Q3TU49;Q3TUG2;Q3UHI3;Q80Y46;Q8BNM6;Q8BR29;Q8C2X2	Polr1a	DNA-directed RNA polymerase I subunit RPA1	RPA1_MOUSE	6	8047.13	6439.4	8980.85	9812.5	7412.43	8403.85	10292.6	7588.26
O35143	ATPase inhibitor, mitochondrial	Atp5if1	O35143	O35143;E9PV44	Atp5if1	ATPase inhibitor, mitochondrial	ATIF1_MOUSE	4	359174	259622	306509	331536	342193	359013	305374	294529
O35144	Telomeric repeat-binding factor 2	Terf2	O35144	O35144;D3YZ08;E9QM06;F6VIR4	Terf2	Telomeric repeat-binding factor 2	TERF2_MOUSE	6	11270.4	11666.7	11399.3	13206.3	13394.8	12259.5	11887.5	11666.7
O35149	Probable proton-coupled zinc antiporter SLC30A4	Slc30a4	O35149	O35149;A2AK40;Q148S1;Q3TM66	Slc30a4	Probable proton-coupled zinc antiporter SLC30A4	ZNT4_MOUSE	1	2293.02			1209.72		2115.43	2329.71	1787.07
O35153	BET1-like protein	Bet1l	O35153	O35153;A0A1B0GT05;A0A1B0GR52;A0A1B0GR53;A0A1B0GS34;A0A1B0GSF3;I6L979	Bet1l	BET1-like protein	BET1L_MOUSE	1	5138.45	3848.46	3936.72	2622.03	4104.33	3509.02	3113.15	3084.38
O35161	Cadherin EGF LAG seven-pass G-type receptor 1	Celsr1	O35161	O35161	Celsr1	Cadherin EGF LAG seven-pass G-type receptor 1	CELR1_MOUSE	2	1529.62	1947.81	2067.47	1608.34	1778.35	3173.09	1538.18	3574.3
O35166	Golgi SNAP receptor complex member 2	Gosr2	O35166	O35166;A2A9I0	Gosr2	Golgi SNAP receptor complex member 2	GOSR2_MOUSE	5	31378.1	31517.4	27602.8	35864.4	34850.2	30961.8	28989	26304
O35177	Enhancer of filamentation 1	Nedd9	O35177	O35177;A0A0R4J212	Nedd9	Enhancer of filamentation 1	CASL_MOUSE	1	3341.15	1565.5	2937	2485.74	2499.3	1825.08	2392.5	1975.95
O35188	Fractalkine	Cx3cl1	O35188	O35188;Q8C9Y1;A0A1D5RMK8	Cx3cl1	Fractalkine	X3CL1_MOUSE	5	33114.1	31059.9	33642.3	31894	34863.2	29745.1	29268.5	32011.2
O35205	Granzyme K	Gzmk	O35205	O35205;A4FUV8;D3Z594;Q9R0K0	Gzmk	Granzyme K	GRAK_MOUSE	2	1643.19	2481.85	2233.77	2633.93	6268.52	5591.69	5507.65	6404.23
O35206	Collagen alpha-1(XV) chain	Col15a1	O35206	O35206;A2AJY2;A2AJY5;A2AJY7	Col15a1	Collagen alpha-1(XV) chain	COFA1_MOUSE	21	189101	145517	165689	182171	187037	176925	177040	177882
O35215	D-dopachrome decarboxylase	Ddt	O35215	O35215;G3UZN1;Q3UNI8;G3UYJ7	Ddt	D-dopachrome decarboxylase	DOPD_MOUSE	8	234703	341380	242282	257019	241388	263790	260176	293739
O35216	Histone H3-like centromeric protein A	Cenpa	O35216	O35216;A0A0G2JEV2;A0A0G2JGI2	Cenpa	Histone H3-like centromeric protein A	CENPA_MOUSE	1	4684.03	5129.96	4802.08	6431.65	6107.55	5414.71	8052.63	6954.57
O35218	Cleavage and polyadenylation specificity factor subunit 2	Cpsf2	O35218	O35218;Q3UGU6;Q3URN8;Q3US33	Cpsf2	Cleavage and polyadenylation specificity factor subunit 2	CPSF2_MOUSE	22	21464.1	18530	19747.6	19955.2	19107.1	20355.1	20868.1	22100.9
O35219	Voltage-gated inwardly rectifying potassium channel KCNH2	Kcnh2	O35219	O35219;Q53Z09;A0A0R4J1K0;B1AR82;Q32ME0;Q80XE8;Q8BYS2;M0QW64	Kcnh2	Voltage-gated inwardly rectifying potassium channel KCNH2	KCNH2_MOUSE	1	18760.1	17685.3		19782.3		17913.5	16030.7	18204.3
O35226	26S proteasome non-ATPase regulatory subunit 4	Psmd4	O35226	O35226;Q3ULG4;Q9CY29	Psmd4	26S proteasome non-ATPase regulatory subunit 4	PSMD4_MOUSE	11	44433.9	44723.6	43089.8	48296.5	48653.1	46973.3	52695.7	52982.7
O35231	Kinesin-like protein KIFC3	Kifc3	O35231	O35231;A0A1D5RLM0;E9PWU7	Kifc3	Kinesin-like protein KIFC3	KIFC3_MOUSE	5	2136.8	2577.06	2315.9	2231.9	2058.55	1900.78	1108.02	2066.92
O35239	Tyrosine-protein phosphatase non-receptor type 9	Ptpn9	O35239	O35239;Q2M4G8	Ptpn9	Tyrosine-protein phosphatase non-receptor type 9	PTN9_MOUSE	16	20323.9	18663.7	21459.4	18916.8	20131.4	21809.2	22854	21972.7
O35242	Protein FAN	Nsmaf	O35242	O35242;Q8C7M6	Nsmaf	Protein FAN	FAN_MOUSE	3	6010.11	5595.38	5749.39	8089.04	6700.58	7738.4	5069.15	4961.51
O35245	Polycystin-2	Pkd2	O35245	O35245	Pkd2	Polycystin-2	PKD2_MOUSE	13	27615.5	26224.4	27897.9	27076.8	25167.9	26340	25955.2	23730
O35250	Exocyst complex component 7	Exoc7	O35250	O35250;A2AAN0;Q3TIP4;Q3USE0;Q542L0;Q69ZS4;Q7TPT3	Exoc7	Exocyst complex component 7	EXOC7_MOUSE	15	32061.7	30269.6	28345	25629.4	29329.3	25843.7	25705.8	26364.5
O35257	Prolactin-6A1	Prl6a1	O35257	A0A0M6L0L9;O35257;Q5SXJ8	Prl6a1	Prolactin-6A1	PR6A1_MOUSE	1	8503.66	16019.4	10520.9	10259.9	8457.26	10535	10006	10380.3
O35280	Serine/threonine-protein kinase Chk1	Chek1	O35280	O35280;G3UYC5;Q497T8	Chek1	Serine/threonine-protein kinase Chk1	CHK1_MOUSE	1							34645.2
O35286	ATP-dependent RNA helicase DHX15	Dhx15	O35286	O35286;A2A4P0;G3X8X0;Q3UKJ6;A0A0G2JG10;A2A4N9;Q3TFE5;Q3UDX4;Q3UQQ4;Q497W9;Q5DTN5;Q80TX4;Q921Y1;Q05BH3;Q3TUC8	Dhx15	ATP-dependent RNA helicase DHX15	DHX15_MOUSE	48	55840.6	50918.3	51127.3	51190.6	53315.9	56244.2	58632.1	58881.9
O35295	Transcriptional regulator protein Pur-beta	Purb	O35295	O35295;Q3UTJ8;Q8BQK8	Purb	Transcriptional regulator protein Pur-beta	PURB_MOUSE	10	109959	102566	102518	104816	108133	103951	105993	93446.7
O35298	Acyloxyacyl hydrolase	Aoah	O35298	O35298;B2RWZ3;Q3TAY1;Q3TDB1;Q3V0A4;Q4FK10	Aoah	Acyloxyacyl hydrolase	AOAH_MOUSE	13	28525	32332	33031.1	30570.6	51392.9	53227	47559.3	42840.1
O35309	N-myc-interactor	Nmi	O35309	O35309;Q3UJ82;Q4FJP2	Nmi	N-myc-interactor	NMI_MOUSE	14	40303.8	41151.2	52507.1	47399.7	69253.8	64268.2	56257	49699.4
O35316	Sodium- and chloride-dependent taurine transporter	Slc6a6	O35316	O35316;Q3UPI8	Slc6a6	Sodium- and chloride-dependent taurine transporter	SC6A6_MOUSE	5	43562.6	47122.7	42090.5	36872.7	43494.5	35633.8	36224.5	37469.1
O35326	Serine/arginine-rich splicing factor 5	Srsf5	O35326	O35326;Q5U448;Q9D8S5	Srsf5	Serine/arginine-rich splicing factor 5	SRSF5_MOUSE	10	158751	170989	165752	163163	181204	165186	195651	168861
O35343	Importin subunit alpha-3	Kpna4	O35343	O35343;A0A0B4J1E7;Q3UGH8;Q4FJX1	Kpna4	Importin subunit alpha-3	IMA3_MOUSE	4	2849.22	2722.75	3208.78	2984.24	2554.31	2782.11	2858.98	3171.33
O35344	Importin subunit alpha-4	Kpna3	O35344	O35344;Q543M7;Q9CT07	Kpna3	Importin subunit alpha-4	IMA4_MOUSE	8	31879.6	24202.3	31492.7	28644.3	31409.4	31208.1	30656.1	29053.7
O35345	Importin subunit alpha-7	Kpna6	O35345	O35345;Q4FJZ2;Q8BH30	Kpna6	Importin subunit alpha-7	IMA7_MOUSE	17	22752.5	21451.9	22120.5	19657.7	20557.6	21147.3	19606.2	21174.5
O35350	Calpain-1 catalytic subunit	Capn1	O35350	O35350;Q3TB79;Q3TI07;Q3UDG8;Q80Y25;Q8C2J1;A0A494BAC4;A0A494BAS0	Capn1	Calpain-1 catalytic subunit	CAN1_MOUSE	47	130843	120720	135977	137946	128098	135108	138707	151640
O35368	Interferon-activable protein 203	Ifi203	O35368	O35368;A0A1Z3MHZ5;A0A1Z3MI09;A0A1Z3MI20;A0A0R4J0H6;E9PUG6;E9QAN9	Ifi203	Interferon-activable protein 203	IFI3_MOUSE	1	2653.17	1899.47	3042	2918.54	2073.16	2104.2	1029.34
O35375	Neuropilin-2	Nrp2	O35375	O35375;Q3U5I8;Q8QZY7;Q8BPZ0	Nrp2	Neuropilin-2	NRP2_MOUSE	5	11502.1	10574	11180.2	12834.8	16885.3	12260	12369.8	12477.8
O35379	Multidrug resistance-associated protein 1	Abcc1	O35379	A5D6P3;O35379;Q8C7V6	Abcc1	Multidrug resistance-associated protein 1	MRP1_MOUSE	20	8706.6	9457.09	8845.79	8485.5	8385.56	7998.54	9171.04	9871.38
O35381	Acidic leucine-rich nuclear phosphoprotein 32 family member A	Anp32a	O35381	O35381;D3YYE1;D3Z7M9;F6UFG6	Anp32a	Acidic leucine-rich nuclear phosphoprotein 32 family member A	AN32A_MOUSE	13	384447	377904	352547	383944	309749	329711	360829	329791
O35382	Exocyst complex component 4	Exoc4	O35382	O35382;Q69ZD1;Q8CEG7	Exoc4	Exocyst complex component 4	EXOC4_MOUSE	22	34296.9	30189.7	31763.2	33184.8	35029.4	32601.1	32591	31170.2
O35385	Serine/threonine-protein phosphatase with EF-hands 2	Ppef2	O35385	O35385	Ppef2	Serine/threonine-protein phosphatase with EF-hands 2	PPE2_MOUSE	1	20101.3	27528	23999.7	26446.8	38678.6	40036.8	27109.2	34770.2
O35386	Phytanoyl-CoA dioxygenase, peroxisomal	Phyh	O35386	O35386;Q3TGP3;Q3TPC7	Phyh	Phytanoyl-CoA dioxygenase, peroxisomal	PAHX_MOUSE	16	27092.1	49025	37978.4	31716.9	28743.6	31398	33670.8	29069.5
O35387	HCLS1-associated protein X-1	Hax1	O35387	O35387;B9EJR4;A0A0G2JDP0;A0A0G2JE46;A0A0G2JFF9;Q3UXX9;Q8R5I5;A0A0G2JEE6;A0A0G2JFE1	Hax1	HCLS1-associated protein X-1	HAX1_MOUSE	7	147570	167598	174065	155600	159093	113009	116885	120735
O35405	5'-3' exonuclease PLD3	Pld3	O35405	O35405	Pld3	5'-3' exonuclease PLD3	PLD3_MOUSE	8	56531.7	54218.8	57214.4	62779.1	93849.1	100629	88262.9	99634.2
O35409	Glutamate carboxypeptidase 2	Folh1	O35409	O35409;Q9CZR2;Q0VDM6;G3UWC2;Q32MS9;Q3TTB7;Q3UZV6	Folh1	Glutamate carboxypeptidase 2	FOLH1_MOUSE	30	76897.1	109947	76404.2	65215.4	72547	76722.8	91436.6	79975.6
O35425	Bcl-2-related ovarian killer protein	Bok	O35425	O35425;Q3TH93;A0A087WR00	Bok	Bcl-2-related ovarian killer protein	BOK_MOUSE	3	14457.4	11498.3	11697.8	13127.5	14584	13355.6	15155.2	12683.8
O35435	Dihydroorotate dehydrogenase (quinone), mitochondrial	Dhodh	O35435	O35435;E9Q1V3;Q8BMJ0	Dhodh	Dihydroorotate dehydrogenase (quinone), mitochondrial	PYRD_MOUSE	16	32533.6	38371.3	33286.5	33262.1	28756.5	33774.5	31245.9	30500.3
O35448	Lysosomal thioesterase PPT2	Ppt2	O35448	O35448;E9Q0T0;G5E8W7	Ppt2	Lysosomal thioesterase PPT2	PPT2_MOUSE	5	22977.7	22373.9	22783.6	17743.5	30735	31990.4	26996.7	30661.4
O35450	FK506-binding protein-like	Fkbpl	O35450	O35450	Fkbpl	FK506-binding protein-like	FKBPL_MOUSE	1	6477.09	6610.24	7711.97	8746.37	21026.6	18490.1	15447.8	16703.5
O35453	Serine protease hepsin	Hpn	O35453	O35453;P21845;Q02844;Q924N9;Q99MS4;E9Q5P0;Q14B25;Q3U0U6;A0A0R4IZZ8;A0A3Q4EGI0;A0A3Q4L2Q9;A0AAA9WUU9;A0AAA9WWF0;A0AAA9WWF7;A1Z090;B5A5B0;B5A5B2;E9PY32;E9QJW9;E9QLD5;G3UWE8;Q921N4	Hpn	Serine protease hepsin	HEPS_MOUSE	8	10727.5	11998.4	12630.3	11575.3	22570.9	22152	21359.6	18935.6
O35454	H(+)/Cl(-) exchange transporter 6	Clcn6	O35454	O35454;A2A7F6;Q3UM91;Q5DU51;E9Q741	Clcn6	H(+)/Cl(-) exchange transporter 6	CLCN6_MOUSE	2		1535.37	633.512	805.51	1500.1	1491.94	1182.33	2165.13
O35459	Delta(3,5)-Delta(2,4)-dienoyl-CoA isomerase, mitochondrial	Ech1	O35459	O35459;F7B227	Ech1	Delta(3,5)-Delta(2,4)-dienoyl-CoA isomerase, mitochondrial	ECH1_MOUSE	14	59469.5	80007.8	68435	57078.6	68209.1	69438.2	73594.8	66298.8
O35464	Semaphorin-6A	Sema6a	O35464	O35464;D3YWM8;Q8BUT0;Q8BXZ7;F6WLW8	Sema6a	Semaphorin-6A	SEM6A_MOUSE	1	1170.18	1064.55	591.893	1001.78	711.758	1013.36	894.144	657.493
O35465	Peptidyl-prolyl cis-trans isomerase FKBP8	Fkbp8	O35465	O35465;C9K0Z7;F6WP10	Fkbp8	Peptidyl-prolyl cis-trans isomerase FKBP8	FKBP8_MOUSE	7	11197.2	9594.24	10338.5	14362.7	12340.8	10788.1	12776.6	9378.6
O35469	3 beta-hydroxysteroid dehydrogenase/Delta 5-->4-isomerase type 6	Hsd3b6	O35469	O35469;Q541Q1;Q76CU3;Q7TPU0	Hsd3b6	3 beta-hydroxysteroid dehydrogenase/Delta 5-->4-isomerase type 6	3BHS6_MOUSE	1	8747.5	19973.8	12132.3	8030.91	7826.49	5002.95	8599.96	7423.46
O35473	Nuclear nucleic acid-binding protein C1D	C1d	O35473	O35473;A0A0A0MQK7	C1d	Nuclear nucleic acid-binding protein C1D	C1D_MOUSE	2	4618.89	3654.64	5421	4813.9	3344.88	4839.78	4834.89	4434.73
O35488	Long-chain fatty acid transport protein 2	Slc27a2	O35488	O35488;A2ANX6;Q3TN99;Q3UNR3	Slc27a2	Long-chain fatty acid transport protein 2	S27A2_MOUSE	54	594659	827713	725671	601366	528144	535445	525521	479948
O35490	Betaine--homocysteine S-methyltransferase 1	Bhmt	O35490	O35490;Q91WS4	Bhmt	Betaine--homocysteine S-methyltransferase 1	BHMT1_MOUSE	4	7618.96	5706.84	1904.7	3140.34		725.802	1903.88	1930.19
O35491	Dual specificity protein kinase CLK2	Clk2	O35491	O35491;B2M0S2;B2M0S4;D3Z4P7;E9Q5Y1;F8WHX0;Q91YR2	Clk2	Dual specificity protein kinase CLK2	CLK2_MOUSE	1		2328.98		2300.46	2585.2
O35492	Dual specificity protein kinase CLK3	Clk3	O35492	O35492;A0A1L1SST3;A0A8Z1S2G3	Clk3	Dual specificity protein kinase CLK3	CLK3_MOUSE	7	8027.5	8211.9	8960.35	8249.36	7595.34	6709.79	7786	7852.4
O35493	Dual specificity protein kinase CLK4	Clk4	O35493	O35493;Q4FJV9	Clk4	Dual specificity protein kinase CLK4	CLK4_MOUSE	1	7432.89	5689.63	4227.19	4535.58	3012.1	3092.49	2969.39	3233.74
O35516	Neurogenic locus notch homolog protein 2	Notch2	O35516	O35516;Q3U1W7	Notch2	Neurogenic locus notch homolog protein 2	NOTC2_MOUSE	13	10303.5	8990.9	9826.25	11601.2	10419.1	10038.5	11678.2	10660.3
O35522	Proteasome subunit beta type-9	Psmb9	O35522;P28076	O35522;P28076;A0A0R4J256;Q3TAR7;Q3U7A7;Q4FK25;A0A494B9L1;G3UYK5	Psmb9	Proteasome subunit beta type-9	PSB9_MOUSE;PSB9_MUSMB	2	23785.6	17383.6	30489.9	27893.1	34952.3	33486.4	38002.4	30751
O35526	Syntaxin-1A	Stx1a	O35526	O35526;Q497P1;D6RFB9;Q5D0A4;A0A0J9YUA0	Stx1a	Syntaxin-1A	STX1A_MOUSE	2			2010.93					4168.35
O35551	Rab GTPase-binding effector protein 1	Rabep1	O35551	O35551;J3QJV7	Rabep1	Rab GTPase-binding effector protein 1	RABE1_MOUSE	20	13776.9	13337.6	12294.8	12629.1	13172.3	13605	12941.6	12816.9
O35566	CD151 antigen	Cd151	O35566	O35566;A0A1B0GSK8;A0A1B0GRG3	Cd151	CD151 antigen	CD151_MOUSE	7	53067.8	53482.2	52911.5	49341.7	46149.4	43591.6	48923.5	46177.2
O35593	26S proteasome non-ATPase regulatory subunit 14	Psmd14	O35593	O35593;Q3UD26;Q9CSU2	Psmd14	26S proteasome non-ATPase regulatory subunit 14	PSDE_MOUSE	10	41205.8	38095.5	39678.9	42638.1	43748.9	45730	47471.8	44459.6
O35594	Intraflagellar transport protein 81 homolog	Ift81	O35594	O35594;A0A0G2JFG8	Ift81	Intraflagellar transport protein 81 homolog	IFT81_MOUSE	4	11275.3	14078.8	16349.1	17390.1	15455.6	13524.8	13793.7	16718.9
O35598	Disintegrin and metalloproteinase domain-containing protein 10	Adam10	O35598	O35598;E9PYF2;D3Z1E6;Q6NZC0	Adam10	Disintegrin and metalloproteinase domain-containing protein 10	ADA10_MOUSE	24	72632.5	83113.5	77302.8	79821.3	73321.7	75719.6	80551.2	84867.3
O35601	FYN-binding protein 1	Fyb1	O35601	O35601;B2RUR0	Fyb1	FYN-binding protein 1	FYB1_MOUSE	6	15082.8	11800.3	14793.4	16915.4	15887.2	17849.3	15648.2	14501.8
O35604	NPC intracellular cholesterol transporter 1	Npc1	O35604	O35604;Q7TMD4;Q3U2B2;Q8BLK0	Npc1	NPC intracellular cholesterol transporter 1	NPC1_MOUSE	11	13718	11016	10562.1	13480.1	21350.9	21129.3	20745.7	21001.8
O35607	Bone morphogenetic protein receptor type-2	Bmpr2	O35607	O35607;Q3UER5;Q3UG09	Bmpr2	Bone morphogenetic protein receptor type-2	BMPR2_MOUSE	5	4995.42	7424.45	6536.3	5876.53	6424.56	6428.24	5105.72	5973.49
O35608	Angiopoietin-2	Angpt2	O35608	O35608;B9EHQ4	Angpt2	Angiopoietin-2	ANGP2_MOUSE	1	3272.62	3947.99	2427.13	2889.6	4174.83	2477.65	3399.76	3528.87
O35609	Secretory carrier-associated membrane protein 3	Scamp3	O35609	O35609;B2M0S2;E9Q855;Q3TDM8;Q3UK26;Q3UXS0	Scamp3	Secretory carrier-associated membrane protein 3	SCAM3_MOUSE	6	37126.1	22725.8	29402.6	29213.4	34827.5	27317.2	30156.5	32224.3
O35613	Death domain-associated protein 6	Daxx	O35613	O35613;Q3UKR0;A0A068BEP5;A1A558;Q3U0Z3;Q3UIV3;Q5XW53;G3UWI4;G3UWJ9;G3UX50	Daxx	Death domain-associated protein 6	DAXX_MOUSE	3	5495.85	3377.59	4675.93	6205.82	7271.02	4996.15	4068.03	3743.69
O35621	Phosphomannomutase 1	Pmm1	O35621	O35621;Q545Q8;Q91W01	Pmm1	Phosphomannomutase 1	PMM1_MOUSE	2	1624.03	2133.37	2554.41	2505.82	2972.75	2280.76	2648.24	2829.94
O35623	BET1 homolog	Bet1	O35623	O35623;Q8BNZ1	Bet1	BET1 homolog	BET1_MOUSE	1	10073.4	8790.59	7749.11	9959.26	9170.33	8303.08	8172.93	10703.7
O35625	Axin-1	Axin1	O35625	O35625;E9QMJ8;Q14DJ8;F6XWC2	Axin1	Axin-1	AXIN1_MOUSE	1	3871.11	5091.42	2653.05	2966.56	3095.24	5284.99	4201.91	3639.89
O35632	Hyaluronidase-2	Hyal2	O35632	O35632;Q3UZE4;Q542F2;A0A0A6YX37;Q8C309	Hyal2	Hyaluronidase-2	HYAL2_MOUSE	5	12969.2	16257.4	15153.5	14926.9	16431.2	16267.6	14907.5	15680.8
O35638	Cohesin subunit SA-2	Stag2	O35638	O35638;Q9D3E6;A2AFF6;F8WHU7;F6TNY1;F6XQW1;Q8BSB5	Stag2	Cohesin subunit SA-2	STAG2_MOUSE	23	14149.8	13767.2	13771.4	12323	13979.3	14186.5	15901.3	15742
O35639	Annexin A3	Anxa3	O35639	O35639;Q3TFK4;Q3TLP4;Q3U737;Q8C1X9	Anxa3	Annexin A3	ANXA3_MOUSE	28	276838	209991	241706	265487	300704	281097	289077	270333
O35640	Annexin A8	Anxa8	O35640	O35640;Q921D0	Anxa8	Annexin A8	ANXA8_MOUSE	3	2877.53	2683.49	1121.69	5171.94	3256.41	4387.33	3771.11	4710.08
O35643	AP-1 complex subunit beta-1	Ap1b1	O35643	O35643;Q9DBG3;H3BIY9;H3BKM0;Q3TVN4;Q3U1K9;Q5SVG4;Q5SVG5;Q5SWR1;Q8CC13	Ap1b1	AP-1 complex subunit beta-1	AP1B1_MOUSE	53	180612	182153	188128	176255	189904	189940	193373	203000
O35648	Centrin-3	Cetn3	O35648	O35648;A0A286YCB3;A0A286YD15;A0A286YDP0;A0A286YDS3;Q545L8;Q9CYN1;Q9D046	Cetn3	Centrin-3	CETN3_MOUSE	4	6020.38	5339.42	4235.78	4386.28	4292.98	4082.85	3986.72	3732.97
O35652	LIM/homeobox protein Lhx8	Lhx8	O35652	O35652;Q3TVH4	Lhx8	LIM/homeobox protein Lhx8	LHX8_MOUSE	1	5425.79
O35654	DNA polymerase delta subunit 2	Pold2	O35654	O35654;A8Y5G7	Pold2	DNA polymerase delta subunit 2	DPOD2_MOUSE	8	11572.5	9919.13	9794.6	7684.12	9760.5	9536.02	10412.9	8795.6
O35657	Sialidase-1	Neu1	O35657	O35657;Q3UL64;Q7TSW3	Neu1	Sialidase-1	NEUR1_MOUSE	13	63183.3	81459.8	79401.5	61549.3	143473	143588	157395	149749
O35658	Complement component 1 Q subcomponent-binding protein, mitochondrial	C1qbp	O35658	O35658;Q8R5L1	C1qbp	Complement component 1 Q subcomponent-binding protein, mitochondrial	C1QBP_MOUSE	4	50584.2	61402.8	55678.1	54623.9	48781	47028.1	44669.6	35602.8
O35660	Glutathione S-transferase Mu 6	Gstm6	O35660	O35660;G5E8M7;Q9D5J8	Gstm6	Glutathione S-transferase Mu 6	GSTM6_MOUSE	2	1683.9	1141.77	1688.33	2279.06	2400.05	1956.74		1868.47
O35664	Interferon alpha/beta receptor 2	Ifnar2	O35664	O35664;F6XX07;Q3UCC3;Q923Z6;Q9CS01;Q9D1R7	Ifnar2	Interferon alpha/beta receptor 2	INAR2_MOUSE	1	5432.2	4194.96	3460.54	3903.92	3716.8	3090.12	4579.29	2952.11
O35678	Monoglyceride lipase	Mgll	O35678	O35678;D3YYS6;E9Q3B9;Q3UFN1;Q3UFX6	Mgll	Monoglyceride lipase	MGLL_MOUSE	12	9593.85	8200.68	7303.97	6622.87	6535.11	7405.63	6293.99	6962.5
O35680	Small ribosomal subunit protein uS12m	Mrps12	O35680	O35680;E9PUY1	Mrps12	Small ribosomal subunit protein uS12m	RT12_MOUSE	2	16978.9	15831.3	16013.6	17870.1	16210.4	21402.3	19164.6	20711
O35682	Myeloid-associated differentiation marker	Myadm	O35682	O35682;Q0VE46;A0A0N4SW94	Myadm	Myeloid-associated differentiation marker	MYADM_MOUSE	4	32748.7	23969.3	27556.1	30973.6	32359.9	29492.1	22970.3	34031.9
O35683	NADH dehydrogenase [ubiquinone] 1 alpha subcomplex subunit 1	Ndufa1	O35683	O35683;Q545K0	Ndufa1	NADH dehydrogenase [ubiquinone] 1 alpha subcomplex subunit 1	NDUA1_MOUSE	2	40305.1	62520.6	42391.5	41857.4	36470.6	38835.6	38421	37527.7
O35684	Neuroserpin	Serpini1	O35684	O35684	Serpini1	Neuroserpin	NEUS_MOUSE	2		1818.04		2240.43	3759.96	3401.3	3067.23	3872.26
O35685	Nuclear migration protein nudC	Nudc	O35685	O35685	Nudc	Nuclear migration protein nudC	NUDC_MOUSE	21	101089	89961.7	95904.2	101163	105745	104420	98304.8	97471.3
O35691	Pinin	Pnn	O35691	O35691;Q3TUQ5;Q9CV89	Pnn	Pinin	PININ_MOUSE	16	25239.5	21584.2	22923.9	23952.9	25198.1	22841.5	24307.1	24807.2
O35704	Serine palmitoyltransferase 1	Sptlc1	O35704	O35704;Q3TTW4;Q3V3Z5;Q8C295	Sptlc1	Serine palmitoyltransferase 1	SPTC1_MOUSE	9	29065.2	28164.2	33254.4	29768.1	30130.8	32687.1	30323.2	32586.4
O35711	Liprin-beta-2	Ppfibp2	O35711	O35711;G3X957	Ppfibp2	Liprin-beta-2	LIPB2_MOUSE	10	5486.93	5771.78	5303.31	5401.58	4274.53	4760.58	3898.09	5243.8
O35714	Tumor necrosis factor receptor superfamily member 18	Tnfrsf18	O35714	O35714;Q8C4K3;B1ASL6;Q540M6	Tnfrsf18	Tumor necrosis factor receptor superfamily member 18	TNR18_MOUSE	1		193.589	178.646	591.059	477.522			317.479
O35728	Cytochrome P450 4A14	Cyp4a14	O35728	O35728	Cyp4a14	Cytochrome P450 4A14	CP4AE_MOUSE	20	14601.8	35993.6	14434.7	15941.4	18570	23184.9	30952	23693
O35730	E3 ubiquitin-protein ligase RING1	Ring1	O35730	O35730;A0A068BFS4	Ring1	E3 ubiquitin-protein ligase RING1	RING1_MOUSE	5	7995.53	8077.73	8363.73	7835.8	7944.36	8193.46	8743.36	8374.69
O35732	CASP8 and FADD-like apoptosis regulator	Cflar	O35732	O35732;A0A2C9F2D9;Q812G4	Cflar	CASP8 and FADD-like apoptosis regulator	CFLAR_MOUSE	1	3550.68	4582.09		2802.99	2764.61		2434.4	2331.47
O35737	Heterogeneous nuclear ribonucleoprotein H	Hnrnph1	O35737	O35737;Q3TNG9;Q811L7;Q8C2Q7	Hnrnph1	Heterogeneous nuclear ribonucleoprotein H	HNRH1_MOUSE	4	25101.6	26515.1	29619.4	20974.7	18089.6	17618	24829.3	20152.9
O35738	Krueppel-like factor 12	Klf12	O35738;Q60980	O35738;Q60980;A0A0G2JE66;Q545J5;Q8BV07	Klf12;Klf3	Krueppel-like factor 12	KLF12_MOUSE;KLF3_MOUSE	1	5498.52	7394.89	7096.89		8145.46	9047.99	6025.49
O35744	Chitinase-like protein 3	Chil3	O35744	O35744;Q91Z98	Chil3	Chitinase-like protein 3	CHIL3_MOUSE	22	564028	502563	414312	562099	918179	1136570	1126950	1303400
O35841	Apoptosis inhibitor 5	Api5	O35841	O35841;Q3UYQ4	Api5	Apoptosis inhibitor 5	API5_MOUSE	16	88555.1	70621.7	83433.9	82704.5	90526.2	87217.8	93183.5	91504
O35855	Branched-chain-amino-acid aminotransferase, mitochondrial	Bcat2	O35855	O35855;A0A1B0GX27;O88374;Q3ULU3;A0A1B0GST1;Q8CAX1	Bcat2	Branched-chain-amino-acid aminotransferase, mitochondrial	BCAT2_MOUSE	16	98483.5	154594	97427.7	110392	90192.4	85371	92762.9	107664
O35857	Mitochondrial import inner membrane translocase subunit TIM44	Timm44	O35857	O35857;Q8R3X4	Timm44	Mitochondrial import inner membrane translocase subunit TIM44	TIM44_MOUSE	23	24929.1	26854.9	24490	27123.5	27554	26371.3	24261.7	26283.5
O35864	COP9 signalosome complex subunit 5	Cops5	O35864	O35864;A0A087WQ60;A0A087WQA8;Q3V0K7	Cops5	COP9 signalosome complex subunit 5	CSN5_MOUSE	18	84307.6	79391.6	80309.6	68721.5	79822.4	82307.9	75924.5	79566.9
O35874	Neutral amino acid transporter A	Slc1a4	O35874	O35874;Q3UTP8;Q3US35;Q5SSP3;Q8BXT5;Q9ESU8	Slc1a4	Neutral amino acid transporter A	SATT_MOUSE	3	4382.8	5615.3	4003.37	3274.74	4123.88	3510.88	4607.23	3495.98
O35887	Calumenin	Calu	O35887	O35887;G3UWR0;G3UY49;Q3TQD1;Q3TUF3;Q3UG11	Calu	Calumenin	CALU_MOUSE	19	48607.2	43320.2	47303.1	60867.5	51533.1	45305.6	41847.2	40813.5
O35892	Nuclear autoantigen Sp-100	Sp100	O35892	O35892;Q3U0D6;Q3U5P2;Q3U876;A0A1B0GX24;D6RIJ4;E9Q4Y0;E9QA05;Q3UKD8;Q4FK53;Q6NTA3;Q8BNW8;Q8C405;Q8C9H3	Sp100	Nuclear autoantigen Sp-100	SP100_MOUSE	8	11035.8	10186.1	13200.4	13092.8	18399.5	14616.2	11776.2	10678.4
O35900	U6 snRNA-associated Sm-like protein LSm2	Lsm2	O35900	O35900;O35901;Q3U9X2;Q9EP83;Q9ES84	Lsm2	U6 snRNA-associated Sm-like protein LSm2	LSM2_MOUSE	9	21669.9	18147	20029.3	20266.6	17189	22582.9	21307.5	19230.3
O35904	Phosphatidylinositol 4,5-bisphosphate 3-kinase catalytic subunit delta isoform	Pik3cd	O35904	O35904;Q3T9Y0;B0QZL5;Q3TBW3;Q3UDT3;Q546P7;Q8BS14;Q8CI98	Pik3cd	Phosphatidylinositol 4,5-bisphosphate 3-kinase catalytic subunit delta isoform	PK3CD_MOUSE	6	7114.93	7670.57	6763.07	7055.45	6544.93	8250.69	7780.08	8317.74
O35929	GTP-binding protein REM 1	Rem1	O35929	O35929;B2RWZ4	Rem1	GTP-binding protein REM 1	REM1_MOUSE	5	5130.49	5997.24	6099.94	8843.78	7110.74	6831.86	5143.65	6643.18
O35930	Platelet glycoprotein Ib alpha chain	Gp1ba	O35930	O35930;A2CFB8	Gp1ba	Platelet glycoprotein Ib alpha chain	GP1BA_MOUSE	2	5907.48	3900.07	4716.39	5886.44	3722.61	3689.76	5232.68	4700.46
O35943	Frataxin, mitochondrial	Fxn	O35943	O35943;Q3TV21;Q6PDS4;Q3UG34	Fxn	Frataxin, mitochondrial	FRDA_MOUSE	5	17904.4	26494.3	20077.5	19025.8	19692.8	18730.7	21423.2	21047.1
O35945	Aldehyde dehydrogenase, cytosolic 1	Aldh1a7	O35945	O35945;B2RTL5	Aldh1a7	Aldehyde dehydrogenase, cytosolic 1	AL1A7_MOUSE	13	26852.1	29428.3	25851.8	22784.2	22055	19385.2	21101.6	18120.7
O35954	Membrane-associated phosphatidylinositol transfer protein 1	Pitpnm1	O35954	O35954	Pitpnm1	Membrane-associated phosphatidylinositol transfer protein 1	PITM1_MOUSE	10	50563.7	49347.9	50170.4	54047.6	57799.6	58027.3	57960.7	61082.1
O35955	Proteasome subunit beta type-10	Psmb10	O35955	O35955;Q3UNP9;Q4FJX8;Q920I3	Psmb10	Proteasome subunit beta type-10	PSB10_MOUSE	12	49898.2	49381.6	61336.9	57488.5	80294	71619.8	80768.7	68038.7
O35963	Ras-related protein Rab-33B	Rab33b	O35963	O35963;Q0PD21;Q3TCY0;Q3TQ93	Rab33b	Ras-related protein Rab-33B	RB33B_MOUSE	5	13460.7	11268.1	12406.4	13899.2	12636	10813.4	10451.4	10278.8
O35969	Guanidinoacetate N-methyltransferase	Gamt	O35969	O35969	Gamt	Guanidinoacetate N-methyltransferase	GAMT_MOUSE	7	29670.1	30784.9	32792	28838.8	32133.1	29336.3	29780.3	26336.7
O35972	Large ribosomal subunit protein uL23m	Mrpl23	O35972	O35972;A0A1B0GSZ9	Mrpl23	Large ribosomal subunit protein uL23m	RM23_MOUSE	6	20964.7	26012.1	22928.1	23034.2	22630.4	25031.4	22095.7	21699
O35988	Syndecan-4	Sdc4	O35988	O35988;Q3U5S6;Q3UKZ1;Q99LM6	Sdc4	Syndecan-4	SDC4_MOUSE	2	12468.2	10962.7	9489.17	11668.7	10420.8	10211.9	11095.3	9589.85
O54692	Centromere/kinetochore protein zw10 homolog	Zw10	O54692	O54692	Zw10	Centromere/kinetochore protein zw10 homolog	ZW10_MOUSE	9	8349	8265.89	10617.6	10391.9	8869.36	9786.49	9427.42	9092.65
O54724	Caveolae-associated protein 1	Cavin1	O54724	O54724	Cavin1	Caveolae-associated protein 1	CAVN1_MOUSE	11	33780.9	31463.8	29563.2	29348.1	29700	29631.4	26099.4	28347.9
O54734	Dolichyl-diphosphooligosaccharide--protein glycosyltransferase 48 kDa subunit	Ddost	O54734	O54734;Q3UC51;Q3UG68	Ddost	Dolichyl-diphosphooligosaccharide--protein glycosyltransferase 48 kDa subunit	OST48_MOUSE	14	221186	177658	223109	217489	221986	214417	199660	191966
O54749	Cytochrome P450 2J5	Cyp2j5	O54749	O54749;G3UZ38;Q3TNC5;Q3UEF7	Cyp2j5	Cytochrome P450 2J5	CP2J5_MOUSE	26	119155	172683	145060	133368	117988	106355	108378	98156.9
O54750	Cytochrome P450 2J6	Cyp2j6	O54750	O54750;Q8CC91	Cyp2j6	Cytochrome P450 2J6	CP2J6_MOUSE	1	1303.03	2415.51	1674.77	1363.04	1500.86	1876.14	1626.93
O54752	Naglu	Naglu	O54752;O88325	O54752;O88325	Naglu	Naglu	O54752_MOUSE;O88325_MOUSE	24	24296.2	23659.5	26847.5	25264.5	74189.3	86586.3	89118.1	76497.6
O54774	AP-3 complex subunit delta-1	Ap3d1	O54774	O54774;Q3U237;Q3UR54;Q05CQ3;Q8CGH7	Ap3d1	AP-3 complex subunit delta-1	AP3D1_MOUSE	34	22531.3	19187.4	20666.1	19168.1	21665.8	24158.8	23853.4	22032
O54781	SRSF protein kinase 2	Srpk2	O54781	O54781;A0A0R4J124;A0A0G2JG74;O08551;Q3TEK9;Q3TTG2;Q6P5E1	Srpk2	SRSF protein kinase 2	SRPK2_MOUSE	5	5171.05	5435.58	5556.06	3220.63	4203.79	3988.31	4539.5	4767.84
O54782	Epididymis-specific alpha-mannosidase	Man2b2	O54782	O54782;Q3TND6;F6TMZ3	Man2b2	Epididymis-specific alpha-mannosidase	MA2B2_MOUSE	28	45589.6	51360.2	47183.1	49182.5	92705.8	89590.1	83541	77183.7
O54784	Death-associated protein kinase 3	Dapk3	O54784	O54784;Q05A21	Dapk3	Death-associated protein kinase 3	DAPK3_MOUSE	6	36098.2	35434	36982.4	37894.4	35715.2	35347.1	35894.5	33780.2
O54786	DNA fragmentation factor subunit alpha	Dffa	O54786	O54786;Q8C535;Q8CA98	Dffa	DNA fragmentation factor subunit alpha	DFFA_MOUSE	2	5695.61	3946.88	3912.8	5385.1	4625.16	3221.49	3704.94	3832.34
O54788	DNA fragmentation factor subunit beta	Dffb	O54788	O54788;Q7TS81;Q8BP66	Dffb	DNA fragmentation factor subunit beta	DFFB_MOUSE	2	5550.75	5889.64	5607.63	5265.13	5186.67	6128.41	5150.19	4613.28
O54790	Transcription factor MafG	Maff	O54790;O54791;Q61827	O54790;Q61827;O54791;A0A1S6GWH7;Q3U0G5;Q3U568;Q3UKW6;Q3UP84	Maff;Mafg;Mafk	Transcription factor MafG	MAFF_MOUSE;MAFG_MOUSE;MAFK_MOUSE	1	3545.69	2497.32	4517.25	4318.66	3669.06	4202.95	5177.29	3214.09
O54794	Aquaporin-7	Aqp7	O54794	O54794;Q5DX24	Aqp7	Aquaporin-7	AQP7_MOUSE	1	1477.69	1239.77	1222.36	1138.89	2444.01	2084.69	1486.04	1911.54
O54804	Choline kinase alpha	Chka	O54804	O54804;F6S062	Chka	Choline kinase alpha	CHKA_MOUSE	6	8514.52	8270.86	8654.91	9431.62	9025.71	10125.4	7549.51	8239.29
O54818	Tumor protein D53	Tpd52l1	O54818	O54818;B2RUC1;A0A1L1SR11;A0A1L1ST53;Q3V2G6	Tpd52l1	Tumor protein D53	TPD53_MOUSE	2	1206.96	1597.5	1768.99	1943	1372.35	988.002	2639.56	2797.99
O54819	Tissue factor pathway inhibitor	Tfpi	O54819	O54819;A2ARA0;A2ARA3;Q8BSB7;Q8CI80;A2ARA4	Tfpi	Tissue factor pathway inhibitor	TFPI1_MOUSE	2	6633.87	5489.98	6345.33	5316.58	6027.67	5184.81	5391.68	4436.72
O54824	Pro-interleukin-16	Il16	O54824	O54824;Q3UZ81	Il16	Pro-interleukin-16	IL16_MOUSE	11	17906.6	12842	16389.6	18925.3	14742.3	16518.2	16787.4	16819.4
O54825	Bystin	Bysl	O54825	O54825;Q543N4	Bysl	Bystin	BYST_MOUSE	4	7232.28	5217.5	6858.65	6256.01	6629.57	7328.02	6136.16	7274.17
O54827	Phospholipid-transporting ATPase VA	Atp10a	O54827	O54827;Q3V1Y7;Q6A046;Q3TA23	Atp10a	Phospholipid-transporting ATPase VA	AT10A_MOUSE	1	1355.54			1519.62
O54829	Regulator of G-protein signaling 7	Rgs6	O54829;Q9Z2H2	O54829;Q9Z2H2;A0A087WPD1;A0A0A6YW36;A0A087WNZ9;A0A087WPC4;A0A087WPW1;A0A087WQG6;A0A087WRP8;A0A087WSH2;A0A087WSJ9;A0A0J9YTS6;F6WDS8;Q45FE1;Q45FE2;Q45FE4;Q45FE5;Q80XD3	Rgs6;Rgs7	Regulator of G-protein signaling 7	RGS6_MOUSE;RGS7_MOUSE	1		4872.05	5903.63	4296.24			2889.46	4426.26
O54833	Casein kinase II subunit alpha'	Csnk2a2	O54833	O54833;Q545V8;Q8BPF9;A0A1D5RM74;A0A1D5RLE4;A0A1D5RM55;Q8CDH5;Q8CEL6	Csnk2a2	Casein kinase II subunit alpha'	CSK22_MOUSE	10	38827.9	37160.5	40177.3	32940.9	43860.6	42822.6	45182.2	42871.9
O54865	Guanylate cyclase soluble subunit beta-1	Gucy1b1	O54865	O54865;Q3UTI4;Q80YP4	Gucy1b1	Guanylate cyclase soluble subunit beta-1	GCYB1_MOUSE	22	46279.8	49813.3	48990.9	51337.4	46917.3	44118.5	46917	49808
O54879	High mobility group protein B3	Hmgb3	O54879	O54879;A2AP78;Q544R9	Hmgb3	High mobility group protein B3	HMGB3_MOUSE	8	60372	54385.8	48424	59762.5	49853.6	52800.3	53698.1	54440.6
O54890	Integrin beta-3	Itgb3	O54890	O54890	Itgb3	Integrin beta-3	ITB3_MOUSE	13	15337.7	16768.1	14085.1	16186.5	14470.3	14764.3	13913.5	14456.5
O54901	OX-2 membrane glycoprotein	Cd200	O54901	O54901;Q80VX2;E9QMY1;E9PZI9;Q05D16	Cd200	OX-2 membrane glycoprotein	OX2G_MOUSE	7	30411.8	49905.2	36977.9	37583.9	30075.4	34073.8	36462.4	39814.9
O54909	Retinol dehydrogenase 16	Rdh16	O54909	O54909;D6RFQ4	Rdh16	Retinol dehydrogenase 16	RDH16_MOUSE	12	19050.7	29262.6	26309.1	20126.4	20950.7	26633.5	24214.3	25817.8
O54910	NF-kappa-B inhibitor epsilon	Nfkbie	O54910	O54910;A0A3B2WAY2;Q3U9Q0	Nfkbie	NF-kappa-B inhibitor epsilon	IKBE_MOUSE	2	2817.18	4218.99	3111.66	3142.22	1601.93	3577.08	2883.34	1468.07
O54916	RalBP1-associated Eps domain-containing protein 1	Reps1	O54916	O54916;A0A1L1SRE4;D3Z2E3;D6RIN6;E9Q632	Reps1	RalBP1-associated Eps domain-containing protein 1	REPS1_MOUSE	9	12459.4	10502.5	9859.7	10055.8	10550.6	11331.8	11212.4	10384
O54918	Bcl-2-like protein 11	Bcl2l11	O54918	O54918;Q542N5;Q3U7X3	Bcl2l11	Bcl-2-like protein 11	B2L11_MOUSE	1			550.953				548.622	480.395
O54931	PALM2-AKAP2 fusion protein	Pakap	O54931	O54931;A0A5F8MPZ6;A2API8;F7AA26;Q69ZV5;Q8C9L6;Q99L95	Pakap	PALM2-AKAP2 fusion protein	AKAP2_MOUSE	16	20156.7	19145.1	20647.6	23018.4	26870.5	25903.9	22750.7	24610.5
O54940	BCL2/adenovirus E1B 19 kDa protein-interacting protein 2	Bnip2	O54940	O54940;G5E8U9;Q3TTX3;Q3TWC8;Q91VL0;Q9D632	Bnip2	BCL2/adenovirus E1B 19 kDa protein-interacting protein 2	BNIP2_MOUSE	4	6827.72	6573.29	6890.42	6951.76	6184.68	6944.5	7702.04	6296.26
O54941	SWI/SNF-related matrix-associated actin-dependent regulator of chromatin subfamily E member 1	Smarce1	O54941	O54941;C0IMW9;C0IMX0;C0IMX1;C0IMX3	Smarce1	SWI/SNF-related matrix-associated actin-dependent regulator of chromatin subfamily E member 1	SMCE1_MOUSE	11	27305.6	25832.1	25412.1	26841.8	25904.8	25163.6	26578.3	25614.9
O54946	DnaJ homolog subfamily B member 6	Dnajb6	O54946	O54946;Q9QYI8;A0A0G2JEI3;A0A0G2JER9;A0A0G2JGN9;G3X8S5;Q3MI09;Q3MI10;Q9DAN5	Dnajb6	DnaJ homolog subfamily B member 6	DNJB6_MOUSE	3	8299.26	7894.37	7082.14	11586.5	6445.1	4173.01	5268.76	4405.28
O54950	5'-AMP-activated protein kinase subunit gamma-1	Prkag1	O54950	O54950;Q3TWR3;A0A2R8VHU2;Q2VPC9	Prkag1	5'-AMP-activated protein kinase subunit gamma-1	AAKG1_MOUSE	13	67800.5	55306.8	68495.4	59377.9	61895.5	72616.7	68019	69714
O54962	Barrier-to-autointegration factor	Banf1	O54962	O54962	Banf1	Barrier-to-autointegration factor	BAF_MOUSE	5	250117	299181	243372	251803	280900	285196	302344	238392
O54965	E3 ubiquitin-protein ligase RNF13	Rnf13	O54965	O54965;A0A0G2JEM4;A0A0G2JGT7;Q3TJV7;Q3UTG4;Q8C4F9;Q8CB78	Rnf13	E3 ubiquitin-protein ligase RNF13	RNF13_MOUSE	4	9799.4	10467.6	10360.6	9178.92	22567.4	23560.8	20029	20645.4
O54983	Ketimine reductase mu-crystallin	Crym	O54983	O54983;Q3UPX0	Crym	Ketimine reductase mu-crystallin	CRYM_MOUSE	14	37631.6	38065.3	36205.6	34916.8	42769.6	47328	42473.4	44583.8
O54984	ATPase GET3	Get3	O54984	O54984;Q8C1Q1;Q8VEI6	Get3	ATPase GET3	GET3_MOUSE	11	232827	250822	244071	261099	270108	225560	273021	252223
O54988	STE20-like serine/threonine-protein kinase	Slk	O54988	O54988;A2RRK3	Slk	STE20-like serine/threonine-protein kinase	SLK_MOUSE	20	18502.3	16839.4	17672.2	19025.5	16115.2	15749	16456.2	17131.5
O54990	Prominin-1	Prom1	O54990	O54990;G5E8G5;A0A0G2JE50;A0A0R4J0B0;G3X9J8;Q8C3K1;Q8CDK8;Q8R056;A0A0G2JDH9;A0A0G2JG30	Prom1	Prominin-1	PROM1_MOUSE	15	25570.9	21444.8	25394	27885.8	21504	25805.7	24005.4	25490.2
O54992	MAP kinase-activated protein kinase 5	Mapkapk5	O54992	O54992;A0A0G2JDU2;Q3UV25;A0A0G2JDF3	Mapkapk5	MAP kinase-activated protein kinase 5	MAPK5_MOUSE	1	2027.1	2755.91	3604.61	2718.94	2946.95	2490.87	3189.46	2824.46
O54998	Peptidyl-prolyl cis-trans isomerase FKBP7	Fkbp7	O54998	O54998;H3BJI5;Q3UU11	Fkbp7	Peptidyl-prolyl cis-trans isomerase FKBP7	FKBP7_MOUSE	5	4933.51	3475.11	4362.93	4705.52	5707.11	5019.53	5027.01	4778.32
O55013	Trafficking protein particle complex subunit 3	Trappc3	O55013	O55013;Q3U9K9	Trappc3	Trafficking protein particle complex subunit 3	TPPC3_MOUSE	8	25071.6	27820.4	31343.9	27924.7	34691.9	34940.8	36233.2	33813
O55022	Membrane-associated progesterone receptor component 1	Pgrmc1	O55022	O55022;Q3TXU8;Q3TFP8;Q3TH84	Pgrmc1	Membrane-associated progesterone receptor component 1	PGRC1_MOUSE	8	368745	478295	435803	414025	412430	443820	440401	426431
O55023	Inositol monophosphatase 1	Impa1	O55023	O55023;Q3TME6;Q3U5R8;Q80ZJ2;Q924B0;Q9D066;A0A0A6YW07	Impa1	Inositol monophosphatase 1	IMPA1_MOUSE	22	151256	150151	161330	161126	166590	179203	176852	181905
O55026	Ectonucleoside triphosphate diphosphohydrolase 2	Entpd2	O55026	O55026;Q3T9U8;Q921R1	Entpd2	Ectonucleoside triphosphate diphosphohydrolase 2	ENTP2_MOUSE	8	20490	21156.9	21776.3	18716.8	22986.7	23657	24410.6	22724
O55028	Branched-chain alpha-ketoacid dehydrogenase kinase	Bckdk	O55028	O55028;A0A0U1RNL7;A0A0U1RPT4;A0A0U1RQ97;D3Z7R0;Q3UC13;Q3UCB5;Q8C6H9	Bckdk	Branched-chain alpha-ketoacid dehydrogenase kinase	BCKD_MOUSE	8	13928.4	18110	12436.4	14481.9	15910.9	14069.7	12875.3	13339.8
O55029	Coatomer subunit beta'	Copb2	O55029	O55029	Copb2	Coatomer subunit beta'	COPB2_MOUSE	40	66075.2	54999.2	63565.1	62738.7	66195.7	70699.4	70306.2	65671.8
O55033	Cytoplasmic protein NCK2	Nck2	O55033	O55033;Q8BQ28;A0A0A0MQF0;A0A0J9YUK4	Nck2	Cytoplasmic protein NCK2	NCK2_MOUSE	10	11832.8	10258.8	10505.2	10725.4	12573.6	11377	11194.5	11715.8
O55042	Alpha-synuclein	Snca	O55042	O55042	Snca	Alpha-synuclein	SYUA_MOUSE	6	6808.82	7262.35	6525.5	6920.23	7859.07	6722.92	4761.18	21904.6
O55057	Retinal rod rhodopsin-sensitive cGMP 3',5'-cyclic phosphodiesterase subunit delta	Pde6d	O55057	O55057;Q3TDQ8;Q3URU9;M0QWG6;M0QWR1	Pde6d	Retinal rod rhodopsin-sensitive cGMP 3',5'-cyclic phosphodiesterase subunit delta	PDE6D_MOUSE	4	4941.49	4783.92	4423.94	4563.51	5351.42	5629.35	4528.33	5601.94
O55060	Thiopurine S-methyltransferase	Tpmt	O55060	O55060;A0A0R4J018;D3YWK6;D3Z217;D3Z380	Tpmt	Thiopurine S-methyltransferase	TPMT_MOUSE	20	93820.2	132015	119949	103573	103834	105123	99416.2	95324
O55091	Protein IMPACT	Impact	O55091	O55091;A0A3Q4EC12	Impact	Protein IMPACT	IMPCT_MOUSE	5	5650.21	6565.88	7513.42	6448.44	8844.28	8451.22	7184.79	7721.24
O55098	Serine/threonine-protein kinase 10	Stk10	O55098	O55098;A1A553;Q5DTS2	Stk10	Serine/threonine-protein kinase 10	STK10_MOUSE	8	9121.11	7634	7715.78	8991.95	7277.8	7654.53	6670.92	7321.72
O55100	Synaptogyrin-1	Syngr1	O55100	O55100;Q3U6D7	Syngr1	Synaptogyrin-1	SNG1_MOUSE	1	7542.12	6520.04	8993.48	6853.57	6569.46	7333.15	7504.9	8664.33
O55101	Synaptogyrin-2	Syngr2	O55101	O55101;B0QZP8;H3BIZ8;H3BJ78;H3BJY1;H3BKF4	Syngr2	Synaptogyrin-2	SNG2_MOUSE	1	21621.9	13446	16823.9	10588.4	12910.1	22434.2	16956.2	14165.3
O55102	Biogenesis of lysosome-related organelles complex 1 subunit 1	Bloc1s1	O55102	O55102;D3YVM8;D3Z4L7	Bloc1s1	Biogenesis of lysosome-related organelles complex 1 subunit 1	BL1S1_MOUSE	4	16994.3	13062.3	14761.3	16115	19069	18226.8	17574.1	17614.3
O55103	Periaxin	Prx	O55103	O55103;A0A0U1RNK1;A0A5F8MQ58;E9QQ57;Q69ZE6;Q6NVF7	Prx	Periaxin	PRAX_MOUSE	1				3215.68	2414.22
O55106	Striatin	Strn	O55106	O55106;F8WH41;Q3UWX9	Strn	Striatin	STRN_MOUSE	17	22035.9	20264.3	22023.5	22946.1	23350.6	23539.2	24307.3	23455.2
O55111	Desmoglein-2	Dsg2	O55111	O55111;Q8BK55	Dsg2	Desmoglein-2	DSG2_MOUSE	11	8499.8	7125.02	6869.49	8345.16	9036.26	7714.72	9600.12	7521.05
O55125	Protein NipSnap homolog 1	Nipsnap1	O55125	O55125;Q3UGS1;Q5SVF7	Nipsnap1	Protein NipSnap homolog 1	NIPS1_MOUSE	10	140904	234824	186041	155126	152532	165250	153338	158418
O55126	Protein NipSnap homolog 2	Nipsnap2	O55126	O55126;Q7TMG8;Q3TD78	Nipsnap2	Protein NipSnap homolog 2	NIPS2_MOUSE	10	108162	145924	123584	131878	121355	117619	123432	135604
O55128	Histone deacetylase complex subunit SAP18	Sap18	O55128	O55128;E9Q317;Q4FZH3;D3YY55	Sap18	Histone deacetylase complex subunit SAP18	SAP18_MOUSE	9	56107.8	54340.7	56774.7	46695.6	50810.7	53331.1	49371.3	52123.1
O55131	Septin-7	Septin7	O55131	O55131;E9Q1G8;E9Q9F5;Q3UNN1;Q5DTS3;Q8C2A3	Septin7	Septin-7	SEPT7_MOUSE	21	76372.8	67197.5	70982.9	73640	77941.4	77679.6	84270.4	80876.1
O55134	Protocadherin-12	Pcdh12	O55134	O55134;Q8C883	Pcdh12	Protocadherin-12	PCD12_MOUSE	1	1053.39	1732.91	1439.4	2367.87	608.563	1334.43	2389.68	1664.8
O55135	Eukaryotic translation initiation factor 6	Eif6	O55135	O55135;Q3U740;Q3U818;Q3UA13;Q3UBJ6;Q545K4;Q9R071	Eif6	Eukaryotic translation initiation factor 6	IF6_MOUSE	11	151286	133912	119356	117394	172860	174798	177180	166255
O55137	Acyl-coenzyme A thioesterase 1	Acot1	O55137	O55137;Q6Q2Z6;Q8BWN8;Q9QYR7;Q32Q92;Q14DI6;Q53YL1;Q91YQ6;A0A1Y7VML8;A0A1Y7VMZ4;B2RTE4;Q99L15	Acot1	Acyl-coenzyme A thioesterase 1	ACOT1_MOUSE	19	114781	157294	118061	123694	128031	123787	134756	127447
O55142	Large ribosomal subunit protein eL33	Rpl35a	O55142	O55142;Q6ZWX1;Q8BQV7;Q9DC85	Rpl35a	Large ribosomal subunit protein eL33	RL35A_MOUSE	9	92933.2	69587.2	85043.2	81338.3	90664.6	88429.1	97406.1	90102.3
O55143	Sarcoplasmic/endoplasmic reticulum calcium ATPase 2	Atp2a2	O55143	O55143;Q5DTI2;O54994	Atp2a2	Sarcoplasmic/endoplasmic reticulum calcium ATPase 2	AT2A2_MOUSE	54	115784	116323	127155	121776	118865	119937	121220	127001
O55176	E3 ubiquitin-protein ligase Praja-1	Pja1	O55176	O55176;Q05CG5;Q3UXQ1	Pja1	E3 ubiquitin-protein ligase Praja-1	PJA1_MOUSE	1		2857.31		8251.76		5148.57		4894.47
O55186	CD59A glycoprotein	Cd59a	O55186	O55186;A2BI31;Q920G6	Cd59a	CD59A glycoprotein	CD59A_MOUSE	2	12183.6	12612.5	9195.22	8761.86	11035.8	11276.5	7854.79	12504.5
O55201	Transcription elongation factor SPT5	Supt5h	O55201	O55201	Supt5h	Transcription elongation factor SPT5	SPT5H_MOUSE	21	24340.5	22632.6	23252.9	21529.9	21921.8	23997.1	24332	22167.3
O55222	Scaffold protein ILK	Ilk	O55222	O55222;A0A1B0GR42;A0A1B0GRF6;D3YZA5	Ilk	Scaffold protein ILK	ILK_MOUSE	37	104291	116173	100485	118835	95714	85303	87613.3	91285.3
O55226	Chondroadherin	Chad	O55226	O55226;Q3TYW1	Chad	Chondroadherin	CHAD_MOUSE	1					4007.51	4148.77	3586.5	5244.88
O55229	Choline/ethanolamine kinase	Chkb	O55229	O55229;F6RRT7;F6SKI6;Q54AG5;Q6NVC1	Chkb	Choline/ethanolamine kinase	CHKB_MOUSE	13	41468.5	40521.9	40430.4	39018.7	41616.8	44383.7	42467.2	45931.3
O55234	Proteasome subunit beta type-5	Psmb5	O55234	O55234;Q8BTY5	Psmb5	Proteasome subunit beta type-5	PSB5_MOUSE	13	69117.4	69466.6	75537	66441.6	65726.2	70753.1	75521.9	80023.9
O55236	mRNA-capping enzyme	Rngtt	O55236	O55236;Q3UA94;Q9DCC1;Q3TUK6;Q3UCK1	Rngtt	mRNA-capping enzyme	MCE1_MOUSE	6	2885.11	3472	2792.06	3857.12	2063.2	2441.02	2362.37	2843.98
O55239	Nicotinamide N-methyltransferase	Nnmt	O55239	O55239;D3YX59	Nnmt	Nicotinamide N-methyltransferase	NNMT_MOUSE	3	10938.4	10811	8543.6	13083.8	11695.3	10996.9	10027.8	8631.56
O55242	Sigma non-opioid intracellular receptor 1	Sigmar1	O55242	O55242;B7ZJH6;B7ZJH7;B7ZJH9	Sigmar1	Sigma non-opioid intracellular receptor 1	SGMR1_MOUSE	4	15455.8	15402.7	15624.2	18103.3	17585.1	18368.6	17433.6	14958.8
O70122	Sodium/glucose cotransporter 1 (Fragment)	Slc5a1	O70122;Q8CCA7;Q9QXI6;Q9QXX5	Q9QXI6;O70122;Q8CCA7;Q9QXX5	Slc5a1	Sodium/glucose cotransporter 1 (Fragment)	O70122_MOUSE;Q8CCA7_MOUSE;Q9QXI6_MOUSE;Q9QXX5_MOUSE	1	12904.2	11364.4	14311.3	13491.7	12666	10891.2	13788.3	10342.3
O70131	Ninjurin-1	Ninj1	O70131	O70131;D3YW25;Q8BP68;D6RFN5;Q3TXT8	Ninj1	Ninjurin-1	NINJ1_MOUSE	2	1350.52	1774.55	1283.17	453.201	1949.1		1018.68
O70133	ATP-dependent RNA helicase A	Dhx9	O70133	E9QNN1;O70133;A0A087WPL5;Q3UR42;A0A087WRT3;A0A0R4J2C3	Dhx9	ATP-dependent RNA helicase A	DHX9_MOUSE	60	145915	147350	151148	135347	129825	136252	150423	148861
O70138	Neutrophil collagenase	Mmp8	O70138	O70138;Q3TAV4;Q3TCE6;Q3TD42;Q3U1P0;Q8C209;Q8C230	Mmp8	Neutrophil collagenase	MMP8_MOUSE	7	11572.4	9611.07	9754.02	10251.4	7256.71	8638.21	8396.07	13996.2
O70145	Neutrophil cytosol factor 2	Ncf2	O70145	O70145;Q1PCS1	Ncf2	Neutrophil cytosol factor 2	NCF2_MOUSE	16	20098.4	17315.9	19437.9	22567.1	19391.3	20037	18732.5	23578.9
O70152	Dolichol-phosphate mannosyltransferase subunit 1	Dpm1	O70152	O70152;F8WII3	Dpm1	Dolichol-phosphate mannosyltransferase subunit 1	DPM1_MOUSE	10	36166	40000.2	35966.5	34486.8	33572.8	40759	40644	38615.4
O70161	Phosphatidylinositol 4-phosphate 5-kinase type-1 gamma	Pip5k1c	O70161	O70161;F8WHW6	Pip5k1c	Phosphatidylinositol 4-phosphate 5-kinase type-1 gamma	PI51C_MOUSE	5	7656.41	7302.64	8991.2	9519.77	9208.23	9830.72	9727.89	10234.2
O70165	Ficolin-1	Fcn1	O70165	O70165;Q2WFW2;Q4FJM1	Fcn1	Ficolin-1	FCN1_MOUSE	3	4036.17	3922.04	4239.57	4246.26	2438.06	4099.84	3365.5	3993.94
O70172	Phosphatidylinositol 5-phosphate 4-kinase type-2 alpha	Pip4k2a	O70172	O70172;Q80XI4;Q544E3;Q9CZS7;Q3UJ95	Pip4k2a	Phosphatidylinositol 5-phosphate 4-kinase type-2 alpha	PI42A_MOUSE	15	269085	239853	267957	296490	257505	279674	278628	272059
O70194	Eukaryotic translation initiation factor 3 subunit D	Eif3d	O70194	O70194	Eif3d	Eukaryotic translation initiation factor 3 subunit D	EIF3D_MOUSE	17	76799.4	66645.2	71901.5	76740.4	79918.4	71614.5	74223.7	74448.1
O70200	Allograft inflammatory factor 1	Aif1	O70200	O70200;Q4FJL9;A1E2H8;G3UYJ2;Q9EQW9	Aif1	Allograft inflammatory factor 1	AIF1_MOUSE	7	24495.4	14858	23226.5	26827.8	25582.2	21220.1	20768.7	18438.1
O70209	PDZ and LIM domain protein 3	Pdlim3	O70209	O70209;A0A1B0GSX6	Pdlim3	PDZ and LIM domain protein 3	PDLI3_MOUSE	4	6233.84	7667.53	6561.08	7257.28	8144.52	7945.95	6740.68	7356.73
O70228	Probable phospholipid-transporting ATPase IIA	Atp9a	O70228	O70228;A2AQC3;Q505G9;Q6DI68;Q8C288;Q8C4G3	Atp9a	Probable phospholipid-transporting ATPase IIA	ATP9A_MOUSE	5	6587.2	5771.95	8089.74	6676.03	8448.41	8377.97	7463.94	8888.84
O70230	Zinc finger protein 143	Znf143	O70230;Q8BMU0	O70230;Q8BMU0;A0A3B2W3I6;A0A3B2W4C6;A0A3B2W7W5;B2KF19;Q60921	Znf143;Znf76	Zinc finger protein 143	ZN143_MOUSE;ZNF76_MOUSE	1		2881.76		3125.19	2593.49	2231.43	3603.6
O70250	Phosphoglycerate mutase 2	Pgam2	O70250	O70250;Q5NCI4	Pgam2	Phosphoglycerate mutase 2	PGAM2_MOUSE	14	110029	160639	124272	128376	99306.7	79016.5	90057.3	98263.5
O70251	Elongation factor 1-beta	Eef1b	O70251	O70251;A0A087WS46	Eef1b	Elongation factor 1-beta	EF1B_MOUSE	8	189442	181420	194421	218139	225127	193905	206737	198139
O70252	Heme oxygenase 2	Hmox2	O70252	O70252;D3YX62;Q3U6W4;Q544R7	Hmox2	Heme oxygenase 2	HMOX2_MOUSE	20	48797.2	46715.5	51302.3	55279.5	57431.5	53402.9	51562.2	53111.3
O70273	ETS homologous factor	Ehf	O70273;Q3UPW2	Q3UPW2;O70273;A2BIB5;B0S7M9	Ehf;Elf3	ETS homologous factor	EHF_MOUSE;ELF3_MOUSE	1	4002.39	3004.97	3410.05	3487.51	3892.33	4673.45	3049.13	5564.59
O70274	Protein tyrosine phosphatase type IVA 2	Ptp4a2	O70274	O70274	Ptp4a2	Protein tyrosine phosphatase type IVA 2	TP4A2_MOUSE	5	13930.3	10537.2	9467.29	11873	10871.8	13645.9	11904.2	10935.3
O70281	Protein-tyrosine sulfotransferase 1	Tpst1	O70281	O70281;Q4FK50	Tpst1	Protein-tyrosine sulfotransferase 1	TPST1_MOUSE	1	1241.84			866.415	1261.06	622.717		807.123
O70293	G protein-coupled receptor kinase 6	Grk6	O70293	O70293;A0A286YDA5;A0A286YDZ5;A0A286YE10;O70296;Q3TTW2;Q3UK88;Q792R0;Q9EP84	Grk6	G protein-coupled receptor kinase 6	GRK6_MOUSE	5	6640.74	5015.4	6949.96	5342.77	7810.98	6298.27	4646.22	5711.83
O70305	Ataxin-2	Atxn2	O70305	O70305;E9QM77;F6U2C2;F6V8M6;F7B6X4;Q3UX07;Q3UX51	Atxn2	Ataxin-2	ATX2_MOUSE	6	19736.8	21323.6	21035.9	21083	28347.3	26656.7	28400.4	24317.9
O70309	Integrin beta-5	Itgb5	O70309	O70309;G5E8F8;Q6PE70	Itgb5	Integrin beta-5	ITB5_MOUSE	17	127663	109697	114775	137584	126116	121439	123144	120451
O70310	Glycylpeptide N-tetradecanoyltransferase 1	Nmt1	O70310	O70310;O70311;Q3THR4;Q3UJC3;A2AJH3;F7APP3	Nmt1	Glycylpeptide N-tetradecanoyltransferase 1	NMT1_MOUSE	11	42343.2	47736.5	40018.7	41161.5	43826.1	39373.4	40135.3	39242.5
O70311	Glycylpeptide N-tetradecanoyltransferase 2	Nmt2	O70311	O70311;Q3THR4;A2AJH3;F7APP3	Nmt2	Glycylpeptide N-tetradecanoyltransferase 2	NMT2_MOUSE	7	10709.6	9276.16	9112.91	10026.3	13490.8	11999.5	10312.8	9708.27
O70318	Band 4.1-like protein 2	Epb41l2	O70318	O70318;Q3UNQ6;Q80UE3;Q811B2;A0A1W2P6I5;B6ZHC5;B6ZHC6;B6ZHC7;B6ZHD0;Q80UE4;Q80UE5;Q811C0;Q8C928;Q8CGJ6	Epb41l2	Band 4.1-like protein 2	E41L2_MOUSE	36	43738.1	35191.7	36345.6	43400	47371.2	45283.5	44535.1	45449.1
O70324	Monocarboxylate transporter 8	Slc16a2	O70324	O70324;Q05BA2;Q8K3S7	Slc16a2	Monocarboxylate transporter 8	MOT8_MOUSE	1	3442.52	3663.28	3716.99	2471.68	2083.68	1957.38	2821.23	2007.73
O70325	Phospholipid hydroperoxide glutathione peroxidase GPX4	Gpx4	O70325	O70325;Q3TIF2;Q76LV0;Q3TI34;Q5XJZ8;S4R1E5	Gpx4	Phospholipid hydroperoxide glutathione peroxidase GPX4	GPX4_MOUSE	15	194487	224168	216908	200527	166341	167005	169611	183883
O70337	Bcl-2-interacting killer	Bik	O70337	O70337;A0A2R8VI69;A0A2R8W6U8;Q99L97	Bik	Bcl-2-interacting killer	BIK_MOUSE	1	2104.56	2795.46	2280.67	2576.28	2394.77	2059.21	2958.35	2191.03
O70338	Ribonuclease H1	Rnaseh1	O70338	O70338;E9QLN8;A0A1Y7VM77	Rnaseh1	Ribonuclease H1	RNH1_MOUSE	2	4231.94	3933.34	4459.24	2501.42	3857.27	4926.87	4842.1	3047.88
O70348	Decapping and exoribonuclease protein	Dxo	O70348	O70348;A0A0R4J288;G3UX82;G3UZ39;G3UZP8	Dxo	Decapping and exoribonuclease protein	DXO_MOUSE	11	11069.9	11609.2	9179.03	11843.4	10407.2	11917	11261.2	10525.8
O70362	Phosphatidylinositol-glycan-specific phospholipase D	Gpld1	O70362	O70362;Q8VCU2;Q7TNZ4;Q8R432;Q9DBH3	Gpld1	Phosphatidylinositol-glycan-specific phospholipase D	PHLD_MOUSE	14	30736.6	29484.1	28480.3	29578.3	30875.9	32912.2	31244.5	27571.1
O70370	Cathepsin S	Ctss	O70370	O70370;F6WR04;Q3UBR4;Q3UD32;Q8BSZ5;Q99M14	Ctss	Cathepsin S	CATS_MOUSE	10	57594.4	45696.7	52647.4	63223	309637	384665	379543	303148
O70378	ER membrane protein complex subunit 8	Emc8	O70378	O70378;Q3TPU5;M0QWC9;M0QWE2;M0QWI7;M0QWS0;Q3TTC9;Q8C988	Emc8	ER membrane protein complex subunit 8	EMC8_MOUSE	9	31480.3	29698.9	30549.2	32005.6	33658.9	29343.9	30951.3	32520.6
O70400	PDZ and LIM domain protein 1	Pdlim1	O70400	O70400;Q3TZ17;S4R1V0	Pdlim1	PDZ and LIM domain protein 1	PDLI1_MOUSE	8	79842.8	56316.7	52785.3	74934.9	72937	78464	74445.7	69316
O70404	Vesicle-associated membrane protein 8	Vamp8	O70404	O70404;A0A0R4J0R1;A0A0U1RPE8	Vamp8	Vesicle-associated membrane protein 8	VAMP8_MOUSE	7	29607.5	44667.9	40808.9	34817	40590.5	41910.8	38633.1	32564.2
O70421	Frizzled-1	Fzd1	O70421	O70421	Fzd1	Frizzled-1	FZD1_MOUSE	4	13353	10822.3	10804.3	11220.9	11769.7	15900.2	12612.4	13985.2
O70422	General transcription factor IIH subunit 4	Gtf2h4	O70422	O70422;Q3UEU9;Q542U3	Gtf2h4	General transcription factor IIH subunit 4	TF2H4_MOUSE	4	67491.6	57523.3	50076.5	47510	64728.2	67878.8	67798.3	69884.4
O70423	Amine oxidase [copper-containing] 3	Aoc3	O70423	O70423	Aoc3	Amine oxidase [copper-containing] 3	AOC3_MOUSE	14	43112.8	37141.5	35705	41062.4	40609.8	44854.4	40565.3	40619.6
O70433	Four and a half LIM domains protein 2	Fhl2	O70433	O70433;Q543D7	Fhl2	Four and a half LIM domains protein 2	FHL2_MOUSE	18	51919.4	51091.1	53708.2	54511.3	55331.5	53954.7	50571.6	52211.5
O70435	Proteasome subunit alpha type-3	Psma3	O70435	O70435;Q58EV4;Q9DCD8;E0CYL6;E0CZ34;F8WH02	Psma3	Proteasome subunit alpha type-3	PSA3_MOUSE	18	230945	236615	224697	243729	278159	271865	293972	271574
O70439	Syntaxin-7	Stx7	O70439	O70439;Q8BH40;Q9DCE1;Q9JMJ6	Stx7	Syntaxin-7	STX7_MOUSE	8	241845	226535	225579	226939	266098	273382	302616	275733
O70443	Guanine nucleotide-binding protein G(z) subunit alpha	Gnaz	O70443	O70443;Q3UYF9;Q542R8	Gnaz	Guanine nucleotide-binding protein G(z) subunit alpha	GNAZ_MOUSE	1	3560.09	2331.42	1737.46		1838.3	2442.98		1525.84
O70451	Monocarboxylate transporter 2	Slc16a7	O70451	O70451;Q149G3;Q149G4;Q4FK61;A0JNU2	Slc16a7	Monocarboxylate transporter 2	MOT2_MOUSE	1		1837.56	1382.57	947.979	956.598	420.497	1528.04	735.594
O70456	14-3-3 protein sigma	Sfn	O70456	O70456;Q9JJ20	Sfn	14-3-3 protein sigma	1433S_MOUSE	14	198561	135984	140610	146698	165373	158614	182837	156405
O70458	Oncostatin-M-specific receptor subunit beta	Osmr	O70458	O70458;A0A0R4J268;B9EHD2;G3X8V6	Osmr	Oncostatin-M-specific receptor subunit beta	OSMR_MOUSE	9	8313.13	6867.89	8273.28	7174.5	9050.47	8858.82	8262.71	10246.9
O70469	Docking protein 2	Dok2	O70469	O70469;Q3TX09;Q3U208	Dok2	Docking protein 2	DOK2_MOUSE	2	2801.69	2395.42	2240.82	1736.63	1901.07	1471.44	2164.07	2283.11
O70472	Transmembrane protein 131	Tmem131	O70472	O70472	Tmem131	Transmembrane protein 131	TM131_MOUSE	2		1974.14	1999.73	2599.61			3014.17
O70475	UDP-glucose 6-dehydrogenase	Ugdh	O70475	O70475;Q3TJ71;Q3TJE8;Q3TS38;Q3UIZ1;Q3TI06	Ugdh	UDP-glucose 6-dehydrogenase	UGDH_MOUSE	31	112469	109057	114826	110365	112279	114414	101838	98713.9
O70477	Homeobox protein PKNOX1	Pknox1	O70477;Q8BG99	O70477;Q8BG99;A0A494B958;A0A494B9U0;A0A494BA52;A0A494BB27;Q8BJF5;Q8BVV3	Pknox1;Pknox2	Homeobox protein PKNOX1	PKNX1_MOUSE;PKNX2_MOUSE	1	2847.62	5769.3	5187.23	3926.46	3395.08	3831.8	3741.29	3453.65
O70479	BTB/POZ domain-containing adapter for CUL3-mediated RhoA degradation protein 2	Tnfaip1	O70479	O70479	Tnfaip1	BTB/POZ domain-containing adapter for CUL3-mediated RhoA degradation protein 2	BACD2_MOUSE	2	3979.32	4100.27	4523.44	4295.36	4113.13	3424.23	3924.8	3512.63
O70480	Vesicle-associated membrane protein 4	Vamp4	O70480	O70480;Q8BSN6	Vamp4	Vesicle-associated membrane protein 4	VAMP4_MOUSE	1	2340.65	3158.4	3956.53	3096.33	2440.93	2546.42	3136.22	2519.5
O70481	E3 ubiquitin-protein ligase UBR1	Ubr1	O70481	O70481;Q2M4I1;Q3TKQ2;Q3V1R9;Q497M7	Ubr1	E3 ubiquitin-protein ligase UBR1	UBR1_MOUSE	22	12052.9	12958.8	12613.6	12142.9	10403.2	11475.7	10701.5	10321.5
O70491	Receptor for retinol uptake STRA6	Stra6	O70491	A0A0R4J115;O70491	Stra6	Receptor for retinol uptake STRA6	STRA6_MOUSE	4	19858.7	15612.8	20315	23320.2	8260.6	10180.1	11917.6	14838.9
O70492	Sorting nexin-3	Snx3	O70492	O70492;Q78ZM0;D3Z6Z0;Q9CSC2;Q9CU14	Snx3	Sorting nexin-3	SNX3_MOUSE	11	105347	83324.8	89333.5	97320.6	120113	105034	105220	103391
O70493	Sorting nexin-12	Snx12	O70493	O70493;Q3V2H3;Q3TGS7;Q6ZWQ5;Q99M52	Snx12	Sorting nexin-12	SNX12_MOUSE	12	48030.5	49411.9	45978.5	50533.5	52492.9	53048.7	54249.1	53577.2
O70496	H(+)/Cl(-) exchange transporter 7	Clcn7	O70496	O70496;E9PYL4;F6SUM2;Q6RUT9;Q8CCI9	Clcn7	H(+)/Cl(-) exchange transporter 7	CLCN7_MOUSE	5	8810.06	6431.5	7844.2	8642.83	9383.8	12705	12418.3	11746.1
O70503	Very-long-chain 3-oxoacyl-CoA reductase	Hsd17b12	O70503	O70503;Q0VGQ1;Q9CSR6	Hsd17b12	Very-long-chain 3-oxoacyl-CoA reductase	DHB12_MOUSE	10	67973.4	62462.6	78042.2	67796.1	63945.8	66813.6	66905.7	69649.4
O70546	Lysine-specific demethylase 6A	Kdm6a	O70546	O70546;A0A286YD05;Q3TPN3;Q3TRP6;Q8R2W5	Kdm6a	Lysine-specific demethylase 6A	KDM6A_MOUSE	1	34897.6	42829.8	38332.7	34774.1	40826.6	32209.6	34000.3	35663.6
O70551	SRSF protein kinase 1	Srpk1	O70551	O70551;Q3UB06;A0A3B2W430;A0A3B2W4B9;F8WGJ7;Q3TTF9;Q3TTI6;Q3URR1	Srpk1	SRSF protein kinase 1	SRPK1_MOUSE	9	22096	19533	22305.3	22059.6	20966.5	19487.4	18244.8	18799.5
O70557	Small proline-rich protein 2F	Sprr2f	O70557	O70554;O70557;O70558;A9JTY7	Sprr2f	Small proline-rich protein 2F	SPR2F_MOUSE	3	18811.2	10289.3	15381.8	18259.4	45312.2	43086.4	29126.1	32368.9
O70566	Protein diaphanous homolog 2	Diaph2	O70566	O70566;K4PWM5;Q3U4Y4;Q6W4W7;Q8C414	Diaph2	Protein diaphanous homolog 2	DIAP2_MOUSE	16	14041.5	13706.3	14035.9	15315.6	17633.8	15866.1	16708.2	13771.4
O70570	Polymeric immunoglobulin receptor	Pigr	O70570	O70570;D3YVM4;D3Z2D3;Q8R544	Pigr	Polymeric immunoglobulin receptor	PIGR_MOUSE	15	28095.1	25979.8	25698.1	30678.7	20897.1	25770.2	26515.9	27381.4
O70572	Sphingomyelin phosphodiesterase 2	Smpd2	O70572	O70572;Q8C6H6	Smpd2	Sphingomyelin phosphodiesterase 2	NSMA_MOUSE	14	26928.3	27300	31064.7	31185.7	29085	32247.9	27211.5	30100.8
O70577	Solute carrier family 22 member 2	Slc22a2	O70577	O70577	Slc22a2	Solute carrier family 22 member 2	S22A2_MOUSE	5	36886.7	46220.7	48029.8	37684.2	25759.8	21068.2	25144.8	23571.4
O70579	Peroxisomal membrane protein PMP34	Slc25a17	O70579	O70579;A0A2R8VI88	Slc25a17	Peroxisomal membrane protein PMP34	PM34_MOUSE	7	60806.7	51880.8	58794.5	59099.7	43831.5	48368.2	44123.6	36727.7
O70583	E3 ubiquitin-protein ligase Midline-1	Mid1	O70583	O70583;B1AUZ9;B1AV01;Q3TVH5;Q6PD02	Mid1	E3 ubiquitin-protein ligase Midline-1	TRI18_MOUSE	6	12904.7	13620.8	13716.9	15586.9	14468.3	13608.3	12951.4	13391.8
O70585	Dystrobrevin beta	Dtnb	O70585	O70585;G3UXK0;G3UY34;G3UYM7;G3UZ87;G3UZJ3;Q8C8Z9;Q8K0N0;G3UXI3;Q8BNG4	Dtnb	Dystrobrevin beta	DTNB_MOUSE	11	14058.6	13505.1	12932.5	14637.5	10425.9	9902.14	11854.6	12273.7
O70589	Peripheral plasma membrane protein CASK	Cask	O70589	O70589;A0A067XG53;B1AUH5;B7ZP42;B9EJ23	Cask	Peripheral plasma membrane protein CASK	CSKP_MOUSE	37	77999	103219	85997.5	81167.7	73751	70580.5	79972.9	80734.7
O70591	Prefoldin subunit 2	Pfdn2	O70591	O70591;F8WJ30	Pfdn2	Prefoldin subunit 2	PFD2_MOUSE	8	69462.9	65949	67303.7	66721.5	68029.4	65470.7	65091.1	70091.1
O70622	Reticulon-2	Rtn2	O70622	O70622;Q3TUZ6;Q6IM74;Q6IM75	Rtn2	Reticulon-2	RTN2_MOUSE	1	2313.13	2244.98	2166.17	2231.72	889.673	2674.86	1823.47	1314.53
O88186	Platelet glycoprotein IX	Gp9	O88186	O88186	Gp9	Platelet glycoprotein IX	GPIX_MOUSE	2	2701.73	3251.24	3755.01	2738.03		1810.01	1805.17	2672.45
O88188	Lymphocyte antigen 86	Ly86	O88188	O88188	Ly86	Lymphocyte antigen 86	LY86_MOUSE	2	17498.9	13738.6	20679.5	22065.9	24193.3	30551.4	24349.3	26713.9
O88200	C-type lectin domain family 11 member A	Clec11a	O88200	O88200	Clec11a	C-type lectin domain family 11 member A	CLC11_MOUSE	4	7987.11	8309.39	9154.21	9866.25	7881.61	9102.51	7945.93	6863.88
O88207	Collagen alpha-1(V) chain	Col5a1	O88207	O88207;B1AWB9	Col5a1	Collagen alpha-1(V) chain	CO5A1_MOUSE	6	62874.3	52756.3	48589.2	47433.8	82501.8	74032.9	67949.4	74012.6
O88271	Craniofacial development protein 1	Cfdp1	O88271	O88271	Cfdp1	Craniofacial development protein 1	CFDP1_MOUSE	4	11646.5	9577.99	13368.7	10385.4	18036.6	15735.5	14806	14202.8
O88291	DBIRD complex subunit ZNF326	Znf326	O88291	O88291;A0A0R4J098;D3YXQ7	Znf326	DBIRD complex subunit ZNF326	ZN326_MOUSE	8	5577.5	4957.15	4614.05	4936.51	4262.74	4324.03	4268.07	4846.62
O88307	Sortilin-related receptor	Sorl1	O88307	O88307;Q3U2X9	Sorl1	Sortilin-related receptor	SORL_MOUSE	43	41228.3	42143.5	39788.9	35622	47133.3	52607.7	52582.9	55583.3
O88322	Nidogen-2	Nid2	O88322	O88322;A0A286YCQ5;Q3TPN0;Q3US45;Q8C6Z2;Q8CFA3;Q8R5G0	Nid2	Nidogen-2	NID2_MOUSE	39	234109	239128	232248	243785	241035	258348	241250	252700
O88327	Alpha-catulin	Ctnnal1	O88327	O88327	Ctnnal1	Alpha-catulin	CTNL1_MOUSE	8	10044.5	10047.6	8958.3	11350.1	9218.44	9899.78	10285.3	10988
O88335	ATP-sensitive inward rectifier potassium channel 1	Kcnj1	O88335	O88335;G3UWE7	Kcnj1	ATP-sensitive inward rectifier potassium channel 1	KCNJ1_MOUSE	2	6024.85	9846.31	6400.72	7900.56	4654.92	6989.7	7199.92	7290.16
O88338	Cadherin-16	Cdh16	O88338	O88338;A8C1V6;Q3TPA4;Q546A8;Q8C730	Cdh16	Cadherin-16	CAD16_MOUSE	14	306346	517159	436907	377598	283662	264970	290188	301698
O88342	WD repeat-containing protein 1	Wdr1	O88342	O88342;Q3TJY2;A0A0J9YU05;Q3TE06;Q3TNK2;Q3U136;Q80ZI9;Q9DBM8;Q9DC08	Wdr1	WD repeat-containing protein 1	WDR1_MOUSE	36	398253	361603	405554	423021	418916	448409	438849	423033
O88343	Electrogenic sodium bicarbonate cotransporter 1	Slc4a4	O88343	E9Q3M5;O88343;A0A668KM61;A2VDF7;A7E1Z5;E1AWU4;E3VWA1;E9Q8N8;D3YVG0;D3YX36;D3Z7G8	Slc4a4	Electrogenic sodium bicarbonate cotransporter 1	S4A4_MOUSE	27	267662	484065	390249	330370	312678	304559	328271	327743
O88351	Inhibitor of nuclear factor kappa-B kinase subunit beta	Ikbkb	O88351	O88351;Q5D0E0;A0A0R4J0T4;Q05DR8;Q3U141;Q3USX8;Q3V454;F6ULQ4	Ikbkb	Inhibitor of nuclear factor kappa-B kinase subunit beta	IKKB_MOUSE	18	22435.3	20879.9	21245.4	23358.3	20394.9	19802.6	18239.7	20675.1
O88379	Bromodomain adjacent to zinc finger domain protein 1A	Baz1a	O88379	O88379;G3UWZ0	Baz1a	Bromodomain adjacent to zinc finger domain protein 1A	BAZ1A_MOUSE	2	2308.88	1811.1	3203.7	2341.57	3646.03	3145.98	2115.44
O88384	Vesicle transport through interaction with t-SNAREs homolog 1B	Vti1b	O88384	O88384;Q91XH6;Q3TUP8;Q9Z2P7;F6UHS3	Vti1b	Vesicle transport through interaction with t-SNAREs homolog 1B	VTI1B_MOUSE	8	27868.7	23747.8	27309.7	27070.1	36335.7	37772.6	35912.9	34553.4
O88393	Transforming growth factor beta receptor type 3	Tgfbr3	O88393	O88393;A0A0R4J097	Tgfbr3	Transforming growth factor beta receptor type 3	TGBR3_MOUSE	4	6372.77	6883.34	6469.85	6329.74	6530.33	8954.98	7400.32	9577.55
O88396	GrpE protein homolog 2, mitochondrial	Grpel2	O88396	O88396;Q0VB85;Q3UYQ9	Grpel2	GrpE protein homolog 2, mitochondrial	GRPE2_MOUSE	2	2270.41	1792.98	2371.51	1716.37	2044.7	2124.61	1650.69	1913.14
O88413	Tubby-related protein 3	Tulp3	O88413	O88413	Tulp3	Tubby-related protein 3	TULP3_MOUSE	5	8004.3	10064.7	9780.27	7756.88	10115.4	8663.56	7209.82	8343.54
O88428	Bifunctional 3'-phosphoadenosine 5'-phosphosulfate synthase 2	Papss2	O88428	O88428;A0A494B923;A0A494BB18;Q9QYS0	Papss2	Bifunctional 3'-phosphoadenosine 5'-phosphosulfate synthase 2	PAPS2_MOUSE	41	50571.1	80718.6	62136.6	55005.7	50199.5	51582.8	53662.3	52525.8
O88441	Metaxin-2	Mtx2	O88441	O88441;Q3TI19;Q3TI40;Q8C454	Mtx2	Metaxin-2	MTX2_MOUSE	9	75895.6	87413.5	73818.9	65909.3	71031.6	71322.4	73413.9	73015.5
O88447	Kinesin light chain 1	Klc1	O88447	O88447;A0A5F8MPZ2;E9Q7C9;Q5UE59;Q7M6Z6;Q7M6Z7;Q7M6Z8;Q7M6Z9;Q7M700;Q7M701;Q7M702;Q7M703;Q7TNF4;Q8CD76	Klc1	Kinesin light chain 1	KLC1_MOUSE	10	12252	10890.5	11580.4	13237.4	11285.2	10849.7	10121.7	10966
O88448	Kinesin light chain 2	Klc2	O88448	O88448;Q91YS4;D3YXZ3	Klc2	Kinesin light chain 2	KLC2_MOUSE	8	12309.6	10291	10336.2	13589.8	10897.5	10642.6	10056.9	8987.02
O88451	Retinol dehydrogenase 7	Rdh7	O88451	O88451	Rdh7	Retinol dehydrogenase 7	RDH7_MOUSE	1	7461.91	11229.7	8289.83	5500.42	6270.09	8391.98	7616.96	9554.02
O88455	7-dehydrocholesterol reductase	Dhcr7	O88455	O88455;A0A140LIT2;Q3UIQ5;Q4FJX5	Dhcr7	7-dehydrocholesterol reductase	DHCR7_MOUSE	3	11613.4	12061.3	11406.4	11820.6	13192.1	14974.9	9389.52	8883.37
O88456	Calpain small subunit 1	Capns1	O88456	O88456;Q9D7J7;A0A0R4J1C2	Capns1	Calpain small subunit 1	CPNS1_MOUSE	10	117648	99631.5	97397.6	107624	115343	110651	104509	99353.1
O88487	Cytoplasmic dynein 1 intermediate chain 2	Dync1i2	O88487	O88487;A2BFF5;A2BFF7;A2BFF8;A2BFF9;D6Q0F5;D6Q0F6;D6Q0F7;Q3TPJ8;Q3UDA2	Dync1i2	Cytoplasmic dynein 1 intermediate chain 2	DC1I2_MOUSE	12	93127.2	83678.3	89436.1	94707.6	93931.7	84526.9	96914.2	86032.9
O88491	Histone-lysine N-methyltransferase, H3 lysine-36 specific	Nsd1	O88491	O88491;A0A286YE36;E9QAE4	Nsd1	Histone-lysine N-methyltransferase, H3 lysine-36 specific	NSD1_MOUSE	2	4069.03	2944.69	2982.31	2601.6	3539.08	4776.95	4248.46	3229.83
O88502	High affinity cAMP-specific and IBMX-insensitive 3',5'-cyclic phosphodiesterase 8A	Pde8a	O88502	O88502;Q3UFX9;Q3UEE9	Pde8a	High affinity cAMP-specific and IBMX-insensitive 3',5'-cyclic phosphodiesterase 8A	PDE8A_MOUSE	4	6672.61	9726.02	7493.22	5921.24	7138.95	5959.07	7646.73	7282.3
O88507	Ciliary neurotrophic factor receptor subunit alpha	Cntfr	O88507	O88507;C9K0Z6;Q3UVR2;Q9D586	Cntfr	Ciliary neurotrophic factor receptor subunit alpha	CNTFR_MOUSE	2	1569.85	2039.88		1718.76	2094.48	1612.55	2171.35	1594.1
O88508	DNA (cytosine-5)-methyltransferase 3A	Dnmt3a	O88508	O88508	Dnmt3a	DNA (cytosine-5)-methyltransferase 3A	DNM3A_MOUSE	6	8317.09	8183.25	11847.9	11859.8	11281.8	11582	11075.4	9551.48
O88512	AP-1 complex subunit gamma-like 2	Ap1g2	O88512	O88512;Q3U9D1;Q3UHW6	Ap1g2	AP-1 complex subunit gamma-like 2	AP1G2_MOUSE	10	9014.9	7981.92	7970.94	8781.57	8701.17	10594.5	9055.73	9418.35
O88520	Leucine-rich repeat protein SHOC-2	Shoc2	O88520	O88520;A0A494BAG1;Q8R378	Shoc2	Leucine-rich repeat protein SHOC-2	SHOC2_MOUSE	5	6223.4	6147.75	6218.17	6343.22	5364.02	5058.83	4697.19	5062.68
O88522	NF-kappa-B essential modulator	Ikbkg	O88522	O88522;Q7TSS3;E9Q2Y3;Q8VC91;A3KG38;A3KG40;A3KG41;A3KG44;Q3UG24	Ikbkg	NF-kappa-B essential modulator	NEMO_MOUSE	7	12844.6	11903.5	13845.8	11897	13867.8	14785.5	12818.9	13660.8
O88531	Palmitoyl-protein thioesterase 1	Ppt1	O88531	O88531;Q3U6J9;B1B0P8;B1B0P9;Q3TAR8;Q3TEL0;Q3U6W3;Q3UB92;Q3UFT5;Q8VBX5	Ppt1	Palmitoyl-protein thioesterase 1	PPT1_MOUSE	11	159595	164279	158755	176970	143109	145342	146264	153804
O88532	Zinc finger RNA-binding protein	Zfr	O88532	O88532;B2RUG7	Zfr	Zinc finger RNA-binding protein	ZFR_MOUSE	18	29098.4	26999.1	23974.9	26364.1	27169.1	27172.4	27565.3	27355.3
O88533	Aromatic-L-amino-acid decarboxylase	Ddc	O88533	O88533;Q5SUV8	Ddc	Aromatic-L-amino-acid decarboxylase	DDC_MOUSE	15	20932.7	38932.5	25990	17024.9	17804.4	17185.8	20087.2	20854.3
O88536	Formyl peptide receptor 2	Fpr2	O88536	O88536	Fpr2	Formyl peptide receptor 2	FPR2_MOUSE	2	6908.44	6649.91	7671.8	7794.97	6699.42	5219.93	4850.76	8764.03
O88543	COP9 signalosome complex subunit 3	Cops3	O88543	O88543;Q3UQL2;F6YCA7;Q8BX58	Cops3	COP9 signalosome complex subunit 3	CSN3_MOUSE	16	52131.7	52637.1	51366.3	51662.9	52602.4	53067.6	54936.4	55354.4
O88544	COP9 signalosome complex subunit 4	Cops4	O88544	O88544;Q14AI7;Q3TIJ1;D3YV99;D3Z1R9;F6QTS1	Cops4	COP9 signalosome complex subunit 4	CSN4_MOUSE	30	48424.1	44364.8	44242.2	43525.7	44930.3	45175.8	42885.5	43785.9
O88545	COP9 signalosome complex subunit 6	Cops6	O88545	O88545;D3Z0F5;Q3UIT2;F6QK86	Cops6	COP9 signalosome complex subunit 6	CSN6_MOUSE	15	47344.5	46692.5	52573.9	45765.6	46882	56849.3	51996.2	57215.2
O88551	Claudin-1	Cldn1	O88551	O88551;Q4FJV3;A7UKX1	Cldn1	Claudin-1	CLD1_MOUSE	1	7020.91	8677.81	7557.23	6726.77	6485.6	7609.45	8224.61	9257.91
O88552	Claudin-2	Cldn2	O88552	O88552	Cldn2	Claudin-2	CLD2_MOUSE	2	4491.84	3992.37	5030.79	2935.98	4596.5	6849.21	7439.2	6009.28
O88554	Poly [ADP-ribose] polymerase 2	Parp2	O88554	O88554	Parp2	Poly [ADP-ribose] polymerase 2	PARP2_MOUSE	3	4416.72	3721.4	2831.57	3630.33	2784.88	3402.12	2152.73	2831.59
O88559	Menin	Men1	O88559	O88559;A0A0R4J1I3;D3YZC2;F8WHD9	Men1	Menin	MEN1_MOUSE	1	2643.97	1107.54	1163.47	736.625	1549.33	1122.96	1401.95	1692.63
O88561	Long-chain fatty acid transport protein 3	Slc27a3	O88561	O88561;G3X8Y7;B2RUG3;Q2UZQ7;Q6KAQ1	Slc27a3	Long-chain fatty acid transport protein 3	S27A3_MOUSE	3	3951.54	4054.74	4076.85	5075.57	4823.48	2896.17	3586.38	3972.93
O88569	Heterogeneous nuclear ribonucleoproteins A2/B1	Hnrnpa2b1	O88569	O88569;B7ZP22;A0A0N4SUM2	Hnrnpa2b1	Heterogeneous nuclear ribonucleoproteins A2/B1	ROA2_MOUSE	29	804822	685854	715161	754020	781362	758346	821323	774382
O88574	Histone deacetylase complex subunit SAP30	Sap30	O88574	O88574	Sap30	Histone deacetylase complex subunit SAP30	SAP30_MOUSE	1	2863.6	1703.06	1346.86	3478.31	4103.35	2179.68	1834.12	1880.23
O88575	Sodium- and chloride-dependent transporter XTRP3B	Slc6a20b	O88575	Q8VDB9;O88575;A0A803YV45;E9Q0H0;Q8C604	Slc6a20b	Sodium- and chloride-dependent transporter XTRP3B	S620B_MOUSE	4	20648.3	26651.2	26936.8	22522.9	14754.2	13439.4	15957.7	13715
O88576	Sodium-dependent neutral amino acid transporter B(0)AT3	Slc6a18	O88576	O88576;A0A217FL56	Slc6a18	Sodium-dependent neutral amino acid transporter B(0)AT3	S6A18_MOUSE	4	18119.2	24564.7	17736.2	18502.4	15821.8	12571.9	15305.1	11166.2
O88587	Catechol O-methyltransferase	Comt	O88587	O88587	Comt	Catechol O-methyltransferase	COMT_MOUSE	15	257611	248878	245880	231906	284563	259776	273711	276956
O88593	Peptidoglycan recognition protein 1	Pglyrp1	O88593	O88593;Q4FK86	Pglyrp1	Peptidoglycan recognition protein 1	PGRP1_MOUSE	2	21193.9	16312.5	20473.9	23154	32339.2	29664.6	24078.4	48224.6
O88597	Beclin-1	Becn1	O88597	O88597;F7C090;E9PYD6	Becn1	Beclin-1	BECN1_MOUSE	4	4973.34	5154.95	3846.49	5504.72	4329.71	4096.03	5038.39	4529.1
O88622	Poly(ADP-ribose) glycohydrolase	Parg	O88622	O88622;A5YBK2;E9Q088;G3X8U8;A0A2I3BRU5;E9Q7T9;Q3TUI8	Parg	Poly(ADP-ribose) glycohydrolase	PARG_MOUSE	9	8031.52	6721.26	6085.63	6337.02	8105.82	6820.92	7075.76	7337.46
O88623	Ubiquitin carboxyl-terminal hydrolase 2	Usp2	O88623	O88623	Usp2	Ubiquitin carboxyl-terminal hydrolase 2	UBP2_MOUSE	10	5641.52	7045.33	6667.14	6137.52	6026.57	5698.51	5759.37	5947.97
O88630	Golgi SNAP receptor complex member 1	Gosr1	O88630	O88630;Q80UU0	Gosr1	Golgi SNAP receptor complex member 1	GOSR1_MOUSE	5	14428.1	14585.6	15914.1	17070.1	14122.6	11884.7	11783.1	15030.2
O88643	Serine/threonine-protein kinase PAK 1	Pak1	O88643	O88643;G5E884	Pak1	Serine/threonine-protein kinase PAK 1	PAK1_MOUSE	5	12185.2	9925.73	9318.71	12381	13939.3	11044.5	10953.3	9930.51
O88653	Ragulator complex protein LAMTOR3	Lamtor3	O88653	O88653;A0A0G2JGQ3;Q3TX23;Q542I7	Lamtor3	Ragulator complex protein LAMTOR3	LTOR3_MOUSE	6	15826.8	19989.8	17628.5	15861.5	19064.4	21718.7	21301.4	20121.5
O88665	Bromodomain-containing protein 7	Brd7	O88665	O88665;A0AA74KT86	Brd7	Bromodomain-containing protein 7	BRD7_MOUSE	4	3913.49	5173.49	5160.56	5859.43	4890.99	4115.84	4798.82	3466.5
O88667	GTP-binding protein RAD	Rrad	O88667	O88667;Q6PGA2	Rrad	GTP-binding protein RAD	RAD_MOUSE	1		3293.64	4043.85	3900.21	4266.34	3008.29	3410.22	3973.36
O88668	Protein CREG1	Creg1	O88668	O88668;K4DI63	Creg1	Protein CREG1	CREG1_MOUSE	4	8887.94	8389.6	7351.04	8894.59	24816.1	35698.4	43662.5	34062.8
O88673	Diacylglycerol kinase alpha	Dgka	O88673	O88673;R4I4W1;R4I3X7	Dgka	Diacylglycerol kinase alpha	DGKA_MOUSE	2	2145.37	1427.83	2294.4	1808.87	1765.38	2031.93	1712.67
O88685	26S proteasome regulatory subunit 6A	Psmc3	O88685	O88685;B7ZCF1;Q3THI5;Q3TKC2;Q3TKG4;Q3U8Y7;Q3UD94;Q8BUP7;A0A087WPH7;F6Q2E3	Psmc3	26S proteasome regulatory subunit 6A	PRS6A_MOUSE	33	229284	224678	217181	226637	248171	241777	240742	233660
O88693	Ceramide glucosyltransferase	Ugcg	O88693	O88693	Ugcg	Ceramide glucosyltransferase	CEGT_MOUSE	2	3786.74		1817.98	1986.05	2486.65	1802.84	2546.94	2814.35
O88696	ATP-dependent Clp protease proteolytic subunit, mitochondrial	Clpp	O88696	O88696;Q3UGW4;Q8CF81	Clpp	ATP-dependent Clp protease proteolytic subunit, mitochondrial	CLPP_MOUSE	12	54519.9	76818.4	66479.2	58009.3	56604.7	51785.5	56063.1	56801.1
O88697	Serine/threonine-protein kinase 16	Stk16	O88697	O88697;A0A087WQ12;A0A087WQT0;Q8BSV9;Q8CCS9	Stk16	Serine/threonine-protein kinase 16	STK16_MOUSE	5	10545.4	8632.63	8462.14	10224.1	8133.99	6937.64	8279.57	5817.38
O88705	Potassium/sodium hyperpolarization-activated cyclic nucleotide-gated channel 3	Hcn3	O88705	O88705;B2RRB5	Hcn3	Potassium/sodium hyperpolarization-activated cyclic nucleotide-gated channel 3	HCN3_MOUSE	1	3016.86	2458.03	9007.74	6797.94	18730.4	14821.7	16252.5	10300.2
O88708	Origin recognition complex subunit 4	Orc4	O88708	O88708;Q8BN98;Q8BTB0;Q8C693	Orc4	Origin recognition complex subunit 4	ORC4_MOUSE	1	4385.29	4010.53	5379.6	5110.58
O88712	C-terminal-binding protein 1	Ctbp1	O88712	O88712;P56546;Q3UGL5;Q3UIX8;Q91YZ2;A0A0J9YTW3;A0A0J9YU62;A0A0J9YUM4;E9PWQ9;E9Q0T4	Ctbp1	C-terminal-binding protein 1	CTBP1_MOUSE	12	54297.4	53997.3	50399.7	53087.6	49455.1	43911.2	50667.8	50361.7
O88720	RNA binding protein	Rbm6	O88720;Q3ULB0;Q5DTS4;S4R1W5	O88720;Q3ULB0;Q5DTS4;S4R1W5	Rbm6	RNA binding protein	O88720_MOUSE;Q3ULB0_MOUSE;Q5DTS4_MOUSE;S4R1W5_MOUSE	7	4497.44	4015.87	4904.84	4625.37	4846.54	4444.9	5172.99	4711.05
O88735	Ensconsin	Map7	O88735	O88735;D3YWN7;E9QMU3	Map7	Ensconsin	MAP7_MOUSE	5	33002.5	38099	37419	34247.3	36193	39389.3	36160.9	33122.7
O88736	3-keto-steroid reductase/17-beta-hydroxysteroid dehydrogenase 7	Hsd17b7	O88736	O88736;Q8C5N9	Hsd17b7	3-keto-steroid reductase/17-beta-hydroxysteroid dehydrogenase 7	DHB7_MOUSE	5	13005.2	10717.4	15160	13971.8	13424.1	12840.2	13088.1	10492.8
O88738	Dual E2 ubiquitin-conjugating enzyme/E3 ubiquitin-protein ligase BIRC6	Birc6	O88738	O88738;A0A1S6GWH3;A0A1S6GWH6;J3QP64;Q3UYZ6;Q8CBU9;S4R1L5;S4R1R8;S4R2N7;S4R2P8	Birc6	Dual E2 ubiquitin-conjugating enzyme/E3 ubiquitin-protein ligase BIRC6	BIRC6_MOUSE	45	16482	15347.7	17069.1	16730.2	16858.3	16290.4	15694.6	15225.6
O88746	Target of Myb1 membrane trafficking protein	Tom1	O88746	O88746;Q3UDC3;Q561M4	Tom1	Target of Myb1 membrane trafficking protein	TOM1_MOUSE	7	21083.6	20160.8	19670.7	22039.4	23632.6	23654.4	27393.2	25875.4
O88783	Coagulation factor V	F5	O88783	O88783	F5	Coagulation factor V	FA5_MOUSE	2	1327.05	2622.35	1968.12	1731.31	2201	3088.54	1870.24	2074.1
O88792	Junctional adhesion molecule A	F11r	O88792	O88792	F11r	Junctional adhesion molecule A	JAM1_MOUSE	5	37494.1	40285.3	33943.6	33249.2	57686.6	59651.1	62164	64487.2
O88796	Ribonuclease P protein subunit p30	Rpp30	O88796	O88796;Q3TF81;Q6P6M0;Q8K238	Rpp30	Ribonuclease P protein subunit p30	RPP30_MOUSE	5	16788.8	18306.5	19277.7	17832.5	20366	17598.3	16623.7	21013.4
O88803	Leukocyte cell-derived chemotaxin-2	Lect2	O88803	O88803;A0A0R4J0R8;A0A286YE52	Lect2	Leukocyte cell-derived chemotaxin-2	LECT2_MOUSE	3	2360.89	1422.27	3729.67	2707.76	5649.59	3947.01	3256.34	3343.91
O88811	Signal transducing adapter molecule 2	Stam2	O88811	O88811;Q3TGH8	Stam2	Signal transducing adapter molecule 2	STAM2_MOUSE	6	7955.55	8260.72	7270.1	8639.86	9461.51	8893.25	9340.13	8680.62
O88819	4-galactosyl-N-acetylglucosaminide 3-alpha-L-fucosyltransferase 9	Fut9	O88819	O88819;Q14AE3	Fut9	4-galactosyl-N-acetylglucosaminide 3-alpha-L-fucosyltransferase 9	FUT9_MOUSE	6	8848.53	10347	9041.08	6524.91	9884.9	7898.26	7513.45	7167.18
O88824	Protein JTB	Jtb	O88824	O88824;Q542D4;D3Z4D1;Q3UJR4	Jtb	Protein JTB	JTB_MOUSE	1	6506.63	3233.29	6525.42	6411.19	3415.91	3206.39	3764.29	2468.8
O88833	Cytochrome P450 4A10	Cyp4a10	O88833	O88833;A2A977	Cyp4a10	Cytochrome P450 4A10	CP4AA_MOUSE	8	6588.9	18659.5	11315.1	9852.57	7778.72	8886.92	10792.5	8421.54
O88838	SPRY domain-containing SOCS box protein 2	Spsb2	O88838	O88838;D3YX10;D3Z7N7	Spsb2	SPRY domain-containing SOCS box protein 2	SPSB2_MOUSE	1	3730.14		3544.5	3714.14	2157.81		1584.65	2284.31
O88839	Disintegrin and metalloproteinase domain-containing protein 15	Adam15	O88839	O88839;Q8CA82;Q3TD57	Adam15	Disintegrin and metalloproteinase domain-containing protein 15	ADA15_MOUSE	3	7613.82	5069.06	8104.69	6137.15	8052.9	6808.29	6258.77	6803.72
O88842	FYVE, RhoGEF and PH domain-containing protein 3	Fgd3	O88842	O88842;A0A0R4J1D9;Q3TNB8	Fgd3	FYVE, RhoGEF and PH domain-containing protein 3	FGD3_MOUSE	2	2836.42	2462.77	2598.74	3627.69	2688.78	2607.65	2254.19	2315.51
O88844	Isocitrate dehydrogenase [NADP] cytoplasmic	Idh1	O88844	O88844;Q0QER9;Q3TJ51;Q5HZJ8;Q8C338;A0A087WPT4;A0A087WRS9	Idh1	Isocitrate dehydrogenase [NADP] cytoplasmic	IDHC_MOUSE	42	1247210	1444480	1379170	1348410	1297340	1172810	1175370	1147830
O88845	A-kinase anchor protein 10, mitochondrial	Akap10	O88845	O88845	Akap10	A-kinase anchor protein 10, mitochondrial	AKA10_MOUSE	7	9340.86	8537.84	8093.9	7729.86	10069.4	7951.63	8710.57	8120.86
O88848	ADP-ribosylation factor-like protein 6	Arl6	O88848	O88848;D3Z067;Q3TUM2;Q3U6U3;Q8VCV3	Arl6	ADP-ribosylation factor-like protein 6	ARL6_MOUSE	4	8302.4	8390.09	10003.3	7912.94	6826.3	6520.41	7593.73	7367.01
O88851	Putative hydrolase RBBP9	Rbbp9	O88851	O88851;A2AN96;Q80YU9	Rbbp9	Putative hydrolase RBBP9	RBBP9_MOUSE	12	128605	140339	131234	119771	132397	134277	149803	135012
O88856	Protein-tyrosine sulfotransferase 2	Tpst2	O88856	O88856;A0A0G2JE92;Q3TQN1	Tpst2	Protein-tyrosine sulfotransferase 2	TPST2_MOUSE	3	8872.41	9016.6	10573.7	14620.1	13024.6	10194.7	9825.53	8536.81
O88874	Cyclin-K	Ccnk	O88874	O88874;Q3U3H2;Q3U3M5	Ccnk	Cyclin-K	CCNK_MOUSE	3	3035.78	4697.14	3383.7	4845.52	3660.45	4906.76	6168.45	4219.41
O88876	Short-chain dehydrogenase/reductase 3	Dhrs3	O88876	O88876;B1ARS9;G5E8W9	Dhrs3	Short-chain dehydrogenase/reductase 3	DHRS3_MOUSE	6	11129.3	12295.3	15504.6	13169.7	10810.4	11407.1	10948.5	12891.8
O88878	AN1-type zinc finger protein 5	Zfand5	O88878	O88878	Zfand5	AN1-type zinc finger protein 5	ZFAN5_MOUSE	3	4854.99	4549.35	3466.01	4081.16	4587.36	4505.06	6052.75	5194.74
O88879	Apoptotic protease-activating factor 1	Apaf1	O88879	O88879;G3XA09;Q5DU30	Apaf1	Apoptotic protease-activating factor 1	APAF_MOUSE	10	9597.14	5871.98	9054.98	11775.8	9595.7	8200.8	10159	9924.76
O88888	Amyloid-beta A4 precursor protein-binding family A member 3	Apba3	O88888	O88888;A0A1W2P6Z9;Q3TER1;Q8BNM8	Apba3	Amyloid-beta A4 precursor protein-binding family A member 3	APBA3_MOUSE	2	6501.47	6130.93	5978.73	7393.49	6576.2	6130.63	7878.58	6456.15
O88895	Histone deacetylase 3	Hdac3	O88895	O88895;Q9JLX5;Q9JM08	Hdac3	Histone deacetylase 3	HDAC3_MOUSE	7	7194.42	6784.5	8415.26	7593.25	8327.43	9072.12	7913.34	8521.59
O88907	E3 SUMO-protein ligase PIAS1	Pias1	O88907	O88907;Q8C5D8;Q2M4G9;F8WHS8;G3UWE3;Q3U556	Pias1	E3 SUMO-protein ligase PIAS1	PIAS1_MOUSE	1	5749.23	4772.31	6555.52	4625.07	4438.49	4860.51	3325.3	4723.68
O88909	Organic anion transporter 3	Slc22a8	O88909	O88909	Slc22a8	Organic anion transporter 3	S22A8_MOUSE	8	13955.6	32696.1	23265.7	15781.2	5853.86	8514.68	9631.99	9050.91
O88932	ATP-sensitive inward rectifier potassium channel 15	Kcnj15	O88932	O88932;Q3TR79;Q3UQ02;Q53Z04;B7ZNJ9;Q3TNE6	Kcnj15	ATP-sensitive inward rectifier potassium channel 15	KCJ15_MOUSE	4	4113.98	5849.37	4234.54	4393.01	6260.02	6265.52	5056.1	6722.53
O88935	Synapsin-1	Syn1	O88935	O88935	Syn1	Synapsin-1	SYN1_MOUSE	4	5297.22	4053.98	3414.79	2507.27	4364.9	3821.53	3042.43	24813.4
O88942	Nuclear factor of activated T-cells, cytoplasmic 1	Nfatc1	O88942	O88942;B5B2N2;B5B2N4;B5B2N5;B5B2N7;Q3UME0;Q6P7T9;Q9DBQ6;Q9JHD3	Nfatc1	Nuclear factor of activated T-cells, cytoplasmic 1	NFAC1_MOUSE	2	3458.83	2625.9	2885.49	3243.17	2235.16	3446.74	1440.48	3977.37
O88947	Coagulation factor X	F10	O88947	O88947;Q3TBR2;Q3U3V1;Q4FJS7;Q3TDB9	F10	Coagulation factor X	FA10_MOUSE	10	11553.3	9631.07	13010.6	16238.2	12047.1	9921.68	11230.4	11856.5
O88952	Protein lin-7 homolog C	Lin7c	O88952	O88952;Q3TTY6;Q3UX93	Lin7c	Protein lin-7 homolog C	LIN7C_MOUSE	11	156830	189265	163793	155517	150692	149025	154197	150694
O88958	Glucosamine-6-phosphate isomerase 1	Gnpda1	O88958	O88958;A0A494B9X2;A0A494BB68;D3Z0R5;Q6A0D9	Gnpda1	Glucosamine-6-phosphate isomerase 1	GNPI1_MOUSE	17	34082.1	33285.8	38432.6	32033.9	37135	35747.6	34043.2	34659.7
O88967	ATP-dependent zinc metalloprotease YME1L1	Yme1l1	O88967	O88967	Yme1l1	ATP-dependent zinc metalloprotease YME1L1	YMEL1_MOUSE	18	51579.9	60172.4	57688.4	62785.1	62328.5	57182.3	54241.5	54815.1
O88968	Transcobalamin-2	Tcn2	O88968	O88968	Tcn2	Transcobalamin-2	TCO2_MOUSE	20	27431.6	26571.6	27958.3	26309.6	61715	58922.7	58551.8	57074.7
O88974	Histone-lysine N-methyltransferase SETDB1	Setdb1	O88974	O88974;D3YYC3;G5E8N3	Setdb1	Histone-lysine N-methyltransferase SETDB1	SETB1_MOUSE	6	8221.97	6770.1	8283.81	8186.81	6478.17	7270.49	7998.85	7257.96
O88983	Syntaxin-8	Stx8	O88983	O88983;Q8BS59;Q9D0J1	Stx8	Syntaxin-8	STX8_MOUSE	9	29566.3	28088	31557.8	28288.2	36660	35905.6	36502.8	33259
O88986	2-amino-3-ketobutyrate coenzyme A ligase, mitochondrial	Gcat	O88986	O88986;Q9CZ08	Gcat	2-amino-3-ketobutyrate coenzyme A ligase, mitochondrial	KBL_MOUSE	12	22787.4	35718.9	27940	22042.7	19540.3	20210.8	19337.2	19274.7
O89001	Carboxypeptidase D	Cpd	O89001	O89001	Cpd	Carboxypeptidase D	CBPD_MOUSE	27	22410.7	19346.3	20903.1	19302.5	24634.1	25053.3	24251.8	25251.7
O89016	Lysosomal cobalamin transporter ABCD4	Abcd4	O89016	O89016;A0A1Y7VMF7;Q80Y28	Abcd4	Lysosomal cobalamin transporter ABCD4	ABCD4_MOUSE	9	7725.92	9390.32	8948.54	9429.92	9361.66	10091.7	10579.7	9130.05
O89017	Legumain	Lgmn	O89017	O89017;A2RTI3	Lgmn	Legumain	LGMN_MOUSE	13	203023	201581	226086	219888	524204	562601	550326	521215
O89020	Afamin	Afm	O89020	O89020	Afm	Afamin	AFAM_MOUSE	16	14056.8	14911.2	16641.5	17081.8	9481.19	10789.9	10896.3	10836.4
O89023	Tripeptidyl-peptidase 1	Tpp1	O89023	O89023;Q3TDY6;Q3U2Z6	Tpp1	Tripeptidyl-peptidase 1	TPP1_MOUSE	13	45096.7	61848.7	56066.2	53826.5	110143	106912	108734	109814
O89032	SH3 and PX domain-containing protein 2A	Sh3pxd2a	O89032	O89032;A0A494BBI9	Sh3pxd2a	SH3 and PX domain-containing protein 2A	SPD2A_MOUSE	3		4051.81	2489.63	4842.46	5594.27	5889	6190.97	7430.99
O89033	Cell division control protein 6 homolog	Cdc6	O89033	O89033;A0A0R4J145	Cdc6	Cell division control protein 6 homolog	CDC6_MOUSE	1								3482.02
O89050	Muskelin	Mkln1	O89050	O89050;F6UW85	Mkln1	Muskelin	MKLN1_MOUSE	9	6135.2	4222.71	6406.58	5914.37	6589	5935.52	6394.74	6127.8
O89051	Integral membrane protein 2B	Itm2b	O89051	O89051;A0A2I3BPW7;Q3TVJ0;Q3UCT9;Q9D1Q3;Q9JME4	Itm2b	Integral membrane protein 2B	ITM2B_MOUSE	10	20627.1	15859.2	17956	15875.7	31768.8	26968.3	27269.7	26660.7
O89053	Coronin-1A	Coro1a	O89053	O89053;Q3U1N0;G3UYK8;Q3T9L1;Q3U232;Q3U9K3;A0A0U1RPY8;D3YW57;D3YXM2;G3UX53	Coro1a	Coronin-1A	COR1A_MOUSE	22	281949	224243	279370	315969	279715	274212	288900	291488
O89079	Coatomer subunit epsilon	Cope	O89079	O89079;D3Z315;Q9D1J2	Cope	Coatomer subunit epsilon	COPE_MOUSE	12	94980	99699.2	106001	106336	115113	97927.6	110999	109377
O89086	RNA-binding protein 3	Rbm3	O89086	O89086;Q545K5;Q8BG13	Rbm3	RNA-binding protein 3	RBM3_MOUSE	6	38844.8	36604.8	28733.4	35664.5	45143	45487.1	53888	47116.7
O89090	Transcription factor Sp1	Sp1	O89090	O89090;G3X8Q0	Sp1	Transcription factor Sp1	SP1_MOUSE	3	5608.89	5726.53	6047.22	5943.96	6483.41	6646.77	7470.41	6970.6
O89100	GRB2-related adaptor protein 2	Grap2	O89100	O89100;Q3U0E8	Grap2	GRB2-related adaptor protein 2	GRAP2_MOUSE	7	6751.9	6522.93	6634.38	7395.46	9413.01	7739.26	8406.79	6904.6
O89103	Complement component C1q receptor	Cd93	O89103	O89103;A7LNQ7;A7LNQ8;A7LNQ9;A7LNR0;A7LNR1	Cd93	Complement component C1q receptor	C1QR1_MOUSE	8	38352.1	39569.5	39233.8	44044.9	39214.9	41835.4	38454.8	40296.5
O89106	Bis(5'-adenosyl)-triphosphatase	Fhit	O89106	O89106;E9PZ91;E9PVU9;F6SV10	Fhit	Bis(5'-adenosyl)-triphosphatase	FHIT_MOUSE	6	15703.2	20654.2	16954.7	15149.5	15668.8	12602.1	14655.4	15171.6
O89110	Caspase-8	Casp8	O89110	O89110;A0A087WQT6;Q3U607;Q4FK85	Casp8	Caspase-8	CASP8_MOUSE	21	48861.9	38074.6	45890.2	48991	48843.5	45569.6	42510.3	40747.5
O89112	Glutathione S-transferase LANCL1	Lancl1	O89112	O89112;B2KGR2	Lancl1	Glutathione S-transferase LANCL1	LANC1_MOUSE	12	57014	60484	61353.2	55082.6	55859.9	53388.7	52519.1	55885
O89113	Immediate early response gene 5 protein	Ier5	O89113	O89113;Q3UJ54	Ier5	Immediate early response gene 5 protein	IER5_MOUSE	1	22063.2			22313.5	25746.3	26410.4		28847.4
O89116	Vesicle transport through interaction with t-SNAREs homolog 1A	Vti1a	O89116	O89116;Q5FWJ7;A0A286YDF2	Vti1a	Vesicle transport through interaction with t-SNAREs homolog 1A	VTI1A_MOUSE	5	16633.7	13911.1	14620.2	14629.3	16465.2	15509.7	15387.5	15233
P00158	Cytochrome b	Mt-Cyb	P00158	P00158;Q7JCZ3;Q7JCZ6;A0A023J5X5;A0A023J5Y8;A0A023J601;A0A023J614;A0A023J650;A0A023J6C8;A0A023J6J2;A0A067XLA2;A0A075DCW5;A0A0F6PXN8;A0A0F6PYR5;A0A0F6PZ78;A0A140GE27;A0A141CM53;A0A1B1SN51;A0A1B1SN54;A0A1B1SN68;A0A1B1SN75;A0A1B1SN86;A0A1B1SN97;A0A1B1SNA2;A0A1B1SNA4;A0A1B1SNA5;A0A1B1SNB0;A0A1B1SNB1;A0A1B1SNB3;A0A1B1SNB4;A0A1B1SNB5;A0A1B1SNB9;A0A1B1SNC0;A0A1B1SNC1;A0A1B1SNC3;A0A1B1SNC4;A0A1B1SNC5;A0A1…	Mt-Cyb	Cytochrome b	CYB_MOUSE	2	18210.8	34460	23125.1	29937.6	15618.3	20283.1	20261.2	17254.4
P00329	Alcohol dehydrogenase 1	Adh1	P00329	P00329;Q3UKA4	Adh1	Alcohol dehydrogenase 1	ADH1_MOUSE	22	350719	407936	415283	380050	430676	426959	410982	406559
P00375	Dihydrofolate reductase	Dhfr	P00375	P00375;Q544T5	Dhfr	Dihydrofolate reductase	DYR_MOUSE	10	21203.7	35535.8	30155.8	25151.4	22563.3	17821.4	20536.7	20777.3
P00397	Cytochrome c oxidase subunit 1	Mtco1	P00397	P00397;Q9MD68;A0A023J612;A0A023J6G7;A0A067XKP8;A0A075DCV7;A0A0F6PYU7;A0A140GE50;A0A286T486;A0A286T4B5;A0A286T4G6;A0A286T4G8;A0A286T4I5;A0A6M5UKG8;A0A6M5UL53;A0A6M5ULU7;A0A6M5ULW6;A0A6M5UNG0;A0A6M5UNR0;A0A6M5UP21;A0A6M5UPW9;A3E4A9;A3R454;Q5GA82;Q70YN3;Q7JD04;B3IYS1;Q35042	Mtco1	Cytochrome c oxidase subunit 1	COX1_MOUSE	1	291243	480028	384401	353229	305887	295991	320379	317886
P00405	Cytochrome c oxidase subunit 2	Mtco2	P00405	P00405;Q7JCZ1;Q7JD03;A0A023J6F3;A0A023J6I7;A0A075DC90;A0A0F6PXF3;A3E4B0;A3R455;A3R481;K7XK22;K7XKA7;Q5GA81	Mtco2	Cytochrome c oxidase subunit 2	COX2_MOUSE	10	759685	1091550	895900	749782	819791	758908	785476	866458
P00416	Cytochrome c oxidase subunit 3	mt-Co3	P00416	P00416;Q7JCX7;A0A023J622;A0A023J659;A0A023J667;A0A023J698;A0A023J699;A0A023J6D3;A0A075DCG2;A0A0F6PYW7;A0A141CM47;A3E4B3;A3R3W7;A3R458;B9V188;G3EBA9;K7XK11;Q5GA78;Q7JCA9;Q9MQW4	mt-Co3	Cytochrome c oxidase subunit 3	COX3_MOUSE	1	18321.8	26669.2	22683	23082.8	15754.7	20906.4	22720.3	19000.1
P00493	Hypoxanthine-guanine phosphoribosyltransferase	Hprt1	P00493	P00493;Q99KF5	Hprt1	Hypoxanthine-guanine phosphoribosyltransferase	HPRT_MOUSE	20	143133	146347	149430	151333	199220	207238	216981	216353
P00520	Tyrosine-protein kinase ABL1	Abl1	P00520	P00520;Q3SYK5;Q3TM13;Q3V2W1	Abl1	Tyrosine-protein kinase ABL1	ABL1_MOUSE	2	4158.7	3682.2	2828.96	3037.04	3970.07	3621.1	2456.43	2762.82
P00687	Alpha-amylase 1	Amy1	P00687	P00687;P00688;D3YYQ5;E9PV85;Q61297;Q8C5B4;Q99KE6	Amy1	Alpha-amylase 1	AMY1_MOUSE	11	21417.5	36825.9	20356.9	24055	19641.8	25666.3	40762.1	32109.4
P00688	Pancreatic alpha-amylase 2a5	Amy2a5	P00688	P00688;Q61299	Amy2a5	Pancreatic alpha-amylase 2a5	AM2A5_MOUSE	4	4864.77	7041.5	3850.92	4539.39	2828.88	3781.3	5441.03	4558.19
P00920	Carbonic anhydrase 2	Ca2	P00920	P00920	Ca2	Carbonic anhydrase 2	CAH2_MOUSE	15	561951	701590	594688	542594	525503	548005	598696	658226
P01027	Complement C3	C3	P01027	P01027	C3	Complement C3	CO3_MOUSE	111	421083	302012	402958	357579	347300	359183	353303	481262
P01029	Complement C4-B	C4b	P01029	P01029;A0AAQ4VMX2;B2RWX2;B2RXW7;B9EIU2;V9GZG9;V9GZJ5;V9GZQ6;Q3TAT4;Q3TYN1;Q9QUF7;Q9QUF8;Q9QUF9;Q9Z0D8;Q9Z0J3	C4b	Complement C4-B	CO4B_MOUSE	47	44298.7	44626.9	53477.6	52069.4	52690.6	45026.8	48544.2	60699.8
P01132	Pro-epidermal growth factor	Egf	P01132	P01132;A0A0G2JDT8;A0A0G2JF92;Q3UWD7;Q8VD07;A0A0G2JFB8	Egf	Pro-epidermal growth factor	EGF_MOUSE	13	12713	20418.9	12115.9	13159.9	8734.84	9989.01	14240.8	12786.9
P01592	Immunoglobulin J chain	Jchain	P01592	P01592	Jchain	Immunoglobulin J chain	IGJ_MOUSE	6	90945.8	57073	90063.4	131852	23763.3	26165.9	38833.2	31044.6
P01632	Ig kappa chain V-I region S107A	Igkv7-33	P01632	P01632;P01634;P01657;A0A0G2JDJ8;A0A0G2JEI6;A0A140T8P2;A2IXM7	Igkv7-33	Ig kappa chain V-I region S107A	KV1A1_MOUSE	1	33311.1	20385.2	21514	32628.1	25516.2	34228.1	23925.2	31098.9
P01635	Immunoglobulin kappa chain variable 12-41 (Fragment)	Igkv12-41	P01635	P01635;A0A0C6EL31;A2NW56;I6L978;Q920E6	Igkv12-41	Immunoglobulin kappa chain variable 12-41 (Fragment)	KV5A3_MOUSE	3	21722.8	17765.2	25712.9	26408.8	21947.5	32428.9	20903.2	23091
P01639	Immunoglobulin kappa chain variable 9-120	Igkv9-120	P01639	P01639;A0A140T8N0;A0A1E1GJG6	Igkv9-120	Immunoglobulin kappa chain variable 9-120	KV5A7_MOUSE	1	8944.18	6774.69	10961.2	12700.4	10228	7710.62	12763.6	11939.4
P01642	Immunoglobulin kappa variable 5-48 (Fragment)	Igkv5-48	P01642	P01642	Igkv5-48	Immunoglobulin kappa variable 5-48 (Fragment)	KV5A9_MOUSE	1	28921.3	16690.2	34327.2	71007.4	27172.2	35852.1	33284.5	32123.8
P01662	Ig kappa chain V-III region ABPC 22/PC 9245		P01662;P01663	P01662;P01663		Ig kappa chain V-III region ABPC 22/PC 9245	KV3AA_MOUSE;KV3AB_MOUSE	1	6106.62		1713.56	3296.47	2387.8	4099.37	2417.17	4410.41
P01671	Ig kappa chain V-III region PC 7175		P01671;P01673	P01671;P01673		Ig kappa chain V-III region PC 7175	KV3AJ_MOUSE;KV3AL_MOUSE	1		6961.67			4219.61	7669.53
P01675	Ig kappa chain V-VI region XRPC 44		P01675;P01676;P01677;P01678;P01679	P01675;P01676;P01677;P01678;P01679		Ig kappa chain V-VI region XRPC 44	KV6A1_MOUSE;KV6A2_MOUSE;KV6A3_MOUSE;KV6A4_MOUSE;KV6A5_MOUSE	1	2672.74	1875.87	2429.07	2546.67	4169.74	3759.34	2941.65	4126.94
P01831	Thy-1 membrane glycoprotein	Thy1	P01831	P01831;Q53YX2;A0A1L1SUX8	Thy1	Thy-1 membrane glycoprotein	THY1_MOUSE	8	289067	134526	247176	385632	271936	252336	211684	224022
P01837	Immunoglobulin kappa constant	Igkc	P01837	P01837;A0A0B6VQ20;A0A0C6EL31;A0A0D5ZY64;A0A0E4B213;A0A0F7R1B7;A0A0F7R5U8;A0A0M3KL49;A0A0M4KEQ7;A0A0U5BC76;A0A125T904;A0A125T906;A0A125T908;A0A4U9FD83;A0A5E3;A0A5H1ZRK8;A2NHM3;A2P1G9;I6L958;I6L978;I6L991;I6L9E1;I6L9E2;Q52L64;Q52L95;Q58EU8;Q5XFY8;Q65ZC0;Q7TS98	Igkc	Immunoglobulin kappa constant	IGKC_MOUSE	6	216577	142146	196479	239630	164682	181239	202673	216231
P01844	Ig lambda-2 chain C region	Iglc2	P01844	P01844;A0A4U9FFM1;Q99JC1	Iglc2	Ig lambda-2 chain C region	LAC2_MOUSE	2	11928	7773.45	30116.8	9214.78	4602.53	2553.93	4022.66	3310.01
P01845	Ig lambda-3 chain C region	Iglc3	P01845	P01845;A0A0G2JGQ8	Iglc3	Ig lambda-3 chain C region	LAC3_MOUSE	1	2106.13	2254.32	4945.07	2797.41	2075.32
P01863	Ig gamma-2A chain C region, A allele	Ighg	P01863	P01865;F6TQW2;P01864;A0A0A6YY53;P01863;A0A075B5P3;A0A0A6YVP0;A0A0E4B366;A0A0F7QZE4;A0A0F7R1P3;A0A4U9FGA5;A0A4V6JA63;Q505N9;Q569W9;Q569X1;Q58E56;Q5R3X4;Q66K04;Q6PF95;Q6PIP8;Q6PJA7;Q6PJB2;Q8R3H6;Q91Z05;Q9D8L4	Ighg	Ig gamma-2A chain C region, A allele	GCAA_MOUSE	2	212368	192223	219592	211787	191482	177421	171319	211984
P01867	Immunoglobulin heavy constant gamma 2B	Ighg2b	P01867	P01867;A0A075B5P3;A0A0A6YVP0;A0A0F7QZE4;A0A0F7R1P3;A0A4V6JA63;Q569X1;Q5R3X7;Q8R3H6;Q91Z05	Ighg2b	Immunoglobulin heavy constant gamma 2B	IGG2B_MOUSE	8	397097	303646	434606	492341	338678	306186	333458	303773
P01868	Ig gamma-1 chain C region secreted form	Ighg1	P01868;P01869	P01868;P01869;A0A075B5P4;A0A0A6YWR2;A0A0B6VMB2;A0A0C6E3V3;A0A0M4KM70;A0A4U9FFL2;I6L985;Q99LC4;U5LP42	Ighg1	Ig gamma-1 chain C region secreted form	IGH1M_MOUSE;IGHG1_MOUSE	6	111841	117562	132738	82040.9	68829.6	81063.4	134241	111070
P01872	Immunoglobulin heavy constant mu	Ighm	P01872	P01872;A0A075B6A0;A0A075B5P6	Ighm	Immunoglobulin heavy constant mu	IGHM_MOUSE	25	399681	249701	399161	364278	201342	241132	311251	195798
P01887	Beta-2-microglobulin	B2m	P01887	P01887;Q3U679;Q9D239;Q91Z72;Q91Z73	B2m	Beta-2-microglobulin	B2MG_MOUSE	4	109617	90319.5	103821	115666	191337	158727	129483	132304
P01898	H-2 class I histocompatibility antigen, Q10 alpha chain	H2-Q10	P01898	P01898;Q8HWL1;A0A2Z4SXF4;A0A2Z4SXH9;A0A2Z4SXJ4;A0A2Z4SXX1;A0A2Z4SYI0;A0A2Z4SZ94;A0A2Z4SZJ5;A0A2Z4T1R8;A0A2Z4T1U4	H2-Q10	H-2 class I histocompatibility antigen, Q10 alpha chain	HA10_MOUSE	13	77756.5	57338.6	84468.7	92888.5	78891.3	63530.7	52578.5	63170.6
P01899	H-2 class I histocompatibility antigen, D-B alpha chain	H2-D1	P01899	P01899;A0A482D1Q0;G3UZP7;O78206;O78207;Q31167;Q31168;Q792Z7;W5XQG0	H2-D1	H-2 class I histocompatibility antigen, D-B alpha chain	HA11_MOUSE	13	227353	195175	266358	232985	446181	349733	322934	271116
P01901	H-2 class I histocompatibility antigen, K-B alpha chain	H2-K1	P01901	P01901;A0A494BA33;A0A494BAT0;G3UXW2;Q3TH01;Q3TVI9;Q3UBW0;Q61642;Q61895;Q64272;Q7JJ15;W5XHY0;W5XIK7;W5XIT1;A0A2Z4SXE9;A0A2Z4SXG3;A0A2Z4SXK6;A0A2Z4SYV8;A0A2Z4SZ19;A0A2Z4SZ54;A0A2Z4T1M3;A0A2Z4T1Z5;A0A2Z4T2N0;A0A2Z4T309;A0A2Z4T3T7;D2YW38	H2-K1	H-2 class I histocompatibility antigen, K-B alpha chain	HA1B_MOUSE	19	72958.5	61634.4	91497	78892.3	164136	121335	122518	90514.8
P02088	Hemoglobin subunit beta-1	Hbb-b1	P02088	P02088;P02089;D0U269;D0U270;D0U284;D0U285;D4N6M2;D4N6N2;D4N6N9;D4N6R6;D4N6U4;D4N6V9;Q549D9;Q9QUN8;A8DUK0;A8DUK2;A8DUL5;A8DUP5;A8DV41;A8DV59;D0U293;Q54AH9	Hbb-b1	Hemoglobin subunit beta-1	HBB1_MOUSE	5	14580.5	27927.1	24463.4	24212.2	17008.3	20759.9	21571.9	24804
P02104	Hemoglobin subunit epsilon-Y2	Hbb-y	P02104	P02104;Q9CR49;Q9D0B2	Hbb-y	Hemoglobin subunit epsilon-Y2	HBE_MOUSE	3	1047760	2277590	1610700	2020280	877017	1468650	1456840	1716430
P02301	Histone H3.3C	H3-3a	P02301;P84244	P02301;P84244;A0A8X6EH29;E0CYN1;E0CYR7;E0CZ27;F8WI35	H3-3a;H3-5	Histone H3.3C	H33_MOUSE;H3C_MOUSE	1	1692.14	54222.9	74720.9	59231.5	44525			83536.8
P02463	Collagen alpha-1(IV) chain	Col4a1	P02463	P02463;F7CK55;Q3TP61;Q63ZW6;Q80V57;Q8BNS7;Q9ESQ2;P70165;Q61436	Col4a1	Collagen alpha-1(IV) chain	CO4A1_MOUSE	9	273763	296839	263595	238158	291027	238824	202344	178100
P02468	Laminin subunit gamma-1	Lamc1	P02468	P02468;F8VQJ3;Q3UNG0	Lamc1	Laminin subunit gamma-1	LAMC1_MOUSE	55	90210.6	94025	88055.3	88525.4	83701.3	83551.1	78045.7	80490.3
P02469	Laminin subunit beta-1	Lamb1	P02469	P02469;E9QN70;Q3TNZ8;Q3UHL7;B9EKB0;Q0V927	Lamb1	Laminin subunit beta-1	LAMB1_MOUSE	52	110977	107840	106844	104741	104316	106035	97523.8	102505
P02535	Keratin, type I cytoskeletal 10	Krt10	P02535	P02535;Q61781;Q9Z2K1;Q61414;Q8VCW2;Q9Z320;A2A513;B2RU72;Q3SYP5;B1AQ77;Q3ZAW8;Q9EQD6;Q9EQD7	Krt10	Keratin, type I cytoskeletal 10	K1C10_MOUSE	9	53382	36309.4	39853	50392.4	165897	48970.9	36207.1	54951.2
P02798	Metallothionein-2	Mt2	P02798	P02798	Mt2	Metallothionein-2	MT2_MOUSE	1		2915.33	136479		2047.71			3791.1
P03888	NADH-ubiquinone oxidoreductase chain 1	Mtnd1	P03888	P03888;Q4JFN6;A0A023J5Z6;A0A023J609;A0A023J624;A0A023J675;A0A023J6A1;A0A023J6B5;A0A023J6F7;A0A023J6L7;A0A067XKM5;A0A067XKW4;A0A067XL97;A0A075DCA9;A0A0F6PXJ9;A0A141CM15;A0A141CM41;A0A7U3PY34;A3E4A7;A3R452;B9V1J9;G3EB90;Q3TNL9;Q5GA84;Q7JD06	Mtnd1	NADH-ubiquinone oxidoreductase chain 1	NU1M_MOUSE	5	44073	71461.4	56536.2	48265.1	43515.8	43068.4	51684.5	49150.9
P03893	NADH-ubiquinone oxidoreductase chain 2	mt-Nd2	P03893	P03893;Q9MD59;A0A023J5X8;A0A023J604;A0A023J616;A0A023J633;A0A023J641;A0A023J657;A0A023J665;A0A023J687;A0A023J695;A0A023J697;A0A023J6E5;A0A067XKM8;A0A067XKV2;A0A067XKW9;A0A075DCF9;A0A0F6PXG3;A0A141CM16;A0A141CM29;A0A141CM42;A0A286T435;A0A286T455;A0A286T498;A0A286T4B0;A0A286T4C2;A0A286T4G1;A0A286T6J5;A0A286T6K6;A0A286T6K7;A0A286T6L5;A0A286T6N3;A0A286T6N5;A0A286T6P3;A0A286T6X5;A0A6M8TW30;A3E4A8;A3R4…	mt-Nd2	NADH-ubiquinone oxidoreductase chain 2	NU2M_MOUSE	1	6093.35	9413.71	7063.01	4226.53	3707.95	4675.77	6511.27	6167.14
P03899	NADH-ubiquinone oxidoreductase chain 3	mt-Nd3	P03899	P03899;Q7GIP5;A0A023J682;A0A023J686;A0A067XKP9;A0A067XLA1;A0A075DCW1;A0A0F6PZ20;A0A141CM22;A3E4B4;A3R459;A3R485;Q5GA77	mt-Nd3	NADH-ubiquinone oxidoreductase chain 3	NU3M_MOUSE	1	37540.6	57193.5	39770.8	38405	24693.1	25886.3	27066	26347.4
P03911	NADH-ubiquinone oxidoreductase chain 4	Mtnd4	P03911	P03911;A0A023J5X7;A0A023J5Z0;A0A023J632;A0A023J654;A0A023J663;A0A023J684;A0A023J692;A0A023J6C5;A0A023J6E1;A0A023J6G6;A0A023J6K5;A0A023J6M1;A0A067XKR4;A0A067XKW7;A3E4B6;A3R461;A3R4A0;B9V1K8;K7X731;K7X7Z6;Q5GA75;Q7JCY6;Q7JCZ9;A0A075DCI1;A0A141CM24;A0A141CM50;A0A6M8U8E2;A9UIX0;F1JVR2;Q3UPP3;Q9ME04;W0TGY1	Mtnd4	NADH-ubiquinone oxidoreductase chain 4	NU4M_MOUSE	8	69274.9	91200.8	83109.4	71958	70809.6	53224.1	62425.9	63586
P03921	NADH-ubiquinone oxidoreductase chain 5	Mtnd5	P03921	P03921;Q9MD82;A0A023J5X2;A0A023J5Y5;A0A023J5Z8;A0A023J611;A0A023J627;A0A023J655;A0A023J672;A0A023J679;A0A023J6A9;A0A023J6C1;A0A023J6F2;A0A023J6G4;A0A023J6G8;A0A023J6I6;A0A023J6J5;A0A023J6L2;A0A067XKN8;A0A067XKV1;A0A067XKW0;A0A067XL99;A0A075DCB1;A0A0F6PYU6;A0A141CM25;A0A141CM38;A0A141CM51;A0A6M8U123;A3E4B7;A3R462;A3R488;B9V192;B9V1K9;K7XJX5;N0DTI5;Q3UQ68;Q3UQD2;Q3UVI0;Q4JFM6;Q5GA74;Q7GIP3;Q7JCZ8	Mtnd5	NADH-ubiquinone oxidoreductase chain 5	NU5M_MOUSE	4	6144.48	8724.21	8788.09	7261.84	6594	5264.99	6916.73	7677.06
P03930	ATP synthase protein 8	Mtatp8	P03930	P03930;Q7JCZ0;A0A023J653;A0A023J6C2;A0A0F6PXT9;A0A141CM32;A0A6M8U8I5;A3E4B1;A3R404;A3R456;D2J4F9;Q5GA80;Q7JD02	Mtatp8	ATP synthase protein 8	ATP8_MOUSE	3	244011	328685	262481	233751	228612	227482	223377	226823
P03953	Complement factor D	Cfd	P03953	P03953;B7ZNS9;Q3UP47	Cfd	Complement factor D	CFAD_MOUSE	10	72596.1	88460.4	74544.3	96388.8	76853.7	77013.6	80369.8	93641.3
P03958	Adenosine deaminase	Ada	P03958	P03958;Q4FK28;Q4FJZ7	Ada	Adenosine deaminase	ADA_MOUSE	15	40901.2	41253.5	38958.3	41470.6	42489.1	40978.8	45397.2	45614.9
P03977	Ig kappa chain V-III region 50S10.1		P03977	P03977		Ig kappa chain V-III region 50S10.1	KV3A4_MOUSE	1	15630.5	5141.26	4193.93	7364.64	6165.4		12172.8	12280.6
P03995	Glial fibrillary acidic protein	Gfap	P03995	P03995	Gfap	Glial fibrillary acidic protein	GFAP_MOUSE	4	4243.63	3126.8	4673.45	4833.5	4796.99	5031.25	3830.83	12937.3
P04104	Keratin, type II cytoskeletal 1	Krt1	P04104	P04104	Krt1	Keratin, type II cytoskeletal 1	K2C1_MOUSE	3	33938.1	11737.8	13247.4	21769.8	61484.2	13817.5	18296.8	39619.2
P04117	Fatty acid-binding protein, adipocyte	Fabp4	P04117	P04117;Q542H7	Fabp4	Fatty acid-binding protein, adipocyte	FABP4_MOUSE	13	601047	626402	588915	515418	489963	537941	566391	566996
P04186	Complement factor B	Cfb	P04186	P04186;B8JJM5;B8JJM6;B8JJN0;Q3UEG8;F6VQX8;F6XQ00;Q3UAS8	Cfb	Complement factor B	CFAB_MOUSE	38	173581	133569	183801	196068	198572	179825	162372	187706
P04187	Granzyme B(G,H)	Gzmb	P04187	P04187;Q3TIP3;Q3TZH4;Q4FJY0	Gzmb	Granzyme B(G,H)	GRAB_MOUSE	6				4156.65	10400.9	11604.1	8105.61	9205.19
P04202	Transforming growth factor beta-1 proprotein	Tgfb1	P04202	P04202;Q3UNK5	Tgfb1	Transforming growth factor beta-1 proprotein	TGFB1_MOUSE	4	5202.19	3657.38	4096.81	4768.67	3855.92	4670.12	5337.33	6198.61
P04223	H-2 class I histocompatibility antigen, K-K alpha chain	H2-K1	P04223	P04223;B2RY37;E9PX63;K7WBQ4;O19441;Q31173;Q31215;Q4KN89;Q4VCM3;Q5KTQ0;Q66JR0;Q6QMF3;Q8SNA4;A0A2Z4SXH8;A0A2Z4SXU0;A0A2Z4SY38;A0A2Z4SYW5;A0A2Z4T2S5;A0A2Z4T3D8;A0A2Z4T460	H2-K1	H-2 class I histocompatibility antigen, K-K alpha chain	HA1K_MOUSE	1					7258.53
P04230	H-2 class II histocompatibility antigen, E-B beta chain	H2-Eb1	P04230	P18468;P04230;P04231;P20040;O78196;Q31103;Q31162;Q31163;Q31164;Q3U1H1;A0A2Z4SWZ4;A0A2Z4SWZ5;A0A2Z4SX15;A0A2Z4SX16;A0A2Z4SX26;A0A2Z4SX81;A0A2Z4SX90;A0A2Z4SXB5;A0A2Z4SXC6;A0A2Z4SXE7;A0A2Z4SY02;A0A2Z4SY32;A0A2Z4SY53;A0A2Z4SYI8;A0A2Z4SYN0;A0A2Z4SYP0;A0A2Z4SYS8;A0A2Z4SYT7;A0A2Z4T169;A0A2Z4T178;A0A2Z4T188;A0A2Z4T196;A0A2Z4T282;A0A2Z4T2A8;A0A2Z4T397;A0A2Z4T3A7;A0A498U6I0;E5FDC7;E5FDC8;E5FDD1;E5FDD2;E5FD…	H2-Eb1	H-2 class II histocompatibility antigen, E-B beta chain	HB21_MOUSE	6	39159.7	31684.1	40422.9	37727.4	27534.7	22528.2	24670.3	24836.8
P04231	H-2 class II histocompatibility antigen, E-S beta chain (Fragment)	H2-Eb1	P04231;P18468	P18468;P04231;P20040;A0A068BFU4;O78196;Q31103;Q31162;Q31163;Q31164;Q3U1H1;Q9GIQ7;Q9TP15;A0A2Z4SWZ4;A0A2Z4SWZ5;A0A2Z4SWZ8;A0A2Z4SX04;A0A2Z4SX15;A0A2Z4SX16;A0A2Z4SX17;A0A2Z4SX26;A0A2Z4SX54;A0A2Z4SX81;A0A2Z4SX90;A0A2Z4SXB5;A0A2Z4SXC6;A0A2Z4SY32;A0A2Z4SY53;A0A2Z4SYI8;A0A2Z4SYN0;A0A2Z4SYP0;A0A2Z4SYQ8;A0A2Z4SYS8;A0A2Z4SYT7;A0A2Z4T169;A0A2Z4T188;A0A2Z4T196;A0A2Z4T259;A0A2Z4T270;A0A2Z4T282;A0A2Z4T2A8;A0A…	H2-Eb1	H-2 class II histocompatibility antigen, E-S beta chain (Fragment)	HB23_MOUSE;HB2I_MOUSE	1	30817.7	23372.8	29124.4	34633	21203.5	12382.8	10254	15563
P04235	T-cell surface glycoprotein CD3 delta chain	Cd3d	P04235	P04235;A0N8K9;Q3U4T1;Q3U572;Q3V3B4;Q6P5P1	Cd3d	T-cell surface glycoprotein CD3 delta chain	CD3D_MOUSE	1	4096.48	2512.13	3469.36	3870.73		2828.95	3427.51	4168.68
P04247	Myoglobin	Mb	P04247	P04247;Q3UVB1;A0A2R8W6F8	Mb	Myoglobin	MYG_MOUSE	2		1176.82	938.351	1534.48			414.41
P04370	Myelin basic protein	Mbp	P04370	P04370;A0A411P8U6;A0A498WGS3;Q09J72;Q3UGF3;Q5D096;Q542T4	Mbp	Myelin basic protein	MBP_MOUSE	6	2922.3				6388.86	2431.19		27731.8
P04441	H-2 class II histocompatibility antigen gamma chain	Cd74	P04441	P04441;Q3U4Q8;Q545Y5	Cd74	H-2 class II histocompatibility antigen gamma chain	HG2A_MOUSE	17	127385	94856.1	139474	115447	162133	150312	158197	161832
P04443	Hemoglobin subunit beta-H0	Hbb-bh0	P04443;P04444	P04443;P04444;Q5EBL1;Q61600;Q9CZK5	Hbb-bh0;Hbb-bh1	Hemoglobin subunit beta-H0	HBB0_MOUSE;HBBZ_MOUSE	1	2337.84	5127.4	3223.92	4696.62	6078.83	3927.54	2383.87	5787.21
P04627	Serine/threonine-protein kinase A-Raf	Araf	P04627	P04627;P28028;Q99N57;A0A7N4FLU7;E9Q0P8;Q3TQI2;Q3UXR0;Q9CU36;F6TUC4	Araf	Serine/threonine-protein kinase A-Raf	ARAF_MOUSE	10	9139.43	10370.7	10711.8	8973.58	9923.87	10783.5	10537.6	11095.2
P04919	Band 3 anion transport protein	Slc4a1	P04919	P04919;Q3TAJ4;Q3TNH7;Q3TNL6;Q3TZJ1;Q3U065;Q53ZN9	Slc4a1	Band 3 anion transport protein	B3AT_MOUSE	22	22780.9	53491.1	36550.8	43212	21240.4	29503.3	32073.9	46602.6
P04925	Major prion protein	Prnp	P04925	P04925;Q4FJQ7;Q3TZI7;Q3UBH0;Q3UF68;Q3UG89;Q9QYT9	Prnp	Major prion protein	PRIO_MOUSE	3	5399.12	6127.67	6052.52	7025.43	10993.7	12490	11135.6	9600.94
P04939	Major urinary protein 3	Mup3	P04939	P04939;P11590;A2ANT5;Q3KQQ2	Mup3	Major urinary protein 3	MUP3_MOUSE	8	263801	175383	306101	263658	392151	278836	216825	270815
P05017	Insulin-like growth factor 1	Igf1	P05017	P05017;Q8CAR0;D3Z7M4;E9PU89;E9Q138;Q4VJB9;Q4VJC0;Q547V2	Igf1	Insulin-like growth factor 1	IGF1_MOUSE	1	2976.18	4244.24	3594.97	5323.29	26294.5	20041.2	20759.8	24099.5
P05063	Fructose-bisphosphate aldolase C	Aldoc	P05063	P05063	Aldoc	Fructose-bisphosphate aldolase C	ALDOC_MOUSE	12	8779.1	11318.3	10688.5	8122.14	9273.32	10919.5	10295.9	13868.7
P05064	Fructose-bisphosphate aldolase A	Aldoa	P05064	P05064;A0A0U1RPT5;A6ZI44;D3YV98;A0A0U1RPN8;A6ZI47;D3YWI1;D3Z510;Q5FWB7;Q6NY00	Aldoa	Fructose-bisphosphate aldolase A	ALDOA_MOUSE	44	477096	511400	478763	472970	506163	532601	528739	544480
P05132	cAMP-dependent protein kinase catalytic subunit alpha	Prkaca	P05132	P05132;J9JDU9	Prkaca	cAMP-dependent protein kinase catalytic subunit alpha	KAPCA_MOUSE	1	22926.4	23004.5	23213.6	22852.1	24872.2	20807.9	19549.6	23876.3
P05201	Aspartate aminotransferase, cytoplasmic	Got1	P05201	P05201	Got1	Aspartate aminotransferase, cytoplasmic	AATC_MOUSE	28	253953	316637	287262	246060	298805	290125	296650	316846
P05202	Aspartate aminotransferase, mitochondrial	Got2	P05202	P05202	Got2	Aspartate aminotransferase, mitochondrial	AATM_MOUSE	39	384856	556081	461294	440910	400874	385685	401913	436794
P05366	Serum amyloid A-1 protein	Saa1	P05366	P05366;Q3UWC2;Q5I0U6;Q64454	Saa1	Serum amyloid A-1 protein	SAA1_MOUSE	1							21766.4
P05367	Serum amyloid A-2 protein	Saa2	P05367	P05366;P05367;A0A1B0GQV5;Q3UWC2;Q5I0U6;Q64454;Q8R3T4	Saa2	Serum amyloid A-2 protein	SAA2_MOUSE	2	46043.1	5497.49	91521.4	103461	198714	67800.3	26755.3	309075
P05480	Proto-oncogene tyrosine-protein kinase Src	Src	P05480	P05480;P39688;Q04736;Q3TJI7;D3YZ57;Q3UKD6;Q8C762;Q8CBP1	Src	Proto-oncogene tyrosine-protein kinase Src	SRC_MOUSE	12	23401.8	24537.6	21336.4	24547	21239.1	25198	22796.3	22745.6
P05555	Integrin alpha-M	Itgam	P05555	P05555;E9Q5K8;A0A0R4J1B4;E9Q604;G5E8F1;Q3TBT0;Q3TD86;Q3U1U4;Q3U3F0;Q3U4I5;Q3UJ88	Itgam	Integrin alpha-M	ITAM_MOUSE	37	62628.3	48091.9	60265.8	69652.8	55097.1	62269.3	56159.1	61834
P05622	Platelet-derived growth factor receptor beta	Pdgfrb	P05622	E9QN12;P05622;Q3UYC9;Q7TMR8;Q003I5;Q3TZ27	Pdgfrb	Platelet-derived growth factor receptor beta	PGFRB_MOUSE	23	35281.8	33294.6	35757	42818.1	50255.7	43100.5	41505.5	50480
P05627	Transcription factor Jun	Jun	P05627	P05627;A0AA74KT59;Q3US19;Q3V255;Q52L79	Jun	Transcription factor Jun	JUN_MOUSE	1	2937.89	2082.41	3075.38	3570.07	2989.89	3004.3	4523.36	3349.57
P05784	Keratin, type I cytoskeletal 18	Krt18	P05784	P05784	Krt18	Keratin, type I cytoskeletal 18	K1C18_MOUSE	30	350041	324039	305134	320003	360159	386005	361463	356222
P05977	Myosin light chain 1/3, skeletal muscle isoform	Myl1	P05977;P09542	P09542;P05977;A0A0G2JDM3;A0A0G2JDW2;Q545T7;Q61935;A0A087WRZ7;E9PWG4;Q545G5;Q6PCW9	Myl1;Myl3	Myosin light chain 1/3, skeletal muscle isoform	MYL1_MOUSE;MYL3_MOUSE	2	145368	153721	147036	153683	159883	162329	169399	176134
P06151	L-lactate dehydrogenase A chain	Ldha	P06151	P06151;A0A1B0GSX0;Q99K20;A0A1B0GSR9;Q3TCI7;Q3THB4;Q3TI99;Q3UDU4;Q3UIC3;Q564E2	Ldha	L-lactate dehydrogenase A chain	LDHA_MOUSE	38	967206	948059	931202	939847	905677	865416	825555	865885
P06281	Renin-1	Ren1	P06281	P00796;P06281;Q91X66	Ren1	Renin-1	RENI1_MOUSE	11	59032.3	102181	100486	90993.2	143667	144136	200566	175932
P06327	Ig heavy chain V region VH558 A1/A4	Gm5629	P06327	P06327;A0A075B5Y6;K7TD85;K7THH3;X5J5D1;X5J5N5	Gm5629	Ig heavy chain V region VH558 A1/A4	HVM52_MOUSE	1	27719.6	40606.4	34823.9	35241.1	32513.2	34407.6	37379.9	34170.9
P06332	T-cell surface glycoprotein CD4	Cd4	P06332	P06332;Q3TSV7;O55054;Q61396	Cd4	T-cell surface glycoprotein CD4	CD4_MOUSE	1	1060.07	708.484	743.301		2407.66	1464.19	2349.57
P06339	H-2 class I histocompatibility antigen, D-37 alpha chain	H2-T23	P06339	P01902;P06339;P14432;O19440;Q4VCN4;Q4VCN9;Q4VCP2;Q6PEB5;Q6QMF2;V9HVU9;A0A482CGP7;A0A482CYR5;A7VMS2;B2RY37;F6TIX5;O35641;Q05A75;Q31148;Q31156;Q31169;Q31170;Q31191;Q31206;Q31218;Q31290;Q31614;Q31615;Q31634;Q3V014;Q4VCM3;Q5KTQ1;Q5KTQ2;Q60678;Q61891;Q6RJ37;Q85ZZ4;Q861Q6;Q8HWB4;Q8WLM9;A0A2Z4SXU8;A0A2Z4SY50;A0A2Z4SY61;A0A2Z4SYX1;A0A2Z4SYY0;A0A2Z4SZQ1;A0A2Z4SZR0;A0A2Z4T208;A0A2Z4T220;A0A2Z4T478;A7VMS4;A…	H2-T23	H-2 class I histocompatibility antigen, D-37 alpha chain	HA15_MOUSE	4	4798.09	3434.65	5563.52	4309.29	9237.07	5608.01	4794.16	4608.81
P06537	Glucocorticoid receptor	Nr3c1	P06537	P06537;E9Q310;Q05DD1	Nr3c1	Glucocorticoid receptor	GCR_MOUSE	6	9158.86	6598.03	8228.41	7307.52	7330.26	5917.86	6662.56	4901.75
P06683	Complement component C9	C9	P06683	P06683;A0A0R4J032	C9	Complement component C9	CO9_MOUSE	16	22897.6	19841	26048.4	25426.8	16457.4	14681.1	12918.7	14591.2
P06684	Complement C5	C5	P06684	P06684;Q8BNV3	C5	Complement C5	CO5_MOUSE	35	35491.7	36211.8	41912.4	38336.6	23834.5	27149.3	26285	29240.5
P06728	Apolipoprotein A-IV	Apoa4	P06728	P06728;Q01488;Q9DBN0;Q810I7	Apoa4	Apolipoprotein A-IV	APOA4_MOUSE	30	103812	92180.9	90450.5	109810	96686.3	142769	92373.5	135928
P06745	Glucose-6-phosphate isomerase	Gpi	P06745	P06745;B2RXT5;B7ZWL9	Gpi	Glucose-6-phosphate isomerase	G6PI_MOUSE	34	663346	703561	730000	755437	702098	734377	680586	783038
P06797	Procathepsin L	Ctsl	P06797	P06797;Q3TNC8;Q3TT75;Q3TVJ1;Q3U5U9;Q3UHZ4;Q543M3;Q9D0C0;A0A1Y7VNM3;A0A1Y7VNQ4;Q3UWH6	Ctsl	Procathepsin L	CATL1_MOUSE	16	122068	88671.9	102425	118410	564592	585541	489565	520932
P06800	Receptor-type tyrosine-protein phosphatase C	Ptprc	P06800	P06800;Q3U382;Q64730;Q8C6Q7;S4R1M0	Ptprc	Receptor-type tyrosine-protein phosphatase C	PTPRC_MOUSE	31	30366.4	25839.2	35894.3	37507.8	37817.2	36949.8	36571.6	36200.8
P06801	NADP-dependent malic enzyme	Me1	P06801	P06801;Q3TQP6;Q3TQW1;Q921S3;Q99LF5	Me1	NADP-dependent malic enzyme	MAOX_MOUSE	35	244282	288606	290964	239332	251410	230094	228666	216235
P06802	Ectonucleotide pyrophosphatase/phosphodiesterase family member 1	Enpp1	P06802	A0A0R4J1Q7;P06802;G3X9S2;Q3V3C8	Enpp1	Ectonucleotide pyrophosphatase/phosphodiesterase family member 1	ENPP1_MOUSE	22	31521.3	22429.8	27917.4	30878.7	30446.8	31284.1	30893.1	29980.1
P06837	Neuromodulin	Gap43	P06837	P06837	Gap43	Neuromodulin	NEUM_MOUSE	1					1030.29			1607.44
P06869	Urokinase-type plasminogen activator	Plau	P06869	P06869;Q0VBA8	Plau	Urokinase-type plasminogen activator	UROK_MOUSE	13	17606.5	18548	16186.5	14854.9	17837.3	19571.6	22210.3	21639.9
P06909	Complement factor H	Cfh	P06909	P06909;D6RGQ0;E9Q8H9;E9Q8I0;Q4LDF6;Q61405;Q61407;Q8R0I8;A0A0A6YVP8	Cfh	Complement factor H	CFAH_MOUSE	51	563990	432142	611443	651838	496988	502389	459056	519014
P07091	Protein S100-A4	S100a4	P07091	P07091;Q545V2;A0A0G2JGD2	S100a4	Protein S100-A4	S10A4_MOUSE	6	44678.2	39273.7	54874.9	58918.6	36300.3	47316.9	45899.5	58702.4
P07141	Macrophage colony-stimulating factor 1	Csf1	P07141	P07141;Q3TDK0;Q3TLQ6;Q3U4F9;D3YTW1;D3Z090;F6RNW8	Csf1	Macrophage colony-stimulating factor 1	CSF1_MOUSE	4	5934.39	5710.72	5556.84	7296.34	10457.8	7923.6	7262.68	9070.39
P07214	SPARC	Sparc	P07214	P07214;A0A1L1SSH9;Q3TXI6;Q5NCU3;Q5NCU4;Q5NCU5	Sparc	SPARC	SPRC_MOUSE	14	82399.7	50751.2	80969.7	97233.8	128979	101353	90009.3	109372
P07309	Transthyretin	Ttr	P07309	P07309;Q5M9K1	Ttr	Transthyretin	TTHY_MOUSE	8	226421	191833	236328	322429	523582	537001	455215	468736
P07310	Creatine kinase M-type	Ckm	P07310	P07310;A0A0J9YKD4;A2RTA0;Q9D6U7	Ckm	Creatine kinase M-type	KCRM_MOUSE	4	14928.9	6840.37	6143.82	4662.4	4655.55	8807.25		5384.24
P07356	Annexin A2	Anxa2	P07356	P07356;Q542G9;B0V2N5;Q3UCD3;Q99KH3	Anxa2	Annexin A2	ANXA2_MOUSE	31	645972	582470	565200	633381	611076	635941	596604	636172
P07361	Alpha-1-acid glycoprotein 2	Orm2	P07361	P07361	Orm2	Alpha-1-acid glycoprotein 2	A1AG2_MOUSE	3	16201.2	2344.47	17768.8	29347.6	20228.9	21197.8	18429.3	52874.1
P07607	Thymidylate synthase	Tyms	P07607	P07607;Q544L2;A0A0G2JF03;Q8VDV6;Q9D0H1;A0A0G2JF31;A0A0G2JGG2;D6RCW9	Tyms	Thymidylate synthase	TYSY_MOUSE	4	11296.5	12096.9	11543.8	12268.8	15756.7	14080.4	12762.2	11943.8
P07724	Albumin	Alb	P07724	P07724;Q546G4	Alb	Albumin	ALBU_MOUSE	63	2982790	3292920	2794770	3558870	2839170	3249000	3169810	3084490
P07742	Ribonucleoside-diphosphate reductase large subunit	Rrm1	P07742	P07742;Q05DU8;Q6NZB3	Rrm1	Ribonucleoside-diphosphate reductase large subunit	RIR1_MOUSE	10	10507.3	10793.8	11367.3	10681.5	10579.5	12442.2	11104.2	10163.9
P07758	Alpha-1-antitrypsin 1-1	Serpina1a	P07758;Q00896	P07758;Q00896;A0A0A0MQA3;A0A0R4J0X5	Serpina1a;Serpina1c	Alpha-1-antitrypsin 1-1	A1AT1_MOUSE;A1AT3_MOUSE	6	386526	279162	399402	554224	275891	240245	189058	241955
P07759	Serine protease inhibitor A3K	Serpina3k	P07759	P07759;A0A0R4J0I1	Serpina3k	Serine protease inhibitor A3K	SPA3K_MOUSE	27	605370	531566	552764	671638	644195	649559	547106	564943
P07901	Heat shock protein HSP 90-alpha	Hsp90aa1	P07901	P07901;Q80Y52;Q3TKA2;Q3UIF3;A0PJ91;Q3TJU7;Q3TKB9;Q3TKG0;Q8C5U3	Hsp90aa1	Heat shock protein HSP 90-alpha	HS90A_MOUSE	51	945059	787717	903492	930133	907797	801142	787363	794911
P07903	DNA excision repair protein ERCC-1	Ercc1	P07903	P07903	Ercc1	DNA excision repair protein ERCC-1	ERCC1_MOUSE	3	1555.86	2293.97	1514.06	2439.23	2239.86	2750.61	1450.69	2401.34
P08003	Protein disulfide-isomerase A4	Pdia4	P08003	P08003;A0A0R4J0Z1	Pdia4	Protein disulfide-isomerase A4	PDIA4_MOUSE	46	400083	327953	405689	428208	357315	332855	307140	322226
P08030	Adenine phosphoribosyltransferase	Aprt	P08030	P08030;A0A1D5RLR6	Aprt	Adenine phosphoribosyltransferase	APT_MOUSE	11	94441.7	85482.4	99973.9	101306	112563	110820	113484	115018
P08032	Spectrin alpha chain, erythrocytic 1	Spta1	P08032	P08032	Spta1	Spectrin alpha chain, erythrocytic 1	SPTA1_MOUSE	53	7858.52	15816.3	11669.8	13622.9	7156.44	9566.34	10006.1	12841.1
P08046	Early growth response protein 1	Egr1	P08046;P08152;P43300	P08046;P08152;P43300;Q3U207;Q544D6;D3Z3K7;Q3UM09;Q3UZU7;Q8CAT6;Q3ZB14;Q3ZB15;Q496R7	Egr1;Egr2;Egr3	Early growth response protein 1	EGR1_MOUSE;EGR2_MOUSE;EGR3_MOUSE	1	3920.67	1738.83			1456.19	4748.86	3081.94	4525.04
P08071	Lactotransferrin	Ltf	P08071	P08071;B8YJF9;Q4FJR3;Q3TP24;Q3UBV2	Ltf	Lactotransferrin	TRFL_MOUSE	54	121508	82178.5	113516	121545	120981	122910	102881	178598
P08074	Carbonyl reductase [NADPH] 2	Cbr2	P08074	P08074;F6YNX9;Q542P5	Cbr2	Carbonyl reductase [NADPH] 2	CBR2_MOUSE	5	18652.3	19841.9	21721.3	20506.6	19282.1	27150.2	15578.7	23235.7
P08101	Low affinity immunoglobulin gamma Fc region receptor II	Fcgr2	P08101	P08101;A0A0B4J1E6;A0A0B4J1G1;E9Q415	Fcgr2	Low affinity immunoglobulin gamma Fc region receptor II	FCGR2_MOUSE	7	77100.6	57180.4	82390.2	109203	99361.9	98774.2	95450.3	91745.6
P08103	Tyrosine-protein kinase HCK	Hck	P08103	P08103;F6UND7	Hck	Tyrosine-protein kinase HCK	HCK_MOUSE	9	28884.8	19556.1	32326.8	28492.6	30183.6	29503.5	23742.6	22209
P08113	Endoplasmin	Hsp90b1	P08113	P08113;Q3UAD6;Q3TUD6;Q3UBU0;Q8C2R2;Q8CCY5;Q91V38	Hsp90b1	Endoplasmin	ENPL_MOUSE	59	897627	736370	870697	918814	794587	741150	668506	733260
P08121	Collagen alpha-1(III) chain	Col3a1	P08121	P08121;Q3TVI5;Q3UH72;Q5DTG2;Q8BKY2;Q8BLW4;Q3TW25;Q7TT32;Q8BJU6;Q8BMR6;Q8K173	Col3a1	Collagen alpha-1(III) chain	CO3A1_MOUSE	10	27494.5	16713.2	24197	25065.8	38302.4	28709.6	23826.4	31678.5
P08122	Collagen alpha-2(IV) chain	Col4a2	P08122	P08122;B2RQQ8	Col4a2	Collagen alpha-2(IV) chain	CO4A2_MOUSE	11	578187	604892	511687	523634	529883	468237	370360	337688
P08207	Protein S100-A10	S100a10	P08207	P08207;Q3TC45;Q3UF30	S100a10	Protein S100-A10	S10AA_MOUSE	10	121313	115695	112426	122247	122972	136907	121205	128552
P08226	Apolipoprotein E	Apoe	P08226	P08226;Q3TXU4;A0A1B0GX15;G3UWN5;Q3TX45;Q3UBS0;Q4FK40;Q6GTX3	Apoe	Apolipoprotein E	APOE_MOUSE	27	283174	197067	227136	252783	378241	350481	305749	301415
P08228	Superoxide dismutase [Cu-Zn]	Sod1	P08228	P08228	Sod1	Superoxide dismutase [Cu-Zn]	SODC_MOUSE	12	1129000	1379850	1283820	1227140	1293390	1268180	1226040	1215210
P08249	Malate dehydrogenase, mitochondrial	Mdh2	P08249	P08249;A0A0G2JF23	Mdh2	Malate dehydrogenase, mitochondrial	MDHM_MOUSE	25	3443890	4624710	3887970	3683930	3483890	3173940	3455450	3743670
P08508	Low affinity immunoglobulin gamma Fc region receptor III	Fcgr3	P08508	P08508;A0A0B4J1M6;E9PUV2;Q5D5I8;Q5D5J5;Q7TMW9;Q9ES92	Fcgr3	Low affinity immunoglobulin gamma Fc region receptor III	FCGR3_MOUSE	3	73196.3	43845	66724.7	75247.6	77953.4	95950	91758.5	94436.2
P08551	Neurofilament light polypeptide	Nefl	P08551	P08551;Q05DD2	Nefl	Neurofilament light polypeptide	NFL_MOUSE	2		1013.7						1560.45
P08556	GTPase NRas	Nras	P08556	P08556;Q9D091;A0A0G2JE25;A0A0G2JGP4;Q3TMF4;Q3UCX0;Q4FJP3	Nras	GTPase NRas	RASN_MOUSE	2	13395.4	16620.9	15945.1	19882.7	20155.1	21060.5	17814.7	21661.4
P08607	C4b-binding protein	C4bpa	P08607	P08607;E9PUZ8;Q3UW06;Q80SX2	C4bpa	C4b-binding protein	C4BPA_MOUSE	10	40839.4	39545.2	37009.4	44316.4	29137.6	28053.7	38606.8	35383.6
P08752	Guanine nucleotide-binding protein G(i) subunit alpha-2	Gnai2	P08752	P08752;Q8JZT4	Gnai2	Guanine nucleotide-binding protein G(i) subunit alpha-2	GNAI2_MOUSE	19	350127	306423	308497	346284	288274	293674	303025	313038
P08775	DNA-directed RNA polymerase II subunit RPB1	Polr2a	P08775	P08775;O08847;A0A0R4J0V5;Q3TC95	Polr2a	DNA-directed RNA polymerase II subunit RPB1	RPB1_MOUSE	43	17890.9	17435	17532.1	18489.8	16898.6	17877.6	18552.5	18488.9
P08905	Lysozyme C-2	Lyz2	P08905	P08905;A0A077S2U6	Lyz2	Lysozyme C-2	LYZ2_MOUSE	2	276698	132168	385307	509922	889400	1088770	1075710	895565
P09025	Homeobox protein Hox-C8	Hoxb8	P09025;P09632	P09025;P09632;A2A9Z8;F6W0B3;Q8BNV9;Q8BNX6;Q8BQA3	Hoxb8;Hoxc8	Homeobox protein Hox-C8	HXB8_MOUSE;HXC8_MOUSE	2	3084.18	5559.14	3228.23	4274.99	5418	3200.46	4419.28	5715.35
P09036	Serine protease inhibitor Kazal-type 1	Spink1	P09036	P09036	Spink1	Serine protease inhibitor Kazal-type 1	ISK1_MOUSE	4	27326.2	24512.1	37238.9	34037.7	66625.1	62742.4	60313.9	59531.5
P09055	Integrin beta-1	Itgb1	P09055	P09055;Q8BUD1	Itgb1	Integrin beta-1	ITB1_MOUSE	28	250100	271571	265117	263306	244672	248546	237520	254938
P09056	Leukemia inhibitory factor	Lif	P09056	P09056;F8WH42;Q3U1H5	Lif	Leukemia inhibitory factor	LIF_MOUSE	3	2764.27	1867.87	1918.93	2042.09	2722.2	2508.44	3613.66	4746.39
P09103	Protein disulfide-isomerase	P4hb	P09103	P09103;Q3TF72;Q3TGS0;Q3THC3;Q3TIM0;Q3TT76;Q3TWE3;Q3U738;Q3UA23;Q3UBY9;Q3UDR2;Q3UJA8;Q3URP6	P4hb	Protein disulfide-isomerase	PDIA1_MOUSE	41	705706	615922	674129	734911	675168	654391	605232	615096
P09242	Alkaline phosphatase, tissue-nonspecific isozyme	Alpl	P09242	B7XGA6;E9Q7P8;P09242;Q3TJD3;Q3TQ02;Q8JZS4;Q9EQ79	Alpl	Alkaline phosphatase, tissue-nonspecific isozyme	PPBT_MOUSE	26	68973.7	77704.6	56673.9	43724.3	117429	118767	118387	92884.3
P09405	Nucleolin	Ncl	P09405	P09405;Q3TL52;Q3TT41;Q8CD23;Q8CE30;A0A087WRM5;Q3TGR3;Q9CT46	Ncl	Nucleolin	NUCL_MOUSE	35	190110	172227	187296	206016	229069	222783	235759	223672
P09411	Phosphoglycerate kinase 1	Pgk1	P09411	P09411;S4R2M7	Pgk1	Phosphoglycerate kinase 1	PGK1_MOUSE	49	517937	651117	607843	584500	604477	608562	603866	591488
P09450	Transcription factor JunB	Junb	P09450	P09450;Q3TXR4;Q3U2Y0;Q569U6	Junb	Transcription factor JunB	JUNB_MOUSE	1	4170.98	2276.29	3028.57	3967.5	3385.85	2916.15	3089.79	2536.38
P09470	Angiotensin-converting enzyme	Ace	P09470	P09470;Q3TU20;Q3U3Q7;Q5XK22;F6QCP8;Q8K233	Ace	Angiotensin-converting enzyme	ACE_MOUSE	36	97188.5	79014.8	99066	103147	127994	132979	117222	101568
P09528	Ferritin heavy chain	Fth1	P09528	P09528;A0A494BA92	Fth1	Ferritin heavy chain	FRIH_MOUSE	15	441563	454941	400501	416688	466931	492933	514920	499132
P09581	Macrophage colony-stimulating factor 1 receptor	Csf1r	P09581	P09581;Q0P635;Q3U1X4;Q3U1Y3;Q3U210;Q3U3W0;Q3UKC6;Q6NXV8;Q3U4N8	Csf1r	Macrophage colony-stimulating factor 1 receptor	CSF1R_MOUSE	12	30119.6	25362.5	27519.9	32051.1	29038.9	30610.4	32748.3	36520.5
P09671	Superoxide dismutase [Mn], mitochondrial	Sod2	P09671	P09671;Q4FJX9;A0A3B2WBF0;Q3TJA2;Q3U8W4	Sod2	Superoxide dismutase [Mn], mitochondrial	SODM_MOUSE	13	428818	600843	481182	426831	411229	396956	379070	452746
P09803	Cadherin-1	Cdh1	P09803	A0A0R4IZW5;P09803;Q4KML8	Cdh1	Cadherin-1	CADH1_MOUSE	17	93935.7	94079.9	93392.2	89266.9	95528.1	93672.6	100871	96379.1
P09813	Apolipoprotein A-II	Apoa2	P09813	P09813;A7YL62	Apoa2	Apolipoprotein A-II	APOA2_MOUSE	3	44989.4	45961.6	55796.1	54789.5	132174	144265	175713	178199
P09922	Interferon-induced GTP-binding protein Mx1	Mx1	P09922	P09922;A0A1D8DGT1;A0A991ELC8;A0A991EPJ1;B2ZCP5;M4H2J7;M4H2V4;Q4FJJ9	Mx1	Interferon-induced GTP-binding protein Mx1	MX1B_MOUSE	1			1042.08		698.656	953.81
P09925	Surfeit locus protein 1	Surf1	P09925	P09925;A0A0A6YVR9;I6L9E0;V9GXE6;Q3U3J6	Surf1	Surfeit locus protein 1	SURF1_MOUSE	6	22808.9	27472.5	27590.6	22007.6	24255.3	22395	23827.1	23734.8
P09926	Surfeit locus protein 2	Surf2	P09926	P09926;Q3TA91;Q3TM29;Q4VAF7	Surf2	Surfeit locus protein 2	SURF2_MOUSE	3	4460.03	4737.24	4828.71	3741.51	3649.86	2511.17	3201.57	2870.01
P0C090	Roquin-2	Rc3h2	P0C090	P0C090;Q4VGL6;A0A0N4SVF7;A2AVP4;H7BX02;Q148V4;Q148V5;Q3UT88;A0A668KLW6	Rc3h2	Roquin-2	RC3H2_MOUSE	2	2920.3	3300.17	1908.48	1768.59	2168.91	3298.47	2329.63	1966.47
P0C0A3	Charged multivesicular body protein 6	Chmp6	P0C0A3	P0C0A3;B1AZ39	Chmp6	Charged multivesicular body protein 6	CHMP6_MOUSE	8	19123.6	15710.5	18845.4	21670.3	21749	18588.5	15627.4	17692.4
P0C0S6	Histone H2A.Z	H2az1	P0C0S6;Q3THW5	P0C0S6;Q3THW5;B2RVP5;G3UWL7	H2az1;H2az2	Histone H2A.Z	H2AV_MOUSE;H2AZ_MOUSE	5	4679840	5139780	4860750	5039380	5211330	7016230	5984540	6894050
P0C605	cGMP-dependent protein kinase 1	Prkg1	P0C605	P0C605;Q8BND1	Prkg1	cGMP-dependent protein kinase 1	KGP1_MOUSE	14	94191.1	75411	92436	107596	118543	94357.1	101766	97510.5
P0C7N9	Proteasome assembly chaperone 4	Psmg4	P0C7N9	P0C7N9;D3Z016	Psmg4	Proteasome assembly chaperone 4	PSMG4_MOUSE	3	6604.31	4739.48	5805.64	5623.23	5202.58	5628.62	5480.49	5629.97
P0C7T6	Ataxin-1-like	Atxn1l	P0C7T6	P0C7T6	Atxn1l	Ataxin-1-like	ATX1L_MOUSE	3	9344.95	9157.33	11637	10907.2	8909.9	9941.28	10842.3	10357.3
P0C872	Bifunctional peptidase and (3S)-lysyl hydroxylase Jmjd7	Jmjd7	P0C872	P0C872;F6YGA3	Jmjd7	Bifunctional peptidase and (3S)-lysyl hydroxylase Jmjd7	JMJD7_MOUSE	5	9618.4	10996.8	7763.06	8057.48	7657.22	7816.22	8361.88	6873.4
P0CW02	Lymphocyte antigen 6C1	Ly6c1	P0CW02	P0CW02;A0A087WNZ5;A0A087WRP7	Ly6c1	Lymphocyte antigen 6C1	LY6C1_MOUSE	3	8965.37	10341.7	9546.17	6805.97	15808.4	11826.7	10754.1	8789.95
P0CW03	Lymphocyte antigen 6C2	Ly6c2	P0CW03	P0CW03	Ly6c2	Lymphocyte antigen 6C2	LY6C2_MOUSE	3	2350.27	2561.78	3216.33	3068.88	4248.03	3525.72	2603.38	5182.92
P0DN34	NADH dehydrogenase [ubiquinone] 1 beta subcomplex subunit 1	Ndufb1	P0DN34	P0DN34	Ndufb1	NADH dehydrogenase [ubiquinone] 1 beta subcomplex subunit 1	NDUB1_MOUSE	4	55651.7	82868.5	83900.5	66903.6	61856.9	76800.1	81467.8	79748.4
P0DN89	Transmembrane protein 254	Tmem254	P0DN89	P0DN89;V9GX22	Tmem254	Transmembrane protein 254	TM254_MOUSE	3	9835.39	12943.7	9988.87	8555.54	12919.3	12532.3	13516.9	16081.9
P0DOV1	Interferon-activable protein 211	Ifi205a	P0DOV1;Q8CGE8	P0DOV1;Q8CGE8;A0A1Z3MI21;C6EQG6	Ifi205a;Ifi211	Interferon-activable protein 211	IFI5A_MOUSE;IFI5B_MOUSE	6	11482.2	11427.9	13630	13589.1	17384.6	15322.5	13555.5	11267.4
P0DOV2	Interferon-activable protein 204	Ifi204	P0DOV2	P0DOV2;A0A1Z3MI45	Ifi204	Interferon-activable protein 204	IFI4_MOUSE	23	29025.7	26295	34132	34251.8	50408.6	48582.8	37206.2	35595
P0DP28	Calmodulin-3	Calm3	P0DP28	P0DP26;P0DP27;P0DP28;Q3UKW2;A0A3Q4EHJ0	Calm3	Calmodulin-3	CALM3_MOUSE	14	667498	783083	741625	684928	739576	835950	820011	728622
P0DP59	Secreted Ly-6/uPAR domain-containing protein 2	Slurp2	P0DP59	P0DP59	Slurp2	Secreted Ly-6/uPAR domain-containing protein 2	SLUR2_MOUSE	1					2230.14	2108.29	2095.19	1070.52
P0DW87	Zinc finger TRAF-type-containing protein 1	Zftraf1	P0DW87	P0DW87;Q8BI28	Zftraf1	Zinc finger TRAF-type-containing protein 1	ZTRF1_MOUSE	3	8821.92	7723.77	8175.06	6025	10100.7	10906.8	8993.69	8066.74
P10107	Annexin A1	Anxa1	P10107	P10107;Q4FJV4;A0A494BBD8;B7STB7;Q3U5N9;Q3US43;Q4FK88	Anxa1	Annexin A1	ANXA1_MOUSE	33	189644	143009	181622	226201	190113	214233	200302	255147
P10126	Elongation factor 1-alpha 1	Eef1a1	P10126	P10126;Q3TII3;Q3UA81;Q3UZQ3;Q58E64;D3YZ68;D3Z3I8	Eef1a1	Elongation factor 1-alpha 1	EF1A1_MOUSE	29	1105450	1015120	1023050	1049040	1117420	1033220	1049460	1067350
P10166	Protein L-Myc	Mycl	P10166	P10166;Q3UIE0	Mycl	Protein L-Myc	MYCL_MOUSE	1	70190.3	55366	67081.4	55214.2	58370.8	74159.5	59470	57765.9
P10287	Cadherin-3	Cdh3	P10287	P10287;Q8BRE1;Q80VY6	Cdh3	Cadherin-3	CADH3_MOUSE	9	7970.19	5779.44	5950.76	7458.33	6336.9	5966.55	7279.61	6482.33
P10493	Nidogen-1	Nid1	P10493	P10493	Nid1	Nidogen-1	NID1_MOUSE	58	264858	270689	244070	243263	199021	190693	176392	197638
P10518	Delta-aminolevulinic acid dehydratase	Alad	P10518	P10518;O89061;Q9DD05	Alad	Delta-aminolevulinic acid dehydratase	HEM2_MOUSE	15	40345	53614.4	42755.3	41694.1	39780.5	45404.6	43765	44494.8
P10605	Cathepsin B	Ctsb	P10605	P10605;Q3TC17;Q3TVS6	Ctsb	Cathepsin B	CATB_MOUSE	30	702212	586989	564919	547578	2366350	2583570	2245350	2163860
P10630	Eukaryotic initiation factor 4A-II	Eif4a2	P10630	P10630;Q52KC1;A0A338P6X5;E9Q561;Q8BTU6	Eif4a2	Eukaryotic initiation factor 4A-II	IF4A2_MOUSE	10	44503	49645.6	49281.4	44423.9	42910.9	46268.9	45042.5	40079.9
P10637	Microtubule-associated protein tau	Mapt	P10637	P10637;A0A0A0MQC7;A2A5Y6;B1AQW2;Q3UH19;Q547J4	Mapt	Microtubule-associated protein tau	TAU_MOUSE	9	43404.1	44164.5	44582.4	37240.4	85936.2	75650.7	79543.8	77577.3
P10639	Thioredoxin	Txn	P10639	P10639	Txn	Thioredoxin	THIO_MOUSE	13	1014830	1136370	1038740	1000590	1081500	1085610	1088360	1047180
P10648	Glutathione S-transferase A2	Gsta1	P10648;P13745	P10648;P13745;D3YZV3;D3Z6A6	Gsta1;Gsta2	Glutathione S-transferase A2	GSTA1_MOUSE;GSTA2_MOUSE	2	29825.2	60928.6	40694.8	23264.8	36937.5	44296.3	51938.1	35680.2
P10649	Glutathione S-transferase Mu 1	Gstm1	P10649	P10649;A2AE89;Q6PJ91	Gstm1	Glutathione S-transferase Mu 1	GSTM1_MOUSE	36	1189350	1277060	1212880	1129270	1157730	1147400	1056310	1110790
P10711	Transcription elongation factor A protein 1	Tcea1	P10711	P10711;E9PYD5;Q3UPE0;Q3UWX7	Tcea1	Transcription elongation factor A protein 1	TCEA1_MOUSE	15	24780.9	22725.9	22609.2	24117.7	24542.2	23723.6	25350.6	25362.4
P10761	Zona pellucida sperm-binding protein 3	Zp3	P10761	P10761;Q3V2B5;F6VD35;Q8VHA1;Q8VHA2;Q8VHA3;Q8VHA4	Zp3	Zona pellucida sperm-binding protein 3	ZP3_MOUSE	1	2244.1	1790.64	1352.16	1347.84	1895.47		891.23	1177.02
P10810	Monocyte differentiation antigen CD14	Cd14	P10810	P10810;Q4FJP7;Q3U6A3;Q3UB18;Q3UE54;Q91V69;Q91VC2;Q91VD3;Q920X8;Q920X9	Cd14	Monocyte differentiation antigen CD14	CD14_MOUSE	11	88433.4	72932.5	94590.6	104822	110009	106521	94475	97040.8
P10833	Ras-related protein R-Ras	Rras	P10833	P10833;Q3U1N3	Rras	Ras-related protein R-Ras	RRAS_MOUSE	11	74209.2	77082.4	72321.3	79346.6	72833.1	65099.5	73723.4	70565.2
P10852	Amino acid transporter heavy chain SLC3A2	Slc3a2	P10852	P10852;Q3TN39;Q8BTJ9;A0A0U1RPK4;Q3TIP1;Q3U144;Q60849	Slc3a2	Amino acid transporter heavy chain SLC3A2	4F2_MOUSE	17	148279	232035	204824	173854	151068	180363	174826	186702
P10854	Histone H2B type 1-M	H2bc14	P10854	P10854;Q64478;Q64525;Q6ZWY9;B2RTK3	H2bc14	Histone H2B type 1-M	H2B1M_MOUSE	1	1311.07	952.365	831.765	1327.83	791.433	778.665	692.368	730.266
P10889	C-X-C motif chemokine 2	Cxcl2	P10889	P10889;Q3U1J5;Q3U1L9;Q3UCP1	Cxcl2	C-X-C motif chemokine 2	CXCL2_MOUSE	1	3228.85	3264.28			3123.52	3821.35	2622.43	5157.11
P10922	Histone H1.0	H1-0	P10922	P10922;Q3U4Y0;Q8C1Y3	H1-0	Histone H1.0	H10_MOUSE	7	651300	704793	638499	607055	559554	611920	600331	632983
P10923	Osteopontin	Spp1	P10923	P10923;D3Z4N2;D3Z513;F8WIP8;Q3TLP1;Q3TND2;Q3UBR1;Q3UZY3;Q547B5;Q66JX3	Spp1	Osteopontin	OSTP_MOUSE	8	59872.1	37148.8	42675.9	60601.8	140829	106008	112592	94265.1
P11031	Activated RNA polymerase II transcriptional coactivator p15	Sub1	P11031	P11031	Sub1	Activated RNA polymerase II transcriptional coactivator p15	TCP4_MOUSE	11	52873.9	45194	49592.3	50801	42475.9	49687.5	49440.9	50597.5
P11032	Granzyme A	Gzma	P11032	P11032;Q3U0N0;Q3UK79	Gzma	Granzyme A	GRAA_MOUSE	1		672.916	965.996		2147.23	2662.81	1533.37	2970.15
P11087	Collagen alpha-1(I) chain	Col1a1	P11087	P11087;Q60785;Q99LL6	Col1a1	Collagen alpha-1(I) chain	CO1A1_MOUSE	21	1493450	1091130	1261740	1654730	1860870	1860820	1591430	1617090
P11103	Poly [ADP-ribose] polymerase 1	Parp1	P11103	P11103;Q921K2;Q3TF18;Q3TIV3;Q3TM68;Q3TX36;Q3U868;Q3UJ03;Q3UX06	Parp1	Poly [ADP-ribose] polymerase 1	PARP1_MOUSE	30	42202.6	38307.9	40690.2	45151.3	43377.9	44102	45371.8	45105.3
P11152	Lipoprotein lipase	Lpl	P11152	P11152;Q3U5U0;Q3U6S8;Q3U715;Q3U784;Q3U841;Q3UAX2;Q3UB54;Q3UB98;Q3UBE9;Q3UC44;Q3UC81;Q3UCD4;Q3UCH4;Q3UCZ2;Q4FJQ8;Q8C562	Lpl	Lipoprotein lipase	LIPL_MOUSE	4	5690.78	5096.31	4626.22	5429.8	9651.45	7353.7	6758.21	7059.21
P11214	Tissue-type plasminogen activator	Plat	P11214	P11214	Plat	Tissue-type plasminogen activator	TPA_MOUSE	12	19690.7	13487.1	14869.9	13343.5	22535.3	18900.3	19499.3	21411.6
P11247	Myeloperoxidase	Mpo	P11247	P11247;Q571G0;Q7TMS4;Q6RFG4	Mpo	Myeloperoxidase	PERM_MOUSE	34	123651	86526.4	107895	127834	87015.1	116180	88746.5	201407
P11276	Fibronectin	Fn1	P11276	P11276;A0A087WR50;A0A087WS56;A0A087WSN6;B7ZNJ1;B9EHT6;Q3TBB4;Q3TCF1;Q3TCL7;Q3UGY5;Q3UH17;Q3UHL6	Fn1	Fibronectin	FINC_MOUSE	90	390366	274097	357519	366906	400379	343193	316717	340564
P11352	Glutathione peroxidase 1	Gpx1	P11352	P11352;A0A0A6YVV2;A0A0A6YY34	Gpx1	Glutathione peroxidase 1	GPX1_MOUSE	19	852158	1030580	916395	838088	794120	922391	939984	1010230
P11404	Fatty acid-binding protein, heart	Fabp3	P11404	P11404;Q5EBJ0	Fabp3	Fatty acid-binding protein, heart	FABPH_MOUSE	11	164770	364173	238812	214398	226056	276347	292567	391057
P11438	Lysosome-associated membrane glycoprotein 1	Lamp1	P11438	P11438;Q3TA96;Q3TX84;Q8VH34;Q922T9;Q9DC13	Lamp1	Lysosome-associated membrane glycoprotein 1	LAMP1_MOUSE	8	81989.3	68793.6	74746.4	70310.4	153951	142865	147552	137800
P11440	Cyclin-dependent kinase 1	Cdk1	P11440	P11440;D3Z2T9;Q8R4A4;Q99JW7	Cdk1	Cyclin-dependent kinase 1	CDK1_MOUSE	2	4405.35	2770.86	3558.27	3626.86	5203.66	2444.57	2194.2	3553.23
P11499	Heat shock protein HSP 90-beta	Hsp90ab1	P11499	P11499;Q71LX8;E9Q3D6;Q811H6	Hsp90ab1	Heat shock protein HSP 90-beta	HS90B_MOUSE	36	1532430	1196910	1445420	1622160	1352960	1213450	1164750	1171270
P11531	Dystrophin	Dmd	P11531	P11531;A0A668KLA2;Q3TWL4;Q5U476;A0A023ZT56;A0A023ZTV5;A0A1Q1NN66;A0A1Q1PRS2;A0A1Q1PRS4;A0A1Q1PRS6;A0A1Q1PRS9;A0A1Q1PRT9;A2A9Z1;A2A9Z2;C5I8Q2;Q8BHM1	Dmd	Dystrophin	DMD_MOUSE	10	22721.9	25428.5	22906.8	28171.1	22827	20414.5	21244.4	25285.5
P11589	Major urinary protein 2	Mup2	P11589	P11589;A2BIN1;Q4FZE8	Mup2	Major urinary protein 2	MUP2_MOUSE	2	284243	162081	343241	463362	713043	512701	480914	426992
P11590	Major urinary protein 4	Mup4	P11590	P11590;A2ANT5	Mup4	Major urinary protein 4	MUP4_MOUSE	1	3111.64	5237.77	5362.36		4105.53		3163.31
P11609	Antigen-presenting glycoprotein CD1d1	Cd1d1	P11609	P11609;A0A0R4J090;B9VQY2;E9Q395;Q7TMK5	Cd1d1	Antigen-presenting glycoprotein CD1d1	CD1D1_MOUSE	3	8427.34	5620.31	6626.25	7666.45	9851.33	10694	9629.9	9953.93
P11627	Neural cell adhesion molecule L1	L1cam	P11627	P11627;A2AFG7;A2AFG8;Q6PGJ3;F6UIL7	L1cam	Neural cell adhesion molecule L1	L1CAM_MOUSE	15	24118.1	25754.1	22041.2	24076.1	24070.1	25590.7	25666	28816.3
P11672	Neutrophil gelatinase-associated lipocalin	Lcn2	P11672	P11672;A0A0A6YW77;Q60842	Lcn2	Neutrophil gelatinase-associated lipocalin	NGAL_MOUSE	12	812832	564208	644212	766718	1381130	1315370	1182300	1723070
P11679	Keratin, type II cytoskeletal 8	Krt8	P11679	P11679	Krt8	Keratin, type II cytoskeletal 8	K2C8_MOUSE	59	619168	494890	530933	574456	647649	702135	657850	592797
P11680	Properdin	Cfp	P11680	P11680;A2AE15	Cfp	Properdin	PROP_MOUSE	8	17087.2	15965.2	15321.2	17181.8	11281.9	12683.7	11167.5	14609.1
P11688	Integrin alpha-5	Itga5	P11688	P11688;Q80YP5	Itga5	Integrin alpha-5	ITA5_MOUSE	21	30060.7	26789.8	29897.5	32313.8	32351.7	33669.5	32223.4	33353.9
P11714	Cytochrome P450 2D9	Cyp2d9	P11714	P11714;A0A2R8VHS2;B7ZP10;Q3UNW2;Q8BVD2	Cyp2d9	Cytochrome P450 2D9	CP2D9_MOUSE	8	12141.6	25694.4	11677.1	8459.49	7923.63	9896.88	11781.6	10827.5
P11725	Ornithine transcarbamylase, mitochondrial	Otc	P11725	P11725;Q543H3;Q8R1A8	Otc	Ornithine transcarbamylase, mitochondrial	OTC_MOUSE	1	26412.3	26602.7	33161.8	30334	29448.4	27298	28211.6	33054.8
P11798	Calcium/calmodulin-dependent protein kinase type II subunit alpha	Camk2a	P11798	P11798;F8WIS9;Q80TN1;F8WHB5	Camk2a	Calcium/calmodulin-dependent protein kinase type II subunit alpha	KCC2A_MOUSE	4	1393.2		4188.81	2038.72	1647.25			6459.85
P11835	Integrin beta-2	Itgb2	P11835	P11835;Q542I8;M0QWA7	Itgb2	Integrin beta-2	ITB2_MOUSE	34	134244	97395.8	123118	141593	113645	128650	108449	139897
P11859	Angiotensinogen	Agt	P11859	P11859;Q3UTR7;A0A5F8MPW1;Q8VCN0	Agt	Angiotensinogen	ANGT_MOUSE	13	63252.2	41848.5	62222.2	50968.1	106877	97835.4	100375	97889
P11862	Growth arrest-specific protein 2	Gas2	P11862	P11862;Q9D699;D3Z503	Gas2	Growth arrest-specific protein 2	GAS2_MOUSE	11	14855.8	20259.2	17987.1	15765.9	12315	10195.4	10665.9	10771.9
P11881	Inositol 1,4,5-trisphosphate-gated calcium channel ITPR1	Itpr1	P11881	P11881;Q9Z329;Q3UVA1;Q8C0J8;Q8C7X9;B2KF89	Itpr1	Inositol 1,4,5-trisphosphate-gated calcium channel ITPR1	ITPR1_MOUSE	81	40289.3	45213.2	41879.6	38301	44185.3	44303.2	46698.4	45847.4
P11928	2'-5'-oligoadenylate synthase 1A	Oas1a	P11928	P11928	Oas1a	2'-5'-oligoadenylate synthase 1A	OAS1A_MOUSE	10	11359.7	9831.91	13724.8	14570.8	26387.3	18471.1	10925.4	10219.9
P11930	Acyl-coenzyme A diphosphatase NUDT19	Nudt19	P11930	P11930	Nudt19	Acyl-coenzyme A diphosphatase NUDT19	NUD19_MOUSE	14	273879	414319	414701	311642	246681	230522	205514	196412
P11983	T-complex protein 1 subunit alpha	Tcp1	P11983	P11983	Tcp1	T-complex protein 1 subunit alpha	TCPA_MOUSE	42	183755	156745	172608	172261	172352	173385	175727	179321
P12023	Amyloid-beta precursor protein	App	P12023	P12023;A0A2I3BPT1;A0A2I3BQZ9;Q3TWF3;Q3TXI9;Q53ZT3;A0A2I3BR03;Q3TVS1	App	Amyloid-beta precursor protein	A4_MOUSE	24	57611.8	55495.2	45766	56783.9	91834.5	71523.1	75459.4	70189.9
P12025	Midkine	Mdk	P12025	P12025;Q2LEK6;Q8BN87	Mdk	Midkine	MK_MOUSE	4	4113.93	4067.91	5750.98	5632.27	5094.53	3375.53	4618.27	4485.44
P12032	Metalloproteinase inhibitor 1	Timp1	P12032	P12032;Q6GXA9	Timp1	Metalloproteinase inhibitor 1	TIMP1_MOUSE	3	7591.35	5088.17	6489.99	10377.4	9791.63	8383.91	8355.92	9389.1
P12246	Serum amyloid P-component	Apcs	P12246	P12246;Q4JFI8	Apcs	Serum amyloid P-component	SAMP_MOUSE	5	32074.6	25058.7	31442.3	35662.3	23203.7	25996.5	25523.1	44661.8
P12265	Beta-glucuronidase	Gusb	P12265	P12265;Q3TW82;D3YY48;Q8BPE3;Q8VEM0;Q99KJ6	Gusb	Beta-glucuronidase	BGLR_MOUSE	22	168633	114492	133785	144786	230377	279858	287577	260415
P12367	cAMP-dependent protein kinase type II-alpha regulatory subunit	Prkar2a	P12367	P12367;Q8K1M3;A0A0A6YX73;A0A0A6YY28	Prkar2a	cAMP-dependent protein kinase type II-alpha regulatory subunit	KAP2_MOUSE	18	26579.3	30532.1	28427.1	27330.9	27477.8	28602.3	29966.8	32275.7
P12382	ATP-dependent 6-phosphofructokinase, liver type	Pfkl	P12382	P12382;Q8CD98	Pfkl	ATP-dependent 6-phosphofructokinase, liver type	PFKAL_MOUSE	27	66248.4	70310	74453.5	67060	60266.8	64690.4	65208	67316
P12399	Protein CTLA-2-alpha	Ctla2a	P12399	P12399	Ctla2a	Protein CTLA-2-alpha	CTL2A_MOUSE	3	9411.64	6597.12	6929.58	8444.02	24584.8	24587.1	16638.3	22888
P12658	Calbindin	Calb1	P12658	P12658;Q8C5H2;Q8CEF3	Calb1	Calbindin	CALB1_MOUSE	21	131490	171567	174896	171517	126020	110909	123236	131813
P12710	Fatty acid-binding protein, liver	Fabp1	P12710	P12710;Q3V2F7	Fabp1	Fatty acid-binding protein, liver	FABPL_MOUSE	4	11964.9	15994.1	7993.63	16259.1	8359.98	9594.63	9813.05	11148.4
P12787	Cytochrome c oxidase subunit 5A, mitochondrial	Cox5a	P12787	P12787	Cox5a	Cytochrome c oxidase subunit 5A, mitochondrial	COX5A_MOUSE	12	1135040	1341000	1191340	1158080	1100770	1097560	1049750	1069840
P12804	Fibroleukin	Fgl2	P12804	P12804;Q544K3	Fgl2	Fibroleukin	FGL2_MOUSE	5	6666.2	5926.78	8459.15	7530.78	12664.8	9948.76	9764.23	8518.37
P12815	Programmed cell death protein 6	Pdcd6	P12815	P12815;Q3UGE5;Q8C5M4	Pdcd6	Programmed cell death protein 6	PDCD6_MOUSE	10	99449.1	116111	101039	105946	116680	115990	120028	119236
P12960	Contactin-1	Cntn1	P12960	P12960	Cntn1	Contactin-1	CNTN1_MOUSE	3	4493.65	2950.65	3078.5	4623.11	3705.01	4668.72	2836.59	8547.3
P12970	Large ribosomal subunit protein eL8	Rpl7a	P12970	P12970;Q58ET1;Q5EBG5;Q6P1A9;Q80UT7	Rpl7a	Large ribosomal subunit protein eL8	RL7A_MOUSE	17	524313	497447	546020	576758	519642	504743	515165	513782
P13020	Gelsolin	Gsn	P13020	P13020;Q6PAC1;Q3TGJ9;Q3U9Q8;Q3UCW8	Gsn	Gelsolin	GELS_MOUSE	37	762485	789422	775028	846677	761918	837533	780379	847611
P13379	T-cell surface glycoprotein CD5	Cd5	P13379	P13379;A0A494BB49;Q3UP78;Q8C9H0;Q91X69;Q9ER20	Cd5	T-cell surface glycoprotein CD5	CD5_MOUSE	5	16728.6	13935.9	15506.7	18418.6	12234.2	13962.9	11976.5	13453.8
P13405	Retinoblastoma-associated protein	Rb1	P13405	P13405;Q3URY9;Q9CT40	Rb1	Retinoblastoma-associated protein	RB_MOUSE	1	7052.1	5411.88	7000.01	7559.18	7681.66	6398.47	5324.93	4907.14
P13439	Uridine 5'-monophosphate synthase	Umps	P13439	P13439;Q3TVV7;Q544K9	Umps	Uridine 5'-monophosphate synthase	UMPS_MOUSE	25	94770.6	85836.9	90025.5	88786.8	96553.8	97108.4	93112.9	93287.6
P13516	Acyl-CoA desaturase 1	Scd1	P13516	P13516;Q547C4	Scd1	Acyl-CoA desaturase 1	ACOD1_MOUSE	4	339641	389123	401578	406434	400270	267170	395165	312981
P13595	Neural cell adhesion molecule 1	Ncam1	P13595	P13595;A0A0A6YY47;A0A0A6YY91;E9QB01;A0A0A6YWU2;E9Q589;O08909	Ncam1	Neural cell adhesion molecule 1	NCAM1_MOUSE	24	37998.4	30126.3	32452.7	36087.8	38200.3	41105.3	38888.6	46540.3
P13597	Intercellular adhesion molecule 1	Icam1	P13597	P13597;Q3U8M7;Q3TB10;Q3TB21;Q3THH5;Q3U7Q9;Q3U7T2;Q3UAU5;Q3UDJ5;Q3UE52;Q4FK06;Q922B3;Q3UDC5	Icam1	Intercellular adhesion molecule 1	ICAM1_MOUSE	13	41638.7	42408.1	47424.5	46205.3	46026.2	45343.6	49468.9	50755.6
P13634	Carbonic anhydrase 1	Ca1	P13634	P13634;D3YYQ4	Ca1	Carbonic anhydrase 1	CAH1_MOUSE	8	30819.7	67577.3	42308.4	42450.6	20222.1	36553.6	37016.2	52422.5
P13707	Glycerol-3-phosphate dehydrogenase [NAD(+)], cytoplasmic	Gpd1	P13707	P13707;E0CXN5	Gpd1	Glycerol-3-phosphate dehydrogenase [NAD(+)], cytoplasmic	GPDA_MOUSE	37	312683	412867	368372	317049	315362	343336	319517	299247
P13808	Anion exchange protein 2	Slc4a2	P13808	P13808;A0A0R4J101;A0A0R4J1K4;A0A0R4J1K9;Q3UGM4;Q3UKP0;Q7TPS4;D3YUF1;D3Z5G3	Slc4a2	Anion exchange protein 2	B3A2_MOUSE	6	5962.56	5196.75	5686.04	5019.56	6175.45	4795.38	6774.22	5032.46
P13864	DNA (cytosine-5)-methyltransferase 1	Dnmt1	P13864	P13864;Q3UHZ3;Q7TSJ0;Q3UPE8	Dnmt1	DNA (cytosine-5)-methyltransferase 1	DNMT1_MOUSE	23	17473.6	14038.9	15170.1	18175.2	19676.7	15715.1	14177.3	14202.3
P14069	Protein S100-A6	S100a6	P14069	P14069;Q545I9	S100a6	Protein S100-A6	S10A6_MOUSE	5	431958	378710	404163	436443	423623	449551	418562	439969
P14094	Sodium/potassium-transporting ATPase subunit beta-1	Atp1b1	P14094	P14094;Q545P0;Q3TRA6;Q3TSQ1;Q3TV47	Atp1b1	Sodium/potassium-transporting ATPase subunit beta-1	AT1B1_MOUSE	13	1091380	1453920	1301800	1218060	1026920	1082830	1108370	1105050
P14106	Complement C1q subcomponent subunit B	C1qb	P14106	P14106;A0A3B0ITG8;Q3U6I5	C1qb	Complement C1q subcomponent subunit B	C1QB_MOUSE	5	34587.4	25559.6	25062.5	24171.5	33048.1	34976.9	38460.7	30272.8
P14115	Large ribosomal subunit protein uL15	Rpl27a	P14115	P14115	Rpl27a	Large ribosomal subunit protein uL15	RL27A_MOUSE	5	379469	364186	392195	389408	391088	351624	358355	369981
P14131	Small ribosomal subunit protein uS9	Rps16	P14131	P14131;A4FUS1;Q5CZY9;Q641N3	Rps16	Small ribosomal subunit protein uS9	RS16_MOUSE	18	154091	157580	165114	155824	168957	170963	174158	200584
P14148	Large ribosomal subunit protein uL30	Rpl7	P14148	P14148;F6XI62;Q3TK73;Q3UBI6;Q5M9N8	Rpl7	Large ribosomal subunit protein uL30	RL7_MOUSE	21	139931	156205	183430	146448	148555	153917	158956	172449
P14152	Malate dehydrogenase, cytoplasmic	Mdh1	P14152	P14152;A0A5F8MPN8;B1ATQ3	Mdh1	Malate dehydrogenase, cytoplasmic	MDHC_MOUSE	24	1005300	1395150	1178740	1083680	1078060	1047100	1098820	1086640
P14206	Small ribosomal subunit protein uS2	Rpsa	P14206	P14206;B2CY77;A0A1L1SRW0	Rpsa	Small ribosomal subunit protein uS2	RSSA_MOUSE	12	572074	578629	607210	598813	625286	568911	609289	600533
P14211	Calreticulin	Calr	P14211	B2MWM9;P14211;Q3UWP8	Calr	Calreticulin	CALR_MOUSE	18	886717	811824	935888	954608	863842	847910	783528	801347
P14231	Sodium/potassium-transporting ATPase subunit beta-2	Atp1b2	P14231	P14231;Q3UR55	Atp1b2	Sodium/potassium-transporting ATPase subunit beta-2	AT1B2_MOUSE	4	5505.02	4864.47	6902.17	7729.53	6158.74	6402.14	6474.21	9018.8
P14234	Tyrosine-protein kinase Fgr	Fgr	P14234	P14234;Q6GTF2	Fgr	Tyrosine-protein kinase Fgr	FGR_MOUSE	8	6702.07	5595.89	6847.6	7620.75	6723.24	5634.5	5943.63	6018.35
P14246	Solute carrier family 2, facilitated glucose transporter member 2	Slc2a2	P14246	P14246	Slc2a2	Solute carrier family 2, facilitated glucose transporter member 2	GTR2_MOUSE	6	53155.3	82767.2	79035.4	72238.8	49945.2	46734.6	44754.7	41652.5
P14429	H-2 class I histocompatibility antigen, Q7 alpha chain	H2-Q7	P14429	P14429;P14431;E9PWT4;L7N260;Q52PG7	H2-Q7	H-2 class I histocompatibility antigen, Q7 alpha chain	HA17_MOUSE	4	11814.5	11852.3	16767.8	20034.8	26874.1	21397.4	21038.8	19214.8
P14430	H-2 class I histocompatibility antigen, Q8 alpha chain	H2-Q8	P14430	P14430;P79567;P79568;Q0WXH7;Q31152;Q31199;Q3UWA5;Q8HWB2;Q95H92;A0A2Z4SXC7;A0A2Z4SZ33	H2-Q8	H-2 class I histocompatibility antigen, Q8 alpha chain	HA18_MOUSE	1	7644.25	11807.1	10502.3	11429.4	17300.3	11274.9	17070.6	13736.4
P14434	H-2 class II histocompatibility antigen, A-B alpha chain	H2-Aa	P14434;P14438	P01910;P04228;P14434;P14435;P14436;P14437;P14438;P23150;A0A068BER6;A0A1D8M9B5;Q3TB90;Q549Q3;Q6SR48;Q860C1;Q9TQ71;Q9TQ72;A0A068BD71;A0A2Z4SWU0;A0A2Z4SX34;A0A2Z4SXU2;A0A2Z4SYD2;A0A2Z4T0Z1;A0A2Z4T1Y2;A0A2Z4T2Z9;G3UWR9	H2-Aa	H-2 class II histocompatibility antigen, A-B alpha chain	HA2B_MOUSE;HA2U_MOUSE	5	167733	137299	202742	190609	530797	517079	515452	441450
P14483	H-2 class II histocompatibility antigen, A beta chain	H2-Ab1	P14483	P01921;P06343;P14483;P18469;A0A494B9G5;O19455;O19470;Q31134;Q3TD53;Q7YQ01;Q7YQ02;Q8BPA0;Q95I79;Q9TP17;A0A2Z4SWU3;A0A2Z4SWW7;A0A2Z4SX27;A0A2Z4SXA1;A0A2Z4SYF2;A0A2Z4SYJ8;A0A2Z4T122;A0A2Z4T159;A0A2Z4T1Z3;A0A2Z4T307;A0A2Z4T325;E5FDC9;E5FDD0;O02895;O02899;O19461;Q31182;Q5XQJ1;Q5XQJ5;Q5XQJ8;Q5XQK9	H2-Ab1	H-2 class II histocompatibility antigen, A beta chain	HB2A_MOUSE	20	124389	96198.2	128601	136374	385359	364435	373734	304782
P14576	Signal recognition particle subunit SRP54	Srp54	P14576	P14576;E9PXC0;Q8C1Y6;Q99JZ9	Srp54	Signal recognition particle subunit SRP54	SRP54_MOUSE	17	22654.2	22208.4	21196.3	26981.8	23464.4	21095.1	21590.9	19854
P14602	Heat shock protein beta-1	Hspb1	P14602	P14602;Q545F4;D3YZ06	Hspb1	Heat shock protein beta-1	HSPB1_MOUSE	13	124484	99552.5	96453.9	86289.6	120256	113479	107351	101276
P14685	26S proteasome non-ATPase regulatory subunit 3	Psmd3	P14685	P14685;Q3U5M8;Q3ULJ5;Q8BK46;F7B7L8	Psmd3	26S proteasome non-ATPase regulatory subunit 3	PSMD3_MOUSE	33	75832.5	67529.3	75492.4	72242	78077	81875.4	78875.3	83092.5
P14733	Lamin-B1	Lmnb1	P14733	P14733;Q8C553	Lmnb1	Lamin-B1	LMNB1_MOUSE	51	250432	234820	246888	284288	246177	276610	285474	288637
P14753	Erythropoietin receptor	Epor	P14753	P14753;Q3UTV9	Epor	Erythropoietin receptor	EPOR_MOUSE	1	8730.11	10140.5	7135.39	9116.97	19174	12009.3	16684	17923.6
P14824	Annexin A6	Anxa6	P14824	P14824;F8WIT2;Q3TUI1;Q3UDK4;Q3UI56;Q3V2Z4;Q8CEX0;Q99JX6	Anxa6	Annexin A6	ANXA6_MOUSE	58	484928	423583	482480	530504	521890	540400	524511	558585
P14847	C-reactive protein	Crp	P14847	P14847;I6L966;Q542I3	Crp	C-reactive protein	CRP_MOUSE	4	7767.81	4741.07	4777.96	5288.81	7046.41	6162.95	6163.66	7056.86
P14869	Large ribosomal subunit protein uL10	Rplp0	P14869	P14869;Q5M8R8	Rplp0	Large ribosomal subunit protein uL10	RLA0_MOUSE	15	259061	200903	251573	209187	264733	251182	243945	254902
P14873	Microtubule-associated protein 1B	Map1b	P14873	P14873;B2RQQ5;Q3TZM8;Q8CAI9;Q8CFR9;A0PJ96	Map1b	Microtubule-associated protein 1B	MAP1B_MOUSE	18	18964.8	16818.4	16761.4	19348.4	16701.7	17283.5	16931.2	18850.9
P14901	Heme oxygenase 1	Hmox1	P14901	P14901;Q3U5U6;Q3U5H8	Hmox1	Heme oxygenase 1	HMOX1_MOUSE	6	13415.2	13103.7	16274.3	14865.4	16692.6	16511.3	12455.3	15513.2
P15066	Transcription factor JunD	Jund	P15066	P15066;Q52L49	Jund	Transcription factor JunD	JUND_MOUSE	2	7225.68	5923.14		8767.15	7358.97	6253.97	8090.04	7215
P15089	Mast cell carboxypeptidase A	Cpa3	P15089	P15089;Q542E3	Cpa3	Mast cell carboxypeptidase A	CBPA3_MOUSE	1	2280.96	3533.41	433.12	1080.12
P15105	Glutamine synthetase	Glul	P15105	P15105;D3YVK1	Glul	Glutamine synthetase	GLNA_MOUSE	17	131712	118583	123362	128901	141009	134091	131982	146376
P15116	Cadherin-2	Cdh2	P15116	P15116;P39038;D3YYT0;Q3UIC2;Q8BSI9	Cdh2	Cadherin-2	CADH2_MOUSE	4	4382.18	5110.07	4738.05	4326.5	4919.77	3599.72	4421.71	3408.94
P15208	Insulin receptor	Insr	P15208	P15208;M4TKR7	Insr	Insulin receptor	INSR_MOUSE	20	18901.4	27312.1	22585	20072.2	21715.2	21464.8	21426	24078.7
P15261	Interferon gamma receptor 1	Ifngr1	P15261	P15261;Q3TW49;Q3U8T2;Q540M5	Ifngr1	Interferon gamma receptor 1	INGR1_MOUSE	3	22171.1	20466.9	20389.3	24041.3	26891.7	21972.7	22745.1	27731.6
P15306	Thrombomodulin	Thbd	P15306	P15306;Q543W3;Q8BJB5	Thbd	Thrombomodulin	TRBM_MOUSE	7	17197.5	17171.4	20195.3	23262.1	24138.4	28554.2	19900.1	24637.3
P15307	Proto-oncogene c-Rel	Rel	P15307	P15307;A4QPD3	Rel	Proto-oncogene c-Rel	REL_MOUSE	5	13825.5	10825.1	11698	13045.7	13271.3	14066.3	12051.3	12888.9
P15327	Bisphosphoglycerate mutase	Bpgm	P15327	P15327;D3Z223;Q3TAQ8	Bpgm	Bisphosphoglycerate mutase	PMGE_MOUSE	10	34566.8	58459	48406	51170.2	27672.9	32813.4	34157.5	52033.1
P15331	Peripherin	Prph	P15331	P15331;G3X981;G5E846;A0A2R8VKR9;A0A2R8W6R6	Prph	Peripherin	PERI_MOUSE	4	6842.96	8890.1	8252.54	9265.76	8361.21	10723.3	7734.38	7013.46
P15379	CD44 antigen	Cd44	P15379	A2APM2;P15379;A2APM1;A2APM3;A2APM4;A2APM5;E9QKM8;Q3TLT9;Q3U468;Q3U8S1;Q3UNN2;Q80X37	Cd44	CD44 antigen	CD44_MOUSE	3	109243	70277.1	91733.9	88046.7	74040.8	82823.6	85108.6	90756.2
P15392	Cytochrome P450 2A4	Cyp2a4	P15392	P15392	Cyp2a4	Cytochrome P450 2A4	CP2A4_MOUSE	6	8526.42	22072.8	16865.7	11438.1	2860.79	3893.62	4927.35	4683.09
P15508	Spectrin beta chain, erythrocytic	Sptb	P15508	P15508;Q3UGX2;B2RX08;E9Q397;Q3UGY4	Sptb	Spectrin beta chain, erythrocytic	SPTB1_MOUSE	41	14501.4	24816.4	19383.3	22520.1	13551.7	16187.7	15932.3	21627.1
P15532	Nucleoside diphosphate kinase A	Nme1	P15532	P15532;Q5NC81;E9PZF0;Q5NC80	Nme1	Nucleoside diphosphate kinase A	NDKA_MOUSE	21	1150280	1474530	1343940	1336860	1357100	1324510	1333910	1257800
P15533	Tripartite motif-containing protein 30A	Trim30a	P15533	P15533;Q3UUN0	Trim30a	Tripartite motif-containing protein 30A	TR30A_MOUSE	2	1891.2		2172.84	3767.77	4276.04	3269.27	2284.34	2201.21
P15535	Beta-1,4-galactosyltransferase 1	B4galt1	P15535	P15535;Q3U478;B1AXY5;Q3TJS1	B4galt1	Beta-1,4-galactosyltransferase 1	B4GT1_MOUSE	3	13483.4	11612.9	11972.3	12308.6	14556.1	13043	13335.1	12396.9
P15626	Glutathione S-transferase Mu 2	Gstm2	P15626	P15626;Q8R5I6;Q7M0F4	Gstm2	Glutathione S-transferase Mu 2	GSTM2_MOUSE	22	106964	115448	102209	111336	95353.7	102500	97432.9	107564
P15655	Fibroblast growth factor 2	Fgf2	P15655	P15655;Q541T2;Q7TPG9;Q925A1;Q925A2;Q925A3	Fgf2	Fibroblast growth factor 2	FGF2_MOUSE	4	7025.97	8749.33	8285.95	10519	9467.52	6416.77	8464.23	9222.47
P15702	Leukosialin	Spn	P15702	P15702;Q544C5;A0A0U1RNN5	Spn	Leukosialin	LEUK_MOUSE	1	5741.56	3638.42	4748.15	6297.18	6413.06	7230.09	7040.51	7530.13
P15864	Histone H1.2	H1-2	P15864	P15864;Q3U292;Q3UXH2;Q5SZA3	H1-2	Histone H1.2	H12_MOUSE	6	2678620	3224760	3060630	3438130	3481830	3142750	3546440	3478710
P15920	V-type proton ATPase 116 kDa subunit a 2	Atp6v0a2	P15920	P15920	Atp6v0a2	V-type proton ATPase 116 kDa subunit a 2	VPP2_MOUSE	11	29945.1	25284.7	26248.5	29467.6	33810.5	32243.2	33873.6	35005
P15947	Kallikrein-1	Klk1	P15947	P00757;P15945;P15947;A0A0B6VSQ6;A0A1R3UCI2;A0A1R3UGK0	Klk1	Kallikrein-1	KLK1_MOUSE	11	35012	60263.7	41362.7	51083.8	51395.8	55143.2	84484.7	66529.6
P16015	Carbonic anhydrase 3	Ca3	P16015	P16015	Ca3	Carbonic anhydrase 3	CAH3_MOUSE	13	115775	46345.8	25549	43368.8	32005.7	53124.1	46272.6	42612
P16045	Galectin-1	Lgals1	P16045	P16045;A0A2R8VHJ0	Lgals1	Galectin-1	LEG1_MOUSE	13	1180530	889645	1050250	1177760	1221070	1202540	1085400	1110000
P16054	Protein kinase C epsilon type	Prkce	P16054	P16054	Prkce	Protein kinase C epsilon type	KPCE_MOUSE	1	5344.7	5661.89	4946.7	4935.53	6513.43	5909.88	5530.14	4550.34
P16056	Hepatocyte growth factor receptor	Met	P16056	F8VQL0;P16056;A4FUV6;A4FUV7;Q3TCS4	Met	Hepatocyte growth factor receptor	MET_MOUSE	10	9977.78	10613.3	9753.99	9418.23	8208.02	7929.42	9910.53	8979.96
P16092	Fibroblast growth factor receptor 1	Fgfr1	P16092	A0A0R4IZY3;E9QK53;P16092;P21803;Q03142;Q61851;E9QNJ9;Q60818;Q8CIM9;A1YYM3;A1YYM4;A1YYM5;A1YYM6;A1YYM7;A1YYM8;A1YYM9;A1YYN0;A1YYN1;A1YYN2;A1YYN5;A1YYN6;A1YYN7;A1YYN9;A1YYP0;A1YYP1;B7ZWP2;B9EKY4;D3Z5M8;E9PVU6;E9PX60;E9PX67;E9PX88;E9PX90;E9PXV8;E9Q5C2;E9Q5C3;E9Q708;E9Q7C7;E9Q7E8;E9Q7T0;F6TK14;Q3TQL1;Q3UPE1;Q61563;Q7TSI8;Q99052;A0A0J9YTQ5;A1YYN4;A1YYN8;E9Q700;E9Q7E6;Q3TJ05;Q8CBY7;F2Z480	Fgfr1	Fibroblast growth factor receptor 1	FGFR1_MOUSE	4	2305.22	3070.33	3036.92	3361.89	2269.62	2851.3	3340.45	2542.9
P16110	Galectin-3	Lgals3	P16110	P16110;Q8C253;Q3V471	Lgals3	Galectin-3	LEG3_MOUSE	18	603215	528825	570300	663402	662058	691656	632070	695456
P16125	L-lactate dehydrogenase B chain	Ldhb	P16125	P00342;P06151;P16125;A0A1B0GSX0;A0A6I8MX27;Q548Z6;Q64483;Q99K20;A0A0N4SVV8;A0A1B0GQX5;A0A1B0GSR9;A0A1B0GT41;D3YVR7;D3YZE4;D3YZQ9;D3Z7F0;Q3TCI7;Q3THB4;Q3TI99;Q3UDU4;Q564E2	Ldhb	L-lactate dehydrogenase B chain	LDHB_MOUSE	34	2112760	2502590	2197800	2078190	2287110	2291610	2397050	2425780
P16254	Signal recognition particle 14 kDa protein	Srp14	P16254	P16254;A2AUM6	Srp14	Signal recognition particle 14 kDa protein	SRP14_MOUSE	7	22330.3	18960.2	22988.4	22434.6	21061.5	21470.5	22716.5	20333.8
P16294	Coagulation factor IX	F9	P16294	P16294;A0JLY3	F9	Coagulation factor IX	FA9_MOUSE	10	26334.4	20245.1	24298.9	22814.5	19563	14891.8	21535.5	18726.9
P16301	Phosphatidylcholine-sterol acyltransferase	Lcat	P16301	P16301;Q791M3;Q9CW47	Lcat	Phosphatidylcholine-sterol acyltransferase	LCAT_MOUSE	5	7054.75	7619.2	8271.1	8583.58	4528.25	6002.46	4490.14	5424.07
P16330	2',3'-cyclic-nucleotide 3'-phosphodiesterase	Cnp	P16330	P16330;Q3TYV5;Q3TYL9	Cnp	2',3'-cyclic-nucleotide 3'-phosphodiesterase	CN37_MOUSE	17	20545.3	17256.4	20418.7	20761	20671.5	21206.5	22849	29415.5
P16331	Phenylalanine-4-hydroxylase	Pah	P16331	P16331;Q3UEH8	Pah	Phenylalanine-4-hydroxylase	PH4H_MOUSE	24	28130.3	77907.6	55697.8	37556.4	26938	24104.9	27164	29845.6
P16332	Methylmalonyl-CoA mutase, mitochondrial	Mmut	P16332	P16332;Q8VED0;A0A3B2WCT0	Mmut	Methylmalonyl-CoA mutase, mitochondrial	MUTA_MOUSE	29	70428	105004	87723	79903	68325.1	67106	70001.2	69072.9
P16382	Interleukin-4 receptor subunit alpha	Il4r	P16382	P16382;A2VCP1;Q3U905;Q3UE66;Q544A9;A0A0U1RNW1;A0A0U1RPZ6	Il4r	Interleukin-4 receptor subunit alpha	IL4RA_MOUSE	1	1900	892.035	1966.64	1251.35		2697.55		2691.81
P16406	Glutamyl aminopeptidase	Enpep	P16406	P16406;Q52JJ6;Q8CD51;Q6P3C1	Enpep	Glutamyl aminopeptidase	AMPE_MOUSE	45	129829	146800	134887	121522	158359	160377	165997	151705
P16460	Argininosuccinate synthase	Ass1	P16460	P16460;Q3UJ34;Q3UEJ7	Ass1	Argininosuccinate synthase	ASSY_MOUSE	31	750001	1369300	1127740	835550	664486	601727	628893	676314
P16546	Spectrin alpha chain, non-erythrocytic 1	Sptan1	P16546	P16546;A3KGU5;A3KGU7;A3KGU9;B2RXX6;B7ZWK3;B9EKJ1;E9Q447;Q3URW8;Q3V1V5	Sptan1	Spectrin alpha chain, non-erythrocytic 1	SPTN1_MOUSE	203	225144	261308	239575	242482	241816	239078	241289	248228
P16675	Lysosomal protective protein	Ctsa	P16675	P16675;G3X8T3;Q544R6;Q9D2D1	Ctsa	Lysosomal protective protein	PPGB_MOUSE	25	689509	762716	690800	672302	1166000	1261450	1221550	1215480
P16858	Glyceraldehyde-3-phosphate dehydrogenase	Gapdh	P16858	P16858;A0A0A0MQF6;A0A1D5RLD8;D2KHZ9;S4R1W1;S4R257	Gapdh	Glyceraldehyde-3-phosphate dehydrogenase	G3P_MOUSE	40	1684580	2047410	1931850	1743780	1662520	1702900	1757550	1805800
P16879	Tyrosine-protein kinase Fes/Fps	Fes	P16879	P16879;P70451;A0A0U1RPM2;A0A0U1RPN6	Fes	Tyrosine-protein kinase Fes/Fps	FES_MOUSE	10	7332.61	6035.57	5796.96	6434.06	6979.4	6016.17	5123	6332.48
P16882	Growth hormone receptor	Ghr	P16882	P16882;Q3UP14;Q3UNY8;Q61652;Q920Z4	Ghr	Growth hormone receptor	GHR_MOUSE	1	3909.66	2863.42	4112.75	3344.4	6417.46	3449.22	4752.92	4070.8
P17012	Zinc finger X-chromosomal protein	Zfa	P17012;P23607	P17012;A2ANX9;P23607;B1ASD1;B7ZN32;E9PUP8;F8WGY3;Q3URA1;Q7TMD0;Q7TMD1;Q7TMD8;Q7TMD9;Q7TT53;Q7TT59	Zfa;Zfx	Zinc finger X-chromosomal protein	ZFA_MOUSE;ZFX_MOUSE	2	2777.6	3496.66	1812.82	2444.26	2186.69	2092.45	2249.3	2893.56
P17047	Lysosome-associated membrane glycoprotein 2	Lamp2	P17047	P17047;Q8C5K0;Q3TWE1;Q3UIW3;Q8C876;Q9CZU7	Lamp2	Lysosome-associated membrane glycoprotein 2	LAMP2_MOUSE	8	185445	163308	164780	179561	473856	500171	478716	423418
P17095	High mobility group protein HMG-I/HMG-Y	Hmga1	P17095	P17095;A0A338P6F6;A0A338P6E8;A0A338P6G6;A0A384DV79;Q3TE85;Q3TVP0;Q566K0;A0A338P6D0	Hmga1	High mobility group protein HMG-I/HMG-Y	HMGA1_MOUSE	5	49856.4	41974.1	46533.1	47552	78257.3	76769.3	87333.1	79126.9
P17141	Zinc finger protein 37	Zfp37	P17141	P17141;A0A1Y7VJ69;A0A1Y7VJF3;A0A1Y7VLM5;A0A3B2WCF4;J3QM38;Q6P3Z4;Q8CCM5;Q8R1B1	Zfp37	Zinc finger protein 37	ZFP37_MOUSE	1	4889.19	4390.17		5171.21		3668.27	7190.34
P17156	Heat shock-related 70 kDa protein 2	Hspa2	P17156	P17156;B7U582	Hspa2	Heat shock-related 70 kDa protein 2	HSP72_MOUSE	18	49569.5	50492.7	47069.4	45161.1	49526.8	59613	58313.7	55075
P17182	Alpha-enolase	Eno1	P17182	P17182;Q5FW97;Q6PHC1	Eno1	Alpha-enolase	ENOA_MOUSE	35	1096390	1071110	1002440	1016900	1047800	1053000	1017190	1069610
P17183	Gamma-enolase	Eno2	P17183	P17183;A0A0N4SUX5;D3Z6E4;Q3UJ20;Q545V3;Q922A0	Eno2	Gamma-enolase	ENOG_MOUSE	7	369787	327250	320883	350163	324382	334657	312719	772575
P17225	Polypyrimidine tract-binding protein 1	Ptbp1	P17225	P17225;Q8BHD7;E9PZ39;Q80T07;Q8C2R5;Q8R509;E9QMW9;F7C521;F7DCW4;G3UXA6;G8JL74;Q3T984;Q3TQW3;Q3U5I2;Q3UBR5;Q5RJV5;Q6NZB8;Q8CB58;Q8K144	Ptbp1	Polypyrimidine tract-binding protein 1	PTBP1_MOUSE	16	381724	290421	290968	377102	333602	326036	362650	355898
P17426	AP-2 complex subunit alpha-1	Ap2a1	P17426	P17426	Ap2a1	AP-2 complex subunit alpha-1	AP2A1_MOUSE	33	63706.9	60461	62328.4	60231.3	64706.9	64890.3	65515	65652.6
P17427	AP-2 complex subunit alpha-2	Ap2a2	P17427	P17426;P17427;Q3U7X9;Q69ZW4;Q6PEE6	Ap2a2	AP-2 complex subunit alpha-2	AP2A2_MOUSE	48	107376	109089	113173	103857	111127	110982	111331	111849
P17433	Transcription factor PU.1	Spi1	P17433	P17433;A0AAA9WUS1;Q3U5L4	Spi1	Transcription factor PU.1	SPI1_MOUSE	1	5931.39	10297.5	9021.58	12088.4	13810.6	8436.74	9418.05	8298.92
P17439	Lysosomal acid glucosylceramidase	Gba1	P17439	P17439;A0A0G2JDK2	Gba1	Lysosomal acid glucosylceramidase	GBA1_MOUSE	17	33695.7	28839.6	31158.3	35377	58694.6	56524.3	54740.6	58820.3
P17563	Methanethiol oxidase	Selenbp1	P17563	P17563;A0A0R4J135;G3UYY2;Q63836	Selenbp1	Methanethiol oxidase	SBP1_MOUSE	48	726306	1139290	900098	765994	863714	887248	898439	910344
P17665	Cytochrome c oxidase subunit 7C, mitochondrial	Cox7c	P17665	P17665	Cox7c	Cytochrome c oxidase subunit 7C, mitochondrial	COX7C_MOUSE	2	235702	624512	332326	459103	267787	274054	215125	249591
P17710	Hexokinase-1	Hk1	P17710	P17710;G3UVV4;Q3TTB4;Q6GQU1;Q3TJE3;Q3UPC4	Hk1	Hexokinase-1	HXK1_MOUSE	57	158755	192613	174004	182205	160002	165082	178904	199660
P17717	UDP-glucuronosyltransferase 2B17	Ugt2b17	P17717	P17717;Q8K169;Q3UWB9;Q91WH2	Ugt2b17	UDP-glucuronosyltransferase 2B17	UDB17_MOUSE	3	7425.99	11509.6	15586.1	10965.4	8816.74	6695.56	5547.62	4898.51
P17742	Peptidyl-prolyl cis-trans isomerase A	Ppia	P17742	P17742;Q5SVY2;Q3TE63;Q3UAJ1	Ppia	Peptidyl-prolyl cis-trans isomerase A	PPIA_MOUSE	19	1137670	1236100	1132620	1205560	1137160	1097320	1031340	1075070
P17751	Triosephosphate isomerase	Tpi1	P17751	P17751;H7BXC3	Tpi1	Triosephosphate isomerase	TPIS_MOUSE	22	493007	655698	633190	599333	589586	594071	582644	626054
P17809	Solute carrier family 2, facilitated glucose transporter member 1	Slc2a1	P17809	P17809;Q3TD17;Q3U2J2;Q8BTM5	Slc2a1	Solute carrier family 2, facilitated glucose transporter member 1	GTR1_MOUSE	4	5468.54	9781.48	7392.48	8894.43	7566.22	8344.2	6450.57	7884.15
P17879	Heat shock 70 kDa protein 1B	Hspa1a	P17879;Q61696	P17879;Q61696;A1E2B8;O88688;Q3TAI8;Q3TU85;Q61698	Hspa1a;Hspa1b	Heat shock 70 kDa protein 1B	HS71A_MOUSE;HS71B_MOUSE	26	148214	142230	143542	140407	132900	140275	140114	149986
P17897	Lysozyme C-1	Lyz1	P17897	P08905;P17897;A0A077S2U6;A0A077S9N1	Lyz1	Lysozyme C-1	LYZ1_MOUSE	8	425031	228921	343327	337083	873143	775670	668646	622984
P17918	Proliferating cell nuclear antigen	Pcna	P17918	P17918;Q542J9;Q91ZH2;Q9CZD6	Pcna	Proliferating cell nuclear antigen	PCNA_MOUSE	13	34933.3	26534.3	34819.8	34886.7	35012.4	28833.8	26555.7	29151.2
P18052	Receptor-type tyrosine-protein phosphatase alpha	Ptpra	P18052	P18052;Q91V35	Ptpra	Receptor-type tyrosine-protein phosphatase alpha	PTPRA_MOUSE	13	19737.4	23670.6	21079.2	20916.7	18197	18826.5	21712	23098.9
P18181	CD48 antigen	Cd48	P18181	P18181;F8WHM0;Q6P905	Cd48	CD48 antigen	CD48_MOUSE	7	27895.3	24600.7	30680.5	35443.6	39209.2	40025.3	37742.5	31090.7
P18242	Cathepsin D	Ctsd	P18242	P18242;Q3UCD9;F8WIR1;Q3TIR0;Q3TJN3;Q3TWL1;Q3TWR6;Q3TXL5;Q3U651;Q3U7I9;Q3U7P0;Q3U8W5;Q3UAQ1;Q3UC89;Q3UCW4;Q8C243	Ctsd	Cathepsin D	CATD_MOUSE	22	1025560	894377	841531	773540	1565020	1576820	1640780	1613150
P18293	Atrial natriuretic peptide receptor 1	Npr1	P18293	A0A0U1RPR8;P18293;P52785;Q3UWA6;Q5SDA5;Q6VVW5;F6YT88;Q2TAY4;Q3TZ08;B2RQD5;B7ZN37;E9Q6H0;F6VFS9;Q3UY30;Q6XE41;Q8BXH3;Q8R1P8;Q91X04;A0A0U1RPB5;Q3V2J4	Npr1	Atrial natriuretic peptide receptor 1	ANPRA_MOUSE	7	4097.4	8038.12	5431.84	4888.59	5454.06	5028.29	4734.52	6158.48
P18406	CCN family member 1	Ccn1	P18406	P18406;Q3TX21	Ccn1	CCN family member 1	CCN1_MOUSE	8	5974.09	5777.78	5783.08	6068.9	14734	11919.9	10863.4	11931.5
P18572	Basigin	Bsg	P18572	P18572;K3W4Q8;O55107;O55108;J3QP71	Bsg	Basigin	BASI_MOUSE	8	141594	203182	178222	160121	107813	106544	114602	118140
P18653	Ribosomal protein S6 kinase alpha-1	Rps6ka1	P18653	P18653;E9PWV3;F6Q8A4;F6RQA2;Q810V8;Q3TIM6;Q3UFZ5;Q505N6	Rps6ka1	Ribosomal protein S6 kinase alpha-1	KS6A1_MOUSE	13	19558.7	18659.4	18924.6	21971.7	16483.7	16494.6	15533.4	18859.3
P18654	Ribosomal protein S6 kinase alpha-3	Rps6ka3	P18654	P18654;B1AXN9;A7E215	Rps6ka3	Ribosomal protein S6 kinase alpha-3	KS6A3_MOUSE	32	107866	100117	94541.5	103939	99035.6	93654.4	94064.9	93831.6
P18760	Cofilin-1	Cfl1	P18760	P18760;P45591;A0A494B9A7;Q3UHW9;Q544Y7;Q9CX22	Cfl1	Cofilin-1	COF1_MOUSE	20	594964	459935	534074	616189	608145	600402	593943	617314
P18826	Phosphorylase b kinase regulatory subunit alpha, skeletal muscle isoform	Phka1	P18826	P18826;A2AI87;A2AI88;A2AI89;Q8BSV5	Phka1	Phosphorylase b kinase regulatory subunit alpha, skeletal muscle isoform	KPB1_MOUSE	1	2870.11	2040.78	2590.25	2283.33	1596.21	1031.38	1350.99	1955.97
P18872	Guanine nucleotide-binding protein G(o) subunit alpha	Gnao1	P18872	P18872;D3Z2M7;Q543S2	Gnao1	Guanine nucleotide-binding protein G(o) subunit alpha	GNAO_MOUSE	7	20650.7	20082	16649.9	20786.7	20110.6	18637.5	16896	45376
P18894	D-amino-acid oxidase	Dao	P18894	P18894;A0A0G2JFX0;Q91WH3	Dao	D-amino-acid oxidase	OXDA_MOUSE	13	88405.2	133673	119664	123405	77100.9	71787	71782.5	77814.9
P19001	Keratin, type I cytoskeletal 19	Krt19	P19001	P19001;B1AQ78	Krt19	Keratin, type I cytoskeletal 19	K1C19_MOUSE	43	664805	498730	661542	744495	751638	860367	776710	750543
P19096	Fatty acid synthase	Fasn	P19096	A0A0U1RNJ1;P19096;Q3UHT6;Q3TB22;O89060	Fasn	Fatty acid synthase	FAS_MOUSE	92	200430	101054	132258	156441	131737	128294	124990	135968
P19137	Laminin subunit alpha-1	Lama1	P19137	P19137	Lama1	Laminin subunit alpha-1	LAMA1_MOUSE	34	14888.4	19453	17819.7	15332	16415.8	18273.5	18155.6	19286.4
P19157	Glutathione S-transferase P 1	Gstp1	P19157	P19157;A0A494BAW2;A0A494B908	Gstp1	Glutathione S-transferase P 1	GSTP1_MOUSE	14	204944	237233	211529	193837	191133	195982	206279	204330
P19221	Prothrombin	F2	P19221	P19221;Q3TJ94;H7BX99	F2	Prothrombin	THRB_MOUSE	24	79984.5	69201.8	87732.2	90549	52979.6	54179.3	50033.8	60056.2
P19253	Large ribosomal subunit protein uL13	Rpl13a	P19253	P19253;A0A1B0GS68;A0A1B0GSQ6;A0A1B0GTA1;Q3TDS9;Q5M9M0;A0A1B0GQW6;A0A1B0GSF0	Rpl13a	Large ribosomal subunit protein uL13	RL13A_MOUSE	8	145870	123032	139150	134444	114494	125882	122069	137854
P19258	Mitochondrial inner membrane protein Mpv17	Mpv17	P19258	P19258;G3UVW1;D3YWI4;E9Q1I6;F8WHT5;Q3UU56	Mpv17	Mitochondrial inner membrane protein Mpv17	MPV17_MOUSE	1	55682.6	69914.3	58201.7	54378.6	45754.8	45251.3	48492.5	52590
P19324	Serpin H1	Serpinh1	P19324	P19324;Q3TJK3;Q3TWG9;Q8BV87;Q8BVU9	Serpinh1	Serpin H1	SERPH_MOUSE	31	377746	252374	317322	389045	298572	260939	232737	271999
P19426	Negative elongation factor E	Nelfe	P19426	P19426;Q3UIA1;G3UY39	Nelfe	Negative elongation factor E	NELFE_MOUSE	4	4052.06	2361.26	4361.96	6080.07	7019.82	9161.14	6625.42	6129.56
P19536	Cytochrome c oxidase subunit 5B, mitochondrial	Cox5b	P19536	P19536;Q9D881	Cox5b	Cytochrome c oxidase subunit 5B, mitochondrial	COX5B_MOUSE	9	1033460	1077110	1028840	1030840	1037330	944692	928789	982264
P19783	Cytochrome c oxidase subunit 4 isoform 1, mitochondrial	Cox4i1	P19783	P19783;A2RSV8	Cox4i1	Cytochrome c oxidase subunit 4 isoform 1, mitochondrial	COX41_MOUSE	18	928797	1235210	1021620	930449	960254	908820	879622	967465
P19788	Matrix Gla protein	Mgp	P19788	P19788;Q3TVX6;Q6NSS4;Q8VEK8	Mgp	Matrix Gla protein	MGP_MOUSE	3	8545.28	8081.56	9132.41	14250.1	12729.6	10063.7	12906.4	8938.94
P19973	Lymphocyte-specific protein 1	Lsp1	P19973	P19973;A0A1B0GRF5;A2A6J4;A2A6J7	Lsp1	Lymphocyte-specific protein 1	LSP1_MOUSE	4	22565.5	12424.1	14660.2	22735.3	23776.4	21070.1	20688.9	23739.1
P20029	Endoplasmic reticulum chaperone BiP	Hspa5	P20029	P20029;Q3TI47;Q3TKF8;Q3TWF2;Q3U6V3;Q3U7T8;Q3U9G2;Q9DC41;Q3TUS2;Q3UEM8	Hspa5	Endoplasmic reticulum chaperone BiP	BIP_MOUSE	45	615413	530961	620721	664559	606902	562238	526803	556189
P20060	Beta-hexosaminidase subunit beta	Hexb	P20060	P20060;Q3TXR9	Hexb	Beta-hexosaminidase subunit beta	HEXB_MOUSE	30	230920	214397	228714	231275	666539	819600	794541	665637
P20065	Thymosin beta-4	Tmsb4x	P20065	P20065;Q6ZWX2	Tmsb4x	Thymosin beta-4	TYB4_MOUSE	3	335115	227331	256353	364754	467069	400413	300393	306045
P20108	Thioredoxin-dependent peroxide reductase, mitochondrial	Prdx3	P20108	P20108;Q8K4K8	Prdx3	Thioredoxin-dependent peroxide reductase, mitochondrial	PRDX3_MOUSE	10	434158	612698	518405	482595	573923	605544	565790	646181
P20152	Vimentin	Vim	P20152	P20152;Q5FWJ3;A0A0A6YWC8;A4IF59;Q3TFD9;Q3TWV0;Q3U6S1;Q3UAX1;Q3UD36;Q3V2S4	Vim	Vimentin	VIME_MOUSE	52	1101850	908441	1035840	1167820	1025880	1083560	939176	994660
P20352	Tissue factor	F3	P20352	A0A0R4J088;P20352;Q8R3Q1;A0A0G2JGS5;Q6RFS9	F3	Tissue factor	TF_MOUSE	1	2900.92	3429.84	2376.26	2848.88	3823.58	5176.56	4093.93	4135.86
P20357	Microtubule-associated protein 2	Map2	P20357	P20357;A0A668KLC6;B2KGT5;Q3TLQ0;Q80X35;Q80ZL4	Map2	Microtubule-associated protein 2	MTAP2_MOUSE	1								945.361
P20444	Protein kinase C alpha type	Prkca	P20444	P20444;P63318;Q4VA93;Q3UN66;Q2NKI4	Prkca	Protein kinase C alpha type	KPCA_MOUSE	5	7778.18	6308.61	6558.71	8616.8	6086.6	6125.34	7377.08	6331.94
P20491	High affinity immunoglobulin epsilon receptor subunit gamma	Fcer1g	P20491	P20491	Fcer1g	High affinity immunoglobulin epsilon receptor subunit gamma	FCERG_MOUSE	3	11634	10431.4	9909.1	16424.5	10491	12907.9	8914.02	10770.4
P20664	DNA primase small subunit	Prim1	P20664	P20664;Q3UZF0;Q5FW94	Prim1	DNA primase small subunit	PRI1_MOUSE	2	7170.29	4777.72	6209.01	5913.97	7916.43	5662.3	4823.48	5901.7
P20852	Cytochrome P450 2A5	Cyp2a5	P20852	P20852;Q80XK1;Q91X75	Cyp2a5	Cytochrome P450 2A5	CP2A5_MOUSE	20	18367.1	80801.2	49545.5	29231.1	15344	15741	15569.6	18979
P20918	Plasminogen	Plg	P20918	P20918;Q3V1T9	Plg	Plasminogen	PLMN_MOUSE	51	163897	145250	163833	172943	121381	127901	117390	134488
P21107	Tropomyosin alpha-3 chain	Tpm3	P21107	P21107;A0A0R4J1P2;E9Q7Q3;Q8C7C3	Tpm3	Tropomyosin alpha-3 chain	TPM3_MOUSE	7	433490	453496	438927	462155	478792	477495	481891	490876
P21126	Ubiquitin-like protein 4A	Ubl4a	P21126	P21126;Q3UK94;B2M0R9;B2M0S0;Q684Q9;Q91V47	Ubl4a	Ubiquitin-like protein 4A	UBL4A_MOUSE	10	30338.8	30360.3	29295.9	29698	30205.6	33606.6	36411.2	32047.8
P21180	Complement C2	C2	P21180	P21180;B8JJN0;B8JJN2;B8JJM9;F6VQX8;Q792Q3	C2	Complement C2	CO2_MOUSE	16	16371.7	13051.9	15584.1	16636.2	23470	17692.4	14810.5	17218
P21271	Unconventional myosin-Vb	Myo5b	P21271	P21271;G3X9Y9;G5E8G6;Q6PER8	Myo5b	Unconventional myosin-Vb	MYO5B_MOUSE	43	19740.3	19596.7	19246.9	17427.1	19786.8	19381.9	18966.5	18478.8
P21278	Guanine nucleotide-binding protein subunit alpha-11	Gna11	P21278	P21278;Q3UPA1;Q91X95	Gna11	Guanine nucleotide-binding protein subunit alpha-11	GNA11_MOUSE	13	17503.8	16892.8	17061.4	19713.2	16458.4	15855.4	17718.6	18212.9
P21279	Guanine nucleotide-binding protein G(q) subunit alpha	Gnaq	P21279	P21279;Q3UHH5	Gnaq	Guanine nucleotide-binding protein G(q) subunit alpha	GNAQ_MOUSE	19	68790.3	61687.5	63156.4	67799	63832.5	64063.5	68672.2	74200.1
P21300	Aldo-keto reductase family 1 member B7	Akr1b7	P21300	P21300;Q3UGS8;Q5M9J9	Akr1b7	Aldo-keto reductase family 1 member B7	ALD1_MOUSE	10	40807.5	53196.7	55891.4	56803.4	42138.9	38895.1	43103.9	48913.8
P21447	ATP-dependent translocase ABCB1	Abcb1a	P21447	P06795;P21440;P21447;Q9QY30;B2RUR3;Q3UMH0;A0A0G2JF49;Q9JL39	Abcb1a	ATP-dependent translocase ABCB1	MDR1A_MOUSE	9	15141.3	17316.3	17385	15229	11956	13129.7	10184.3	13884.4
P21460	Cystatin-C	Cst3	P21460	P21460;Q3U5K7;Q9EPX9	Cst3	Cystatin-C	CYTC_MOUSE	10	26120	21412.9	30006.4	33346.2	58465.1	51015.7	44470.1	51733
P21550	Beta-enolase	Eno3	P21550	P17182;P17183;P21550;J3QPZ9;Q4FK59;A0A0N4SUX5;D3Z6E4;Q3UJ20;Q545V3;Q5FW97;Q6PHC1;Q922A0	Eno3	Beta-enolase	ENOB_MOUSE	11	935515	867713	784350	835919	792381	794102	764636	981752
P21570	Angiogenin	Ang	P21570	P21570;Q3TBG7	Ang	Angiogenin	ANGI_MOUSE	6	54517.1	36874	37044.9	43316.4	61384.4	59683.6	53839.3	82007.8
P21614	Vitamin D-binding protein	Gc	P21614	P21614;A0A0G2JGM6	Gc	Vitamin D-binding protein	VTDB_MOUSE	22	144332	106029	131698	175139	116087	112424	97847.9	116243
P21619	Lamin-B2	Lmnb2	P21619	P21619;A0A0R4J0Q5	Lmnb2	Lamin-B2	LMNB2_MOUSE	38	269012	292473	266199	269702	247069	267717	271572	264479
P21812	Mast cell protease 4	Mcpt4	P21812	P21812;P11034;Q3UN88;Q496V0	Mcpt4	Mast cell protease 4	MCPT4_MOUSE	1		3978.45
P21844	Chymase	Cma1	P21844	P21844;A4QPC5	Cma1	Chymase	CMA1_MOUSE	1		4399.28	1807.18					1344.83
P21855	B-cell differentiation antigen CD72	Cd72	P21855	P21855;A2AIN5;Q3UB58;Q3UNJ0;Q3UZ35	Cd72	B-cell differentiation antigen CD72	CD72_MOUSE	2	5154.58	3484.46	7033.68	5179.41	6043.11	4733.24	4189.82	2544.87
P21956	Lactadherin	Mfge8	P21956	P21956;Q3TDU5;Q9QWQ1	Mfge8	Lactadherin	MFGM_MOUSE	24	201828	200528	234932	232467	141481	168780	177961	173033
P21958	Antigen peptide transporter 1	Tap1	P21958	P21958;A0A068BER1;Q3U543;Q3U6V4;Q62428;Q62429;Q64333;Q78E61;Q3TBA3	Tap1	Antigen peptide transporter 1	TAP1_MOUSE	20	24845.6	18577.7	28808.3	26360.3	35877.2	33744.6	31340.7	28885.1
P21981	Protein-glutamine gamma-glutamyltransferase 2	Tgm2	P21981	P21981	Tgm2	Protein-glutamine gamma-glutamyltransferase 2	TGM2_MOUSE	38	777328	720033	719028	669274	935115	844323	813358	775182
P21995	Embigin	Emb	P21995	P21995;Q3TI59;Q3TSZ8;Q3UFK0	Emb	Embigin	EMB_MOUSE	7	16772.4	21312.4	20215.5	20411.6	14203	15771.4	17261.7	21635.2
P22227	Zinc finger protein 42	Zfp42	P22227	P22227;E9QK22	Zfp42	Zinc finger protein 42	ZFP42_MOUSE	1	1933.38		2284.15	5435.72	4475.37	3839.47		2919.38
P22315	Ferrochelatase, mitochondrial	Fech	P22315	P22315;A0A494B9Y8;A0A494BAI5;F6T2S0;Q3UC49;Q8C3V7;Q91W09;Q4QRK2	Fech	Ferrochelatase, mitochondrial	HEMH_MOUSE	20	137202	164813	147817	134220	131273	132608	129996	131072
P22361	Hepatocyte nuclear factor 1-alpha	Hnf1a	P22361	P22361;H3BL72;Q66JY7	Hnf1a	Hepatocyte nuclear factor 1-alpha	HNF1A_MOUSE	2	4812.71	4286.88	2657.14	4076.51	3661.5	4918.3	4293.7	3245.59
P22366	Myeloid differentiation primary response protein MyD88	Myd88	P22366	P22366;Q3U7M4;Q0PM15;Q0PM16;Q3TIB3;Q3U6W5;Q3UDG9;F6SPW1;Q8C1X0	Myd88	Myeloid differentiation primary response protein MyD88	MYD88_MOUSE	6	18708.6	15318.3	17972.2	17224.7	18563.9	15971.7	15812	16501.5
P22437	Prostaglandin G/H synthase 1	Ptgs1	P22437	P22437;Q543T1;Q3UZ23;Q3TJN9	Ptgs1	Prostaglandin G/H synthase 1	PGH1_MOUSE	13	27873.2	28976	27701.8	29149.7	25114.9	29222.7	28218.4	32066.7
P22518	Dual specificity protein kinase CLK1	Clk1	P22518	P22518;Q3UKA7	Clk1	Dual specificity protein kinase CLK1	CLK1_MOUSE	2	6618.18	6478.97	5919.24	6006.85	7370.48	8330.33	7243.28	5455.75
P22599	Alpha-1-antitrypsin 1-2	Serpina1b	P22599	P22599;Q3KQQ4;Q91X22	Serpina1b	Alpha-1-antitrypsin 1-2	A1AT2_MOUSE	5	302462	264093	260250	344024	235037	235044	216284	214585
P22682	E3 ubiquitin-protein ligase CBL	Cbl	P22682	P22682;A0A0U1RP17;A0A0U1RP47;A0A0U1RQ85;A0A0X1KG61;Q2M4H7	Cbl	E3 ubiquitin-protein ligase CBL	CBL_MOUSE	11	9743.06	8248.58	10281.8	9655.96	9060.66	9699.17	8340.2	10433.6
P22725	Protein Wnt-5a	Wnt5a	P22725	P22725	Wnt5a	Protein Wnt-5a	WNT5A_MOUSE	2	2583.26	1772.23	3452.2	3993.81	2495.55	3092.18	2702.05	3597.42
P22777	Plasminogen activator inhibitor 1	Serpine1	P22777	P22777;G5E899;D0ESZ5;D0ESZ6;Q7TPE9	Serpine1	Plasminogen activator inhibitor 1	PAI1_MOUSE	13	7202.31	6151.07	7620.64	10529	31395.6	34833.6	25638.8	25074.6
P22892	AP-1 complex subunit gamma-1	Ap1g1	P22892	P22892;Q8CBB7;Q3UKX8;Q8CC03	Ap1g1	AP-1 complex subunit gamma-1	AP1G1_MOUSE	29	121048	122184	130629	110809	126569	129776	131813	139428
P22907	Porphobilinogen deaminase	Hmbs	P22907	P22907;Q3UBC6;Q3UPG1;Q99L41	Hmbs	Porphobilinogen deaminase	HEM3_MOUSE	15	54262.5	59582.8	59918.5	62163	67280.3	67986.6	65155.6	65308.1
P23116	Eukaryotic translation initiation factor 3 subunit A	Eif3a	P23116	P23116;Q3TKF9;Q3UEK3;Q3UL99;Q3UM46;Q6A0B9	Eif3a	Eukaryotic translation initiation factor 3 subunit A	EIF3A_MOUSE	54	103656	95435.9	103461	104842	109516	102553	101861	102040
P23188	Furin	Furin	P23188	P23188	Furin	Furin	FURIN_MOUSE	3	6737.02	4843.24	6620.52	8014.68	5419.74	5546.07	7783.68	7097.63
P23198	Chromobox protein homolog 3	Cbx3	P23198	P23198;I6L9I7;Q32P00;Q9DCC5	Cbx3	Chromobox protein homolog 3	CBX3_MOUSE	10	53443.1	48530.2	52537.6	56756.7	49302.5	51396.6	55065.8	48126.2
P23249	Putative helicase MOV-10	Mov10	P23249	P23249;D3YVL0;D3Z3E8;E9PW39;Q3TFC0;Q3UD86;Q69ZE2	Mov10	Putative helicase MOV-10	MOV10_MOUSE	25	31579.9	32453.7	36057.5	33213.8	41598.2	36426.8	35655.6	33026.9
P23298	Protein kinase C eta type	Prkch	P23298	P23298;Q3UKY1;Q3U1I0	Prkch	Protein kinase C eta type	KPCL_MOUSE	6	6048.57	8528.77	7430.65	7084	6596.01	8525.93	6527.01	6864.57
P23463	Homeobox protein Hox-D8	Hoxd8	P23463	P23463;A2ASN1;F6W963;Q9CUH8;Q9CUQ8	Hoxd8	Homeobox protein Hox-D8	HXD8_MOUSE	1	2012.9	3897.45	1661.59		1365.08	1901.6	1575.22	2585.38
P23475	X-ray repair cross-complementing protein 6	Xrcc6	P23475	P23475;A0A0R4J187;A0A2R8VHZ9	Xrcc6	X-ray repair cross-complementing protein 6	XRCC6_MOUSE	20	35022.3	31211.1	30056.9	31586.8	32497.5	31253.5	32355.7	31275.5
P23492	Purine nucleoside phosphorylase	Pnp	P23492	P23492;A0A2I3BQH2;Q543K9;Q9D8C9;A0A2I3BS22	Pnp	Purine nucleoside phosphorylase	PNPH_MOUSE	20	456570	430138	496248	451508	489876	482731	465150	476571
P23506	Protein-L-isoaspartate(D-aspartate) O-methyltransferase	Pcmt1	P23506	P23506;E0CYV0;E9PWE0;F6V9F1;F7D432;Q545L9;Q8BPI6	Pcmt1	Protein-L-isoaspartate(D-aspartate) O-methyltransferase	PIMT_MOUSE	16	74286.8	69569.6	69751.5	68789.1	70840.4	72568.9	65766	73467.6
P23589	Carbonic anhydrase 5A, mitochondrial	Ca5a	P23589	P23589	Ca5a	Carbonic anhydrase 5A, mitochondrial	CAH5A_MOUSE	1	2730.73	3439.72	4470.91			3714.32		3415.06
P23591	GDP-L-fucose synthase	Gfus	P23591	P23591;A0A2R8VI39;A0A2R8W6P6;Q5HZI6	Gfus	GDP-L-fucose synthase	FCL_MOUSE	12	40069.9	34183.2	35406.6	43533.8	44069.6	42967.1	48079.9	43548.8
P23611	Interferon regulatory factor 8	Irf8	P23611	P23611;Q544J7;E0CZE4;F7C1A3;Q3TZQ3;Q3U068;Q3U075;Q3U0X4;Q3UCV9	Irf8	Interferon regulatory factor 8	IRF8_MOUSE	1	1472.03	794.788	1230.94	1014.66	1185.43	1418.57	1500.82	1397.88
P23780	Beta-galactosidase	Glb1	P23780	P23780;Q3TAW7;Q8K131;Q99KV2	Glb1	Beta-galactosidase	BGAL_MOUSE	25	118877	109522	120945	107992	256461	294794	301233	245762
P23927	Alpha-crystallin B chain	Cryab	P23927	P23927;Q52L78;A0A1L1SRG5	Cryab	Alpha-crystallin B chain	CRYAB_MOUSE	10	344805	244735	234089	220174	315521	276644	282254	298885
P23949	mRNA decay activator protein ZFP36L2	Zfp36l2	P23949	P23949;Q9EQL8;Q9EQL7	Zfp36l2	mRNA decay activator protein ZFP36L2	TISD_MOUSE	2	3730.37	2413.71	3078.42	3082.67	2756.61	2455.87	2567.62	3100.18
P23950	mRNA decay activator protein ZFP36L1	Zfp36l1	P23950	P23949;P23950;Q543H2;Q91YI7;Q9EQL8;Q9EQL7	Zfp36l1	mRNA decay activator protein ZFP36L1	TISB_MOUSE	2	7657.61	6781.79	9144.1	8119.82	9286.56	8670.13	8475.38	6586.95
P23953	Carboxylesterase 1C	Ces1c	P23953	P23953;D3Z5G7	Ces1c	Carboxylesterase 1C	EST1C_MOUSE	19	126468	122862	119864	148342	90135.8	94602.6	99976.4	90647
P24063	Integrin alpha-L	Itgal	P24063	P24063;D3Z627;B7ZN90;B7ZN91;B7ZN92;D3YW95;H2ELL3;Q3T9N8;Q3TB85;Q9R200;Q9WTV4	Itgal	Integrin alpha-L	ITAL_MOUSE	14	9008.73	8618.54	11170.5	10901.9	10488.9	9732.75	10105.4	11792.5
P24270	Catalase	Cat	P24270	P24270;Q3TVZ1;Q3UF58;Q3UZE7;Q542K4;Q8C6E3;Q91XI2	Cat	Catalase	CATA_MOUSE	50	1975450	2685060	2633140	2408360	1909010	1876650	1714350	1710580
P24288	Branched-chain-amino-acid aminotransferase, cytosolic	Bcat1	P24288	P24288;E9Q4K3;A0A0N4SV61;Q3TJN1;Q3TKJ1;Q8CBC8;Q9CXX6	Bcat1	Branched-chain-amino-acid aminotransferase, cytosolic	BCAT1_MOUSE	12	24516.9	14907.5	23434.7	26002	25259.4	20553.7	21001.6	21827.5
P24369	Peptidyl-prolyl cis-trans isomerase B	Ppib	P24369	P24369;Q9DCY1;Q6ZQM2	Ppib	Peptidyl-prolyl cis-trans isomerase B	PPIB_MOUSE	17	162338	150889	169693	175469	169772	160472	159336	150689
P24452	Macrophage-capping protein	Capg	P24452	P24452;Q99LB4;Q3TNN6;Q3UJ44	Capg	Macrophage-capping protein	CAPG_MOUSE	10	480296	437309	423567	527546	510324	563134	563373	507525
P24456	Cytochrome P450 2D10	Cyp2d10	P24456	P24456;A0A2R8VKK3	Cyp2d10	Cytochrome P450 2D10	CP2DA_MOUSE	1	3013.31			2901.19		4452.71	4160.88	2939.19
P24472	Glutathione S-transferase A4	Gsta4	P24472	P24472	Gsta4	Glutathione S-transferase A4	GSTA4_MOUSE	11	73683.7	82228.2	74927.7	67097.6	75196.4	82004.9	82001.4	88300.4
P24527	Leukotriene A-4 hydrolase	Lta4h	P24527	P24527	Lta4h	Leukotriene A-4 hydrolase	LKHA4_MOUSE	36	205137	198183	207202	214154	188495	201642	202071	217983
P24529	Tyrosine 3-monooxygenase	Th	P24529	P24529;Q3UTB3	Th	Tyrosine 3-monooxygenase	TY3H_MOUSE	1	1319.22	2118.4		1982.59	2336.28	2997.79	1808.58	1998.86
P24547	Inosine-5'-monophosphate dehydrogenase 2	Impdh2	P24547	P24547;Q3UAT9;Q3U9N8;Q3UPJ2;A0A0A6YXS4	Impdh2	Inosine-5'-monophosphate dehydrogenase 2	IMDH2_MOUSE	21	31485.5	32364.8	34522.9	35242.1	39487.8	35430.1	36025	34344.8
P24549	Aldehyde dehydrogenase 1A1	Aldh1a1	P24549	P24549	Aldh1a1	Aldehyde dehydrogenase 1A1	AL1A1_MOUSE	19	39304.6	47897.4	38348.9	34041.2	24353.5	27675.4	28239.8	29045.8
P24604	Tyrosine-protein kinase Tec	Tec	P24604	P24604;Q3U436;I6L9F0;Q3TH41;Q8CFK4	Tec	Tyrosine-protein kinase Tec	TEC_MOUSE	2	2693.09			1412.34	1073.54	1471.76
P24638	Lysosomal acid phosphatase	Acp2	P24638	P24638;A0A5F8MPS7;B7ZCF4;B7ZCF5;Q3U4F3;Q3UZN1	Acp2	Lysosomal acid phosphatase	PPAL_MOUSE	13	74069.2	64640.5	73591.2	72042.6	120423	121164	118952	109011
P24668	Cation-dependent mannose-6-phosphate receptor	M6pr	P24668	P24668;Q3UF03;Q3UKQ5	M6pr	Cation-dependent mannose-6-phosphate receptor	MPRD_MOUSE	11	58536.6	52416.3	58951.6	58316.9	67924.4	67840.1	66133.1	65344.6
P24788	Cyclin-dependent kinase 11B	Cdk11b	P24788	P24788;Q64434;Q05AA8;A2A9P6;Q64036;Q8R190	Cdk11b	Cyclin-dependent kinase 11B	CD11B_MOUSE	17	21131.8	20304.2	19652.7	21597.4	20380.9	20281.5	19196.5	19133.7
P24815	3 beta-hydroxysteroid dehydrogenase/Delta 5-->4-isomerase type 1	Hsd3b1	P24815	P24815;Q3UI20;Q3UJ12	Hsd3b1	3 beta-hydroxysteroid dehydrogenase/Delta 5-->4-isomerase type 1	3BHS1_MOUSE	1	9451.92	18181.1	18047.5	14320	13812.6	9704.04	11489.2	10991.7
P25085	Interleukin-1 receptor antagonist protein	Il1rn	P25085	P25085;Q542C7;Q3TBV5;Q542W1;Q8CGA1;A0A0A6YVU4	Il1rn	Interleukin-1 receptor antagonist protein	IL1RA_MOUSE	6	31363.3	28424.2	29575.8	31236.9	30107.3	30147.3	26829.3	34619.8
P25118	Tumor necrosis factor receptor superfamily member 1A	Tnfrsf1a	P25118	P25118;Q3U479;Q3TVS9;Q6QHF0;Q6QHF1	Tnfrsf1a	Tumor necrosis factor receptor superfamily member 1A	TNR1A_MOUSE	3	4997.91	2933.74	4694.64	5004.23	8541.32	7194.01	6319.2	8920.33
P25119	Tumor necrosis factor receptor superfamily member 1B	Tnfrsf1b	P25119	P25119;Q545P4;Q3U2A9;Q62327	Tnfrsf1b	Tumor necrosis factor receptor superfamily member 1B	TNR1B_MOUSE	2	3462.16	3986.08	4329.57	6858.47	5704.01	5271.87	4601.94	4452.66
P25206	DNA replication licensing factor MCM3	Mcm3	P25206	P25206;Q3UI57;Q3ULD6;Q3UZH2	Mcm3	DNA replication licensing factor MCM3	MCM3_MOUSE	26	28264.2	20918.6	26124.3	25732.5	33282.6	29425.2	25476.7	27864.5
P25425	POU domain, class 2, transcription factor 1	Pou2f1	P25425;P31362;Q00196	P25425;P31362;Q00196;A0A0R4J1Z4;A0A0A0MQE0;A0A0A0MQM6;E9Q6Z8;F8VQL7;H3BKB7;I1E4X2;Q3U5D1;Q7TSC9;P70260	Pou2f1;Pou2f2;Pou2f3	POU domain, class 2, transcription factor 1	PO2F1_MOUSE;PO2F2_MOUSE;PO2F3_MOUSE	3	7170.52	5600.91	5288.87	5192.16	5258.85	7809.69	5701.89	7355.22
P25444	Small ribosomal subunit protein uS5	Rps2	P25444	P25444;D3YVC1;D3YWJ3;O89072;Q3TL20;Q3TLE5;Q3TXR5;Q3TXS9;Q3UB36;Q58EU3;Q9DC49	Rps2	Small ribosomal subunit protein uS5	RS2_MOUSE	19	312404	278057	293473	318288	320045	306646	321131	324858
P25446	Tumor necrosis factor receptor superfamily member 6	Fas	P25446	P25446;A0A494BBP5;A1Y9B2	Fas	Tumor necrosis factor receptor superfamily member 6	TNR6_MOUSE	1	3015.12	2537.24	2213.54	2928.42	1876.74	2274.2	2758.66
P25688	Uricase	Uox	P25688	P25688;Q543J0;A0A0G2JG44;D3Z4U1;Q8C7K4	Uox	Uricase	URIC_MOUSE	1		3350.35
P25785	Metalloproteinase inhibitor 2	Timp2	P25785	P25785;Q6PI17;Q8BSJ3;B1AQJ3	Timp2	Metalloproteinase inhibitor 2	TIMP2_MOUSE	3	2479.25	3346.18	2012.92	4356.32	5585.49	6568.7	3944.78	4384.17
P25799	Nuclear factor NF-kappa-B p105 subunit	Nfkb1	P25799	P25799;F6Z9G5;V9GX90	Nfkb1	Nuclear factor NF-kappa-B p105 subunit	NFKB1_MOUSE	14	11797.8	10629.9	12102.2	12535.3	10802.7	10230.5	10059.8	11436.8
P25911	Tyrosine-protein kinase Lyn	Lyn	P25911	P25911;Q3TCS3;Q05DV0;Q3U6Q5;Q8CEI0	Lyn	Tyrosine-protein kinase Lyn	LYN_MOUSE	23	60249.7	51022.5	64640.8	65019.4	66453.2	64184.8	64289.5	69445.6
P25916	Polycomb complex protein BMI-1	Bmi1	P25916	P25916;Q2LC58;Q3ULL2;A2ASR5;A2ASR6;A2ASR7;A2ASR8	Bmi1	Polycomb complex protein BMI-1	BMI1_MOUSE	2	11271.7	8771.14	11673.7	11348.4	9508.32	7040.86	6954.37	9282.84
P25976	Nucleolar transcription factor 1	Ubtf	P25976	P25976;A2AWT5;Q9DBH1;A2AWT6;A2AWT7;E9Q4A8;Q05DS1	Ubtf	Nucleolar transcription factor 1	UBF1_MOUSE	24	118387	106761	107592	121742	100844	105242	112437	108422
P26039	Talin-1	Tln1	P26039	P26039;Q3TBC3;Q3UHS6;Q80TM2;Q0V930	Tln1	Talin-1	TLN1_MOUSE	153	343463	332465	326133	361351	346789	344303	350390	362119
P26040	Ezrin	Ezr	P26040	P26040;Q4KML7;Q3TCP5;Q3UL48;Q3UXR4	Ezr	Ezrin	EZRI_MOUSE	42	417069	483991	458457	429428	451569	422095	430817	461024
P26041	Moesin	Msn	P26041	P26041;Q05DU4;Q3TZQ2	Msn	Moesin	MOES_MOUSE	71	1036710	955546	1052850	1054800	1068400	1032670	1002010	1043840
P26043	Radixin	Rdx	P26043	A0A5F8MPB9;P26043;Q3TH46;Q3U111;Q3UJJ8;Q3TS74	Rdx	Radixin	RADI_MOUSE	29	87586.9	109047	108771	99555.1	90931.8	82149.2	88713.5	83426.7
P26150	3 beta-hydroxysteroid dehydrogenase/Delta 5-->4-isomerase type 3	Hsd3b3	P26150	O35469;P26149;P26150;B1ARP0;Q541Q1;Q76CU3;Q7TPU0	Hsd3b3	3 beta-hydroxysteroid dehydrogenase/Delta 5-->4-isomerase type 3	3BHS3_MOUSE	9	26857.1	35289.5	34776.4	26889.5	23206.3	17541.6	15154.1	18506
P26151	High affinity immunoglobulin gamma Fc receptor I	Fcgr1	P26151	P26151	Fcgr1	High affinity immunoglobulin gamma Fc receptor I	FCGR1_MOUSE	6	13219	10192.2	14547.6	13302.9	25107.7	21324.3	13665.5	13864.2
P26187	Methylated-DNA--protein-cysteine methyltransferase	Mgmt	P26187	P26187;Q4VA39	Mgmt	Methylated-DNA--protein-cysteine methyltransferase	MGMT_MOUSE	1	5420.61		6784.77	7816.83	6311.26	5705.93		5465.24
P26231	Catenin alpha-1	Ctnna1	P26231	P26231;Q61301;Q545R0;E0CXB9;Q3TGQ3	Ctnna1	Catenin alpha-1	CTNA1_MOUSE	55	106019	106701	110346	108948	104621	102662	107019	109576
P26262	Plasma kallikrein	Klkb1	P26262	P26262	Klkb1	Plasma kallikrein	KLKB1_MOUSE	18	15525.5	13889.5	15671.6	15567.2	10411.6	10848.2	11731.1	11534.2
P26323	Friend leukemia integration 1 transcription factor	Fli1	P26323	P26323;P81270;Q8QZW2;A0A384DVA0;B7ZND3;B7ZND4;E9PY05;H3BKX4;I1E4Y2;Q3UQJ4;Q544B3;Q8BJH6;Q8BZ56	Fli1	Friend leukemia integration 1 transcription factor	FLI1_MOUSE	1	6388.05	5348.84	3844.95	4238.12	4525.92	3964.23		5775.48
P26350	Prothymosin alpha	Ptma	P26350	P26350;Q0VGU2;Q3U6E4;Q3U8X6;Q3UA54;Q8C2T3;Q8CAQ5	Ptma	Prothymosin alpha	PTMA_MOUSE	4	19641.4	20116.8	21038.6	27742.7	15192.2	18938.9	18698.4	13840
P26369	Splicing factor U2AF 65 kDa subunit	U2af2	P26369	P26369;Q3KQM4;Q505Q1;Q80XR5;Q922I0	U2af2	Splicing factor U2AF 65 kDa subunit	U2AF2_MOUSE	15	57310.4	66961.7	61087.6	61125.1	65723	70910.5	71377.5	72261.8
P26443	Glutamate dehydrogenase 1, mitochondrial	Glud1	P26443	P26443	Glud1	Glutamate dehydrogenase 1, mitochondrial	DHE3_MOUSE	46	328330	515627	417843	338448	357972	389550	407610	396747
P26450	Phosphatidylinositol 3-kinase regulatory subunit alpha	Pik3r1	P26450	P26450;P70304;Q3TP23;Q80UI5	Pik3r1	Phosphatidylinositol 3-kinase regulatory subunit alpha	P85A_MOUSE	11	16554.4	15515.7	16008.6	16535.7	16349	13896	14617.3	15227.6
P26516	26S proteasome non-ATPase regulatory subunit 7	Psmd7	P26516	P26516;A1L3B8	Psmd7	26S proteasome non-ATPase regulatory subunit 7	PSMD7_MOUSE	12	71897.4	74230.1	78448	78800.2	77448.2	80940.8	81647.7	86652.3
P26618	Platelet-derived growth factor receptor alpha	Pdgfra	P26618	P26618	Pdgfra	Platelet-derived growth factor receptor alpha	PGFRA_MOUSE	11	6729.01	7123.48	7215.14	7854.81	11106.2	9123.06	8787.74	12406.2
P26638	Serine--tRNA ligase, cytoplasmic	Sars1	P26638	P26638;Q8C483;Q3U6F6;Q3U8N1;A2AFS0;A2AFS1	Sars1	Serine--tRNA ligase, cytoplasmic	SYSC_MOUSE	29	127269	112358	115775	123339	146593	138537	143941	136561
P26645	Myristoylated alanine-rich C-kinase substrate	Marcks	P26645	P26645;A0A0A1HAM8	Marcks	Myristoylated alanine-rich C-kinase substrate	MARCS_MOUSE	4	8114.83	7101.55	7792.44	12351.3	17662.6	15732.6	12367.7	17272.7
P26883	Peptidyl-prolyl cis-trans isomerase FKBP1A	Fkbp1a	P26883	P26883	Fkbp1a	Peptidyl-prolyl cis-trans isomerase FKBP1A	FKB1A_MOUSE	8	74671.1	70852.5	84102.1	82226.9	47072.7	48447.1	43844.4	41157.2
P26928	Hepatocyte growth factor-like protein	Mst1	P26928	P26928;E0CXN0;Q3UZ05;Q91XG8	Mst1	Hepatocyte growth factor-like protein	HGFL_MOUSE	7	7394.37	7905.32	7766.07	8149.49	9662.71	8587.98	6763.24	7894.17
P26952	Interleukin-3 receptor subunit alpha	Il3ra	P26952	P26952;A0A286YE20;A0A286YE23	Il3ra	Interleukin-3 receptor subunit alpha	IL3RA_MOUSE	3	5312.65	4180.98	5168.52	5036.16	7455.02	4922.14	5506.51	6637.63
P27005	Protein S100-A8	S100a8	P27005	P27005;Q53X15	S100a8	Protein S100-A8	S10A8_MOUSE	4	115736	67444.1	112979	131385	60575	82571.3	66831.1	97612.8
P27038	Activin receptor type-2A	Acvr2a	P27038	P27038;A2AI38;Q8BRV4	Acvr2a	Activin receptor type-2A	AVR2A_MOUSE	1	636.211				1226.83		1325.26
P27046	Alpha-mannosidase 2	Man2a1	P27046	P27046;F6QMB7	Man2a1	Alpha-mannosidase 2	MA2A1_MOUSE	46	41303.2	32295.8	38533.5	37844.7	43378.6	45801.4	41577.3	41815.2
P27512	Tumor necrosis factor receptor superfamily member 5	Cd40	P27512	P27512;A2A5L7	Cd40	Tumor necrosis factor receptor superfamily member 5	TNR5_MOUSE	4	15837.8	11188.6	16506.2	13856.1	13564.7	10787.2	13648.1	13870.5
P27546	Microtubule-associated protein 4	Map4	P27546	P27546;A0A0G2JDY5;A0A0G2JFH2;A0A0G2JFK3;A0A0G2JG35;A0A140T8T5;E9PZ43	Map4	Microtubule-associated protein 4	MAP4_MOUSE	28	62663.6	43690.6	49067.4	58879.8	94358.2	84045.9	96458.6	86798.6
P27573	Myelin protein P0	Mpz	P27573	P27573;A0A5F8MPM4;E9QK82	Mpz	Myelin protein P0	MYP0_MOUSE	1	3769.29	4729.88	1320.57	7550.07	4856.11	8765.18	1107.47	2538.56
P27600	Guanine nucleotide-binding protein subunit alpha-12	Gna12	P27600	P27600;Q2NKI3	Gna12	Guanine nucleotide-binding protein subunit alpha-12	GNA12_MOUSE	4	3974.51	4563.74	4581.84	4319.58	3970.24	4129.03	4188.17	4416.24
P27601	Guanine nucleotide-binding protein subunit alpha-13	Gna13	P27601	P27601;Q3UE40	Gna13	Guanine nucleotide-binding protein subunit alpha-13	GNA13_MOUSE	24	58219.8	61297.3	60499.1	60670.9	62070.3	56990.1	62953.1	60284.4
P27612	Phospholipase A-2-activating protein	Plaa	P27612	P27612	Plaa	Phospholipase A-2-activating protein	PLAP_MOUSE	25	62979.1	58010.3	61059.1	67420.1	66619.5	59470.5	61745.1	60899.4
P27641	X-ray repair cross-complementing protein 5	Xrcc5	P27641	P27641	Xrcc5	X-ray repair cross-complementing protein 5	XRCC5_MOUSE	20	53148.1	50380.4	46553.3	48886.1	50735	50408	54875.6	55891.9
P27659	Large ribosomal subunit protein uL3	Rpl3	P27659	P27659;A0A087WQK0;Q3T9U9;Q3U9L3;Q3UB15;Q3UB67;Q3UB90	Rpl3	Large ribosomal subunit protein uL3	RL3_MOUSE	32	365155	362272	374172	398273	395081	391633	391802	402789
P27773	Protein disulfide-isomerase A3	Pdia3	P27773	P27773	Pdia3	Protein disulfide-isomerase A3	PDIA3_MOUSE	57	1085340	887462	1073310	1130780	1112860	1031200	936960	952605
P27784	C-C motif chemokine 6	Ccl6	P27784	P27784	Ccl6	C-C motif chemokine 6	CCL6_MOUSE	1			1063.72	2133.64	3950.2	3071.89	3310.95	5644.36
P27808	Alpha-1,3-mannosyl-glycoprotein 2-beta-N-acetylglucosaminyltransferase	Mgat1	P27808	P27808;Q544F0;Q8CIC9	Mgat1	Alpha-1,3-mannosyl-glycoprotein 2-beta-N-acetylglucosaminyltransferase	MGAT1_MOUSE	15	18842.4	18764.9	16613.2	19464.2	24205.3	21478.9	19343.3	21555.3
P27870	Proto-oncogene vav	Vav1	P27870	P27870;Q3U9E2;E9PXI0;Q3TXC4;Q3U4K7;Q3U670;Q3U8U1;Q3UAG9;Q3UAH3;Q3UAV5;Q8VDU4	Vav1	Proto-oncogene vav	VAV_MOUSE	22	40447.3	28452.4	39899.6	41442.4	40042.6	40315.3	38311	39697.1
P27889	Hepatocyte nuclear factor 1-beta	Hnf1b	P27889	P27889;Q2M4H2	Hnf1b	Hepatocyte nuclear factor 1-beta	HNF1B_MOUSE	5	3998.08	3113.86	4009.25	4236.77	3306.59	3259.38	3842.33	3634.02
P28028	Serine/threonine-protein kinase B-raf	Braf	P28028	P28028;A0A7N4FLU7;Q9JJU6	Braf	Serine/threonine-protein kinase B-raf	BRAF_MOUSE	3	6653.26	4498.24	5301.75	4080.9	5431.8	4667.64	5113.7	5579.56
P28033	CCAAT/enhancer-binding protein beta	Cebpb	P28033	P28033;Q3UPN9;O70192	Cebpb	CCAAT/enhancer-binding protein beta	CEBPB_MOUSE	1					4197.25	3679.95	4210.02	3747.71
P28063	Proteasome subunit beta type-8	Psmb8	P28063	P28063;A0A068BIT8	Psmb8	Proteasome subunit beta type-8	PSB8_MOUSE	15	57256.9	40545.5	54679	50419.2	68790.4	74107	71182.2	62591
P28078	Class II histocompatibility antigen, M alpha chain	H2-DMa	P28078	P28078;Q31621;Q31106;Q31107;Q31108;Q61832;Q95605;Q95606;Q9BCZ3;Q31096;Q31607	H2-DMa	Class II histocompatibility antigen, M alpha chain	DMA_MOUSE	2	16899.7	15002.8	23925.1	24289.3	40262.8	36161.4	46137.8	33466.8
P28271	Cytoplasmic aconitate hydratase	Aco1	P28271	P28271;Q8VDC3	Aco1	Cytoplasmic aconitate hydratase	ACOHC_MOUSE	55	801819	1028920	946401	841484	879355	918620	912675	904336
P28293	Cathepsin G	Ctsg	P28293	P28293;Q059V7	Ctsg	Cathepsin G	CATG_MOUSE	8	12002	9691.35	13126	14506.4	8815.87	10791.9	11985	18578.8
P28301	Protein-lysine 6-oxidase	Lox	P28301	P28301;Q3TXH3;Q3TLP7;Q3TP83;Q3TWI1;Q3TX90;Q3UXV2	Lox	Protein-lysine 6-oxidase	LYOX_MOUSE	3	5536.9	2543.21	2429.96	2194.87	4727.03	5450.48	3612.49
P28352	DNA repair nuclease/redox regulator APEX1	Apex1	P28352	P28352;Q544Z7;F6QA74;D3Z6R9	Apex1	DNA repair nuclease/redox regulator APEX1	APEX1_MOUSE	16	91327.4	94025.8	87665.3	86031.8	88809.5	90714	96649.9	90903.1
P28474	Alcohol dehydrogenase class-3	Adh5	P28474	P28474;Q6P5I3	Adh5	Alcohol dehydrogenase class-3	ADHX_MOUSE	17	178279	212653	194505	181096	183939	193744	195632	199433
P28571	Sodium- and chloride-dependent glycine transporter 1	Slc6a9	P28571	P28571;E9Q3V0;E9Q3Z2;E9Q517;E9QA02	Slc6a9	Sodium- and chloride-dependent glycine transporter 1	SC6A9_MOUSE	2	10190.8	13962.9	13651.4	10977	12639.6	10964.9	9015.51	10495.5
P28574	Protein max	Max	P28574	P28574;A0A1W2P7P4	Max	Protein max	MAX_MOUSE	3	10762.9	11278.6	14417.3	13963	14649.2	12863.5	12772.1	13835.7
P28650	Adenylosuccinate synthetase isozyme 1	Adss1	P28650	J3QN31;P28650;Q3UBP0	Adss1	Adenylosuccinate synthetase isozyme 1	PURA1_MOUSE	8	10271.4	10502.9	8658.53	11006.6	8054.86	8595	8194.81	12508.6
P28651	Carbonic anhydrase-related protein	Ca8	P28651	P28651	Ca8	Carbonic anhydrase-related protein	CAH8_MOUSE	1		1702.57	1167.35	1194.14	2491.54	1544.86	1643.74	1579.97
P28653	Biglycan	Bgn	P28653	P28653;Q3TAF9;Q3TNY9;Q3UXK8;Q7TMW3;Q6PG76	Bgn	Biglycan	PGS1_MOUSE	14	135654	94242.1	115827	141077	141197	136217	125683	132160
P28654	Decorin	Dcn	P28654	P28654;Q3UKR1;Q3TSV1	Dcn	Decorin	PGS2_MOUSE	10	31889.3	36113.2	25746.9	31935.4	36301.6	43162.8	30527.5	34799.9
P28656	Nucleosome assembly protein 1-like 1	Nap1l1	P28656	P28656;Q9CSP8;Q3TF41;Q8BSH9	Nap1l1	Nucleosome assembly protein 1-like 1	NP1L1_MOUSE	9	24871.5	20756.9	17561	21354	21086.1	21317.5	20272.7	21008.8
P28658	Ataxin-10	Atxn10	P28658	P28658;Q3TCF4;Q3TKP3;Q8BWX1	Atxn10	Ataxin-10	ATX10_MOUSE	15	23360.9	17544	21635.6	23810.8	21240.3	17450.4	15996.4	16978.3
P28659	CUGBP Elav-like family member 1	Celf1	P28659	P28659;A0A0R4J0T5	Celf1	CUGBP Elav-like family member 1	CELF1_MOUSE	13	74147.4	70286.8	66796.7	71377.4	81909.8	78445.3	77535.4	78805.2
P28660	Nck-associated protein 1	Nckap1	P28660	P28660;A2AS98;A1L0U6	Nckap1	Nck-associated protein 1	NCKP1_MOUSE	40	44485.5	45304.4	45988.4	39996.8	38768.8	38726.8	41705.6	44405.2
P28661	Septin-4	Septin4	P28661	P28661;A0A5F8MP96;Q5ND09;Q5ND13	Septin4	Septin-4	SEPT4_MOUSE	14	30616.5	30161.3	29413.5	32643.4	26553.9	29188.1	28813.6	25022.3
P28665	Murinoglobulin-1	Mug1	P28665	P28665	Mug1	Murinoglobulin-1	MUG1_MOUSE	58	100919	94144	110327	106909	115231	109876	102528	84757
P28667	MARCKS-related protein	Marcksl1	P28667	P28667	Marcksl1	MARCKS-related protein	MRP_MOUSE	3	5737.37	4390.82	3563.94	6191.15	10843.1	11476.3	9174.1	9391.31
P28700	Retinoic acid receptor RXR-alpha	Rxra	P28700;P28705	P28700;P28704;P28705;A0A5F8MQ23;Q6LC96;A0A068BD65;A0A068BES4;A0A068BFV6;A0A068BGT5;A0A068BGV8;A0A068BIV0;A0A5F8MP91;A2AJP1;E9Q9V9;Q3TWJ1;Q3UMU4;Q8VCR0;A2AJP2	Rxra;Rxrg	Retinoic acid receptor RXR-alpha	RXRA_MOUSE;RXRG_MOUSE	2	2635.17	3563.37	2636.94	5182.3	3845.72	3912.23	3446.42	4174.15
P28704	Retinoic acid receptor RXR-beta	Rxrb	P28704	P28704;A0A068BD65;A0A068BES4;A0A068BFV6;A0A068BGT5;A0A068BGV8;A0A068BIV0;Q3TWJ1;Q8VCR0	Rxrb	Retinoic acid receptor RXR-beta	RXRB_MOUSE	1	868.748	1315.97	1411.87	1894.8	1771.66	1636.37	991.547	1731.43
P28738	Kinesin heavy chain isoform 5C	Kif5c	P28738	P28738;Q3TY51;Q8CHF1	Kif5c	Kinesin heavy chain isoform 5C	KIF5C_MOUSE	1	10447.9	9638.69	10598.7	9392.04	6843.24	9655.26	14447
P28740	Kinesin-like protein KIF2A	Kif2a	P28740	P28740;E0CZ72;F8VQ42	Kif2a	Kinesin-like protein KIF2A	KIF2A_MOUSE	7	9872.22	7871.43	8184.75	8583.41	8597.67	8231.6	7540.31	8821.2
P28741	Kinesin-like protein KIF3A	Kif3a	P28741	P28741;B1AQZ2;Q3UI47;Q3TET1;B1AQZ5	Kif3a	Kinesin-like protein KIF3A	KIF3A_MOUSE	16	9608.37	8182.58	8769.46	10038.3	10494.8	7559.68	8217.16	8532.76
P28798	Progranulin	Grn	P28798	P28798;Q3U9N4;Q3TVQ3;Q3TW77;Q3TWT4;Q3TX66;Q3U5Q6;Q3U8W3;Q3U9K2;Q3UAJ3;Q3UC19;Q3UD85;Q3UDD6;Q9D2V3;H3BJE0;Q544Y8	Grn	Progranulin	GRN_MOUSE	14	204795	194286	203984	253025	452368	518842	430060	386385
P28825	Meprin A subunit alpha	Mep1a	P28825	P28825;A0A0R4J043	Mep1a	Meprin A subunit alpha	MEP1A_MOUSE	26	230662	383226	339332	254893	175447	171230	174713	182536
P28828	Receptor-type tyrosine-protein phosphatase mu	Ptprm	P28828	P28828;Q68FM4;A0A286YDL1	Ptprm	Receptor-type tyrosine-protein phosphatase mu	PTPRM_MOUSE	9	7661.45	8180.46	8380.9	8197.6	8597.28	7225.66	7282.15	8793.06
P28843	Dipeptidyl peptidase 4	Dpp4	P28843	P28843;Q3TR43	Dpp4	Dipeptidyl peptidase 4	DPP4_MOUSE	37	177468	200829	183189	162152	194096	212827	216103	210341
P28862	Stromelysin-1	Mmp3	P28862	P28862;Q922W6;Q3UFJ0	Mmp3	Stromelysin-1	MMP3_MOUSE	1	1194.23	807.778	1594.41	1371.19	2465.15	1409.8	1157.63	2840.54
P28867	Protein kinase C delta type	Prkcd	P28867	P28867;Q3TGE4;Q3UNG2;Q53YN4;Q80UN7	Prkcd	Protein kinase C delta type	KPCD_MOUSE	24	60361.3	49474.8	54541.3	56166.4	51345.2	51616.2	49720.3	52444.3
P29037	TATA-box-binding protein	Tbp	P29037;Q6SJ95	P29037;Q6SJ95;Q6RI65;B7ZMZ6;F8WJ67;Z4YMT0	Tbp;Tbpl2	TATA-box-binding protein	TBPL2_MOUSE;TBP_MOUSE	1	4012.73	3328.85	3042.11	4287.08	4511.6	3458.57	3981.6	4041.29
P29268	CCN family member 2	Ccn2	P29268	P29268;H3BJW0	Ccn2	CCN family member 2	CCN2_MOUSE	15	7779.63	9094.01	9507.55	11593.2	33895.3	33475	33102	29278.2
P29341	Polyadenylate-binding protein 1	Pabpc1	P29341	P29341;A2A5N3;B2RXY9;Q3U8U8;Q8BN32;Q99KL3	Pabpc1	Polyadenylate-binding protein 1	PABP1_MOUSE	35	101988	92804.4	106595	105824	107743	109310	106685	108624
P29351	Tyrosine-protein phosphatase non-receptor type 6	Ptpn6	P29351	P29351;Q3UCJ0;Q3TE70;Q3UB72	Ptpn6	Tyrosine-protein phosphatase non-receptor type 6	PTN6_MOUSE	31	133372	105786	127009	143240	125221	117804	118522	117762
P29387	Guanine nucleotide-binding protein subunit beta-4	Gnb4	P29387	P29387;Q3THF3;Q3TY18;Q3U2F9	Gnb4	Guanine nucleotide-binding protein subunit beta-4	GBB4_MOUSE	6	48971.3	44216.7	48792.1	55413.7	47776.2	59153.7	55776.4	54239.3
P29391	Ferritin light chain 1	Ftl1	P29391	P29391;A0A1B0GR60;Q3THE6;Q3TJJ6;Q3UCL5;Q3UL79;Q9CPX4;Q9CZE7	Ftl1	Ferritin light chain 1	FRIL1_MOUSE	17	957995	1011570	940253	959112	945766	1036040	1079830	942860
P29416	Beta-hexosaminidase subunit alpha	Hexa	P29416	P29416;Q3TVI2;Q3TW10;Q3TXV7;Q3U936;Q3UCP6;Q8BNS6;Q3TKF6	Hexa	Beta-hexosaminidase subunit alpha	HEXA_MOUSE	21	52560.5	36613.1	45411.3	48315.9	125820	155015	145959	115843
P29452	Caspase-1	Casp1	P29452	P29452;A0A571BDI1;A0A571BF22	Casp1	Caspase-1	CASP1_MOUSE	7	6996.34	5013.36	6710.59	7266.23	6679.81	6230.77	6415.32	6114.93
P29533	Vascular cell adhesion protein 1	Vcam1	P29533	P29533;Q3UPN1;Q3TR98;Q8K0X1;Q91X98	Vcam1	Vascular cell adhesion protein 1	VCAM1_MOUSE	25	92566.5	75994.3	87618.9	77740.3	88562.6	82597.7	92116.1	93016.9
P29594	Caspase-2	Casp2	P29594	P29594;D6RFN6	Casp2	Caspase-2	CASP2_MOUSE	3	10040.9	10137.1	9628.46	9307.1	9834.35	10200.7	11318.1	11510.7
P29595	Ubiquitin-like protein NEDD8	Nedd8	P29595	P29595;Q3UI46	Nedd8	Ubiquitin-like protein NEDD8	NEDD8_MOUSE	4	35326.6	37079.6	37464.8	45127.1	37427.3	45280.4	49010.3	44876
P29699	Alpha-2-HS-glycoprotein	Ahsg	P29699	P29699;Q3TIU3;Q3UEK5;Q3UEK9;A0A338P703;A0A338P7G1;A0A338P7H5;O35399	Ahsg	Alpha-2-HS-glycoprotein	FETUA_MOUSE	15	210285	142452	194293	263919	244253	230850	198355	183333
P29758	Ornithine aminotransferase, mitochondrial	Oat	P29758	P29758;Q3TG75;Q3UJK5;Q3UKT3	Oat	Ornithine aminotransferase, mitochondrial	OAT_MOUSE	29	180514	235963	208525	220681	208871	210521	206963	232575
P29788	Vitronectin	Vtn	P29788	P29788	Vtn	Vitronectin	VTNC_MOUSE	12	115829	104525	120245	111720	102821	107492	113902	155587
P30051	Transcriptional enhancer factor TEF-1	Tead1	P30051	P30051;P70210;A0A3F2YNR7;E9Q387;F6QIG2;F6TBI7;F6TTJ9;F6ZIM6;F7B3M8;F8VPU0;Q3USK5;Q8VCA7;Q9Z0P8;E9PVS2;E9PZ73;E9QAK6;Q3UFP5;Q6PAQ8;Q80W05;Q8R2N6	Tead1	Transcriptional enhancer factor TEF-1	TEAD1_MOUSE	6	5588.33	5838.03	6122.08	5942.14	5563.15	5455.27	5673.85	6318.14
P30115	Glutathione S-transferase A3	Gsta3	P30115	P30115;A0A087WQI6;K9JA27;Q9DCU1	Gsta3	Glutathione S-transferase A3	GSTA3_MOUSE	14	420745	669553	516861	397498	435753	461197	448260	461677
P30204	Macrophage scavenger receptor types I and II	Msr1	P30204	P30204;Q3U2C3;Q8CED7;A0A1B0GRS5	Msr1	Macrophage scavenger receptor types I and II	MSRE_MOUSE	9	31569.4	17003.5	21029.1	28331	26972	33475.3	24783.7	30286.2
P30275	Creatine kinase U-type, mitochondrial	Ckmt1	P30275	P30275;A2ARP5;Q545N7	Ckmt1	Creatine kinase U-type, mitochondrial	KCRU_MOUSE	18	226646	355544	292178	299395	302553	333233	323913	354171
P30282	G1/S-specific cyclin-D3	Ccnd3	P30282	P30282;Q3TSW4;Q3TWY0;S4R216;S4R275	Ccnd3	G1/S-specific cyclin-D3	CCND3_MOUSE	1	1563.96	1132.89	1300.56	1718.17	1556.56			1527.21
P30285	Cyclin-dependent kinase 4	Cdk4	P30285	P30285;Q545C3;E9PZX7;E9Q9E4;Q8BP21;Q9D193	Cdk4	Cyclin-dependent kinase 4	CDK4_MOUSE	8	12196.1	11755	12801.1	11264.1	12401.3	12074.3	11774.4	9694.6
P30306	M-phase inducer phosphatase 2	Cdc25b	P30306	P30306;Q3U535;Q9DBN8	Cdc25b	M-phase inducer phosphatase 2	MPIP2_MOUSE	1				4687.49		3703.97
P30355	Arachidonate 5-lipoxygenase-activating protein	Alox5ap	P30355	P30355	Alox5ap	Arachidonate 5-lipoxygenase-activating protein	AL5AP_MOUSE	1	45501.1	39173.5	44343.2	51088	38562.9	41197	38851	45485.7
P30412	Peptidyl-prolyl cis-trans isomerase C	Ppic	P30412	P30412;Q3UC73	Ppic	Peptidyl-prolyl cis-trans isomerase C	PPIC_MOUSE	4	109103	79043.9	87855.5	94142.4	94025.5	116016	100119	101169
P30416	Peptidyl-prolyl cis-trans isomerase FKBP4	Fkbp4	P30416	P30416	Fkbp4	Peptidyl-prolyl cis-trans isomerase FKBP4	FKBP4_MOUSE	34	75544	67712.4	77034.9	78697.5	76191.3	68156.9	70796.9	70246.9
P30677	Guanine nucleotide-binding protein subunit alpha-14	Gna14	P30677	P30677;A0A494BBL5;Q8CBT5	Gna14	Guanine nucleotide-binding protein subunit alpha-14	GNA14_MOUSE	7	14095.5	13234.4	9632.57	12000.1	11140.9	11848.4	11535.6	12100
P30678	Guanine nucleotide-binding protein subunit alpha-15	Gna15	P30678	P30678	Gna15	Guanine nucleotide-binding protein subunit alpha-15	GNA15_MOUSE	1	26208.1	57480.3	38870.1		35501.1			33385.1
P30681	High mobility group protein B2	Hmgb2	P30681	P30681;Q3U566;A0A1B0GQX9;Q3UAZ7;Q9CT19	Hmgb2	High mobility group protein B2	HMGB2_MOUSE	10	111319	84801.5	105239	120076	100463	93465.9	107650	109635
P30993	C5a anaphylatoxin chemotactic receptor 1	C5ar1	P30993	P30993;Q3UCS9	C5ar1	C5a anaphylatoxin chemotactic receptor 1	C5AR1_MOUSE	3	13280.3	7831.78	10942	12888	8747.29	13215.1	13371.8	12778.5
P30999	Catenin delta-1	Ctnnd1	P30999	P30999;E9Q8Z8;D3Z2H2;D3Z7H6;E9Q8Z4;E9Q8Z5;E9Q8Z6;E9Q8Z9;E9Q901;E9Q903;E9Q904;E9Q905;E9Q906;E9Q907;E9Q986;G3X9V2;Q3TPD1	Ctnnd1	Catenin delta-1	CTND1_MOUSE	30	90349.9	96240.7	104975	110818	80910.4	70989.8	75788.7	81789.3
P31001	Desmin	Des	P31001	P31001;Q3V1K9;Q3V2C6	Des	Desmin	DESM_MOUSE	27	125129	108727	122599	139645	107400	109722	108132	112900
P31230	Aminoacyl tRNA synthase complex-interacting multifunctional protein 1	Aimp1	P31230	P31230;Q3UZG4;Q8C2U7	Aimp1	Aminoacyl tRNA synthase complex-interacting multifunctional protein 1	AIMP1_MOUSE	16	33247.9	29272.5	27534.6	26118.2	33804.8	33571.1	31416.1	29861.6
P31240	Platelet-derived growth factor subunit B	Pdgfb	P31240	A0A0R4IZW4;P31240;A0A2R8VHJ1;Q549C6;Q8R3X9	Pdgfb	Platelet-derived growth factor subunit B	PDGFB_MOUSE	1		1272.51	1300.2		7574.05	7729.68	5641.14	5693.19
P31266	Recombining binding protein suppressor of hairless	Rbpj	P31266	O08674;P31266;A0A0J9YTV5;E9Q7W0;Q3U6F1;Q3UM17;Q3V2I2	Rbpj	Recombining binding protein suppressor of hairless	SUH_MOUSE	12	23191.1	15826	17585.8	19638.4	17628.1	17019.9	16486	18090.4
P31324	cAMP-dependent protein kinase type II-beta regulatory subunit	Prkar2b	P31324	P31324;H3BK84;Q3V2X9	Prkar2b	cAMP-dependent protein kinase type II-beta regulatory subunit	KAP3_MOUSE	5	3002.45	3330.19	3191.35	4627.32	4355.66	3614.71	5006.57	5289.14
P31361	POU domain, class 3, transcription factor 3	Pou3f3	P31361	P21952;P31360;P31361	Pou3f3	POU domain, class 3, transcription factor 3	PO3F3_MOUSE	2	5169.04	5222.8	4815.62	5139.81	5461.84	7988.5	6362.35	6812.62
P31428	Dipeptidase 1	Dpep1	P31428	P31428;Q99LA8	Dpep1	Dipeptidase 1	DPEP1_MOUSE	24	323718	534622	349180	293914	422082	413833	485914	534946
P31532	Serum amyloid A-4 protein	Saa4	P31532	P31532	Saa4	Serum amyloid A-4 protein	SAA4_MOUSE	1	5631.42		3873.89	4966.41	3065.36	3111.26	2230.12	2121.88
P31649	Sodium- and chloride-dependent GABA transporter 2	Slc6a13	P31649	P31649;Q3UEF3;Q8VC78	Slc6a13	Sodium- and chloride-dependent GABA transporter 2	S6A13_MOUSE	1	5274.13	8981.23	7769.83	5473.34	5304.85	3133.91	4019.54	4218.97
P31725	Protein S100-A9	S100a9	P31725	P31725;Q3UP42	S100a9	Protein S100-A9	S10A9_MOUSE	8	1109430	920095	1029090	1137980	795037	1018420	781254	1287740
P31750	RAC-alpha serine/threonine-protein kinase	Akt1	P31750	P31750;D3Z783;Q8BS26;D3YXX3;D3YYP9	Akt1	RAC-alpha serine/threonine-protein kinase	AKT1_MOUSE	8	15415.8	13984.7	13335.4	15485.5	11216.5	12780.9	13508.4	11854.2
P31786	Acyl-CoA-binding protein	Dbi	P31786	P31786;D3Z563;Q4VWZ5;Q548W7	Dbi	Acyl-CoA-binding protein	ACBP_MOUSE	8	594393	446333	498783	540207	681920	636230	552041	564181
P31809	Cell adhesion molecule CEACAM1	Ceacam1	P31809	P31809;Q3LFS5;Q3LFS9;Q925P3;Q3LFS6;Q3LFS8	Ceacam1	Cell adhesion molecule CEACAM1	CEAM1_MOUSE	2	2692.18	4127.3	5515.36	4120.82	4609.6	4702.33	5716.24	4706.28
P31938	Dual specificity mitogen-activated protein kinase kinase 1	Map2k1	P31938	P31938;Q3TMJ8;Q3U3F4;Q3UK05;Q9JJE1	Map2k1	Dual specificity mitogen-activated protein kinase kinase 1	MP2K1_MOUSE	18	67484.9	54779.5	57990	77972.4	81501.4	66710.7	61305.8	59633.2
P31996	Macrosialin	Cd68	P31996	P31996;A0A0R4J1C8	Cd68	Macrosialin	CD68_MOUSE	3	62090.6	38292.3	52827.3	67999.1	119063	128534	117782	110888
P32020	Sterol carrier protein 2	Scp2	P32020	P32020;A2APS4	Scp2	Sterol carrier protein 2	SCP2_MOUSE	23	371041	452722	453954	473502	381394	386512	361692	338265
P32037	Solute carrier family 2, facilitated glucose transporter member 3	Slc2a3	P32037	P32037;Q3TPL8;Q4FJP8;Q8BLF7	Slc2a3	Solute carrier family 2, facilitated glucose transporter member 3	GTR3_MOUSE	4	3698.74	3640.75	3900.54	4930.14	3479.77	4436.5	3665.06	6273.11
P32067	Lupus La protein homolog	Ssb	P32067	P32067;Q3TG93;Q564E6;Q8BTU4	Ssb	Lupus La protein homolog	LA_MOUSE	23	77642.9	77533.6	76133.2	86553.4	67180.9	69694.4	80236.9	69261.6
P32114	Paired box protein Pax-2	Pax2	P32114;Q00288;Q02650	P32114;Q00288;Q02650;A0A0R4J267;A2AIU6;A2AIU7;A2AIU8;A2AKM8;G3UW65;G3UX39;G3UZ49;G3UZ71;Q8CIP2;V9GXS5;A0AAQ4VMW4;A0AAQ4VMW5;A2AKM5;A2AKM6;A2AKM7;G3UY80;G3UYK4;G3UZ20;G3UZ86;G3V008;G3X8Q7;I6YXB9	Pax2;Pax5;Pax8	Paired box protein Pax-2	PAX2_MOUSE;PAX5_MOUSE;PAX8_MOUSE	1	4890.48	4203.07	5020.48	3982.2	6640.86	3797.85	5260.56	3997.46
P32233	Developmentally-regulated GTP-binding protein 1	Drg1	P32233	P32233;Q5NBZ3;Q8BNS0;Q8CHR8	Drg1	Developmentally-regulated GTP-binding protein 1	DRG1_MOUSE	18	38585.6	32966.1	37593.7	36535.1	33346.5	35189.8	34561.4	34094.7
P32261	Antithrombin-III	Serpinc1	P32261	P32261;Q543J5	Serpinc1	Antithrombin-III	ANT3_MOUSE	22	72317	43203	75891.5	41879.6	99275	108853	96791.5	93119.1
P32507	Nectin-2	Nectin2	P32507	P32507;Q3TZU9;Q8C6F2;Q91VT9;Q80XJ5	Nectin2	Nectin-2	NECT2_MOUSE	8	18678	17727.5	16926.9	20588.3	16466.1	17673.8	15695.8	19320.8
P32848	Parvalbumin alpha	Pvalb	P32848	P32848;Q545M7	Pvalb	Parvalbumin alpha	PRVA_MOUSE	7	8476.62	14194.7	5936.5	5752.1	9904.7	11499.6	11540.2	11606.9
P32883	GTPase KRas	Kras	P32883	P32883;Q0VDV7;Q5J7N1	Kras	GTPase KRas	RASK_MOUSE	8	71401.3	83987.6	79220	82074.8	76061.7	72052.5	76489.6	76106.1
P32921	Tryptophan--tRNA ligase, cytoplasmic	Wars1	P32921	P32921;Q3U6U7;Q3UDG2;Q4FJZ4	Wars1	Tryptophan--tRNA ligase, cytoplasmic	SYWC_MOUSE	25	67608.1	63589.4	72684.6	72048.3	72817	72583.6	72990	67023.2
P33173	Kinesin-like protein KIF1A	Kif1a	P33173	P33173;Q3UH16;A0A087WQE8;E9Q9G6;E9QAN4;G3UW47;Q5DTN3;Q6P5H4;Q6TA13	Kif1a	Kinesin-like protein KIF1A	KIF1A_MOUSE	5	6020.99	5727.72	5312.94	5936.35	7256.27	6990.25	7103.55	5616.11
P33434	72 kDa type IV collagenase	Mmp2	P33434	P33434;Q3UG07	Mmp2	72 kDa type IV collagenase	MMP2_MOUSE	10	6130.44	4999.07	7449.42	5595.37	7475.47	6907.06	8470.3	6949.89
P33587	Vitamin K-dependent protein C	Proc	P33587	P33587	Proc	Vitamin K-dependent protein C	PROC_MOUSE	4	7709.77	6513.08	8408.48	9052.68	8999.86	7047.41	6347.2	5585.84
P33609	DNA polymerase alpha catalytic subunit	Pola1	P33609	P33609;B9EHJ9	Pola1	DNA polymerase alpha catalytic subunit	DPOLA_MOUSE	2	5151.44	2671.19	3252.79	3520.89	3692.96	1835.03	3105.43	3471.84
P33610	DNA primase large subunit	Prim2	P33610	P33610;Q3THK0	Prim2	DNA primase large subunit	PRI2_MOUSE	5	4836.03	4976.71	9415.48	2705.8	3888.94	3107.42	4147.36	5246.78
P33611	DNA polymerase alpha subunit B	Pola2	P33611	P33611;Q3UZI8;Q8C2T6;A0A494B9D2	Pola2	DNA polymerase alpha subunit B	DPOA2_MOUSE	1	2656.57	2888.71	2515.35	3552.79	3288.86		1996.04
P33622	Apolipoprotein C-III	Apoc3	P33622	P33622;A0A0R4J1N3;E9QP56	Apoc3	Apolipoprotein C-III	APOC3_MOUSE	4	44022	30758.4	37952.3	44060.4	69790.5	69672.6	45745.4	68044.8
P33766	fMet-Leu-Phe receptor	Fpr1	P33766	P33766	Fpr1	fMet-Leu-Phe receptor	FPR1_MOUSE	1	6897.99		6863.58	5702.42	3706.1	5266.39	4697.56	7052.02
P34022	Ran-specific GTPase-activating protein	Ranbp1	P34022	P34022;H7BX22;Q3U6M5	Ranbp1	Ran-specific GTPase-activating protein	RANG_MOUSE	5	142336	97752.1	91028.4	126481	138840	109381	126823	116491
P34056	Transcription factor AP-2-alpha	Tfap2a	P34056;Q61313	P34056;Q61313;A0A0R4J1E6;A0A286YCU0;A0A286YD43;A0A286YDR3;Q8BPN4;Q8CE69;E9Q5N4	Tfap2a;Tfap2b	Transcription factor AP-2-alpha	AP2A_MOUSE;AP2B_MOUSE	1	2197.36	4012.81	2316.29	1837.79	1706.31	2244.02	1579.43	2238.78
P34152	Focal adhesion kinase 1	Ptk2	P34152	P34152;A0A5F8MPY3;K7Q751	Ptk2	Focal adhesion kinase 1	FAK1_MOUSE	24	30319.2	30825.6	28422	26532.2	31055.9	30857.7	30961.9	30065
P34884	Macrophage migration inhibitory factor	Mif	P34884	P34884;Q545F0	Mif	Macrophage migration inhibitory factor	MIF_MOUSE	5	659360	820479	660514	602229	610145	656933	715100	709094
P34902	Cytokine receptor common subunit gamma	Il2rg	P34902	P34902;Q3UPA9;B0QZX1;V5SIM2	Il2rg	Cytokine receptor common subunit gamma	IL2RG_MOUSE	2	6609.63		7075.96	6860.92	4315.26	3157.66	3731.39	6200.14
P34914	Bifunctional epoxide hydrolase 2	Ephx2	P34914	P34914;A8JYK8;Q3UQ71	Ephx2	Bifunctional epoxide hydrolase 2	HYES_MOUSE	33	257124	343365	335989	257753	238646	226752	200182	197082
P34928	Apolipoprotein C-I	Apoc1	P34928	P34928	Apoc1	Apolipoprotein C-I	APOC1_MOUSE	4	84266	52875.9	80992.8	109276	105129	93701.9	74231.6	125851
P34960	Macrophage metalloelastase	Mmp12	P34960	P34960;Q3TCW6;Q8BJC0;D3Z705;Q6GX99	Mmp12	Macrophage metalloelastase	MMP12_MOUSE	4	8667.4	4355.33	7094.42	7817.35	5660.7	6385.83	5895.6	6218.08
P35123	Ubiquitin carboxyl-terminal hydrolase 4	Usp4	P35123	P35123;A0A0A6YVY7;A0A0A6YW28;Q3TEX8;Q5DTK8;Q6NXV6;Q921M8	Usp4	Ubiquitin carboxyl-terminal hydrolase 4	UBP4_MOUSE	24	15758.7	15760.8	15327.5	16449.6	16089.4	15526.8	15520.5	15123.7
P35174	Stefin-2	Stfa2	P35174	P35174	Stfa2	Stefin-2	CYT2_MOUSE	3	7287.47	6783.86	8376.34	8432.33	8097.87	10866	8627.82	15301.1
P35175	Stefin-1	Stfa1	P35175	P35175;A0A384DV91;D6REU3;Q497J0;Q8CGL5	Stfa1	Stefin-1	CYT1_MOUSE	4	7718.52	8356.88	8162.63	9089.58	12545	9558.19	12515.6	21185.2
P35230	Regenerating islet-derived protein 3-beta	Reg3b	P35230	P35230	Reg3b	Regenerating islet-derived protein 3-beta	REG3B_MOUSE	8	110068	30865.6	89327.6	666752	644601	700067	1422510	1519960
P35235	Tyrosine-protein phosphatase non-receptor type 11	Ptpn11	P35235	P35235;Q05C78;Q9CT18	Ptpn11	Tyrosine-protein phosphatase non-receptor type 11	PTN11_MOUSE	21	34882.3	35300.5	32694.7	36113.6	36234.6	32456.7	33166.7	32191
P35276	Ras-related protein Rab-3D	Rab3d	P35276	P35276;Q9CZT8;A2A7Z6;Q543Q4;Q0PD62;Q8BP17	Rab3d	Ras-related protein Rab-3D	RAB3D_MOUSE	3	8802.47	6731.06	11484.9	9508.68	7587.56	8124.13	7079.8	8579.89
P35278	Ras-related protein Rab-5C	Rab5c	P35278	P35278;P61021;Q9CQD1;B2RPS1;Q8C266;Q0PD56;Q3TCT9;Q3TJ39;Q8C458	Rab5c	Ras-related protein Rab-5C	RAB5C_MOUSE	12	176940	196446	187778	175590	178057	186779	179274	182476
P35279	Ras-related protein Rab-6A	Rab6a	P35279	P35279;Q0PD54;D3YV69;Q3U4W5	Rab6a	Ras-related protein Rab-6A	RAB6A_MOUSE	14	90972.5	84177.3	83164.2	87873	86377.7	89076.5	84862.7	89817.9
P35282	Ras-related protein Rab-21	Rab21	P35282	P35282;Q0PD35;Q6A0C7;A0A1W2P6Z4	Rab21	Ras-related protein Rab-21	RAB21_MOUSE	13	112066	111574	106211	103309	102869	107488	111800	100995
[truncated: 6,920 more rows]

## Sheet: All
Protein_ID	Protein_Description	Gene_Name	PG_Protein_Groups	PG_Protein_Accessions	PG_Genes	PG_Protein_Descriptions	PG_Protein_Names	Sequence_Number	Ade-1	Ade-2	Ade-3	Ade-4	Ade_Mean	Ade + E64-1	Ade + E64-2	Ade + E64-3	Ade + E64-4	Ade + E64_Mean	P_value	Fold_Change
[truncated: 8,405 more rows]

[truncated: 3 more sheets: DEPs, KEGG_UP, KEGG_DOWN]
