# Supplementary material
Source: Research Square preprint supplement (doi:10.21203/rs.3.rs-9890117/v1)
Supplement: Supplementary file 1 [file cb673e5f0466a696cddf5bed.docx]

**Supplementary Table 2. Primers used in this study.**

| **Primer name** | **Forward / Reverse (5’ to 3’)** |
| --- | --- |
| Mouse Aqp1 | GACCCACCTGCTAGTTGTCC  CTAAGGTGGGGGACTTGCTG |
| Mouse Lrp2 | GACGCTTCTGACCACACAGA  AACTCAGTGTGGGACGTGAC |
| Mouse Cdh16 | AGAGGGCTGGCTCTGTATCA  CACAACAGTGGCAGAAGTGC |
| Mouse Slc41a1 | CCACTCAGAAGAGGGCTTGG  TGTTGGTAGACACGGAGCAC |
| Mouse NkAa1 | CTGAGCCCAAACACCTGCTA  CTGGAAGCCTTCGGGAAACT |
| Mouse Slc12a3 | TCCATGCCTCCATCACCAAC  CTGAGGAACCCCAGTTCACC |
| Mouse p15 | GAAGACTGCAAGCACGAAGA  AGCTGCAGAAAATGCGTAGG |
| Mouse p16 | GACATCAAGACATCGTGCGA  GGATTTAGCTCTGCTCTTGG |
| Mouse p18 | CCTTATGAAGCACACAGCCT  CACATTCACTGCAGGCTTGT |
| Mouse p19 | GCCTTACTGGGTTACTTGTC  CCTTCTTTGTCCAACACACC |
| Mouse p21 | AGGCATATCTAGGCACTTGC  CCACACACCATAGAATGCTC |
| Mouse p27 | TCTCAGGCAAACTCTGAGGA  AGAATCTTCTGCAGCAGGTC |
| Mouse p57 | GCAAACGTCTGAGATGAGTT  TCCTTGCACATGGTACAGAG |
| Mouse GAPDH | AAGGTCGGTGTGAACGGATTTG  TGGCAACAATCTCCACTTTGCC |
