# Supplementary material
Source: Research Square preprint supplement (doi:10.21203/rs.3.rs-9890117/v1)
Supplement: Supplementary file 2 [file deab8d6d54180494026cdfe8.docx]

**Supplementary Table 1. List of antibodies used in this study.**

| **Antibody** | **Company** | **Catalog No.** | **Application** |
| --- | --- | --- | --- |
| Primary antibody | | | |
| Rabbit anti-α-SMA | Boster, China | BM0002 | WB, IHC |
| Rabbit anti-fibronectin | Abmart, China | T59537M | WB, IF |
| Rabbit anti-Col1a1 | Abcam, USA | 138492 | WB, IHC |
| Rabbit anti-GAPDH | Abways, China | AB0037 | WB |
| Rabbit anti-Lrp2 | Proteintech, China | 19700-1-AP | IHC |
| Rabbit anti-Aqp1 | ZenBIQ, China | 381752 | IHC |
| Rabbit anti-Lamp1 | HUABIO, China | HA722302 | IHC, WB |
| Rabbit anti-Ki67 | CST, USA | 9129S | IHC, IF |
| Mouse anti-p21 | Santa, China | SC-6246 | WB |
| Secondary antibody | | | |
| Alexa Fluor 488 Goat anti-Rabbit IgG | Thermo Scientific, USA | A11034 | IF |
| HRP-conjugated goat anti-rabbit IgG | Abmart, China | M21001 | WB |
| HRP-conjugated AffiniPure goat anti-mouse IgG | MCE, China | HY-P8004 | WB |

Note: WB, Western blot. IF, immunofluorescence. IHC, immunohistochemistry.
